# Supplementary material for: The Potential Regulation of A-to-I RNA Editing on Genes in Parkinson’s Disease
Source: Genes (Basel). 2023 Apr 15;14(4):919. doi: 10.3390/genes14040919 (PMC10137963; doi:10.3390/genes14040919)
Supplement: Supplementary file 1 [file genes-14-00919-s001.zip › SupplementaryTables.xlsx]

## Sheet: TableS1
TableS1. The clinical data for samples involved in this study
PATNO	APPRDX	GENDER	Weight(Kg)	Height(CM)	Tempreture©	AGE(years)	LAST(months)	MDS-UPDRS	H&Y	alpha-synuclein(pg/ml)	Abeta(pg/mL)	tTau(pg/ml)	pTau(pg/ml)	MDS-UPDRS: Movement Disorder Society Unified Parkinson's Disease Rating Scale
3001	PD	2	74.2	183	36.6	65	11	22	1	1154.4	1016	158.6	14.17	Abeta: concentrations of amyloid β-protein
3002	PD	1	70.6	158	37.2	67	13	40	2	3638.3	535.8	302.9	28.69	tTau: total tau
3003	PD	1	82	172	36.8	56	25	47	2	654.5	731.7	110.2	9.21	pTau: tau protein phosphorylated
3010	PD	2	97	184	36.4	47	4	41	2	827.5	842	104.2	8.45
3012	PD	2	79.7	180	36.8	58	3	37	2	1919.2	1125	211.5	17.57
3014	PD	2	71.3	165	36	67	3	47	2	945	572.6	126.7	10.73
3018	PD	1	76.2	157	36.8	60	3	61	2	1039.6	695.7	130	11.1
3020	PD	1	81.2	160	36.8	73	3	45	2	2348.6	402.2	339.2	32.8
3021	PD	1	87.3	159	36.8	64	3	34	2	1569.7	686.6	162.2	13.35
3023	PD	1	72.5	161	37.2	71	9	43	2	1547	1125	172.6	13.53
3024	PD	2	68.9	167	36.8	52	4	24	1	1626.3	1117	154.9	12.83
3026	PD	2	107.1	183	37.6	56	2	31	2	978.1	613	100.1	8.82
3027	PD	2	85.2	174	36.2	69	11	40	2	1903.4	1000	237.6	21.93
3051	PD	2	81.4	176	36.8	71	7	23	2	1371	1133	188.3	15.56
3052	PD	1	51.7	161	36.5	66	11	38	2	953.7	879.5	145.9	11.36
3054	PD	2	82.8	180	36.9	74	7	49	2	1051	923.7	169.7	15.86
3056	PD	2	78.9	179	36.8	55	13	31	1	1847	1267	NA	NA
3058	PD	2	117.7	197	36.8	79	5	50	2	1146.8	411.6	183.9	15.49
3059	PD	2	76.8	174	36.7	82	15	41	2	843	464.9	140.7	12.37
3060	PD	2	65.5	168	36.9	75	13	30	2	1723.6	1490	NA	9.87
3061	PD	1	64.9	165	37	53	4	37	1	998.4	863.3	97.17	NA
3062	PD	1	63	166	37.5	61	2	26	2	2780.5	875.1	231.2	19.32
3066	PD	1	67.2	160	36.7	63	4	42	2	1340.7	1131	NA	NA
3067	PD	2	90.5	176	36.7	73	21	46	2	1857.7	NA	128.1	10.87
3068	PD	2	106.5	179	36.6	70	1	36	2	NA	NA	138.8	12.08
3076	PD	1	55.4	167	37.3	75	16	37	2	1326.1	653.3	182.3	14.02
3077	PD	2	80.6	174	36.5	62	12	88	3	1350.2	868	226.3	16.96
3078	PD	2	82.5	181	36.6	60	3	21	1	989.2	746.2	244.9	23.59
3080	PD	2	80.7	182	36.8	80	3	63	NA	NA	NA	153.6	11.88
3081	PD	1	87	154	0	NA	NA	27	NA	NA	NA	111.5	9.54
3083	PD	1	66.4	163	36.4	65	6	27	2	1362.7	1361	NA	NA
3086	PD	1	96.6	182	36.6	56	3	15	1	1156.4	945.4	168.3	15.45
3088	PD	1	70.4	171	36.6	55	10	22	2	2231.2	1632	139.7	11.75
3089	PD	1	50.3	156	37	56	5	33	2	1172.55	709.6	247.4	21.16
3105	PD	2	101.5	173	35.4	68	24	44	2	766.2	568	122.2	9.41
3107	PD	2	83.9	177	36.7	69	3	24	2	1103.5	654.2	124.3	8.89
3108	PD	0	62.6	152	36	49	1	32	1	592.4	412.6	125.2	10.21
3110	PD	2	81.3	177	35.4	62	1	16	1	2563.9	441.4	98.77	3
3111	PD	2	118	179	36.8	64	1	43	2	1361.4	787.6	303.9	26.64
3113	PD	1	49.8	165	36.3	59	2	36	2	1097.6	939.2	182.9	15.25
3118	PD	2	79.9	178	36.4	60	1	27	2	1942.6	1419	176.4	11.92
3119	PD	2	78.9	175	35.8	64	2	38	2	1220.8	873.6	213	18.64
3120	PD	1	65.8	167	36.7	49	3	38	2	2595.3	1599	142.5	11.21
3123	PD	2	80.3	190	36.2	69	3	16	1	1139.8	575.2	233.5	20.89
3124	PD	2	97.5	170	35	57	4	29	1	1063.9	774.2	126.1	10.93
3125	PD	2	90.2	180	36.4	46	2	28	2	805.5	898.9	108.8	8.76
3126	PD	2	133	180	36.4	64	7	55	2	NA	NA	143.6	10.91
3128	PD	1	81.3	167	36.3	60	2	25	2	805.1	405.9	98.25	5
3130	PD	2	78.2	180	36.1	43	2	13	1	1528	1219	186.9	15.48
3131	PD	2	83.1	170	36.4	71	1	50	2	1582.2	373.4	228.3	20.63
3132	PD	2	99.1	188	36.4	49	1	27	2	432.4	315.9	60	5
3134	PD	2	88.1	173	36.4	38	2	12	1	2028.2	1362	213.3	17.68
3150	PD	1	57	163	36.4	57	23	28	2	1950.5	1177	173.6	16.76
3162	PD	2	89.9	174	36	61	14	38	2	1223.5	876.7	172.4	13.36
3166	PD	2	74.5	177	35.7	59	6	46	2	1658	1506	189.8	15.15
3168	PD	1	93.4	149	35.1	63	36	43	2	4223.3	1293	NA	NA
3173	PD	1	53.6	161	36.9	62	10	20	1	1932.5	NA	242.1	23.1
3174	PD	2	81.7	175	35.9	50	4	28	1	619.8	728.9	178.6	15.56
3175	PD	1	66.7	171	36.2	57	10	18	1	2539.9	1312	100.1	8.82
3176	PD	2	95.6	183	36.6	61	1	19	1	1584.1	661.3	265.1	24
3178	PD	2	65.9	168	35.9	71	11	73	2	1770.6	622.3	187.8	16.63
3179	PD	2	99.6	183	36.6	51	4	38	2	2079.8	1639	125.7	10.92
3180	PD	1	85.9	173	35.9	60	3	54	2	1707.3	1376	213	20.33
3181	PD	1	68.5	168	36.1	67	9	34	2	913.6	916	217.2	17.67
3182	PD	0	71	170	36	54	4	45	2	1269.8	829.1	123.1	10.46
3184	PD	1	61.2	171	36	59	3	18	1	1380.2	1467	141.6	11.02
3185	PD	1	56.1	152	36.1	54	3	19	1	2115	1381	188.3	15.47
3186	PD	1	80.6	165	35.7	61	2	45	1	2585.1	1548	215	17.24
3190	PD	2	78	171	36.2	82	5	39	1	1759.2	1006	297.2	25
3203	PD	2	89.3	182	36.6	56	9	27	1	1486.6	986.7	232.1	21.26
3207	PD	1	81.1	154	37.3	58	32	21	1	2642.2	1787	202.4	17.25
3209	PD	2	84.1	177	36.5	68	19	67	2	1460.3	504	NA	20.71
3211	PD	2	98.4	183	36.7	61	4	21	1	2256.2	1362	247.3	NA
3212	PD	2	90.7	178	36.9	56	6	53	2	1647.7	713.6	192.2	15.6
3214	PD	2	93.5	166	36.5	78	12	36	2	1122.7	603.3	203.3	18.41
3218	PD	2	81.8	174	36.6	63	5	39	2	804.7	377.9	167.1	10.54
3223	PD	2	76.4	173	36.9	66	13	54	2	1292.2	848.1	115.2	9.55
3224	PD	2	66.5	176	36.1	84	1	47	3	2426.6	3000	101.7	8.08
3225	PD	2	78.2	180	36.8	69	5	35	2	1154.1	648.9	175.4	15.76
3226	PD	0	59.4	160	37.1	33	5	19	1	1124.8	743.7	358.6	29.82
3227	PD	1	117.7	164	37.3	50	3	21	1	824.7	1551	139.3	11.38
3228	PD	2	72.3	165	36.6	67	10	45	2	1055.7	625.2	126.9	10.74
3229	PD	2	107.7	198	36.1	73	9	41	1	1505.3	766	173.3	15.2
3230	PD	2	90.3	173	37.1	69	8	29	1	946.95	608.9	141.4	11.36
3231	PD	1	62.1	132	37	55	9	21	2	1001.4	666.6	155.6	12.44
3232	PD	1	93.1	167	36.5	NA	NA	36	2	NA	NA	121.2	10.22
3233	PD	2	110.1	178	36.8	37	6	18	1	1212.9	642.9	136.3	11.78
3234	PD	2	82	171	36.4	69	5	17	1	890.7	549.2	127.5	11.23
3251	PD	1	71.8	170	36.5	59	2	66	2	888.8	527.8	104.7	8.79
3252	PD	1	69.5	165	36.5	47	6	39	2	834	389.4	113.8	8.6
3268	PD	2	88.6	178	36.8	61	3	25	2	1438.3	800.5	60	4
3269	PD	1	47.7	157	36.7	60	4	15	1	1309.4	816.7	NA	NA
3272	PD	2	117.7	188	36.5	39	6	21	1	1506.1	963	159.9	13.14
3275	PD	2	74.5	170	36.7	69	3	34	2	1534.6	713.3	131.9	11.07
3278	PD	2	95.9	180	36.6	65	14	20	2	2193.9	1379	143.4	12.64
3279	PD	2	80.5	183	36.8	63	4	53	2	856.9	482.8	193.2	17.31
3280	PD	2	83.2	185	36.7	47	3	27	2	822.1	643.9	206.1	16.36
3281	PD	2	114.5	180	36.9	56	5	28	2	1538.2	852.9	NA	NA
3282	PD	1	75	160	36.7	62	6	33	2	1712.7	935.8	93.27	5
3284	PD	1	63	153	36.3	64	13	64	2	1772.3	756.2	119.5	9.93
3285	PD	2	93	180	36.7	68	2	25	2	1353.1	1503	119.9	9.43
3288	PD	0	70.7	144	36.7	46	5	30	1	1521.2	922.3	205.7	18.61
3305	PD	2	114	185	36.4	64	2	23	1	1207	577.2	99.16	8.21
3307	PD	2	102.5	182	36.6	66	13	12	1	1717.2	506.4	162.3	13.19
3308	PD	2	74.3	175	36.5	67	5	25	1	1019.8	684.4	173.1	14.04
3309	PD	0	53	163	36.8	54	9	34	1	1706.2	NA	137.4	12.19
3312	PD	2	84.4	176	36.6	78	9	31	2	3262.6	1814	206.5	17.17
3314	PD	1	48.3	163	36.6	77	9	52	2	2599.7	1499	129	10.67
3321	PD	1	73.6	162	36.8	70	7	39	2	1167.95	NA	199.6	18.76
3322	PD	1	73.4	170	36.2	60	4	14	1	1042.4	899	284.5	27.37
3323	PD	2	122.2	191	37	69	3	54	2	818.35	384.2	259.3	22.54
3327	PD	1	63	165	36.1	54	5	14	1	2612.75	932.8	134.5	10.87
3328	PD	2	73.8	165	36.7	63	5	16	1	1577.5	870	141.1	12.72
3332	PD	2	85.7	181	36.3	74	2	30	1	1813.5	578.9	202	18.95
3333	PD	2	92.9	180	36.3	66	2	25	1	2804.5	249	200.3	18.89
3352	PD	2	77.3	175	36.9	51	0	38	2	598.5	653.9	159	15.38
3354	PD	2	90.9	178	36.6	69	23	20	1	1626	1586	60	4
3359	PD	2	79.5	184	36.7	72	2	61	2	694.1	702.6	NA	NA
3364	PD	0	71.4	170	37	39	2	29	1	926.6	908.9	134.5	11.11
3365	PD	2	97.3	183	37.1	48	2	22	1	3159.6	1664	198.9	15.33
3366	PD	2	122.7	183	36.9	61	2	31	2	1645.2	1504	NA	NA
3367	PD	2	77.3	183	36.6	45	5	42	2	2159.2	1186	103	6
3372	PD	2	64.5	169	36.6	71	4	32	1	933	680.1	NA	NA
3373	PD	2	84	187	37	60	3	12	1	3022.3	1202	136.2	10.88
3374	PD	2	103.2	179	36.6	70	5	32	2	1805.5	1305	314.1	27.89
3375	PD	2	100	178	36.6	49	12	55	2	1595.6	1233	216.4	16.81
3376	PD	1	79.1	180	36.9	70	1	45	2	1035.8	836.3	202.4	17.64
3378	PD	2	93.2	180	36.9	48	5	29	2	849.6	563.7	NA	NA
3380	PD	1	62.3	163	36.8	70	2	14	2	1167.95	1131	119.1	9.34
3383	PD	2	86.4	183	36.9	48	8	11	2	1476.5	802.5	277.5	26.77
3385	PD	2	73.6	174	36.9	51	19	41	2	893.3	627.5	161.5	13.47
3386	PD	1	104.5	160	36.8	71	9	32	2	2086	664.3	189.2	18.3
3387	PD	1	65.9	163	36.9	56	5	21	2	1645.7	944.2	349.8	27.81
3392	PD	0	76.4	163	36.8	50	6	34	2	1853	1461	90.58	6
3400	PD	0	92.1	173	36.6	39	9	78	2	921.8	752.4	186.1	13.91
3407	PD	2	100.2	177	37.1	65	7	20	1	596.5	511.8	152.6	12.76
3409	PD	2	65.3	170	36.4	63	2	43	2	1720.3	978.7	101	8.23
3413	PD	2	103.4	191	37.7	NA	NA	65	2	NA	NA	235	20.95
3415	PD	2	81.2	177	36.4	61	2	44	2	1229.5	993	219.5	18.6
3418	PD	2	82.6	180	37	54	9	58	2	1225.3	532	208.9	17.88
3419	PD	1	53.5	158	36.6	67	2	13	1	972.1	859.5	104.7	7
3420	PD	2	91.9	183	37.1	50	2	16	1	1802.7	1124	98.8	8
3421	PD	2	71.2	168	37.1	39	3	14	1	1985.8	1572	144.1	11.8
3423	PD	2	59.4	173	36	69	20	44	2	1094.5	842.8	120.7	10.33
3430	PD	2	100.2	180	37.1	53	1	20	1	1599.6	1174	122.5	11.68
3431	PD	1	51.7	164	36	61	4	22	1	1099.9	713	122.6	11.01
3432	PD	2	104.8	168	36.4	63	7	31	2	NA	NA	168.1	14.38
3433	PD	1	62.6	165	36.6	81	2	24	2	1656.5	1582	226.4	20.09
3434	PD	2	76.2	178	36.6	53	2	42	2	1320.2	1089	160	12.65
3435	PD	2	101.5	188	36.7	54	2	54	1	1407.8	744	166	13.28
3436	PD	2	77.6	180	36.6	51	1	44	2	1522.9	1083	133.1	11.45
3439	PD	2	95.3	188	36.6	57	13	18	1	1207.4	735.8	207.8	16.6
3440	PD	2	88.9	169	36.7	59	2	55	2	1176.7	1155	131.7	11.39
3442	PD	2	103.4	183	36.3	63	5	17	1	1051.4	585.6	133.8	10.86
3443	PD	2	82.6	165	36.6	54	8	37	1	1629.2	1023	170.3	13.25
3444	PD	2	82.6	183	36.8	68	7	33	1	1982.9	1287	138.3	12.75
3445	PD	2	88.9	175	36.8	48	3	27	1	1081.8	1287	168.1	11.42
3446	PD	2	69.9	179	36.2	75	7	54	2	1042.1	1006	107.8	8.6
3447	PD	2	89	175	36	NA	NA	76	2	2899.2	949.7	198.9	15.81
3448	PD	2	99.8	188	37	56	3	36	2	935	622.5	207.6	17.45
3454	PD	1	57.8	154	36.7	57	7	31	1	2508.3	1408	212.9	14.21
3455	PD	2	87.1	175	36.6	67	4	38	2	1311.2	392.9	177.5	15.42
3459	PD	2	134.7	180	36.4	51	23	19	1	799.5	549	315.3	30.56
3461	PD	2	90.3	180	36.6	63	1	32	2	1504.7	942.5	98.77	8.25
3462	PD	0	80.7	163	36.7	44	7	70	2	1167.8	541.2	NA	NA
3467	PD	2	93.4	174	36.3	66	10	28	2	1034.7	995.2	NA	NA
3469	PD	2	103.4	175	36.8	57	4	19	1	1411.9	1285	189.3	13.73
3470	PD	2	68.9	182	36.4	57	8	25	1	854.5	1030	248.2	27.42
3471	PD	2	90.7	168	36.6	73	4	35	2	1724	871.9	60	NA
3472	PD	2	85.7	174	36.6	61	2	25	1	1042.4	653.8	NA	4
3473	PD	1	73.9	160	36.2	55	2	34	1	1716.5	NA	142.8	13.74
3475	PD	2	66.2	162	36.8	48	5	22	1	NA	NA	85	5
3476	PD	2	105.7	182	36.3	65	1	45	2	1213.5	847.8	132.4	11.28
3482	PD	2	78	183	36.6	53	5	18	1	1472.9	1213	142	12.06
3500	PD	0	66	165	37	49	4	50	2	1040.9	507.9	141	11.11
3501	PD	2	77.3	168	37	46	18	31	2	1213.9	884	204	16.68
3502	PD	2	97.3	183	36.4	69	6	47	2	1085	533.3	94.92	8.78
3505	PD	2	72.7	185	36.5	72	1	36	1	1705.1	362.4	166.9	13.62
3507	PD	2	91.8	175	36.9	61	7	29	1	NA	NA	153.8	11.49
3510	PD	2	107.3	183	36.9	59	3	40	2	897.4	594.1	NA	NA
3514	PD	2	98	180	36.7	71	27	47	1	NA	NA	192.3	17.02
3516	PD	2	74	183	37	78	2	29	2	1541.4	1010	88.72	4
3522	PD	2	98	178	36.7	54	2	28	1	1435.2	389.7	NA	NA
3528	PD	1	52	163	36.6	59	5	36	2	2486.5	1256	155.1	11.93
3530	PD	2	116	183	36.8	64	4	38	1	1270.8	1097	157.3	14.02
3532	PD	2	75	180	36.4	61	4	39	1	2581	1618	259.8	24.71
3536	PD	2	111.1	198	36.7	59	6	41	1	1676.4	1030	102.3	10.3
3540	PD	2	111	191	36.5	64	2	82	1	1544.8	943.5	196.6	15.87
3542	PD	1	64.6	163	36.5	67	24	35	2	NA	NA	NA	NA
3552	PD	2	134.5	191	36.6	59	6	47	2	1110	1018	NA	NA
3556	PD	2	85.5	170	36.5	65	6	36	2	1816.3	897.5	107.7	6
3558	PD	2	93.2	178	36	63	12	53	2	979.6	446.5	190.8	17.04
3559	PD	2	74.1	178	36.8	38	6	23	2	1295.6	844.3	158.8	14.38
3564	PD	2	84.1	180	36	69	18	35	2	545.1	274	244.5	22.11
3567	PD	1	71	160	36.8	65	5	32	2	1166	543.3	142.3	12.1
3574	PD	1	80	167	36.6	65	7	77	2	1084.8	484	160.1	13.63
3575	PD	2	94.3	188	36.4	61	3	58	2	1540.9	1128	159.1	13.41
3577	PD	2	99.7	178	36.5	67	3	50	2	674.1	694.8	124.3	11.32
3584	PD	2	88.9	193	36.5	43	4	37	2	1198.6	815.6	97.73	5
3585	PD	2	77.3	178	36.7	49	23	52	2	1639.3	1244	132.6	11.7
3586	PD	2	107.9	182	36.2	62	3	31	1	1108.5	720	60	6
3587	PD	2	81.6	182	36.2	52	1	25	1	944.7	649.7	124.4	10.41
3588	PD	1	79.4	165	36.7	49	29	64	2	1680.9	1154	NA	NA
3589	PD	1	70.3	152	36.1	74	7	33	2	1152.9	751.7	NA	NA
3592	PD	2	81.6	175	37.2	62	4	37	2	810.9	669.7	NA	12.43
3593	PD	1	106.5	170	36.7	55	1	22	2	1358.3	905.9	134.3	NA
3601	PD	1	46.2	157	36.7	63	8	43	2	1422.2	1228	172.5	14.78
3603	PD	2	113.3	187	36.6	58	35	25	1	1590	651.8	94.4	5
3604	PD	1	56.6	167	36.4	69	22	17	1	1143.4	780.7	148.1	12.46
3605	PD	2	69.5	173		74	23	37	2	2845.6	1493	170.8	13.67
3606	PD	1	68.9	157	36.6	50	2	30	2	946.8	1283	114.4	8.99
3607	PD	1	82.5	162	36.6	55	5	38	3	1092.3	639.5	119.3	9.4
3608	PD	2	99.3	172	36.5	46	23	33	1	2918.1	840.5	172.5	14.17
3609	PD	2	102.9	177	36.5	68	21	49	2	563.8	429.9	85.61	11.28
3612	PD	2	77	173	36.4	67	2	38	3	1865.6	1082	82.24	6
3616	PD	2	58.9	157	36.6	77	10	45	1	2312.8	1229	156.7	12.87
3617	PD	2	73	191	34.5	62	2	68	2	1316.2	329.5	157.3	12.7
3621	PD	1	104.6	175	36.5	53	4	39	2	1120.4	507.5	135.1	10.82
3622	PD	2	66.6	172	37	62	2	37	1	818.35	540.9	129.7	11.01
3625	PD	1	67.1	163	36.8	67	1	18	1	1067.7	308.8	306.3	29.47
3628	PD	2	76.2	172	36.8	72	3	31	2	3281.1	1326	195.9	15.6
3629	PD	2	77	179	36.4	53	1	43	2	1104.9	563.7	166.8	13.22
3631	PD	1	52.3	155	36.3	68	6	37	1	2382.4	1237	174	13.59
3638	PD	2	90	192	36.6	66	10	20	2	1409.9	992.5	99.58	4
3650	PD	1	61	165	36.8	67	5	16	2	954	552.2	193.7	18.61
3653	PD	1	57.6	163	37.1	79	32	33	2	3537.1	2711	233.4	22.15
3654	PD	0	61.7	170	37.1	47	8	21	1	939.1	881.3	178	16.84
3659	PD	2	87.8	168	36.1	71	3	26	2	1232.8	NA	NA	NA
3660	PD	1	80.7	162	36.2	76	6	24	1	723.8	238.8	135.2	10.82
3661	PD	1	90.2	167	37	60	14	12	1	774.8	614	101.7	8.37
3664	PD	1	61.6	160	36.2	61	19	7	1	1517.2	969	99.13	8.01
3665	PD	2	84.6	183	36.7	77	4	23	1	1096.1	619.1	337	31.64
3666	PD	2	101.8	177	36	52	5	22	1	1697.1	1153	140.8	13.29
3700	PD	1	64	162	35.5	62	4	38	1	NA	NA	263.3	21.29
3701	PD	2	75	176	35.5	46	2	21	1	1554.1	1225	157.7	12.33
3702	PD	2	70	166	35.5	71	4	25	1	2044.1	758.8	114.9	9.49
3704	PD	2	82	168	35.7	62	2	25	1	NA	NA	279.7	25.79
3707	PD	2	71	172	35.8	61	9	13	1	842.4	603.1	102.6	5
3708	PD	2	82	166	36	71	3	28	1	NA	NA	200.9	16.61
3710	PD	2	78	179	36	55	2	40	2	1034	582.8	117.6	9.76
3711	PD	2	92	184	36.2	37	1	8	1	1043.7	734.7	99.49	6
3752	PD	2	97.5	181	36.8	52	2	34	1	1474	694.8	160.5	12.99
3753	PD	1	65	161	36.6	68	3	25	2	1843.2	514.1	NA	NA
3757	PD	2	85	180	36.3	70	9	54	2	1607.6	1305	83.93	7
3758	PD	2	75	165	36.1	69	9	11	2	2000.4	768.1	168.3	15.13
3760	PD	2	65	165	36.5	68	5	29	2	1323.7	858.3	153	11.98
3762	PD	1	77	170	36.6	70	10	14	2	1060	672.5	244.5	24.9
3763	PD	2	74	178	36.6	59	3	28	2	1219.8	610.5	98.86	8.36
3764	PD	2	81	184	36.6	NA	NA	41	2	1331.5	851.1	129.5	12.1
3766	PD	1	60	169	36.8	63	4	26	2	1410.6	700.2	96.03	5
3770	PD	1	70	167	36.6	54	13	50	2	2153.4	1296	157.8	14.23
3771	PD	1	56.7	162	36.3	74	4	21	2	2226.5	637.2	244.6	22.44
3773	PD	2	101	186	36	50	3	20	2	1427.2	996.4	192.9	13.3
3775	PD	2	90	180	36	62	10	26	2	2272.2	1276	157	12.87
3776	PD	2	69	176	36.9	62	14	35	1	935.5	852.2	152.3	12.67
3777	PD	2	68	168	36.6	62	12	32	2	1120	449.6	134	10.6
3778	PD	0	78	175	36.8	51	5	41	2	NA	NA	142.2	11.42
3780	PD	1	85	174	36	70	4	24	2	1104.1	671	127.5	10.92
3781	PD	2	100	184	36.7	72	18	10	1	1825.3	589.4	141	10.42
3785	PD	0	73	168	36.9	56	2	30	1	NA	NA	223.8	18.48
3787	PD	2	84	175	36.8	48	5	9	1	487.8	346.6	327.4	30.84
3788	PD	2	75	176	35.9	60	2	22	2	1280.2	436.5	139.5	11.89
3789	PD	1	52	164	36.5	57	3	38	2	1177.2	748.1	234.1	21.99
3791	PD	1	51.5	168	36.4	75	3	53	2	2072.1	596.5	130.1	9.36
3792	PD	1	61	165	37.3	57	7	23	1	2372.1	1030	123.7	9.56
3793	PD	2	82	165	36.9	67	2	26	2	1897.9	1293	144.8	10.82
3795	PD	1	61	168	36	73	2	28	2	1375.4	927.3	193.6	15.54
3800	PD	2	84.6	186	36.5	40	3	19	2	1337.6	509.2	60	6
3802	PD	2	92.4	176	36	70	3	29	1	NA	NA	160.3	12.95
3808	PD	2	79	176	36.1	57	14	24	1	NA	NA	117.9	9.72
3814	PD	2	86.5	176	36.5	67	3	7	1	1743.4	1391	281.6	25.47
3815	PD	2	75	178	35.8	62	2	12	1	878.1	548.1	196.6	16.81
3818	PD	1	55	163	36.3	72	1	39	2	2069.7	701.3	190.5	15.45
3819	PD	1	67	172	36.6	52	3	15	1	895.3	694.8	172.7	13.38
3822	PD	2	88	174	35.8	55	2	24	1	1468.4	781.5	139.4	12.07
3823	PD	2	85	174	36.2	57	2	11	1	1456.1	1035	216.4	19.74
3824	PD	1	95	175	35.8	55	4	36	1	805	448.4	113.6	9.68
3825	PD	2	82	180	36.3	58	4	17	1	3342.3	1446	327.1	25.93
3826	PD	2	73	170	36.4	77	4	22	1	1756.7	691.3	105.4	8.39
3827	PD	0	63	158	36.2	75	1	21	2	1168.5	1041	150.4	13.26
3828	PD	2	83.4	186	36.7	77	3	24	2	1615.8	799.8	167.6	13.29
3829	PD	1	78	166	36.3	67	2	33	1	1411.3	1109	104.8	8.1
3830	PD	1	50	168	36.2	51	4	21	1	1577.5	1046	268.4	20.68
3831	PD	2	89	187	36.8	75	4	53	1	918.8	442.3	195.1	16.01
3832	PD	2	95	185	36.7	64	2	20	1	1160	574.8	147.9	11.44
3834	PD	2	75	165	36.2	68	7	36	1	1698.8	803.3	216.6	17.14
3835	PD	2	80	180	36.4	71	3	11	1	868.6	413.7	149	11.75
3838	PD	1	69	165	35.5	60	3	23	1	1240.8	733.1	169.3	12.47
3856	PD	2	80	173	36.6	67	2	12	2	1492.4	898.2	93.8	6
3858	PD	1	62	167	36.6	67	2	37	2	1069	412.1	114.8	9.2
3863	PD	1	100	160	35.5	64	2	47	2	1659	876.3	171.5	14.6
3866	PD	1	69	175	36.1	52	2	37	2	912	585.4	113.8	9.38
3867	PD	1	73	168	36.2	71	2	56	2	1626.2	778.7	130.7	10.86
3868	PD	2	85	174	36.2	69	2	47	2	NA	NA	166.6	13.27
3869	PD	2	94	182	36.1	38	2	23	1	NA	NA	106.1	7
3870	PD	0	95	170	36	41	1	12	1	NA	NA	140.6	10.69
3900	PD	2	72.6	171	36.5	71	15	21	2	1412.2	566	124.1	9.56
3903	PD	2	72.9	177	36.5	71	3	27	2	1755.5	841.7	177.9	14.24
3904	PD	2	96.4	169	37.1	71	3	57	2	1919	1304	150.6	11.46
3905	PD	1	51.5	157	36.8	71	2	34	2	3170.7	2195	216.3	19.27
3910	PD	2	80.4	181	36.3	58	9	35	2	1251.3	930	207.2	19.02
3911	PD	2	63.8	174	36.9	52	2	33	2	1327.2	789.5	290.1	23.24
3914	PD	2	73.8	170	36.8	58	3	15	1	1492.5	578.3	134.4	11.18
3916	PD	1	47	167	36.8	69	10	63	2	2804.5	830.7	155.3	12.15
3951	PD	2	75.5	166	36.1	57	15	22	2	2007.5	1394	180	14.46
3953	PD	2	96.8	177	36.5	53	2	17	1	1549.3	980.9	277.3	22.07
3957	PD	2	83.6	178	36.2	68	3	26	1	966	1060	210.2	16.72
3958	PD	2	69.1	172	36.3	75	8	46	1	1926.7	599.8	168.7	14.55
3960	PD	2	82.7	180	36.1	52	8	19	1	2975.2	1849	161.5	12.07
3963	PD	1	67.3	166	36.8	58	2	25	1	1435	1054	251.7	17.56
3964	PD	2	72.7	174	36.3	39	3	18	1	1123.5	834.8	274.1	23.75
3972	PD	1	72.3	171	36.2	65	2	59	1	1383.4	753.9	181.4	15.99
4011	PD	0	88.7	162	36.7	51	31	24	1	1852.3	746.7	120	9.71
4012	PD	0	59.4	168	36.6	50	3	33	2	1411.5	1453	173.7	12.92
4013	PD	2	86.9	177	36.9	65	4	35	2	1036.5	581.5	186.2	16.52
4016	PD	2	#N/A	#N/A	#N/A	63	3	72	2	1490.4	685.5	170.3	13.11
4019	PD	1	68.6	166	36.8	54	2	34	2	1279.4	1252	115.7	10.41
4020	PD	2	105	188	36.9	60	2	52	2	1374.5	928	146.4	12.99
4021	PD	1	81.5	169	36.8	72	25	42	2	2421.8	648.4	155	13.48
4024	PD	2	74.8	170	36.3	72	4	51	2	1401.1	NA	158.7	12.44
4025	PD	0	63.1	170	36.4	49	2	44	2	NA	NA	321.1	30.64
4026	PD	2	84	180	36.2	75	2	61	2	1504.5	1022	202.3	17.29
4027	PD	2	88.1	170	36.6	66	7	48	2	1951.6	1352	159.9	12.94
4029	PD	2	84	188	36.6	48	3	31	1	1996	1581	189.6	16.5
4030	PD	2	92.9	180	36.6	74	22	44	2	1934.3	1008	213.9	17.84
4033	PD	0	39.5	154	36.7	50	3	29	2	921.7	413.7	182.9	16.72
4034	PD	1	86.6	173	36.3	55	32	26	1	2138.5	681.2	100.2	8.02
4037	PD	2	113	188	36.7	52	8	28	1	1309.8	667.2	124.6	10.13
4038	PD	1	72.5	168	36.4	70	2	40	2	1795.9	1079	122	9.85
4051	PD	1	60.8	157	36.9	53	1	32	2	1683.5	1012	221.3	20.47
4052	PD	1	40.8	147	36.9	66	5	41	2	1711.8	904.7	162.4	13.07
4054	PD	1	64.4	166	36.2	62	2	25	1	1649.3	1010	167.4	13.99
4055	PD	2	69	178	36.6	69	4	26	1	1084.05	772.3	199	15.19
4056	PD	2	99	183	36.2	64	2	29	1	1523.4	1020	131.8	11.6
4057	PD	2	87	168	36.6	61	3	53	2	1660.1	1019	160.7	15.33
4058	PD	2	81	191	36.4	62	2	51	2	2531	1206	169.6	15.25
4059	PD	0	62	168	36.8	46	1	20	1	1346	594.2	328.2	29.06
4070	PD	1	57.3	165	37	79	22	NA	2	1935.9	NA	146.8	11.24
4071	PD	2	91.6	152	36.6	58	11	28	2	1362.1	872.9	194.6	15.33
4072	PD	1	67	165	36.7	57	9	24	2	1184.7	437.5	149.1	12.95
4073	PD	1	54.1	163	36.5	47	6	59	2	762.9	2322	184.6	19.05
4074	PD	2	92.4	180		59	3	45	2	566.4	611.7	223.6	14.63
4077	PD	2	84.5	183	37	48	5	31	2	619.9	484.7	97.71	5
4078	PD	2	93.9	152	36.6	70	5	25	2	2255.3	1546	91.46	8.03
4080	PD	2	67.2	177	35.6	NA	NA	25	1	2092.2	1373	235.7	20.5
4081	PD	2	82.6	174	36	71	18	53	2	NA	NA	199.8	17.03
4082	PD	2	79.6	181	36.4	66	5	30	2	994.4	839.3	136.3	11.71
4083	PD	2	69.6	171	36	45	8	20	1	737.9	618.8	137.8	11.87
4092	PD	1	62	163	36.2	77	1	28	1	1295.9	828.4	123.5	11.46
4093	PD	0	52.2	163	37.1	51	3	32	1	2264.9	1617	214.7	20.1
4094	PD	1	63	155	36.4	77	5	38	1	1048.1	1163	167.7	14.3
4096	PD	0	89.8	169	36.6	49	3	48	1	2955.6	1851	272	28.31
4098	PD	2	89.4	173	36.8	58	6	44	2	942.4	709.5	107.7	8.94
4099	PD	1	68	175	37.1	59	3	23	2	1216.5	839	120.4	10.01
4101	PD	1	46.7	158	36.6	66	2	31	2	2254	1054	127	12.75
4102	PD	2	87.5	182	36.6	68	2	33	2	1941	1625	258.5	21.6
4103	PD	2	77	175	36.3	59	7	12	1	2030.4	1370	208.7	16.66
4106	PD	2	68	168	36.3	72	3	24	2	1704.4	318.4	230.1	21.42
4107	PD	2	65	168	36.7	70	1	42	2	712.1	491.9	114	8.57
4109	PD	2	103.4	168	36.6	67	3	21	1	916.2	523.3	102.6	8.04
4110	PD	2	78	168	36.7	70	2	37	2	2860.8	1715	302.4	27.65
4111	PD	2	107	183	36.7	73	3	62	2	683.9	728.5	120.5	9.43
4112	PD	2	90.3	180	36.6	53	4	11	1	1452.4	874.5	125.4	11.27
4113	PD	0	55	155	36.4	33	23	29	1	1799.2	968.7	144	12.5
4114	PD	2	94.4	180	36.8	66	3	27	2	713.5	472.5	90.2	5
4115	PD	2	78	170	36.6	66	2	43	2	1297.3	1032	157.9	14.49
4117	PD	1	88.5	169	36.9	59	2	24	1	598.5	516.9	80.48	4
4121	PD	1	84.1	163	37	65	13	33	2	1754.4	437.3	157.2	13.8
4122	PD	2	88.4	175	36.8	64	4	29	2	1600.7	956.9	165.4	13.99
4123	PD	1	88.8	168	37	60	4	34	2	2314.9	1359	215.1	18.75
4124	PD	2	97	181		71	4	54	2	2735.1	1349	237.2	21.06
4126	PD	2	135	182	37	55	2	39	2	1123.7	1051	139.5	13.04
3000	HC	1	64	167	35.9	69	NA
3004	HC	2	81.6	175	36	59	NA
3008	HC	1	69.1	161	36.5	81	NA
3011	HC	2	108.7	189	36.6	31	NA
3013	HC	1	51.8	147	37.2	79	NA
3016	HC	2	79.7	175	37	57	NA
3029	HC	2	96.6	176	36	66	NA
3053	HC	2	69.1	169	36.7	68	NA
3055	HC	1	57.4	160	36.8	68	NA
3057	HC	1	65.3	163	36.5	60	NA
3064	HC	1	64.6	157	36.4	60	NA
3069	HC	1	#N/A	#N/A	#N/A	54	NA
3072	HC	0	71.2	160	36.7	47	NA
3073	HC	2	96.3	177	36.9	48	NA
3074	HC	2	85	187	36.9	31	NA
3075	HC	2	76.6	174	36.6	75	NA
3085	HC	2	100.7	183	36.5	56	NA
3087	HC	2	102.1	194	36.4	56	NA
3100	HC	1	66.9	160	36.7	67	NA
3104	HC	2	85.9	175	36	72	NA
3106	HC	1	86.2	162	35.7	70	NA
3109	HC	2	104	185	36.6	52	NA
3112	HC	1	77.2	157	36.4	62	NA
3114	HC	1	70	160	35.7	63	NA
3115	HC	2	79.5	185	36.9	61	NA
3151	HC	2	81.1	178	35.1	57	NA
3156	HC	2	87.5	185	36.5	69	NA
3157	HC	1	65.5	154	36.3	64	NA
3161	HC	2	90.7	179	36.1	44	NA
3165	HC	1	50.3	157	36.4	58	NA
3169	HC	2	122.7	182	35.8	57	NA
3171	HC	2	74	175	36.3	61	NA
3172	HC	2	87.2	178	36.2	70	NA
3188	HC	2	103.3	177	36.4	70	NA
3191	HC	1	60.7	160	35.8	66	NA
3200	HC	2	81.8	177	37.1	55	NA
3201	HC	1	78	155	37	64	NA
3206	HC	0	61.8	159	36.7	31	NA
3216	HC	0	62.8	165	36.6	52	NA
3217	HC	2	83.7	170	37.1	69	NA
3219	HC	2	89.5	168	36.8	69	NA
3221	HC	2	82.7	168	36.6	67	NA
3222	HC	2	82.1	168	37.1	57	NA
3237	HC	1	66.9	168	36.7	70	NA
3257	HC	0	98.6	175	36.7	53	NA
3260	HC	1	97.7	152	36.4	63	NA
3264	HC	1	70.5	180	36.4	60	NA
3270	HC	2	117.7	183	36.4	54	NA
3274	HC	2	95.5	188	36.7	81	NA
3276	HC	1	65	165	36.7	55	NA
3277	HC	2	98.2	168	36.8	65	NA
3300	HC	2	83.5	175	36	52	NA
3301	HC	2	89.9	183	37	52	NA
3310	HC	2	84.8	172	36.5	64	NA
3316	HC	2	73.5	173	36.8	74	NA
3320	HC	2	89.9	177	35.7	55	NA
3350	HC	2	70	171	36.9	78	NA
3351	HC	2	76.4	178	36.6	67	NA
3353	HC	1	74.1	157	36.9	56	NA
3355	HC	2	111.4	175	37.2	32	NA
3357	HC	2	98.2	178	37.2	43	NA
3358	HC	2	77.3	170	36.5	48	NA
3361	HC	1	54.5	152	36.6	56	NA
3362	HC	1	85.9	152	36.9	41	NA
3368	HC	1	97.7	157	37	53	NA
3369	HC	2	84.1	185	36.9	44	NA
3389	HC	2	81.8	180	36.9	71	NA
3401	HC	1	78.9	159	36.7	56	NA
3410	HC	2	91.2	185	36.4	74	NA
3411	HC	2	81.7	183	36.6	40	NA
3414	HC	0	71.7	173	36.3	37	NA
3424	HC	1	60.8	165	36	64	NA
3428	HC	1	79.8	163	36.1	58	NA
3450	HC	2	67.1	173	37.1	51	NA
3452	HC	1	65.3	165	36.6	64	NA
3453	HC	1	58.9	165	36.7	59	NA
3460	HC	2	76.2	173	36.8	70	NA
3464	HC	2	80.7	179	36.4	51	NA
3466	HC	2	86.6	180	36.6	48	NA
3468	HC	2	84.7	171	36.7	57	NA
3478	HC	2	69.9	178	36.4	76	NA
3479	HC	2	74.8	169	36.6	57	NA
3480	HC	1	90	155	36.6	72	NA
3481	HC	2	108.8	185	36.4	62	NA
3503	HC	1	43.2	157	37	31	NA
3515	HC	1	49.1	163	36.8	73	NA
3517	HC	2	86	191	36.8	45	NA
3519	HC	2	101.6	180	37	73	NA
3521	HC	2	88	163	36.7	64	NA
3523	HC	2	93	175	36.7	63	NA
3525	HC	2	86	171	36.7	55	NA
3526	HC	2	124	183	36.7	61	NA
3527	HC	2	88	173	36.7	62	NA
3544	HC	2	83.6	168	36.6	69	NA
3551	HC	2	90	170	36.6	64	NA
3563	HC	2	86.4	168	36	60	NA
3565	HC	2	97.9	175	36.7	54	NA
3569	HC	1	77.3	160	36	40	NA
3570	HC	2	78	175	36.4	72	NA
3572	HC	1	105	168	36.2	57	NA
3600	HC	2	98	185	36.6	55	NA
3613	HC	1	73.9	177	37	55	NA
3614	HC	2	73.9	175	36.8	62	NA
3615	HC	2	81.6	180	36.9	66	NA
3619	HC	0	77.1	165	36.6	32	NA
3620	HC	2	73	178	36.8	69	NA
3624	HC	2	91	175	37.6	61	NA
3627	HC	2	88.5	185	36.5	59	NA
3635	HC	2	88.9	173	36.6	56	NA
3636	HC	2	96	174	36.6	64	NA
3637	HC	2	114.3	170	36.8	57	NA
3651	HC	2	82.9	180	36.7	76	NA
3656	HC	2	101.2	196	35.8	79	NA
3658	HC	2	85.6	182	36.4	58	NA
3668	HC	2	99	183	36.3	76	NA
3750	HC	2	78	185	37	52	NA
3754	HC	2	91	185	36.2	71	NA
3756	HC	2	91	186	36.4	65	NA
3759	HC	0	57	164	36.7	54	NA
3765	HC	1	56	163	36.6	68	NA
3767	HC	1	50	158	35.6	52	NA
3768	HC	2	72	170	36.1	59	NA
3769	HC	2	66	170	36.6	70	NA
3772	HC	2	83	175	35.5	72	NA
3779	HC	2	86	175	36.8	55	NA
3794	HC	1	64	172	36.4	70	NA
3803	HC	1	64.5	159	36.5	69	NA
3804	HC	1	54.2	165	35	60	NA
3805	HC	1	75	161	35.1	56	NA
3806	HC	1	70	165	36.4	59	NA
3807	HC	1	46.5	153	35.6	73	NA
3809	HC	1	54	158	35.3	53	NA
3811	HC	2	78	170	36.1	67	NA
3812	HC	1	70	170	35.1	64	NA
3813	HC	2	78	175	36.9	65	NA
3816	HC	2	75.9	176	36.4	64	NA
3817	HC	2	73.2	183	36.4	73	NA
3850	HC	1	48	160	36.7	50	NA
3851	HC	1	58	160	36.7	54	NA
3852	HC	2	98	180	36.7	76	NA
3853	HC	2	72.5	187	36.6	46	NA
3854	HC	2	95	180	36.8	30	NA
3855	HC	1	54	170	36.7	48	NA
3857	HC	1	50.5	156	36.5	40	NA
3859	HC	2	66.5	175	36.6	59	NA
3901	HC	1	67.1	161	37.3	68	NA
3907	HC	1	58.2	165	36.6	69	NA
3908	HC	2	74.2	176	36	64	NA
3917	HC	2	72.3	180	36.5	69	NA
3950	HC	0	55.9	163	35.9	43	NA
3952	HC	1	61.8	160	36.2	69	NA
3955	HC	2	91.8	187	36.3	53	NA
3959	HC	2	71.8	175	35.9	73	NA
3965	HC	2	82.3	173	36.1	82	NA
3967	HC	2	87.3	175	36.1	56	NA
3968	HC	2	#N/A	#N/A	#N/A	56	NA
3969	HC	1	52.3	162	35.5	80	NA
4004	HC	1	79.9	159	36.9	65	NA
4010	HC	2	69.8	179	36.8	42	NA
4018	HC	2	83.9	187	36.7	63	NA
4032	HC	2	85	175	36.4	68	NA
4067	HC	2	64.4	170	37	61	NA
4085	HC	2	80	171	36	66	NA
4090	HC	2	76	178	37.1	57	NA
4100	HC	2	107.1	178	36.6	58	NA
4104	HC	2	86	178	36.4	66	NA
4105	HC	2	102.3	180	36	66	NA
4116	HC	2	108	183	37	64	NA
4118	HC	1	45	157	36.2	68	NA

## Sheet: TableS2
Table S2. PD-related genes
Gene	DisGeNET	MalaCards	phenopedia	KEGG	GWAS	literature
AAK1			Y
ABCA1	Y		Y
ABCA7	Y		Y
ABCB1	Y		Y
ACMSD	Y	Y	Y
ADH1C	Y		Y
ALAS1					Y
ALDH2	Y		Y
ANG	Y		Y
ANK2	Y				Y
APOA1	Y		Y
APOA2			Y
APOB	Y		Y
APOE	Y		Y
APP	Y		Y
ARHGAP27					Y
ATP13A2	Y		Y	Y	Y
ATP6			Y
ATP6V0A1					Y
ATXN3	Y		Y
ATXN8OS	Y	Y	Y
BAG3	Y				Y
BAP1	Y	Y			Y
BDNF	Y		Y
BIN1	Y		Y
BIN3	Y				Y
BST1	Y		Y		Y
BTBD9			Y
C20orf30			Y
C8orf58					Y
C9orf72	Y		Y
CACNA1A	Y	Y	Y
CACNA1C			Y
CALCA	Y		Y
CAMK2D					Y
CAST	Y		Y
CCDC62	Y	Y	Y
CCK	Y		Y
CCKAR	Y		Y
CCKBR	Y		Y
CCNT2					Y
CD2AP	Y		Y
CD38	Y				Y
CDC71					Y
CDCP2	Y	Y	Y
CDNF	Y		Y
CHCHD2	Y	Y	Y	Y
CHM	Y	Y	Y
CHMP2B	Y				Y
CLU	Y		Y
COMT	Y	Y	Y
COQ7					Y
COX1			Y
COX2	Y		Y
CP	Y		Y
CR1			Y
CRHR1	Y		Y		Y
CRY1	Y		Y
CRY2	Y		Y
CST3	Y		Y
CTSB	Y				Y
CYP2D6	Y		Y
CYP2E1	Y		Y
CYP2J2			Y
DBH	Y	Y	Y
DCTN1	Y	Y	Y
DDRGK1	Y				Y
DGCR8			Y
DGKD	Y		Y
DGKQ	Y	Y	Y		Y
DLG2	Y				Y
DNAH1					Y
DNAJC13	Y		Y		Y
DOCK5			Y
DRD2	Y		Y
DRD3	Y		Y
DYRK1A	Y		Y		Y
EIF4G1	Y		Y	Y	Y
ELAVL4	Y	Y	Y
ELOVL7	Y				Y
ESR2	Y		Y
FAAH	Y		Y
FAM171A1					Y
FAM200B					Y
FAM46A			Y
FAM47E	Y	Y			Y
FBXO48	Y	Y	Y
FGF20	Y	Y	Y		Y
FMR1	Y	Y	Y
FOXO1	Y		Y
FTH1	Y		Y
FTL	Y		Y
FUS	Y		Y
GAK	Y		Y		Y
GALC	Y				Y
GATA2	Y		Y
GBA	Y		Y		Y
GCH1	Y				Y
GIGYF2	Y	Y	Y	Y	Y
GPNMB	Y	Y	Y		Y
GRIN2B	Y		Y
GRN	Y		Y		Y
GSK3B	Y	Y	Y
GSTM1	Y		Y
GSTM5			Y
GSTO1	Y	Y	Y
GSTO2	Y		Y
GSTP1	Y		Y
GSTT1	Y		Y
HCRT	Y	Y	Y
HEXA	Y		Y
HFE	Y		Y
HIP1R	Y		Y
HIVEP3	Y		Y
HLA-B	Y		Y
HLA-C	Y		Y
HLA-DQA1			Y		Y
HLA-DQB1	Y		Y
HLA-DRA	Y	Y	Y
HLA-DRB1	Y		Y
HLA-DRB5	Y	Y	Y
HLA-DRB6					Y
HMOX1	Y		Y
HMOX2	Y		Y
HNMT	Y		Y
HS1BP3	Y		Y
HSPA9	Y	Y	Y
HTR2A	Y	Y	Y
HTR2C		Y	Y
HTRA1	Y		Y
HTRA2	Y	Y	Y	Y	Y
IDE	Y		Y
IL18	Y		Y
IL1A	Y		Y
IL1B	Y		Y
IL1R2					Y
IL1RN	Y		Y
IL21R			Y
IL4R			Y
IL6	Y		Y
ITIH3					Y
ITIH4					Y
ITPKB	Y				Y
KANK1			Y
KANSL1	Y				Y
KAT8					Y
KIAA1267			Y
KLHL1AS			Y
KLHL7					Y
KRT20			Y
LAMP3	Y		Y
LDLRAD1			Y
LINGO1	Y	Y	Y
LINGO2	Y		Y
Lrrk1	Y		Y
Lrrk2	Y	Y	Y	Y	Y
LSM7					Y
MAOA	Y		Y
MAOB	Y	Y	Y
MAP2K5			Y
MAPT	Y	Y	Y		Y
MC1R	Y		Y
MCCC1	Y	Y	Y		Y
MCOLN1	Y		Y
MEIS1			Y
MICU3					Y
MIR4697	Y				Y
MIR4781			Y
MME	Y		Y
MMP2	Y		Y
MMP3	Y		Y
MMP9	Y		Y
MYOC	Y		Y
NAT2	Y		Y
NCKIPSD					Y
ND1	Y		Y
ND2	Y		Y
ND3	Y		Y
ND4			Y
ND5	Y		Y
NDUFV2	Y		Y
NFE2L2	Y		Y
NGLY1			Y
NISCH					Y
NMD3	Y		Y
NOS1	Y	Y	Y
NOS2A			Y
NR4A2	Y	Y	Y	Y
NSF	Y		Y
NUCKS1	Y		Y		Y
NUDT1	Y	Y	Y
NUPL2					Y
OGFOD2					Y
OGG1	Y		Y
OPRM1	Y		Y
PANK2	Y		Y
PARK10	Y	Y	Y
PARK11			Y
PARK16	Y	Y	Y
PARK2			Y
PARK7	Y	Y	Y
PDLIM2					Y
PDXK	Y		Y
PEO1			Y
PHF7					Y
PICALM	Y		Y
PINK1	Y	Y	Y	Y	Y
PITX3	Y		Y
PLA2G6	Y		Y	Y	Y
PMVK			Y		Y
POLG	Y	Y	Y		Y
PON1	Y		Y
PPM1K			Y
PSAP	Y		Y
PSEN1	Y	Y	Y
PSEN2	Y		Y
PSMC3IP					Y
PTPRD			Y
RNF41	Y		Y
RNR2			Y
RXRA	Y		Y
S100B	Y		Y
SATB1	Y				Y
SCARB2	Y		Y		Y
SCN3A					Y
SCN9A	Y		Y
SEMA5A	Y		Y
SERPINA3	Y		Y
SH3GL2	Y				Y
SIPA1L2	Y	Y			Y
SKOR1			Y
SLC11A2	Y	Y	Y
SLC17A6	Y		Y
SLC25A4			Y
SLC25A48			Y
SLC2A13	Y		Y
SLC2A9	Y		Y
SLC39A8	Y		Y
SLC41A1	Y				Y
SLC6A3	Y	Y	Y
SLC6A4	Y	Y	Y
SLCO3A1			Y
SMPD1	Y		Y
SNCA	Y	Y	Y	Y	Y
SOD1	Y	Y	Y
SOD2	Y	Y	Y
SORBS3					Y
SPP1	Y		Y
SPPL2C	Y				Y
SPR	Y		Y		Y
SREBF1	Y		Y
SRGAP3	Y		Y
STAB1					Y
STH	Y		Y		Y
STH					Y
STK39	Y	Y	Y		Y
SV2C	Y		Y
SYN3	Y		Y
SYT11	Y	Y	Y
SYT4					Y
TARDBP	Y		Y
TBP	Y	Y	Y
TCEANC2	Y		Y
TEF	Y		Y
TH	Y		Y
THAP1	Y		Y
TIMP1	Y		Y
TIMP2	Y		Y
TLR9	Y				Y
TMEM163	Y		Y		Y
TMEM175	Y		Y		Y
TMEM229B	Y	Y			Y
TMEM59	Y		Y
TNF	Y		Y
TOR1A	Y		Y
TOX3	Y				Y
TRAPPC4	Y		Y
TREM2	Y		Y
TRNL2			Y
TSC22D2			Y
TUBG2					Y
UCHL1	Y	Y	Y	Y	Y
UNC13B			Y
USP24	Y		Y
USP32			Y
USP40	Y	Y	Y
VDR	Y		Y
VEGFA	Y		Y
VPS13C	Y				Y
VPS35	Y	Y	Y	Y	Y
VPS52			Y
WBSCR17			Y
WNT3	Y		Y		Y
XRCC1	Y		Y
ZNF184	Y				Y
ZNF646	Y				Y
GBA		Y
GLUD2		Y
ATXN2	Y	Y
ADHIC		Y
L0C106627981		Y
DNAJC13		Y
MT-ND1		Y
VPS13C		Y
MIR133B	Y	Y
DTD2		Y
MT-ITK		Y
MIR433		Y
PRKN		Y
PINK1-AS	Y	Y
NEAT1	Y	Y
MAPT-AS1	Y	Y
LINC01262		Y
SNHG1	Y	Y
UCHL1-AS1	Y	Y
HOTAIR	Y	Y
MALATI		Y
DPY19L2P2		Y
H19		Y
LNC01734		Y
MIR4422HG		Y
PCA3		Y
RNU1-1		Y
SCOC-AS1		Y
UCH1LAS		Y
NR4A2内		Y
SNCAIP	Y	Y
PARK12	Y	Y
PARK21		Y
SNCA::GH0410897		Y
TNK2	Y	Y
FGF20::MIR433		Y
IH		Y
LOC108663987		Y
LOC108663996		Y
MT-TP		Y
MT-TT		Y
GDNF	Y	Y
DDC	Y	Y	Y
SLC18A2	Y	Y
PDYN	Y	Y
GPR37	Y	Y
DRD1	Y	Y
HTR1A	Y	Y
PODXL	Y	Y
FBXO7	Y	Y		Y	Y
GAD1	Y	Y
HSPAB		Y
IREB2	Y	Y
SQSTM1	Y	Y
CASP3	Y	Y
SIUB1		Y
CYCS		Y
VPS29	Y	Y
RAB39B	Y	Y
UBE2E3		Y
SIAH1	Y	Y
FGF8	Y	Y
MAPK3	Y	Y
PARP1	Y	Y
VCP	Y	Y
SEPTIN4	Y	Y
PPP1R1B	Y	Y
AIF1	Y	Y
SLC6A2	Y	Y
PARI		Y
NNMT	Y	Y
MAPK8	Y	Y
GRIA1		Y
HIP1R		Y
LMXIA		Y
CALB1	Y	Y
NTS	Y	Y
RAB10	Y	Y
BCHE	Y	Y
MAP2	Y	Y
MEN2		Y
CASP9	Y	Y
BACE1	Y	Y
MFN1		Y
HSPA4	Y	Y
MFHAS1	Y	Y
IOMM20		Y
MIR9-1		Y
VDAC1	Y	Y
ADORA1	Y	Y
CNR1	Y	Y
PTEN	Y	Y
VPS26B		Y
FIS1		Y
CNTF	Y	Y
ALB	Y	Y
RAB5A		Y
PAH	Y	Y
MIR132	Y	Y
RAB7A	Y	Y
BECN1	Y	Y
HSP90AA1	Y	Y
WASHC4		Y
DLG4	Y	Y
SORL1	Y	Y
EPHA3		Y
DNM1L	Y	Y
SNX1		Y
MBP	Y	Y
DRD4	Y	Y
KLF4	Y	Y
PTRHD1		Y
GRIN2A	Y	Y
TUBA1B		Y
MSX1	Y	Y
ARIH1	Y	Y
RIT2	Y	Y			Y
GAPDH	Y	Y
STX1B	Y	Y
EN1		Y
CUL1	Y	Y
RAB3A		Y
POU5F1	Y	Y
AUP1		Y
RING1	Y	Y
MIR124-1		Y
DENR	Y	Y
COQ2	Y	Y
TSPO	Y	Y
KLK6	Y	Y
AMBRA1	Y	Y
UBA1		Y
RAB11A		Y
MAPK10	Y	Y
UBE2D2		Y
TBC1D15		Y
HSPBP1		Y
NQO2	Y	Y
EN2		Y
INPP5F	Y	Y			Y
ENTR1		Y
SNX6	Y	Y
EEA1		Y
MIR24-1		Y
STBD1	Y	Y
OGDH	Y	Y
PVALB	Y	Y
CDC42	Y	Y
ACTG1	Y	Y
SORT1		Y
FAF1	Y	Y
NEFL	Y	Y
DDIT4	Y	Y
DYNC1H1		Y
PRNP	Y	Y
RNF11	Y	Y
IAPP	Y	Y
NCSTN	Y	Y
ARIH2		Y
SACM1L		Y
UBE2N		Y
TAC1	Y	Y
RAB40AL		Y
RAB12		Y
TGM2	Y	Y
TRAP1	Y	Y
HM13		Y
RNF144A		Y
MIR21	Y	Y
GSR	Y	Y
PRODH		Y
PSENEN	Y	Y
APH1A		Y
ATP13A3		Y
UBB	Y	Y
MIR212	Y	Y
CAT	Y	Y
ASPA		Y
BAG2		Y
KCNC3		Y
NFKBIA	Y	Y
PRKCD	Y	Y
TTR	Y	Y
MARK2	Y	Y
RANBP17		Y
EIF4E	Y	Y
MIR34C	Y	Y
EFCAB6		Y
EIF4EBP1	Y	Y
SNX2		Y
CASP8	Y	Y
CAMKK2		Y
ATXN10	Y	Y
MIR26A2		Y
ATP6AP2	Y	Y
TBC1D17		Y
SERPINI1		Y
PENK	Y	Y
UBE2A		Y
NTF4	Y	Y
SORCS3		Y
SNX5		Y
PPP2R2B	Y	Y
DAPK1	Y	Y
APLP2		Y
GMEB1		Y
ACO1	Y	Y
UBE2E2		Y
SFPQ		Y
CLN3	Y	Y
CCL5	Y	Y
HBS1L		Y
EF1A2		Y
PM20D1	Y	Y
SPTBN2		Y
TBC1D5	Y	Y
DDIT3		Y
SAG		Y
CALB2	Y	Y
MIRLET7D	Y	Y
FXN	Y	Y
KALRN		Y
TTBK2		Y
RELN		Y
CCL3	Y		Y
CCL18			Y
SELPLG			Y
UQCRC1			Y
REXO2			Y
VAMP4					Y
FCGR2A					Y
KRTCAP2					Y
KCNS3					Y
MAP4K4	Y				Y
RAB29	Y				Y
KCNIP3					Y
IP6K2	Y				Y
LINC00693					Y
SPTSSB	Y				Y
MED12L					Y
KPNA1					Y
HLA–DRB5					Y
FAM47E–STBD1					Y
CLCN3					Y
RIMS1					Y
PAM	Y				Y
LCORL					Y
C5orf24T					Y
LOC100131289					Y
RPS12					Y
FYN	Y				Y
TRIM40					Y
GS1–124K5					Y
ITGA8	Y				Y
UBAP					Y
FAM49B					Y
RNF141					Y
GBF1	Y				Y
SCAF11					Y
IGSF9B					Y
CAB39L	Y				Y
RPS6KL1					Y
MBNL2					Y
FBRSL1					Y
CHD9					Y
MIPOL1					Y
CHRNB1					Y
ASXL3					Y
CRLS1					Y
MEX3C					Y
DNAH17					Y
MED13					Y
RETREG					Y
UBTF	Y				Y
SPPL2B					Y
RETREG3					Y
OD2					Y
SETD1A	Y				Y
PRKN	Y				Y
DJ-1					Y
DNAJC6	Y				Y
SYNJ1	Y				Y
TMEM230	Y				Y
LRP10	Y				Y
Parkin				Y
DJ1				Y
DNAJC16				Y
IGF1R	Y
PPARGC1A	Y
GFAP	Y
MTHFR	Y
MAP3K5	Y
NGF	Y
NQO1	Y
GSTA4	Y
IGF2	Y
TRPM2	Y
IGF2R	Y
INS	Y
ENO2	Y
FBP1	Y
FCER2	Y
GPX1	Y
HGF	Y
HSPA1A	Y
INSR	Y
MIR181C	Y
MAG	Y
MTA1	Y
BAG5	Y
TCL1B	Y
ADARB2	Y
COL19A1	Y
SLC2A14	Y
EDN1	Y
FGB	Y
CNTNAP2	Y
HBG1	Y
HSPA8	Y
DRAXIN	Y
KCNJ4	Y
CEACAM6	Y
NCAPG2	Y
SLC30A10	Y
NECTIN2	Y
RPL6	Y
RPL23A	Y
RPS8	Y
TALDO1	Y
TFAM	Y
RPL14	Y
OPTN	Y
TWNK	Y
ATG7	Y
GRK5	Y
GDF5	Y
ADH7	Y
ABL1	Y
PPP1R9B	Y
GRK6	Y
HSF1	Y
HSPD1	Y
LEP	Y
PTN	Y
ARPC3	Y
ADCY5	Y
COX10	Y
CCN2	Y
GRK2	Y
GRK3	Y
DBN1	Y
DLG1	Y
FASLG	Y
RRN3	Y
GJC2	Y
HCN3	Y
FEZ1	Y
BCKDK	Y
RAI1	Y
FAM47E-STBD1	Y
LHFPL2	Y
MMRN1	Y
LMNA	Y
RREB1	Y
TPM1	Y
ZSCAN16-AS1	Y
CCNT2-AS1	Y
MAPT-IT1	Y
BORCS7-ASMT	Y
CDH8	Y
FRY	Y
DSCAS	Y
TMC3-AS1	Y
CDK5	Y
MPHOSPH6	Y
LINC02224	Y
LINC02210-CRHR1	Y
LINC02471	Y
LINC02451	Y
AHSA1	Y
LRRK2-DT	Y
LOC107987479	Y
CIT	Y
NLRP3	Y
AGAP1	Y
BORCS7	Y
KLHDC1	Y
CNTN1	Y
COL5A2	Y
COL13A1	Y
SLCO6A1	Y
ADORA2A	Y
CRK	Y
CRP	Y
MAPK14	Y
CSF2	Y
LINC02210	Y
CTSD	Y
CNKSR3	Y
CBLL2	Y
CYP17A1	Y
MDGA2	Y
BRINP1	Y
ACE	Y
ASXL1	Y
EEF1A2	Y
AKT1	Y
ESR1	Y
ALDH1A1	Y
SIRT2	Y
TBC1D9	Y
MCF2L	Y
SYNM	Y
SIRT1	Y
SF3B1	Y
SMUG1	Y
MTOR	Y
GABPA	Y
RNF19A	Y
POLDIP2	Y
GBAP1	Y
GCG	Y
HPGDS	Y
GLP1R	Y
REM1	Y
CTNNA3	Y
GRM5	Y
HTT	Y
RPA2P1	Y
PRSS53	Y
TMC3	Y
MCIDAS	Y
IGF1	Y
IGFALS	Y
IL10	Y
TMPRSS9	Y
ITIH1	Y
GSTK1	Y
TPTE2P6	Y
LAMC2	Y
LINC01121	Y
LRP2	Y
LY6E	Y
ACHE	Y
MPZ	Y
UNC13C	Y
TYW1B	Y
DPY19L2P3	Y
MX2	Y
NOS2	Y
NRTN	Y
PAFAH1B1	Y
PARK3	Y
SYT17	Y
PIK3CA	Y
PIK3CB	Y
PIK3CD	Y
PIK3CG	Y
DCUN1D1	Y
TET2	Y
CNNM2	Y
WBP1L	Y
PLPPR1	Y
PREP	Y
PIP4P2	Y
MAPK1	Y
SLC50A1	Y
PDSS2	Y
PTGS2	Y
BCL2	Y
RET	Y
SCN2A	Y
CCL2	Y
DNAJC1	Y
CASC16	Y
SNCA-AS1	Y
SNCB	Y
SNCG	Y
THY1	Y
TLR4	Y
TP53	Y
TPO	Y
YWHAE	Y
CA8	Y
ZNF165	Y
ZP3	Y
MANF	Y
MUL1	Y
AIMP2	Y
CCDC82	Y
RABEP2	Y
KCNIP4	Y
GPR65	Y
SLC45A3	Y
NDUFAF2	Y
ADAMTSL1	Y
TPTE2	Y
GRAP2	Y
CTIF	Y
PLEKHM1	Y
CRMP1	Y
DAPK2	Y
IFNG	Y
CXCL8	Y
P2RX7	Y
PPARG	Y
REG1A	Y
UTRN	Y
ULK1	Y
CTNNB1	Y
CYP1A2	Y
HIF1A	Y
LAMP2	Y
PAEP	Y
TYR	Y
EHMT1	Y
APLN	Y
ZGLP1	Y
LINC01672	Y
KHDRBS1	Y
PDE10A	Y
LILRB1	Y
TPPP	Y
CHRNA4	Y
CNR2	Y
ADRB2	Y
DECR1	Y
SIRT3	Y
NUP62	Y
GIP	Y
GTF2H1	Y
UBE2K	Y
DNAJB1	Y
LMX1A	Y
DCTN4	Y
RMDN3	Y
PSPN	Y
ACTB	Y
ROS1	Y
SLC1A2	Y
TGFB1	Y
TLR2	Y
RIDA	Y
BPIFA2	Y
CRYZ	Y
CYBB	Y
AGER	Y
GRM4	Y
HMGB1	Y
IL17A	Y
LMX1B	Y
MEF2D	Y
MPO	Y
MSMB	Y
PSPH	Y
STXBP3	Y
CXCR4	Y
CAV1	Y
SIGMAR1	Y
TOMM40	Y
ACOT7	Y
NMS	Y
RMDN2	Y
CYP1A1	Y
ZFPM1	Y
GLA	Y
GSTM2	Y
AGFG1	Y
ACTBL2	Y
AQP4	Y
CHCHD10	Y
MIR221	Y
MIR34B	Y
POTEKP	Y
NTF3	Y
RMDN1	Y
SYBU	Y
MIR433	Y
REST	Y
RPS27A	Y
POTEM	Y
STAT3	Y
ACTG2	Y
CCR2	Y
UBC	Y
TFEB	Y
PPP1R2C	Y
SUCLA2	Y
FHL5	Y
CLOCK	Y
MFN2	Y
DNAJB6	Y
AKR1A1	Y
OGA	Y
PLK2	Y
ADCYAP1	Y
CREB1	Y
CUX1	Y
ZNF746	Y
CYP2D7	Y
DNAJB1P1	Y
DMRT1	Y
RLS1	Y
A2M	Y
ELK3	Y
EPHB1	Y
FABP3	Y
PTK2B	Y
FGF2	Y
FKBP1A	Y
DNM3	Y
GLRX	Y
HP	Y
HSPA5	Y
ICAM1	Y
MALAT1	Y
LAG3	Y
LCN2	Y
MIR205	Y
MIR34A	Y
ATF4	Y
NEDD4	Y
NGFR	Y
NPY	Y
NPC1	Y
PTPA	Y
RHOT1	Y
REN	Y
NIF3L1	Y
CX3CL1	Y
CXCL12	Y
SKP1	Y
SYP	Y
TCF3	Y
PRDX2	Y
TFRC	Y
TRPV1	Y
XBP1	Y
CDK5R1	Y
PHOX2B	Y
GDF15	Y
WASHC1	Y
LRPPRC	Y
CDKN2A	Y
CDKN2D	Y
PSIP1	Y
CHRM3	Y
ADH1B	Y
PROKR2	Y
PACRG	Y
CTSL	Y
CX3CR1	Y
CYP2B6	Y
DNMT1	Y
AGT	Y
AGTR1	Y
EPHB2	Y
F2	Y
FKBP1AP1	Y
FKBP1AP2	Y
FKBP1AP3	Y
FKBP1AP4	Y
FKBP4	Y
SBNO2	Y
NCS1	Y
MACF1	Y
GAP43	Y
PTPN22	Y
NOX1	Y
VPS41	Y
SGSM3	Y
GLUD2	Y
GPX4	Y
GRIA2	Y
GRIN2D	Y
GRM2	Y
SLC40A1	Y
APAF1	Y
FOXA2	Y
APEX1	Y
APRT	Y
FAS	Y
IL4	Y
LAMP1	Y
LDLR	Y
LGALS4	Y
LSAMP	Y
CYP4F3	Y
ARNTL	Y
MIR195	Y
MIR19B1	Y
MIR200A	Y
MIR29C	Y
MEFV	Y
MFAP1	Y
ASAH1	Y
MIR135B	Y
NEDD9	Y
NRF1	Y
NRGN	Y
P2RX3	Y
PEBP1	Y
PCNA	Y
PDE4A	Y
PRRX2	Y
DCDC2	Y
ISYNA1	Y
CFP	Y
PIN1	Y
PNOC	Y
SEPTIN5	Y
PON2	Y
PPARA	Y
PPARD	Y
ACP3	Y
AVP	Y
SBNO1	Y
PARL	Y
PRKAA1	Y
PRKAA2	Y
PRKAB1	Y
PRKAR2A	Y
PRKD1	Y
PSMC4	Y
RAB1A	Y
RAC1	Y
MOK	Y
SGCA	Y
SKIL	Y
RTN4R	Y
WASH6P	Y
SMN1	Y
SMN2	Y
SST	Y
TFR2	Y
TRPC1	Y
TSC2	Y
UCP2	Y
VCAM1	Y
VIPR2	Y
WNT1	Y
YWHAZ	Y
RIC3	Y
HSD3B7	Y
DNAJC5	Y
MAP1LC3B	Y
CASP1	Y
NR1I2	Y
ATG12	Y
MSC	Y
PPIG	Y
ATG5	Y
TOMM20	Y
KEAP1	Y
HDAC6	Y
P2RX5-TAX1BP3	Y
MIR4519	Y
PPIF	Y
OPN1MW3	Y
FST	Y
CEBPB	Y
ARL6IP5	Y
TXNIP	Y
MTCO2P12	Y
CTSC	Y
NES	Y
PRSS21	Y
TMED10	Y
RAB32	Y
CHAT	Y
RIPK3	Y
HRH3	Y
CHP1	Y
LINC02605	Y
MGLL	Y
CHRNA5	Y
TXNRD3	Y
CARD16	Y
H3P13	Y
ADCYAP1R1	Y
CLK1	Y
TPH2	Y
ADH4	Y
COL11A2	Y
COL17A1	Y
CD200R1	Y
COX8A	Y
ATF2	Y
SESN3	Y
CSF3	Y
PWAR1	Y
PLB1	Y
CYP3A4	Y
CD55	Y
DDIT3	Y
DNMT3B	Y
DPEP1	Y
DPP4	Y
DPYSL2	Y
DRD5	Y
E2F1	Y
EGF	Y
EGR1	Y
AHR	Y
ELAVL2	Y
ERG	Y
F2R	Y
F9	Y
MTIF3	Y
FCGR3A	Y
NLRP1	Y
P2RX2	Y
TRIM32	Y
HMGXB3	Y
FOXO3	Y
AKR1B1	Y
MPRIP	Y
ARC	Y
SRRM2	Y
FOSL2	Y
ALOX5	Y
FRAXE	Y
ANKK1	Y
GAD2	Y
FBXO8	Y
GC	Y
OPN1MW	Y
CBLIF	Y
SIGLEC7	Y
GLB1	Y
MCAT	Y
GLUL	Y
PGP	Y
GPX7	Y
NR3C1	Y
GRP	Y
PDIA3	Y
RMC1	Y
HCLS1	Y
NRG1	Y
HK1	Y
HK2	Y
ACACA	Y
NR4A1	Y
FOXA1	Y
HOXD13	Y
HRES1	Y
HTC2	Y
HTR1B	Y
RAB7B	Y
HCAR2	Y
IDUA	Y
APOD	Y
KLK3	Y
IL2RA	Y
IL2RB	Y
IL7	Y
IL13RA1	Y
ISG20	Y
ITGAM	Y
ERCC6L2	Y
KCNJ6	Y
KDR	Y
KRT7	Y
LBP	Y
LGALS1	Y
LGALS3	Y
LIFR	Y
MIR126	Y
MIR137	Y
MIR185	Y
MIR204	Y
MIR22	Y
MIR223	Y
MIR27A	Y
MIR29A	Y
ARSA	Y
MEF2C	Y
MFGE8	Y
MIF	Y
ASCL1	Y
CD200	Y
MRC1	Y
MS	Y
MIR326	Y
MSRA	Y
CYTB	Y
MTR	Y
MTRR	Y
NCL	Y
NDUFA1	Y
NDUFA2	Y
ATM	Y
NDUFS3	Y
NDUFS4	Y
NEFM	Y
ATOX1	Y
ATP1A3	Y
NFKB1	Y
NHS	Y
NOS3	Y
NT5E	Y
NTRK2	Y
NUCB2	Y
GPR143	Y
BDNF-AS	Y
OPRL1	Y
P2RX1	Y
P2RX4	Y
P2RX5	Y
P2RY1	Y
P2RY2	Y
TAS2R13	Y
TRAT1	Y
GAL	Y
PCP4	Y
MZB1	Y
PDC	Y
SCLY	Y
IL23A	Y
SELENOT	Y
PLA2G1B	Y
SHC3	Y
PLD2	Y
PLXNA2	Y
GPR88	Y
POLB	Y
POMC	Y
POU2F1	Y
EGLN1	Y
TMEM106B	Y
TMED9	Y
PPID	Y
TRPM7	Y
CISD1	Y
DNAJC12	Y
PSMB8	Y
PTBP1	Y
BAG1	Y
MIR494	Y
MIR505	Y
SEMA6A	Y
TRIB3	Y
PTPRC	Y
BAX	Y
RBM3	Y
RENBP	Y
RFC1	Y
TRIM27	Y
RNASE1	Y
RNASE4	Y
HCN2	Y
SCD	Y
NEUROG2	Y
NOD2	Y
FBRS	Y
SGTA	Y
SHMT1	Y
SHMT2	Y
SI	Y
ST3GAL2	Y
UCA1	Y
SLC8A1	Y
SLC16A1	Y
SLC18A3	Y
SLC22A1	Y
SMARCA1	Y
SNAP25	Y
SNRNP70	Y
SNRPF	Y
SOAT1	Y
SOD3	Y
BNIP3L	Y
SP1	Y
SPG7	Y
SRY	Y
TAL1	Y
MIR563	Y
TCOF1	Y
TGFB2	Y
TIMP3	Y
TLN1	Y
TNFRSF1B	Y
TRAF2	Y
TRH	Y
OPN1MW2	Y
TXN	Y
UBE2L3	Y
UCHL3	Y
USP1	Y
VIM	Y
XIST	Y
NELFE	Y
SLC52A2	Y
TET1	Y
COASY	Y
NDFIP1	Y
RNF146	Y
CAPN1	Y
AXIN2	Y
H3C1	Y
H3C4	Y
H3C3	Y
H3C6	Y
H3C11	Y
H3C8	Y
H3C12	Y
H3C10	Y
H3C2	Y
C19orf12	Y
SESN2	Y
SYVN1	Y
ATAD1	Y
KHSRP	Y
PDE8B	Y
B3GALT4	Y
RIPK1	Y
CBS	Y
SPHK1	Y
EIF2B3	Y
H3C7	Y
MGAM	Y
NOL3	Y
MIDN	Y
P2RX6	Y
MAP3K13	Y
XPR1	Y
DNER	Y
GPR55	Y
CD19	Y
FTMT	Y
OPN4	Y
HOMER1	Y
ROCK2	Y
SLC25A27	Y
VPS26A	Y
HDAC4	Y
ATG13	Y
BMS1	Y
USP15	Y
ADA	Y
SRA1	Y
VTRNA2-1	Y
MIR543	Y
MUPP	Y
CD24	Y
BCL2L11	Y
MIR1224	Y
MFT2	Y
TIMM23	Y
C4B_2	Y
TMED7-TICAM2	Y
MIR3143	Y
MICOS10-NBL1	Y
ABCB6	Y
MIR4639	Y
ERVW-4	Y
PTPRU	Y
PQBP1	Y
PGR-AS1	Y
TRIM10	Y
G3BP1	Y
WASF2	Y
LOC101928100	Y
ADAM10	Y
TRIM13	Y
EIF1	Y
CDK6	Y
STX6	Y
CALCOCO2	Y
MIR8061	Y
SPRY1	Y
CDKN1A	Y
CDKN1B	Y
LOC102724334	Y
CBSL	Y
STUB1	Y
HAGLROS	Y
TP53COR1	Y
DNAJA2	Y
DLEU1	Y
CCL26	Y
NPM3	Y
NDRG1	Y
SPAG11B	Y
UBAC1	Y
APOA1-AS	Y
SNHG14	Y
NXF1	Y
CIB1	Y
PROCR	Y
CEL	Y
ARFGEF1	Y
NPC2	Y
SCGN	Y
TRIM3	Y
YKT6	Y
SIRT1-AS	Y
BUB1B-PAK6	Y
PTGES3	Y
GJB6	Y
CPLX1	Y
PPP1R17	Y
PPP1R13L	Y
JARID2					Y
MRPS30	Y
JTB	Y
PNPLA6	Y
SUGT1	Y
PAPOLA	Y
RALBP1	Y
PRDX3	Y
COPS5	Y
IMMT	Y
RAB35	Y
LOC110366354	Y
STMN2	Y
RER1	Y
LOC110806262	Y
CHI3L1	Y
CHIT1	Y
SLC2A6	Y
PTGDR2	Y
NACC1	Y
COPE	Y
ECD	Y
FKBP9	Y
PDAP1	Y
TUSC2	Y
GABARAP	Y
GABARAPL2	Y
TRIM9	Y
CHRNB3	Y
CHRNB4	Y
PGLYRP2	Y
PGLYRP3	Y
H3P17	Y
H3P42	Y
NUS1	Y
RAB3IP	Y
MRGPRX3	Y
MRGPRX4	Y
EXOSC6	Y
CMA1	Y
CCR3	Y
MTFMT	Y
CCR5	Y
CCR7	Y
GPR139	Y
ABCC2	Y
CNGA1	Y
KLF6	Y
GNPDA2	Y
GPR151	Y
CPOX	Y
PXDNL	Y
CRAT	Y
SIRPA	Y
STK35	Y
CRYAB	Y
CACUL1	Y
CSF1	Y
CSF1R	Y
CSNK1D	Y
ZFP90	Y
ZNF569	Y
GLIS1	Y
PDIK1L	Y
CTNS	Y
CTRL	Y
FBXO41	Y
CTSK	Y
CTSZ	Y
CXADR	Y
CYC1	Y
CYLD	Y
CYP1B1	Y
CYP2C19	Y
CYP2C9	Y
CYP3A5	Y
SHOC1	Y
CYP27B1	Y
DAPK3	Y
DAXX	Y
FSIP1	Y
DBI	Y
DCC	Y
DCN	Y
TMPRSS6	Y
OXER1	Y
TLE5	Y
TIMM8A	Y
DDX53	Y
RHOV	Y
DLD	Y
DMPK	Y
DOCK3	Y
ATN1	Y
DUSP2	Y
DUSP8	Y
DVL1	Y
APLNR	Y
EEF1A1	Y
EEF2	Y
MEGF8	Y
EGFR	Y
EHHADH	Y
ARID2	Y
EIF2B1	Y
MLKL	Y
EIF4A2	Y
ELAVL1	Y
ELF4	Y
ENDOG	Y
PRSS55	Y
EPHX1	Y
EPHX2	Y
EPO	Y
EPRS1	Y
ERBB2	Y
ERBB3	Y
ERN1	Y
ALAD	Y
ESRRG	Y
MECOM	Y
EZH2	Y
F2RL1	Y
F12	Y
FASN	Y
TPCN2	Y
FCGR2B	Y
ZUP1	Y
FCGR3B	Y
GPRC6A	Y
FDXR	Y
GPC4	Y
FGF1	Y
FGF9	Y
FGF13	Y
FGG	Y
RRAS2	Y
FKBP1B	Y
DLGAP4	Y
FKBP2	Y
FKBP3	Y
FKBP5	Y
RPH3A	Y
SEPHS1	Y
FAIM2	Y
TNIK	Y
SMG1	Y
SARM1	Y
CUL9	Y
KDM6B	Y
FLNB	Y
ACSBG1	Y
SATB2	Y
NEDD4L	Y
AFF2	Y
FN1	Y
ZNF629	Y
DICER1	Y
SIRT5	Y
TPSD1	Y
ATP1B4	Y
ABCA5	Y
TRAM1	Y
ZFYVE26	Y
SEC14L2	Y
LPAR3	Y
FPR2	Y
PDSS1	Y
OPN3	Y
MKRN2	Y
LDOC1	Y
PPP1R15A	Y
SLC7A11	Y
PPIL2	Y
MAFF	Y
IL27	Y
FRAXA	Y
GAST	Y
LCLAT1	Y
EBF3	Y
G6PD	Y
PHYHD1	Y
GABBR1	Y
GK5	Y
GPX6	Y
NOCT	Y
TPSG1	Y
PRDX5	Y
BACE2	Y
B4GALNT1	Y
PART1	Y
GALNS	Y
MRGPRX1	Y
AOC1	Y
GORASP2	Y
FBXO2	Y
FBXO9	Y
GDF1	Y
AMFR	Y
GFPT1	Y
GHR	Y
GHSR	Y
CHORDC1	Y
SEC22A	Y
ATP2C1	Y
ACAD8	Y
GJB1	Y
GJB2	Y
B3GAT1	Y
CACNG5	Y
CACYBP	Y
PDE7B	Y
AGO2	Y
GPR78	Y
SIT1	Y
RBMS3	Y
GLI1	Y
GLI2	Y
MAT2B	Y
TOR2A	Y
GLS	Y
GLUD1	Y
GNAL	Y
GNAQ	Y
SELENOH	Y
GPR3	Y
GPR6	Y
OR10A4	Y
UTS2R	Y
ANGPT1	Y
GPR17	Y
LYPD5	Y
ZNF763	Y
MCHR1	Y
ANGPT2	Y
GPER1	Y
FBXW12	Y
PPIL6	Y
ANK1	Y
TMED10P1	Y
FFAR1	Y
GIT1	Y
ACAD9	Y
FLVCR1	Y
MCTS1	Y
DBNL	Y
GRIK3	Y
HIPK2	Y
GRIN1	Y
GRIN2C	Y
SETD2	Y
SCG3	Y
PYCARD	Y
TBK1	Y
GRM3	Y
GRM8	Y
GSPT1	Y
GTF2H4	Y
USP25	Y
EEF2K	Y
HOOK2	Y
DPP7	Y
PSAT1	Y
UBQLN2	Y
UBQLN1	Y
SLC39A2	Y
OBP2A	Y
HSD17B10	Y
HAS2	Y
HCRTR1	Y
HDAC1	Y
HDAC2	Y
ANXA5	Y
VSX1	Y
HLA-A	Y
HLF	Y
HNF4A	Y
HNRNPA1	Y
TLX2	Y
APBB1	Y
APC	Y
HPD	Y
HSPA1B	Y
HSPA1L	Y
XIAP	Y
HSPB1	Y
HSPB2	Y
HTR6	Y
RSPO2	Y
CPP	Y
GOLGA6A	Y
NANOS3	Y
APOC3	Y
HSD17B13	Y
IFNAR1	Y
PFN3	Y
SEPTIN14	Y
AMIGO2	Y
HCN1	Y
IGHG3	Y
TICAM2	Y
IKBKB	Y
IL9	Y
AQP1	Y
IL13	Y
AQP9	Y
AR	Y
ITGB2	Y
ITPR1	Y
ITPR3	Y
JUP	Y
KCNA5	Y
NDUFS7	Y
ARF3	Y
KCNMA1	Y
KIF2A	Y
KLK2	Y
KNG1	Y
ARG1	Y
KLC1	Y
KRT10	Y
TMEM189	Y
TMEM189-UBE2V1	Y
KRT31	Y
L1CAM	Y
LAD1	Y
UOX	Y
LAMB2	Y
HSP90AB2P	Y
RPSA	Y
LCN1	Y
LIF	Y
LIG4	Y
ASIC2	Y
LPA	Y
LPO	Y
LRP1	Y
LRP6	Y
LRPAP1	Y
LTA	Y
LTF	Y
CD180	Y
MIR100	Y
MIR107	Y
MIR134	Y
MIR142	Y
MIR144	Y
MIR15B	Y
MIR181A2	Y
MIR183	Y
MIR190A	Y
MIR19A	Y
MIR214	Y
MIR217	Y
ARR3	Y
MIR222	Y
MIR27B	Y
MIR30A	Y
MIR30C1	Y
MIR30C2	Y
MIR30E	Y
MIR320A	Y
MIR96	Y
ARRB1	Y
MAP1B	Y
MAP6	Y
MARK1	Y
MAS1	Y
MATN3	Y
MCL1	Y
DNAJB9	Y
MAP3K3	Y
RAB8A	Y
MGMT	Y
MICD	Y
MIP	Y
MAP3K11	Y
KMT2A	Y
AFF1	Y
AFDN	Y
NR3C2	Y
MMP1	Y
MMP7	Y
MMP8	Y
ASIP	Y
MOG	Y
GET3	Y
VN1R17P	Y
GPR166P	Y
MIR148B	Y
MIR324	Y
MIR331	Y
MIR335	Y
MIR342	Y
MT1A	Y
MT1B	Y
MT1E	Y
PLF	Y
MT2A	Y
MT3	Y
MTHFD1	Y
MTNR1B	Y
MTTP	Y
TRNL1	Y
MTX1	Y
MYC	Y
MYCN	Y
MYD88	Y
MYL4	Y
NAGLU	Y
NBL1	Y
NUBP1	Y
NDN	Y
NEDD8	Y
NEFH	Y
NEK1	Y
NFE2	Y
NFE2L1	Y
NFKB2	Y
NKTR	Y
NOTCH2	Y
NOTCH4	Y
NPAS2	Y
NPM1	Y
NPPA	Y
NPPB	Y
NPPC	Y
NPTX2	Y
NTRK1	Y
NUCB1	Y
MIR425	Y
OMP	Y
OPA1	Y
ACO2	Y
P2RY6	Y
P4HB	Y
NOX4	Y
PRDX1	Y
SERPINE1	Y
PAK1	Y
ATP5F1B	Y
REG3A	Y
PAWR	Y
PAX4	Y
ASAP1	Y
SOST	Y
TMED7	Y
SERPINA5	Y
ST8SIA3	Y
POLR1D	Y
PCMT1	Y
TFB1M	Y
TRIM17	Y
PCNT	Y
PDB1	Y
PDCD2	Y
HSD17B7	Y
PDE7A	Y
PDE1B	Y
SIRT7	Y
RAB6B	Y
PDHA1	Y
PPIL1	Y
FKBP7	Y
NUB1	Y
TRAPPC2L	Y
PDPK1	Y
PDR	Y
WWOX	Y
PECAM1	Y
SERPINF1	Y
INPP5K	Y
PER1	Y
PGK1	Y
PHB	Y
SLC25A3	Y
PHF1	Y
SERPINA1	Y
PIGC	Y
PIK3C2B	Y
PITX2	Y
PKD1	Y
PLAG1	Y
IL17D	Y
PANK1	Y
PLD1	Y
PLG	Y
PLEK	Y
SERPINF2	Y
PLK1	Y
FXYD1	Y
ATP7A	Y
PPIL3	Y
PRRX1	Y
IMMTP1	Y
PNMT	Y
H2BS1	Y
TREM1	Y
WNT4	Y
FBXO42	Y
ATR	Y
UGT1A9	Y
MED1	Y
MARCHF5	Y
PPBP	Y
NDE1	Y
ANKHD1	Y
PPP1R1A	Y
HEATR3	Y
ATG16L1	Y
OXR1	Y
MTPAP	Y
MAP1S	Y
RCBTB1	Y
ADI1	Y
QRSL1	Y
FBXW7	Y
PPP4C	Y
PPP3R1	Y
CHDH	Y
PPY	Y
YOD1	Y
TRPV6	Y
GPRC5D	Y
SAGE1	Y
SMPD3	Y
SOX6	Y
PRKACA	Y
PRKACB	Y
PRKAR1A	Y
ARFGAP1	Y
PRKAR1B	Y
MBD5	Y
PRKCG	Y
VPS11	Y
GPRC5C	Y
MYO5C	Y
MYDGF	Y
MAP2K2	Y
MAP2K6	Y
MAP2K7	Y
PRL	Y
PROC	Y
ZNF253	Y
CTNNBL1	Y
PROP1	Y
PROS1	Y
LGMN	Y
PRSS2	Y
KLK7	Y
NPDC1	Y
PSG5	Y
PSMA2	Y
TCIM	Y
PNO1	Y
PAK6	Y
ARNTL2	Y
RGMA	Y
PSMB9	Y
PSMC1	Y
CASS4	Y
TIGAR	Y
PGLYRP4	Y
PELI1	Y
PSMD11	Y
ANKRD50	Y
VN1R1	Y
TAS2R38	Y
PTGER2	Y
PTGER4	Y
CYP20A1	Y
PTH	Y
MIR410	Y
NDRG2	Y
MIR520D	Y
PPM1H	Y
ZNF512B	Y
NLN	Y
ADGRB1	Y
XPO5	Y
GPR158	Y
NUFIP2	Y
NCEH1	Y
SH3RF1	Y
QSOX1	Y
USP37	Y
CWC22	Y
GBA2	Y
PTPN6	Y
HAMP	Y
LSM2	Y
PTPRA	Y
PTX3	Y
DLGAP3	Y
QDPR	Y
RAB3B	Y
RAB6A	Y
RAD51	Y
[truncated: 305 more rows]

## Sheet: TableS3
Table S3. RNA editing events and their associations with gene expressions
Please refer to https://www.synapse.org/#!Synapse:syn39828010/files/

## Sheet: TableS4
Table S4. PD-related pathways for genes associated with RNA editing events
Term	Count	%	PValue	List Total	Pop Hits	Pop Total	Fold Enrichment	Bonferroni	Benjamini	FDR	Description	PubMed
Parkinson disease	186	3.06981	7.35e-33	2813	266	8205	2.03958	2.54e-30	2.54e-30	1.71e-30	neurodegenerative disease
Amyotrophic lateral sclerosis	228	3.763	3.24e-29	2813	364	8205	1.82702	1.12e-26	5.59e-27	3.77e-27	neurodegenerative disease
Huntington disease	192	3.16884	9.16e-25	2813	306	8205	1.83016	3.16e-22	7.9e-23	5.33e-23	neurodegenerative disease
Oxidative phosphorylation	104	1.71645	2.84e-24	2813	134	8205	2.2638	9.79e-22	1.95e-22	1.32e-22	Oxidative phosphorylation mediated pathogenesis of Parkinson's disease and its implication via Akt signaling	35483538
Alzheimer disease	225	3.71348	3.21e-23	2813	384	8205	1.70907	1.11e-20	1.11e-21	7.47e-22	neurodegenerative disease
Pathways of neurodegeneration - multiple diseases	265	4.37366	8.85e-23	2813	476	8205	1.62386	3.05e-20	2.77e-21	1.87e-21	neurodegeneration
Protein processing in endoplasmic reticulum	117	1.93101	1.26e-19	2813	171	8205	1.99572	4.33e-17	2.71e-18	1.83e-18	The unfolded protein response in endoplasmic reticulum has emerged as a key cellular dysfunction associated with the etiology of Parkinson's disease.	33212954
Ubiquitin mediated proteolysis	93	1.53491	7.44e-14	2813	142	8205	1.91031	2.57e-11	1.17e-12	7.88e-13	Loss of function mutations in enzymes of the ubiquitin conjugation/deconjugation pathway are sufficient to cause familial forms of neurodegenerative diseases, suggesting that failure of ubiquitin-mediated proteolysis could also be central to inclusion formation in the more common sporadic cases.	14522239
Autophagy - animal	92	1.5184	1.44e-13	2813	141	8205	1.90317	4.95e-11	2.15e-12	1.45e-12	Increasing evidence suggests that dysregulation of autophagy results in the accumulation of abnormal proteins and/or damaged organelles, which is commonly observed in neurodegenerative diseases	22474616
NOD-like receptor signaling pathway	110	1.81548	2.33e-12	2813	184	8205	1.74375	8.05e-10	2.98e-11	2.01e-11	The proteins of the NLR family are linked with the pathophysiology of neurodegenerative diseases	28029680
Necroptosis	97	1.60092	1.04e-11	2813	159	8205	1.77944	3.6e-09	1.24e-10	8.39e-11	The axonal degeneration in PD is mediated by the necroptosis machinery, a process here referred to as necroaxoptosis, a druggable pathway to target dopaminergic neuronal loss.	31591470
T cell receptor signaling pathway	68	1.1223	2.73e-10	2813	104	8205	1.90715	9.41e-08	2.94e-09	1.99e-09	α-Synuclein-specific T cell reactivity is associated with preclinical and early Parkinson’s disease	32313102
B cell receptor signaling pathway	56	0.924245	1.19e-09	2813	82	8205	1.99197	4.11e-07	1.08e-08	7.3e-09	Decreased expression of B cell related genes in leukocytes of women with Parkinson's disease	21943286
Spinocerebellar ataxia	85	1.40287	1.42e-09	2813	143	8205	1.73377	4.88e-07	1.22e-08	8.24e-09	Spinocerebellar ataxia (SCA) presents heterogeneous clinical phenotypes, and parkinsonism is reported in diverse SCA subtypes.	25866756
Apoptosis	81	1.33685	3.19e-09	2813	136	8205	1.73722	1.1e-06	2.56e-08	1.73e-08	Apoptosis is the main mechanism of neuronal loss in Parkinson's disease	NBK536724
Neurotrophin signaling pathway	69	1.1388	2.29e-07	2813	119	8205	1.69126	7.91e-05	1.58e-06	1.07e-06	Brain-derived neurotrophic factor (BDNF), a neurotrophins, can prevent loss of dopaminergic neurons and repair impaired synapses in PD.	27908981
Nucleocytoplasmic transport	63	1.03978	6.23e-07	2813	108	8205	1.70148	0.000215	4.06e-06	2.74e-06	The nucleo-cytoplasmic transport defects have an emerging role in neurodegeneration.	32616075
Chemokine signaling pathway	99	1.63393	9.89e-07	2813	192	8205	1.50398	0.000341	6.32e-06	4.27e-06	Chemokines and their receptors play a crucial role in the human neurodegenerative Parkinson's disease. First, chemokines and their receptors may mediate the interaction between microglia and neurons, promoting neuronal damage. Second, chemokines also recruit leukocytes such as monocytes to invade the site of inflammation to participate in the neuroinflammatory process. Third, chemokines could inh…	31136787
Cellular senescence	81	1.33685	7.67e-06	2813	156	8205	1.5145	0.00264412	4.07e-05	2.75e-05	Alpha-Synuclein Preformed Fibrils Induce Cellular Senescence in Parkinson’s Disease Models	34359864
Insulin signaling pathway	72	1.18831	1.55e-05	2813	137	8205	1.53292	0.00533031	7.86e-05	5.31e-05	Intranasal insulin protects against substantia nigra dopaminergic neuronal loss and alleviates motor deficits induced by 6-OHDA in rats	26777890

## Sheet: TableS5
TableS5. A-to-I RNA editing events may affect their host genes by interfering in miRNA regulations
RegulatoryType	Editing	ENSG	GeneName	QTL		Pearson
				FDR	Beta	P	R
cis	chr2_37104057_-	ENSG00000055332.18	EIF2AK2	0.000138882	-12.6003	0.000494045	-0.423182
cis	chr22_35660685_+	ENSG00000221963.6	APOL6	1.63592e-08	9.56166	1.73152e-12	0.376532
cis	chr22_45340903_+	ENSG00000100376.12	FAM118A	3.74033e-05	-17.1884	0.000272661	-0.331924
cis	chr22_42383505_-	ENSG00000235568.7	NFAM1	0.000103137	-14.0252	0.00316541	-0.34791
cis	chr2_37103375_-	ENSG00000055332.18	EIF2AK2	0.000151424	-10.2517	0.00346509	-0.357447
cis	chr19_8540453_-	ENSG00000142347.19	MYO1F	0.000152958	-89.1453	0.000142733	-0.412615
cis	chr22_35661178_+	ENSG00000221963.6	APOL6	0.000183861	8.54509	7.12672e-08	0.287494
cis	chr11_65777096_-	ENSG00000254470.3	AP5B1	0.000250901	4.87027	1.9642e-07	0.270035
cis	chr2_37104404_-	ENSG00000055332.18	EIF2AK2	0.000553887	-10.0593	0.0051516	-0.330839
cis	chr2_37103378_-	ENSG00000055332.18	EIF2AK2	0.000590847	-11.9934	0.00152245	-0.388276
cis	chr2_37104126_-	ENSG00000055332.18	EIF2AK2	0.001516	-11.5301	0.00162543	-0.375052
cis	chr2_37104096_-	ENSG00000055332.18	EIF2AK2	0.00237077	-9.18907	0.00447697	-0.292236
cis	chr22_42383647_-	ENSG00000235568.7	NFAM1	0.00256461	-11.0237	0.00449722	-0.283256
cis	chr22_42383534_-	ENSG00000235568.7	NFAM1	0.00272998	-12.281	0.00901685	-0.301601
cis	chr2_216502145_+	ENSG00000197756.10	RPL37A	0.00291603	-643.409	1.00538e-05	-0.517665
cis	chr2_37102118_-	ENSG00000055332.18	EIF2AK2	0.00317713	-8.28229	2.24139e-05	-0.414161
cis	chr19_16155721_+	ENSG00000196684.12	HSH2D	0.00327267	-14.9539	0.0078907	-0.293229
cis	chr19_8540447_-	ENSG00000142347.19	MYO1F	0.00327267	-65.058	0.00201456	-0.312973
cis	chr4_780354_-	ENSG00000249592.6	AC139887.2	0.00329122	-7.75742	0.000971122	-0.345684
cis	chr1_150996625_-	ENSG00000143409.15	MINDY1	0.00356089	-9.92224	0.00808087	-0.323397
cis	chr2_203304404_+	ENSG00000119004.16	CYP20A1	0.00361867	-1.51768	0.000108025	-0.401008
cis	chr2_37104018_-	ENSG00000055332.18	EIF2AK2	0.00369219	-9.68675	0.0259864	-0.302908
cis	chr8_141141963_+	ENSG00000105339.11	DENND3	0.0045845	-71.2977	7.49349e-05	-0.284715
cis	chr14_21460885_-	ENSG00000129472.15	RAB2B	0.00475323	12.7831	6.09432e-06	0.233314
cis	chr16_31123747_+	ENSG00000278133.1	AC135050.6	0.00537671	-12.4052	0.00114597	-0.446715
cis	chr2_37100899_-	ENSG00000055332.18	EIF2AK2	0.00744097	-13.6958	0.00827268	-0.324909
cis	chr9_32456455_-	ENSG00000107201.10	DDX58	0.00754342	-19.0503	0.00893766	-0.266884
cis	chr12_10316482_+	ENSG00000134539.17	KLRD1	0.0083041	-12.4563	2.71291e-05	-0.431405
cis	chr4_780310_-	ENSG00000249592.6	AC139887.2	0.00833042	-6.35228	0.0045809	-0.299535
cis	chr22_17110377_+	ENSG00000177663.14	IL17RA	0.00894645	9.36176	6.60684e-05	0.237375
cis	chr2_37102209_-	ENSG00000055332.18	EIF2AK2	0.0091854	-7.20528	0.00960973	-0.254057
cis	chr22_35659866_+	ENSG00000221963.6	APOL6	0.0143048	4.66821	5.27513e-05	0.209981
cis	chr2_37103423_-	ENSG00000055332.18	EIF2AK2	0.0195953	-4.74422	0.00664271	-0.233414
cis	chr2_37104412_-	ENSG00000055332.18	EIF2AK2	0.0213817	-9.30448	0.0397887	-0.261858
cis	chr17_39760485_-	ENSG00000161405.17	IKZF3	0.0221079	-8.48689	0.00226119	-0.41432
cis	chr12_10315373_+	ENSG00000134539.17	KLRD1	0.0224494	-7.78083	9.6537e-05	-0.249012
cis	chr16_48354469_+	ENSG00000102910.14	LONP2	0.0225272	-3.19986	5.38356e-05	-0.290101
cis	chr4_152621914_-	ENSG00000170006.12	TMEM154	0.0232281	-18.7484	0.000113443	-0.278524
cis	chr19_41872815_+	ENSG00000105372.8	RPS19	0.0235765	-168.746	0.000164785	-0.397567
cis	chr22_45340920_+	ENSG00000100376.12	FAM118A	0.0239536	-24.9957	0.000688749	-0.443818
cis	chr10_14905980_-	ENSG00000152457.18	DCLRE1C	0.024562	3.22427	0.0022449	0.253571
cis	chr1_150996680_-	ENSG00000143409.15	MINDY1	0.0252596	-4.42507	0.00233671	-0.236824
cis	chr16_31123747_+	ENSG00000103510.20	KAT8	0.0259341	-18.561	0.00680716	-0.377955
cis	chr2_37103292_-	ENSG00000055332.18	EIF2AK2	0.0259341	-6.14946	0.0205693	-0.227951
cis	chr22_35661201_+	ENSG00000221963.6	APOL6	0.027761	5.55618	0.000258235	0.191461
cis	chr19_57791826_+	ENSG00000083828.16	ZNF586	0.0282472	-7.15083	0.00688317	-0.289383
cis	chr18_32069039_+	ENSG00000101695.9	RNF125	0.0306224	-1.64463	1.30724e-05	-0.281286
cis	chr19_57216232_+	ENSG00000083844.10	ZNF264	0.0322611	4.88482	0.000364966	0.287261
cis	chr1_184793456_-	ENSG00000135842.17	NIBAN1	0.0330079	22.364	0.00037946	0.184549
cis	chr5_119396896_+	ENSG00000145779.8	TNFAIP8	0.033307	-11.33	0.000190209	-0.310343
cis	chr7_101091606_+	ENSG00000169871.13	TRIM56	0.0338684	-5.31835	0.00248855	-0.310074
cis	chr17_35474732_-	ENSG00000205045.11	SLFN12L	0.0341149	-4.14465	0.000200761	-0.372567
cis	chr15_34231213_-	ENSG00000140199.13	SLC12A6	0.0343262	-12.1085	0.000277226	-0.267886
cis	chr1_89183644_-	ENSG00000162654.9	GBP4	0.0345442	4.3513	0.00085359	0.206775
cis	chr2_37102092_-	ENSG00000055332.18	EIF2AK2	0.0349769	-7.31314	0.0441776	-0.233076
cis	chr18_32069107_+	ENSG00000101695.9	RNF125	0.0355589	-3.14538	8.79046e-05	-0.343489
cis	chr1_168249305_+	ENSG00000213064.10	SFT2D2	0.0361883	-2.82092	0.00036603	-0.221462
cis	chr17_39759294_-	ENSG00000161405.17	IKZF3	0.0375181	-4.70499	0.000338162	-0.273282
cis	chr17_39761882_-	ENSG00000161405.17	IKZF3	0.0378622	-8.14902	0.000326993	-0.422912
cis	chr15_63910791_-	ENSG00000035664.11	DAPK2	0.0386251	-3.62218	0.0036733	-0.259027
cis	chr7_101091612_+	ENSG00000169871.13	TRIM56	0.0409996	-6.09344	0.0174432	-0.287497
cis	chr1_160998027_-	ENSG00000158769.18	F11R	0.0421799	-2.69565	0.00443127	-0.228877
cis	chr7_44833329_-	ENSG00000105968.19	H2AZ2	0.0426424	-6.49485	0.000528582	-0.253058
cis	chr5_115206616_-	ENSG00000164219.10	PGGT1B	0.0429504	-2.94954	0.000130799	-0.298739
cis	chr12_10315885_+	ENSG00000134539.17	KLRD1	0.0436924	-14.4192	6.17094e-05	-0.451187
cis	chr2_37103946_-	ENSG00000055332.18	EIF2AK2	0.0448667	-6.19949	0.00590592	-0.303356
cis	chr22_45340841_+	ENSG00000100376.12	FAM118A	0.047113	-16.0658	0.0250363	-0.236155
cis	chr2_216501776_+	ENSG00000197756.10	RPL37A	0.0481122	-340.753	0.000289299	-0.323949
cis	chr2_37103934_-	ENSG00000055332.18	EIF2AK2	0.0489791	-7.37192	0.0311305	-0.209506
cis	chr17_39759380_-	ENSG00000161405.17	IKZF3	0.0493629	-9.16533	1.90982e-05	-0.441002
cis	chr1_204555414_+	ENSG00000198625.13	MDM4	0.0494368	-13.5026	0.000466486	-0.237174
cis	chrX_74279189_-	ENSG00000230590.11	FTX	0.0494683	-27.66	0.000732161	-0.357306
cis	chr19_15661102_+	ENSG00000186529.16	CYP4F3	0.0494683	-8.68489	0.00052495	-0.19646

## Sheet: TableS6
TableS6. The results of correlation analyses between genes and EIF2AK2 or the RNA editing event
Gene	Gene vs. EIF2AK2		Gene vs. Editing		EIF2AK2-RNA from StarBase, RNAInter and RNAct (score>20)
	P	R	P	R
ENSG00000110955.9	9.91e-16	0.400563	0.186975	-0.167078	StarBase
ENSG00000134440.12	9.58e-12	0.344002	0.477449	-0.0904012	StarBase
ENSG00000002586.20	9.28e-13	0.359025	0.187255	-0.166974	-
ENSG00000006015.18	7.14e-09	0.294385	0.120552	-0.196033	-
ENSG00000014257.16	2.13e-20	0.454894	0.100473	-0.20717	-
ENSG00000022277.13	3.08e-22	0.474034	0.196762	-0.163488	-
ENSG00000031698.13	8e-15	0.388142	0.100302	-0.207271	-
ENSG00000035687.10	4.95e-13	0.363048	0.88603	-0.0182748	-
ENSG00000039123.16	1.17e-06	0.248857	0.688424	-0.0510987	-
ENSG00000047578.13	4.26e-18	0.429113	0.0240999	-0.281756	-
ENSG00000065427.15	6.84e-19	0.438258	0.045794	-0.250601	-
ENSG00000066379.15	6.5e-14	0.375663	0.215887	-0.156824	-
ENSG00000072952.19	4.1e-25	0.501744	0.0160026	-0.300047	-
ENSG00000081791.9	5.11e-15	0.390735	0.0257375	-0.278713	-
ENSG00000083097.14	1.9e-12	0.354381	0.667115	-0.0548036	-
ENSG00000083223.18	4.6e-28	0.527761	0.182854	-0.168631	-
ENSG00000087302.9	5.72e-06	0.232743	0.830992	-0.0272101	-
ENSG00000099785.10	0.000490094	0.179876	0.114365	-0.199302	-
ENSG00000100890.16	4.55e-08	0.27881	0.810858	-0.0305092	-
ENSG00000103254.10	5.11e-08	0.277789	0.239262	-0.14922	-
ENSG00000104522.16	0.000826346	0.172646	0.0810441	-0.219739	-
ENSG00000105968.19	3.88e-14	0.378784	0.277886	-0.137702	-
ENSG00000108021.20	2.02e-19	0.444211	0.490965	-0.0876586	-
ENSG00000110619.18	6.14e-24	0.490725	0.0175911	-0.295917	-
ENSG00000112773.16	3.47e-84	0.800872	0.00493556	-0.347239	-
ENSG00000113163.18	9.76e-23	0.4796	0.356403	-0.117192	-
ENSG00000113407.14	9.4e-13	0.359396	0.890267	-0.0175912	-
ENSG00000113643.9	1.39e-05	0.223496	0.86791	-0.0212048	-
ENSG00000113648.16	2.43e-21	0.465414	0.129009	-0.191766	-
ENSG00000115866.11	1.02e-09	0.310181	0.726999	0.0444953	-
ENSG00000116299.17	3.71e-06	0.237567	0.0201182	-0.28996	-
ENSG00000116459.11	6.28e-10	0.31393	0.760148	-0.0389133	-
ENSG00000116747.13	3.61e-17	0.418572	0.351718	-0.11833	-
ENSG00000116863.11	1.91e-36	0.591913	0.00670752	-0.335604	-
ENSG00000118308.15	1.56e-20	0.4569	0.135208	-0.188772	-
ENSG00000119979.18	7.15e-30	0.543277	0.0293805	-0.272488	-
ENSG00000122490.19	2.91e-10	0.31971	0.262347	-0.142197	-
ENSG00000122545.20	4.95e-11	0.332589	0.848136	-0.0244148	-
ENSG00000122783.17	1.01e-37	0.6005	0.00312887	-0.363774	-
ENSG00000124172.10	9.15e-06	0.228052	0.603519	0.066151	-
ENSG00000124575.7	0.00867072	0.136096	0.822001	-0.028681	-
ENSG00000124635.9	0.0115768	0.130957	0.326779	-0.124554	-
ENSG00000125354.24	2.55e-17	0.420403	0.0816879	-0.219287	-
ENSG00000126005.17	2.81e-17	0.419892	0.0237529	-0.282424	-
ENSG00000130770.18	1.07e-08	0.291412	0.22338	-0.154327	-
ENSG00000130813.18	7.62e-67	0.744929	0.00131002	-0.39316	-
ENSG00000132475.10	2.57e-34	0.577029	0.00212761	-0.377124	-
ENSG00000132680.11	6.66e-16	0.402778	0.311116	-0.128618	-
ENSG00000133321.11	2.19e-14	0.382688	0.0737729	-0.225061	-
ENSG00000133706.19	1.17e-10	0.326439	0.760949	-0.0387794	-
ENSG00000133943.21	2.16e-37	0.598303	0.00641639	-0.337314	-
ENSG00000134444.15	4.61e-17	0.417272	0.451552	-0.0957748	-
ENSG00000134452.20	5.35e-16	0.404002	0.0156122	-0.301116	-
ENSG00000134684.11	3.13e-12	0.351515	0.11824	-0.197239	-
ENSG00000134744.14	4.97e-13	0.363478	0.560794	-0.0740676	-
ENSG00000135048.14	2.35e-21	0.465553	0.0266633	-0.277064	-
ENSG00000135390.21	9.49e-12	0.344066	0.113774	-0.199621	-
ENSG00000135842.17	2.44e-26	0.513413	0.00240134	-0.372994	-
ENSG00000136243.17	4.7e-11	0.332946	0.856511	0.0230535	-
ENSG00000136536.15	5.07e-22	0.472412	0.67997	-0.0525632	-
ENSG00000136628.18	1.46e-09	0.307425	0.997053	-0.00047102	-
ENSG00000136813.14	4.4e-23	0.483016	0.0395272	-0.258042	-
ENSG00000138434.17	1.8e-24	0.496359	0.254356	-0.144578	-
ENSG00000138463.9	7.28e-14	0.37545	0.420917	-0.102357	-
ENSG00000138758.12	6.47e-11	0.330675	0.0487019	-0.24743	-
ENSG00000139146.14	1.18e-08	0.290624	0.884478	0.0185255	-
ENSG00000139239.7	0.00216965	0.158703	0.691069	0.0506417	-
ENSG00000139637.14	2.15e-05	0.218657	0.0959044	-0.209941	-
ENSG00000140105.18	3.13e-40	0.616614	0.000928033	-0.404094	-
ENSG00000141452.10	1.48e-15	0.398313	0.0534385	-0.242582	-
ENSG00000142396.10	5.53e-14	0.377116	0.46427	-0.0931154	-
ENSG00000143207.21	2.51e-26	0.513299	0.0812536	-0.219592	-
ENSG00000145416.13	2.19e-18	0.432986	0.791125	-0.0337622	-
ENSG00000145495.16	4.94e-19	0.440396	0.0658737	-0.23134	-
ENSG00000146826.17	9.6e-19	0.437113	0.046159	-0.250194	-
ENSG00000149716.13	2.39e-12	0.353299	0.0316503	-0.268931	-
ENSG00000150527.17	9.11e-18	0.425742	0.452064	-0.0956668	-
ENSG00000150756.14	6e-09	0.296184	0.545384	-0.0769916	-
ENSG00000152078.10	0.50675	-0.0345747	0.295352	-0.132844	-
ENSG00000152234.16	1.34e-10	0.325446	0.544366	-0.0771861	-
ENSG00000153310.19	1.38e-28	0.53274	0.132503	-0.190065	-
ENSG00000154518.10	1.61e-10	0.32408	0.856912	-0.0229884	-
ENSG00000155099.8	2.32e-17	0.420888	0.133193	-0.189734	-
ENSG00000156030.13	1.84e-14	0.383723	0.0465353	-0.249777	-
ENSG00000156411.10	0.000595826	0.177441	0.983888	-0.00257503	-
ENSG00000157538.14	7.62e-20	0.449427	0.244822	-0.147487	-
ENSG00000158373.8	1.27e-05	0.224488	0.236471	-0.1501	-
ENSG00000158406.5	0.00823006	0.137006	0.462449	0.0934937	-
ENSG00000159199.14	3.81e-08	0.280692	0.0815294	-0.219398	-
ENSG00000162384.14	1e-13	0.373482	0.145004	-0.184243	-
ENSG00000162976.13	4.15e-13	0.364618	0.210215	-0.158755	-
ENSG00000163041.13	2.84e-25	0.50379	0.121085	-0.195758	-
ENSG00000163946.13	1.31e-11	0.341859	0.868232	-0.0211527	-
ENSG00000164032.12	9.25e-12	0.344243	0.295988	-0.132671	-
ENSG00000164329.13	2.18e-21	0.465895	0.0706412	-0.227483	-
ENSG00000165406.16	0.000443185	0.181478	0.302149	-0.131005	-
ENSG00000165629.20	1.61e-08	0.28803	0.627911	-0.0617427	-
ENSG00000166595.12	7.46e-13	0.360883	0.0449657	-0.251534	-
ENSG00000166734.20	5.65e-19	0.439732	0.0411826	-0.255987	-
ENSG00000166797.11	6.22e-13	0.362049	0.415751	-0.103493	-
ENSG00000166986.15	7.22e-20	0.449687	0.00956081	-0.321599	-
ENSG00000167283.8	0.0593409	0.0979935	0.502521	-0.085345	-
ENSG00000167483.19	0.00237429	0.15732	0.885649	0.0183364	-
ENSG00000167863.12	1.08e-10	0.326984	0.304799	-0.130295	-
ENSG00000168298.7	2.57e-07	0.263635	0.164887	-0.175712	-
ENSG00000168385.18	1.82e-15	0.397135	0.314744	-0.127666	-
ENSG00000169020.10	0.00479826	0.146128	0.950617	-0.00789702	-
ENSG00000169100.14	2.2e-11	0.338281	0.423126	-0.101873	-
ENSG00000169612.4	4.73e-15	0.39167	0.408901	-0.105012	-
ENSG00000170445.16	1.11e-14	0.386706	0.0715098	-0.226803	-
ENSG00000171984.15	0.0755049	0.0923915	0.08605	-0.216291	-
ENSG00000172053.18	4.41e-11	0.333398	0.266532	-0.140969	-
ENSG00000172775.17	5.57e-21	0.461635	0.115796	-0.198534	-
ENSG00000173209.23	2.86e-17	0.419794	0.108656	-0.20244	-
ENSG00000173436.15	1.08e-09	0.309777	0.878799	-0.0194428	-
ENSG00000173915.16	0.00318518	0.152735	0.91792	-0.0131402	-
ENSG00000174718.12	1.42e-20	0.457326	0.751208	-0.0404111	-
ENSG00000174917.9	7.58e-07	0.253424	0.175056	-0.171639	-
ENSG00000175061.18	0.0212047	0.119608	0.849708	0.024159	-
ENSG00000175701.10	0.0128843	0.129011	0.236454	-0.150105	-
ENSG00000176731.12	6.79e-06	0.231244	0.595691	-0.0675821	-
ENSG00000177406.5	2.81e-14	0.381208	0.184286	-0.168089	-
ENSG00000178927.18	4.13e-22	0.473308	0.00421044	-0.353102	-
ENSG00000179978.11	5.55e-21	0.461652	0.00635951	-0.337656	-
ENSG00000180096.12	9.43e-09	0.292487	0.450493	-0.0959981	-
ENSG00000180573.9	5.23e-18	0.428587	0.272018	-0.139379	-
ENSG00000180596.7	1.38e-06	0.247582	0.129193	-0.191676	-
ENSG00000181218.5	0.704921	0.019725	0.608572	0.0652315	-
ENSG00000181666.18	4.86e-10	0.315868	0.116078	-0.198383	-
ENSG00000181744.9	1.16e-10	0.326456	0.238435	-0.14948	-
ENSG00000182093.16	7.65e-09	0.294206	0.437335	-0.098797	-
ENSG00000183508.5	0.0479445	0.10276	0.102632	-0.205893	-
ENSG00000183598.4	0.00401384	0.149038	0.794813	-0.0331527	-
ENSG00000183784.7	2.17e-37	0.598285	0.0033483	-0.361368	-
ENSG00000184260.6	0.00101305	0.169976	0.534608	-0.0790599	-
ENSG00000184270.6	2.69e-07	0.263231	0.459791	-0.0940473	-
ENSG00000184357.5	0.00645641	0.141173	0.658075	-0.0563889	-
ENSG00000184584.13	2.13e-16	0.409043	0.0103023	-0.318566	-
ENSG00000184640.19	2.6e-13	0.367563	0.0958682	-0.209964	-
ENSG00000184678.10	1.65e-24	0.496711	0.037226	-0.261021	-
ENSG00000184897.6	3.19e-14	0.380445	0.0867992	-0.215789	-
ENSG00000185130.5	0.041092	0.106105	0.654462	-0.0570249	-
ENSG00000186166.9	1.81e-13	0.369837	0.0835749	-0.217976	-
ENSG00000186205.13	1.19e-16	0.412193	0.487268	-0.0884047	-
ENSG00000187837.4	5.5e-05	0.207798	0.51972	-0.0819519	-
ENSG00000188820.13	1.22e-27	0.524751	0.0191644	-0.292129	-
ENSG00000196295.12	3.16e-20	0.453589	0.107657	-0.203003	-
ENSG00000196305.18	2.29e-09	0.303894	0.888243	-0.0179177	-
ENSG00000196588.20	3.82e-20	0.452705	0.0106114	-0.317357	-
ENSG00000196747.4	0.0155702	0.125506	0.633865	-0.0606778	-
ENSG00000196787.3	0.115486	0.0818574	0.946881	-0.00849532	-
ENSG00000196821.10	2.44e-22	0.475616	0.0260218	-0.278201	-
ENSG00000196866.3	1.25e-06	0.248555	0.555856	-0.0750004	-
ENSG00000196890.4	0.672247	-0.0220362	0.469282	-0.0920783	-
ENSG00000197061.5	0.528229	-0.0328469	0.772819	0.0367992	-
ENSG00000197153.5	0.0787184	0.091397	0.733291	-0.0434298	-
ENSG00000197238.5	0.724793	0.0183384	0.811914	-0.0303358	-
ENSG00000197409.8	0.0680103	0.0948525	0.741994	-0.0419607	-
ENSG00000197536.11	1.43e-48	0.664272	0.000468506	-0.424739	-
ENSG00000197837.3	0.00119139	0.167634	0.978341	0.0034618	-
ENSG00000197852.12	3.98e-16	0.405633	0.241026	-0.148667	-
ENSG00000197872.11	7.99e-24	0.490204	0.142145	-0.185541	-
ENSG00000197903.8	8.67e-07	0.252123	0.234167	-0.150832	-
ENSG00000197976.12	9.33e-18	0.425622	0.0210055	-0.28802	-
ENSG00000198223.17	5.91e-21	0.461368	0.0484939	-0.247651	-
ENSG00000198356.12	1.3e-09	0.308326	0.114853	-0.199039	-
ENSG00000198408.14	2.49e-24	0.495024	0.107084	-0.203327	-
ENSG00000198673.10	2.04e-25	0.50511	0.201367	-0.161843	-
ENSG00000202198.1	0.00422685	0.1482	0.443565	0.0974659	-
ENSG00000203709.12	1.18e-19	0.447331	0.0132085	-0.308254	-
ENSG00000203739.4	3.72e-19	0.441783	0.114551	-0.199201	-
ENSG00000203811.1	0.000409533	0.182541	0.468277	-0.0922857	-
ENSG00000203812.2	0.0306627	0.112239	0.392424	-0.108729	-
ENSG00000203814.6	5.17e-31	0.552313	0.0729239	-0.225709	-
ENSG00000203852.3	0.000409533	0.182541	0.468277	-0.0922857	-
ENSG00000204161.14	2.64e-08	0.284221	0.714806	-0.0465692	-
ENSG00000204387.14	0.0146163	0.126857	0.781019	-0.0354364	-
ENSG00000204767.4	5.72e-21	0.462074	0.0260145	-0.278214	-
ENSG00000205045.11	6.18e-10	0.314451	0.661753	-0.0557429	-
ENSG00000211751.9	2.83e-08	0.283622	0.462329	-0.0935186	-
ENSG00000213443.2	4e-07	0.259867	0.36449	-0.115249	-
ENSG00000213533.13	5.08e-20	0.451899	0.00402396	-0.354753	-
ENSG00000214756.8	0.102768	0.0849559	0.739102	0.0424481	-
ENSG00000214765.8	2.02e-06	0.244111	0.884104	0.0185858	-
ENSG00000215030.5	0.00816808	0.137322	0.218289	-0.156017	-
ENSG00000223799.1	9.21e-26	0.508838	0.0130533	-0.308752	-
ENSG00000223891.6	3.95e-13	0.365406	0.112088	-0.200539	-
ENSG00000224397.7	3.51e-22	0.474594	0.0391878	-0.258472	-
ENSG00000224870.7	1.88e-14	0.384085	0.119869	-0.196387	-
ENSG00000225342.2	2.57e-29	0.539386	0.341201	-0.12092	-
ENSG00000226752.9	4.27e-05	0.21107	0.212912	-0.157833	-
ENSG00000228242.6	3.03e-17	0.420002	0.233905	-0.150916	-
ENSG00000231365.6	2.82e-07	0.263479	0.5194	-0.0820144	-
ENSG00000231758.3	9.53e-16	0.40178	0.227938	-0.152836	-
ENSG00000233822.4	2.17e-10	0.32273	0.510582	-0.0837473	-
ENSG00000234925.2	3.45e-14	0.380934	0.211406	-0.158347	-
ENSG00000235655.3	9.99e-19	0.437984	0.165635	-0.175406	-
ENSG00000237491.10	2.07e-10	0.323081	0.548132	-0.0764672	-
ENSG00000238160.1	9.27e-21	0.460404	0.300315	-0.131498	-
ENSG00000240342.3	0.00195232	0.160739	0.769009	-0.0374338	-
ENSG00000240531.1	1.25e-18	0.436885	0.0169129	-0.29764	-
ENSG00000241468.8	1.2e-08	0.291268	0.285784	-0.135481	-
ENSG00000241837.7	0.000147628	0.196302	0.748752	-0.0408235	-
ENSG00000242086.8	3.36e-13	0.366883	0.200758	-0.162059	-
ENSG00000243317.8	2.1e-08	0.286528	0.218882	-0.155819	-
ENSG00000244198.7	0.00357657	0.151298	0.268889	-0.140283	-
ENSG00000244627.5	1.01e-13	0.374373	0.331674	-0.12331	-
ENSG00000245648.2	2.43e-05	0.217824	0.341346	-0.120884	-
ENSG00000246067.8	3.47e-10	0.31923	0.618407	-0.0634515	-
ENSG00000246705.4	0.00688887	0.140448	0.738576	-0.0425369	-
ENSG00000250687.6	1.61e-24	0.497976	0.0557037	-0.240386	-
ENSG00000250903.9	6.7e-14	0.3769	0.218512	-0.155942	-
ENSG00000253816.3	1.42e-07	0.26975	0.185131	-0.16777	-
ENSG00000255464.1	0.0646789	0.0964096	0.323839	-0.125308	-
ENSG00000256053.9	1.27e-06	0.249417	0.401362	-0.106702	-
ENSG00000257093.7	2.4e-09	0.304725	0.39495	-0.108154	-
ENSG00000261716.2	1.95e-27	0.524821	0.206683	-0.159977	-
ENSG00000262879.6	1.31e-07	0.270859	0.123416	-0.194564	-
ENSG00000263069.6	1.03e-69	0.75731	0.000777117	-0.409582	-
ENSG00000264343.6	1.08e-26	0.518334	0.00135338	-0.392108	-
ENSG00000267369.1	9.13e-12	0.345655	0.25115	-0.145548	-
ENSG00000269900.3	0.0713284	-0.0941192	0.0280712	0.274646	-
ENSG00000270170.2	2.36e-07	0.26546	0.329394	-0.123888	-
ENSG00000270276.2	1.3e-23	0.489919	0.303105	-0.130748	-
ENSG00000270882.2	4.12e-07	0.260278	0.436216	-0.0990372	-
ENSG00000271361.1	4.32e-12	0.350715	0.0918581	-0.212484	-
ENSG00000272196.2	2.74e-13	0.368636	0.0903538	-0.213451	-
ENSG00000272419.6	0.000429696	0.182627	0.0187245	-0.293161	-
ENSG00000272606.1	3.61e-06	0.238817	0.383002	0.110896	-
ENSG00000272888.7	1.53e-10	0.325711	0.567951	0.0727226	-
ENSG00000273542.2	0.294841	0.0547532	0.917257	-0.0132467	-
ENSG00000273703.2	0.0245882	0.11717	0.885473	-0.0183648	-
ENSG00000273768.1	0.00617118	-0.142512	0.0191401	0.292186	-
ENSG00000273802.2	0.000498463	0.18061	0.486169	-0.0886272	-
ENSG00000274210.1	0.896725	0.00678927	0.20724	0.159783	-
ENSG00000274290.3	0.000824743	0.173602	0.458141	-0.0943919	-
ENSG00000274452.1	0.355866	-0.048265	0.665326	-0.0551166	-
ENSG00000274536.7	1.44e-26	0.517233	0.20853	-0.159336	-
ENSG00000274618.2	0.767674	-0.0154514	0.512178	0.0834326	-
ENSG00000274641.2	0.00169411	0.1631	0.418543	-0.102878	-
ENSG00000274845.1	3.29e-05	0.214659	0.963396	0.00585183	-
ENSG00000274997.2	0.19775	0.0672938	0.946278	-0.00859185	-
ENSG00000275126.2	0.853098	0.00968522	0.876579	0.0198018	-
ENSG00000275215.1	0.593721	-0.0278976	0.162639	0.176637	-
ENSG00000275221.2	0.0344555	0.110275	0.497837	-0.0862794	-
ENSG00000275379.2	4.57e-05	0.210837	0.234848	-0.150615	-
ENSG00000275714.2	0.173722	0.0710647	0.96211	-0.00605751	-
ENSG00000276180.1	0.0824668	0.0906458	0.959922	0.00640772	-
ENSG00000276368.2	0.320042	0.051977	0.974043	-0.00414896	-
ENSG00000276410.4	0.0388546	0.107736	0.919331	-0.0129136	-
ENSG00000276903.2	0.00240011	0.157789	0.593174	-0.0680439	-
ENSG00000276966.2	0.230413	0.0626693	0.458153	0.0943894	-
ENSG00000277075.2	0.021347	0.119964	0.881018	0.0190843	-
ENSG00000277157.2	0.385171	0.0454	0.669443	-0.0543966	-
ENSG00000277224.2	7.68e-08	0.275653	0.214802	-0.157191	-
ENSG00000277739.1	0.593721	-0.0278976	0.162639	0.176637	-
ENSG00000277775.2	0.0130037	0.129366	0.630326	-0.0613102	-
ENSG00000277918.1	0.20881	-0.0656702	0.755588	0.0396766	-
ENSG00000278233.1	0.593721	-0.0278976	0.162639	0.176637	-
ENSG00000278463.2	0.0126928	0.12981	0.591218	-0.0684034	-
ENSG00000278588.2	0.0277669	0.114724	0.574689	-0.0714636	-
ENSG00000278637.2	0.225738	0.0633011	0.938513	0.00983603	-
ENSG00000278677.2	0.000312661	0.186879	0.259409	-0.143067	-
ENSG00000278705.1	0.520701	0.0335852	0.203567	0.161066	-
ENSG00000278828.1	0.0953179	0.0870809	0.212002	-0.158143	-
ENSG00000279166.1	5.19e-19	0.44177	0.0547269	-0.241324	-
ENSG00000280014.1	6.6e-08	0.277002	0.988044	-0.00191077	-
ENSG00000280071.4	1.04e-09	0.31128	0.172712	-0.172562	-
ENSG00000280614.1	0.608935	-0.026755	0.840262	-0.0256972	-
ENSG00000280800.1	0.608935	-0.026755	0.840262	-0.0256972	-
ENSG00000281181.1	0.608935	-0.026755	0.840262	-0.0256972	-
ENSG00000281379.2	2.14e-07	0.266396	0.079718	-0.220681	-
ENSG00000282939.1	0.00134647	0.166517	0.249644	-0.146007	-
ENSG00000283378.1	2.08e-07	0.266662	0.313508	-0.12799	-
ENSG00000283787.2	1.54e-19	0.447683	0.0499446	-0.246122	-
ENSG00000284930.1	4.61e-23	0.484543	0.065211	-0.231894	-
ENSG00000284931.1	0.595939	-0.0277301	0.941948	-0.00928548	-
ENSG00000284948.1	2.09e-21	0.467773	0.110411	-0.201462	-
ENSG00000285006.1	1.42e-25	0.508325	0.0121406	-0.311791	-
ENSG00000285103.2	3.12e-27	0.523061	0.00914847	-0.323376	-
ENSG00000285280.2	6.11e-11	0.332367	0.800516	0.0322117	-
ENSG00000285366.1	5.75e-22	0.473547	0.00125794	-0.394467	-
ENSG00000285723.1	0.0130809	0.129257	0.408331	0.10514	-
ENSG00000285793.1	1.18e-14	0.387826	0.209248	-0.159088	-
ENSG00000286019.1	2.92e-15	0.395921	0.0722823	-0.226203	-
ENSG00000286032.1	0.105163	0.0846015	0.91238	-0.0140305	-
ENSG00000286054.1	0.189745	0.0685107	0.619505	-0.0632534	-
ENSG00000286057.1	0.189745	0.0685107	0.619505	-0.0632534	-
ENSG00000286091.1	0.189745	0.0685107	0.619505	-0.0632534	-
ENSG00000286106.1	7.37e-06	0.23129	0.0160605	-0.299891	-
ENSG00000286149.1	0.183004	0.069565	0.718242	0.0459836	-
ENSG00000286155.1	0.183004	0.069565	0.718242	0.0459836	-
ENSG00000286219.1	1.66e-15	0.399141	0.124576	-0.193975	-
ENSG00000286267.1	0.183004	0.069565	0.718242	0.0459836	-
ENSG00000286522.2	0.0749663	0.092939	0.599118	-0.0669544	-
ENSG00000287080.2	0.0347773	0.11008	0.707159	-0.047876	-
ENSG00000287095.1	2.31e-18	0.434332	0.00664729	-0.335952	-
ENSG00000287195.1	1.06e-23	0.490764	0.00410332	-0.354042	-
ENSG00000287263.1	3.88e-40	0.617995	0.0131062	-0.308582	-
ENSG00000287387.1	6.31e-12	0.348167	0.266425	-0.141	-
ENSG00000287680.1	3.15e-19	0.444211	0.00904659	-0.323825	-
ENSG00000287736.1	3.4e-27	0.522737	0.00749454	-0.331287	-
ENSG00000287839.1	8.78e-33	0.567712	0.0442946	-0.252301	-
ENSG00000287920.1	2.97e-21	0.466185	0.0419248	-0.255087	-
ENSG00000288156.1	3.07e-15	0.395648	0.158668	-0.178294	-
ENSG00000288587.1	1.98e-09	0.306254	0.426286	-0.101184	-
ENSG00000288604.1	4.19e-16	0.406864	0.443236	-0.0975359	-
ENSG00000288634.1	6.66e-05	0.206355	0.884048	-0.0185948	-
ENSG00000101084.18	3.73e-31	0.552797	0.0531793	-0.242838	RNAInter
ENSG00000104964.15	2.19e-12	0.353437	0.162739	-0.176596	RNAInter
ENSG00000165782.11	9.23e-17	0.413575	0.0352053	-0.263766	RNAInter
ENSG00000048028.11	2.81e-10	0.319553	0.260724	-0.142677	StarBase
ENSG00000050426.16	7.13e-13	0.360714	0.342168	-0.12068	StarBase
ENSG00000063046.18	1.67e-05	0.22117	0.936326	-0.0101866	StarBase
ENSG00000085224.23	1.51e-15	0.397689	0.297755	-0.132191	StarBase
ENSG00000086504.17	4.56e-19	0.440251	0.0507267	-0.245312	StarBase and RNAct
ENSG00000089220.5	4.3e-06	0.235744	0.964643	-0.00565237	StarBase and RNAct
ENSG00000092199.18	9.8e-16	0.400129	0.482473	-0.089377	StarBase
ENSG00000096063.16	6.67e-28	0.526391	0.151215	-0.18149	StarBase
ENSG00000096384.20	7.83e-18	0.426	0.14043	-0.186328	StarBase
ENSG00000099942.13	1.1e-19	0.447127	0.011309	-0.314737	StarBase
ENSG00000105993.15	3.37e-23	0.483572	0.0248197	-0.280398	StarBase and RNAct
ENSG00000109971.14	1.12e-12	0.357802	0.445694	-0.0970135	StarBase and RNAct
ENSG00000112514.18	3.69e-12	0.350424	0.383566	-0.110766	StarBase and RNAct
ENSG00000115053.17	6.81e-12	0.346325	0.584006	-0.0697338	StarBase
ENSG00000117682.17	3.07e-16	0.407051	0.0701798	-0.227847	StarBase
ENSG00000121766.16	2.7e-08	0.283656	0.700576	-0.0490048	StarBase and RNAct
ENSG00000122406.14	0.0103653	0.132942	0.818844	0.0291983	StarBase
ENSG00000125651.14	1.8e-20	0.456213	0.00916744	-0.323292	StarBase
ENSG00000125826.21	1.36e-58	0.711869	0.00178015	-0.383113	StarBase and RNAct
ENSG00000127663.15	1.86e-15	0.397028	0.0370392	-0.26127	StarBase and RNAct
ENSG00000134717.18	1.22e-08	0.290343	0.753024	-0.0401064	StarBase
ENSG00000138071.14	2.28e-21	0.465691	0.265936	-0.141143	StarBase
ENSG00000142192.21	2.21e-14	0.38263	0.0479306	-0.248255	StarBase
ENSG00000142541.18	0.0442808	0.104494	0.925687	-0.0118931	StarBase
ENSG00000142676.14	0.100632	0.0853704	0.773898	-0.0366197	StarBase
ENSG00000143384.14	3.21e-36	0.590377	0.00173447	-0.383977	StarBase and RNAct
ENSG00000143612.21	4.21e-24	0.49286	0.436756	-0.0989212	StarBase and RNAct
ENSG00000144381.18	2.24e-15	0.395957	0.738944	-0.0424748	StarBase and RNAct
ENSG00000144468.17	7.04e-08	0.275339	0.340818	-0.121016	StarBase
ENSG00000147010.18	1.71e-18	0.434241	0.0366657	-0.261769	StarBase
ENSG00000158710.15	4.87e-19	0.440464	0.0158014	-0.300595	StarBase
ENSG00000161204.11	1.1e-14	0.386773	0.0744099	-0.224579	StarBase
ENSG00000161904.12	3.06e-20	0.453749	0.0936302	-0.21136	StarBase and RNAct
ENSG00000164031.17	0.000186401	0.19283	0.431526	0.100048	StarBase
ENSG00000164096.13	1.53e-27	0.523923	0.108629	-0.202456	StarBase
ENSG00000164327.13	1.16e-42	0.63139	0.0323483	-0.26788	StarBase
ENSG00000165178.9	5.97e-33	0.567063	0.0264853	-0.277377	StarBase
ENSG00000166439.6	1.85e-25	0.505495	0.0675332	-0.229973	StarBase
ENSG00000167526.14	0.00357207	0.150912	0.703797	0.048452	StarBase and RNAct
ENSG00000168291.13	1.22e-13	0.37228	0.197213	-0.163326	StarBase
ENSG00000168488.18	3.36e-12	0.351062	0.0436328	-0.253066	StarBase
ENSG00000170006.12	2.05e-26	0.514087	0.089446	-0.214041	StarBase
ENSG00000170027.7	2.36e-23	0.485659	0.111558	-0.200829	StarBase
ENSG00000170315.14	0.993929	-0.000396371	0.428232	-0.100761	StarBase and RNAct
ENSG00000171606.18	8.05e-15	0.388584	0.311292	-0.128572	StarBase
ENSG00000177954.14	0.461957	0.0383072	0.779231	0.0357333	StarBase
ENSG00000185624.15	2.23e-17	0.421091	0.0173144	-0.296613	StarBase and RNAct
ENSG00000187514.17	2.36e-13	0.36818	0.0836978	-0.217891	StarBase and RNAct
ENSG00000197601.13	1.13e-18	0.436305	0.722614	0.0452398	StarBase
ENSG00000198563.14	4.16e-17	0.417823	0.0617209	-0.234887	StarBase
ENSG00000198804.2	2.49e-11	0.337422	0.144221	-0.184597	StarBase
ENSG00000211459.2	0.578068	-0.029008	0.839353	-0.0258453	StarBase
ENSG00000213465.8	9.3e-09	0.292979	0.271413	-0.139553	StarBase and RNAct
ENSG00000213585.11	2.42e-15	0.396012	0.0727447	-0.225847	StarBase and RNAct
ENSG00000229807.12	0.116489	0.081855	0.843999	0.0250882	StarBase
ENSG00000242125.3	0.000521431	0.179751	0.196678	-0.163518	StarBase
ENSG00000244038.11	5.82e-11	0.332283	0.147471	-0.18314	StarBase
ENSG00000244437.1	0.000307574	0.186845	0.854671	-0.0233524	StarBase
ENSG00000267855.6	3.74e-10	0.319073	0.0307203	-0.270361	StarBase
ENSG00000000419.13	2.28e-05	0.217704	0.862622	-0.0220618	-
ENSG00000000938.13	5.23e-32	0.559355	0.00263458	-0.369795	-
ENSG00000001084.13	1.04e-11	0.342979	0.026494	-0.277362	RNAct
ENSG00000001167.14	2.02e-26	0.513554	0.100727	-0.207018	-
ENSG00000001461.17	2.7e-10	0.31987	0.327798	-0.124295	-
ENSG00000001497.18	2.39e-10	0.320769	0.313894	-0.127888	-
ENSG00000001629.10	3.78e-13	0.364757	0.283964	-0.135989	-
ENSG00000001631.16	4.25e-11	0.333241	0.350057	-0.118736	-
ENSG00000002330.14	6.29e-13	0.361515	0.335285	-0.122399	RNAct
ENSG00000002549.12	1.14e-93	0.824851	0.00333418	-0.361519	-
ENSG00000002586.20_PAR_Y	9.28e-13	0.359025	0.187255	-0.166974	RNAct
ENSG00000002822.15	2.43e-12	0.352752	0.232538	-0.151352	-
ENSG00000002834.18	2.92e-20	0.453418	0.0153553	-0.301832	-
ENSG00000002919.15	4.89e-26	0.510126	0.0120888	-0.31197	RNAct
ENSG00000003056.8	1.08e-14	0.386394	0.216504	-0.156616	-
ENSG00000003400.15	1.83e-32	0.562811	0.00956365	-0.321587	-
ENSG00000003402.20	3.91e-34	0.57509	0.0029399	-0.365968	-
ENSG00000003756.17	3.15e-23	0.483862	0.100138	-0.20737	-
ENSG00000004059.11	6.9e-17	0.41462	0.0332881	-0.266494	-
ENSG00000004142.12	4.34e-19	0.440493	0.0628669	-0.23389	RNAct
ENSG00000004455.17	1.78e-06	0.244743	0.858999	-0.0226496	RNAct
ENSG00000004487.17	1.11e-13	0.372398	0.140066	-0.186496	-
ENSG00000004534.15	4.84e-14	0.377459	0.0799	-0.220551	RNAct
ENSG00000004700.16	1.05e-07	0.271397	0.622466	-0.0627203	-
ENSG00000004766.17	9.81e-07	0.250599	0.895295	0.0167805	-
ENSG00000004779.10	1.13e-07	0.270789	0.681209	-0.0523482	RNAct
ENSG00000004897.12	3.79e-14	0.378922	0.104127	-0.205022	-
ENSG00000004939.15	0.00570602	0.143061	0.168583	-0.174211	-
ENSG00000005007.13	5.7e-21	0.460981	0.0153494	-0.301849	RNAct
ENSG00000005020.13	2.02e-20	0.455126	0.374	-0.112996	-
ENSG00000005022.6	6.41e-12	0.346287	0.387886	-0.109769	-
ENSG00000005059.16	8.63e-10	0.311101	0.794614	-0.0331856	RNAct
ENSG00000005075.15	3.76e-13	0.364782	0.597458	-0.0672582	RNAct
ENSG00000005156.12	1.42e-14	0.384772	0.060877	-0.235632	-
ENSG00000005175.10	3.85e-21	0.462766	0.991415	0.00137205	-
ENSG00000005238.20	5.94e-21	0.460788	0.0289184	-0.27324	RNAct
ENSG00000005249.13	5.91e-05	0.206689	0.192766	-0.164938	-
ENSG00000005302.19	2.3e-32	0.562049	0.221333	-0.155003	-
ENSG00000005339.15	3.63e-18	0.429925	0.0146666	-0.303803	-
ENSG00000005483.21	1.66e-25	0.505329	0.0743498	-0.224624	-
ENSG00000005700.15	3.8e-13	0.364719	0.464256	-0.0931183	-
ENSG00000005801.18	5.65e-11	0.331217	0.474007	-0.0911061	-
ENSG00000005810.18	6.41e-21	0.460444	0.0120847	-0.311984	-
ENSG00000005812.11	1.26e-18	0.435218	0.421931	-0.102134	-
ENSG00000005844.19	1.53e-19	0.445542	0.00102178	-0.401079	-
ENSG00000005889.16	4.36e-16	0.40463	0.308338	-0.129353	-
ENSG00000005893.16	1.23e-24	0.497327	0.168246	-0.174347	-
ENSG00000006007.12	2.43e-22	0.475079	0.0414673	-0.25564	-
ENSG00000006125.18	2.35e-18	0.432115	0.0580813	-0.238159	-
ENSG00000006459.11	2.37e-23	0.485067	0.301889	-0.131074	-
ENSG00000006530.18	2.84e-09	0.301812	0.382298	-0.111059	-
ENSG00000006576.16	5.91e-12	0.346834	0.90611	-0.0150388	-
ENSG00000006652.15	2.4e-17	0.420193	0.684126	-0.0518425	RNAct
ENSG00000006715.16	5.13e-14	0.377102	0.717671	-0.0460808	-
ENSG00000006744.19	1.39e-09	0.307427	0.716546	-0.0462726	RNAct
ENSG00000006831.10	2.26e-19	0.44366	0.140034	-0.186511	-
ENSG00000007129.18	2.37e-09	0.303251	0.265139	-0.141376	-
ENSG00000007168.14	1.6e-18	0.434054	0.211848	-0.158196	-
ENSG00000007202.15	2.92e-18	0.431022	0.00333729	-0.361486	-
ENSG00000007237.19	6.1e-19	0.438826	0.0111526	-0.315312	RNAct
ENSG00000007255.10	0.000719107	0.174597	0.981505	-0.00295601	RNAct
ENSG00000007312.13	0.0347626	0.109495	0.724876	0.0448556	-
ENSG00000007392.17	1.66e-12	0.355249	0.246185	-0.147067	RNAct
ENSG00000007923.16	5.12e-13	0.362826	0.138632	-0.187162	RNAct
ENSG00000008018.9	4.94e-11	0.332177	0.30421	-0.130452	-
ENSG00000008083.14	2.42e-20	0.454298	0.0262256	-0.277837	-
ENSG00000008128.23	3.67e-15	0.392642	0.0311217	-0.26974	RNAct
ENSG00000008130.15	5.41e-39	0.608124	0.00154717	-0.387748	-
ENSG00000008282.9	7.87e-10	0.311805	0.848442	0.024365	-
ENSG00000008294.21	3.94e-21	0.462659	0.157389	-0.178835	-
ENSG00000008513.16	1.4e-14	0.384853	0.195936	-0.163786	-
ENSG00000008516.17	2.35e-16	0.408009	0.0621076	-0.234549	RNAct
ENSG00000008517.18	1.03e-11	0.343043	0.547048	-0.0766739	-
ENSG00000008869.12	5.08e-19	0.439726	0.205041	-0.160549	-
ENSG00000008952.17	1.14e-06	0.249089	0.287007	-0.135141	-
ENSG00000009307.16	1.08e-12	0.358051	0.423986	-0.101685	-
ENSG00000009335.18	7.71e-17	0.414025	0.108534	-0.202509	RNAct
ENSG00000009413.16	3.67e-14	0.37912	0.71038	0.0473249	-
ENSG00000009790.15	9.39e-14	0.373421	0.20465	-0.160686	-
ENSG00000009844.16	1.84e-18	0.433332	0.356647	-0.117133	-
ENSG00000009954.11	8.83e-17	0.4133	0.205268	-0.16047	RNAct
ENSG00000010072.16	3.8e-18	0.429689	0.744766	-0.0414938	RNAct
ENSG00000010244.19	8.67e-22	0.469469	0.227869	-0.152858	-
ENSG00000010256.11	3.13e-20	0.453091	0.0953749	-0.210269	-
ENSG00000010270.14	5.57e-21	0.461085	0.145725	-0.18392	RNAct
ENSG00000010278.15	0.00176448	0.161617	0.0959698	-0.209901	RNAct
ENSG00000010292.13	1.28e-14	0.385375	0.0617401	-0.234871	-
ENSG00000010322.16	5.12e-16	0.403737	0.018766	-0.293062	RNAct
ENSG00000010327.10	2.67e-25	0.503447	0.00569804	-0.341844	-
ENSG00000010404.18	2.58e-17	0.419813	0.0387595	-0.259019	RNAct
ENSG00000010539.12	8.42e-38	0.600365	0.0021985	-0.376011	-
ENSG00000010610.10	4.01e-18	0.429421	0.109946	-0.201721	-
ENSG00000010671.16	6.17e-26	0.509225	0.0392768	-0.258359	-
ENSG00000010810.17	7.63e-13	0.360286	0.149544	-0.182222	RNAct
ENSG00000011198.10	1.18e-13	0.37204	0.431539	-0.100045	RNAct
ENSG00000011258.16	3.04e-14	0.380258	0.557239	-0.0747388	-
ENSG00000011260.14	4.33e-10	0.31634	0.642505	-0.0591397	RNAct
ENSG00000011275.19	2.2e-14	0.382192	0.0669229	-0.230472	-
ENSG00000011295.16	2.36e-13	0.367715	0.278896	-0.137415	-
ENSG00000011304.22	2.99e-16	0.406695	0.00500023	-0.346754	RNAct
ENSG00000011405.13	7.01e-11	0.329679	0.770064	0.0372581	-
ENSG00000011422.12	6.2e-32	0.558794	0.00489218	-0.347568	RNAct
ENSG00000011454.18	5.8e-15	0.390007	0.133596	-0.18954	-
ENSG00000011523.14	6.19e-24	0.490691	0.0191622	-0.292134	-
ENSG00000011600.12	2.51e-28	0.529972	0.01584	-0.30049	RNAct
ENSG00000012061.16	1.2e-13	0.371933	0.14919	-0.182378	-
ENSG00000012124.17	0.000110118	0.19916	0.795584	-0.0330253	-
ENSG00000012232.9	1.04e-17	0.424553	0.108974	-0.202262	RNAct
ENSG00000012660.14	4.13e-31	0.552455	0.1074	-0.203148	-
ENSG00000012779.11	6.16e-28	0.526683	0.0103885	-0.318225	-
ENSG00000012817.16	0.00298447	0.153555	0.732341	-0.0435904	-
ENSG00000012822.16	1.13e-18	0.43578	0.00842853	-0.326652	-
ENSG00000012983.11	8.39e-07	0.25212	0.433098	-0.0997084	-
ENSG00000013275.8	4.14e-16	0.404907	0.0776644	-0.222164	-
ENSG00000013306.16	0.003671	0.150274	0.0596779	-0.236704	RNAct
ENSG00000013364.19	3.82e-37	0.595997	0.00155232	-0.387639	-
ENSG00000013374.16	9.85e-69	0.751189	0.00148283	-0.389138	-
ENSG00000013441.16	2.65e-13	0.366985	0.907683	-0.0147858	RNAct
ENSG00000013561.18	0.0561715	0.0991031	0.215971	-0.156796	-
ENSG00000013563.14	3.76e-22	0.473162	0.00383548	-0.356493	-
ENSG00000013810.20	2.26e-15	0.39541	0.0863032	-0.216121	RNAct
ENSG00000014216.16	5.91e-19	0.438978	0.00953731	-0.321699	RNAct
ENSG00000014641.21	2.5e-09	0.302823	0.827962	-0.0277054	-
ENSG00000014824.14	1.64e-08	0.287483	0.969073	-0.00494377	-
ENSG00000014919.13	1.39e-19	0.446009	0.134746	-0.188991	-
ENSG00000015153.15	4.21e-11	0.333311	0.58609	-0.0693486	-
ENSG00000015171.20	4.83e-09	0.297555	0.393134	-0.108567	RNAct
ENSG00000015285.11	2.69e-19	0.44282	0.0674693	-0.230025	RNAct
ENSG00000015475.19	1.36e-28	0.532198	0.00197384	-0.379658	RNAct
ENSG00000015479.20	1.41e-10	0.324623	0.764336	-0.0382134	RNAct
ENSG00000015568.13	1.53e-06	0.246198	0.689572	0.0509003	-
ENSG00000015676.18	1.41e-13	0.37091	0.274068	-0.13879	-
ENSG00000017260.20	8.83e-14	0.373799	0.817934	-0.0293477	-
ENSG00000017797.13	1.11e-22	0.478473	0.0540277	-0.242003	-
ENSG00000018189.13	1.72e-16	0.409705	0.449556	-0.0961959	RNAct
ENSG00000018280.17	9.61e-18	0.424947	0.0536638	-0.24236	-
ENSG00000019582.15	2.48e-18	0.431853	0.139377	-0.186815	-
ENSG00000019995.6	3.36e-14	0.379653	0.10058	-0.207106	-
ENSG00000020922.13	4.39e-12	0.348822	0.627435	-0.061828	-
ENSG00000021355.13	3.69e-41	0.621698	0.0151833	-0.302317	-
ENSG00000021574.13	1.92e-21	0.465918	0.292954	-0.133499	RNAct
ENSG00000021776.11	1.55e-15	0.397563	0.407775	-0.105264	-
ENSG00000022567.10	9.97e-21	0.458411	0.0488111	-0.247314	-
ENSG00000022840.16	2.74e-10	0.31974	0.0908426	-0.213136	-
ENSG00000023041.11	8.05e-19	0.437456	0.0980087	-0.208652	-
ENSG00000023191.17	3.96e-19	0.440944	0.021831	-0.286276	RNAct
ENSG00000023228.14	4.12e-14	0.378423	0.31919	-0.126508	-
ENSG00000023287.13	1.04e-21	0.468664	0.250005	-0.145897	-
ENSG00000023445.16	0.00114551	0.16798	0.49149	0.0875529	-
ENSG00000023892.11	9.03e-22	0.469287	0.0133085	-0.307936	-
ENSG00000024048.11	1.22e-26	0.515487	0.0358596	-0.262863	RNAct
ENSG00000024862.18	5.48e-20	0.450453	0.147473	-0.183138	RNAct
ENSG00000025293.17	4.22e-17	0.417223	0.0528838	-0.243131	-
ENSG00000025770.19	4.6e-13	0.363509	0.0269318	-0.276595	-
ENSG00000025796.14	3.07e-13	0.366065	0.876743	0.0197753	-
ENSG00000025800.14	7.26e-20	0.449117	0.0507898	-0.245247	-
ENSG00000026025.16	2.42e-17	0.420155	0.133771	-0.189457	RNAct
ENSG00000026103.22	2.71e-43	0.63445	0.137247	-0.187809	-
ENSG00000026508.20	1.85e-20	0.455558	0.210824	-0.158546	RNAct
ENSG00000026751.17	2.44e-15	0.394991	0.00392604	-0.355648	-
ENSG00000026950.17	7.75e-33	0.56559	0.00655688	-0.33648	-
ENSG00000027075.15	4.53e-11	0.33278	0.0656706	-0.231509	-
ENSG00000027697.15	6.23e-15	0.389596	0.967032	0.00527015	-
ENSG00000028137.19	1.04e-28	0.533162	0.0033807	-0.361025	RNAct
ENSG00000028203.18	1.34e-08	0.289166	0.738304	-0.0425829	-
ENSG00000028310.18	2.73e-14	0.380888	0.135442	-0.188661	RNAct
ENSG00000028528.15	1.26e-20	0.457319	0.024347	-0.281286	-
ENSG00000028839.10	1.07e-15	0.399617	0.0125922	-0.310264	RNAct
ENSG00000029363.17	1.54e-14	0.384303	0.617504	-0.0636143	-
ENSG00000029364.12	1.75e-19	0.444912	0.0541329	-0.241901	-
ENSG00000029534.21	0.0202021	0.120387	0.799097	-0.0324457	RNAct
ENSG00000029639.11	9.27e-06	0.227616	0.692262	-0.050436	-
ENSG00000029725.17	4.09e-15	0.392025	0.497977	-0.0862515	-
ENSG00000030066.13	8.62e-14	0.373947	0.462831	-0.0934143	RNAct
ENSG00000030110.13	9.5e-29	0.533491	0.00699117	-0.333999	-
ENSG00000030419.16	1.47e-05	0.222557	0.122942	-0.194805	-
ENSG00000030582.18	3.98e-29	0.536611	0.0230487	-0.283803	-
ENSG00000031003.10	7.78e-17	0.413982	0.356783	-0.1171	-
ENSG00000031823.14	3.76e-15	0.392499	0.0472575	-0.248985	-
ENSG00000032219.19	4.67e-18	0.428641	0.578105	-0.0708278	-
ENSG00000032389.13	2.34e-09	0.303333	0.224784	-0.153865	RNAct
ENSG00000032444.17	7.97e-13	0.360002	0.0210968	-0.287824	-
ENSG00000033178.13	8.27e-10	0.311427	0.951499	-0.00775585	-
ENSG00000033327.13	8.29e-23	0.479731	0.0874496	-0.215356	-
ENSG00000033627.17	1.46e-17	0.422784	0.268421	-0.140419	-
ENSG00000033800.14	2.79e-19	0.442654	0.552545	-0.0756279	-
ENSG00000033867.16	2.51e-07	0.263527	0.898692	0.0162331	-
ENSG00000034152.19	1.19e-09	0.308651	0.108904	-0.202301	RNAct
ENSG00000034510.6	1.44e-13	0.370786	0.0691083	-0.2287	-
ENSG00000034677.13	1.75e-19	0.444913	0.539283	-0.0781602	-
ENSG00000034713.8	4.68e-09	0.297813	0.222251	-0.154699	RNAct
ENSG00000035115.22	3.08e-06	0.239173	0.626868	-0.0619297	RNAct
ENSG00000035403.18	1.16e-18	0.435646	0.00881152	-0.32488	-
ENSG00000035664.11	7.44e-14	0.374847	0.353594	-0.117873	RNAct
ENSG00000035681.9	6.41e-27	0.517931	0.540089	-0.0780054	-
ENSG00000035928.16	1.73e-12	0.354965	0.534656	-0.0790507	-
ENSG00000036054.13	4.25e-11	0.333238	0.582743	-0.0699675	-
ENSG00000036257.13	3.08e-21	0.463784	0.406096	-0.105639	-
ENSG00000036448.10	0.00126821	0.166501	0.0552806	-0.240791	-
ENSG00000036549.13	1.37e-08	0.289037	0.511025	0.0836599	RNAct
ENSG00000037474.15	1.21e-13	0.371853	0.147739	-0.183021	RNAct
ENSG00000037749.12	6.84e-16	0.402136	0.976076	0.00382392	-
ENSG00000038002.9	1.65e-08	0.287436	0.593582	-0.0679689	-
ENSG00000038219.13	7.39e-23	0.480226	0.229562	-0.15231	-
ENSG00000038274.17	5.42e-17	0.415906	0.308944	-0.129192	-
ENSG00000038382.20	1.51e-12	0.355853	0.049129	-0.246977	-
ENSG00000038427.16	6.85e-25	0.499686	0.0629212	-0.233843	-
ENSG00000038532.16	1.72e-13	0.369684	0.0245327	-0.280935	-
ENSG00000039319.17	2.25e-23	0.485291	0.770905	-0.037118	-
ENSG00000039523.20	7.28e-18	0.426371	0.0194177	-0.291544	-
ENSG00000039650.12	1.3e-14	0.385308	0.0199313	-0.290378	RNAct
ENSG00000040341.18	4.91e-19	0.439885	0.308802	-0.12923	RNAct
ENSG00000041357.16	5.14e-07	0.256821	0.4803	-0.0898193	-
ENSG00000041802.11	2.14e-11	0.338041	0.902357	-0.015643	-
ENSG00000042088.14	2.59e-10	0.32018	0.407528	-0.105319	-
ENSG00000042429.12	3.22e-17	0.418662	0.16285	-0.17655	RNAct
ENSG00000042493.16	7.18e-27	0.517501	0.100231	-0.207314	RNAct
ENSG00000042753.12	5.2e-10	0.314957	0.0308101	-0.270222	RNAct
ENSG00000042980.13	9.67e-05	0.200757	0.417857	-0.103029	-
ENSG00000043093.15	0.0103956	0.132712	0.365374	-0.115038	-
ENSG00000043143.20	2.26e-18	0.432315	0.024625	-0.280762	RNAct
ENSG00000043462.13	7.2e-33	0.565827	0.00944123	-0.322107	-
ENSG00000044115.21	1.25e-23	0.487754	0.0252597	-0.279583	-
ENSG00000044446.12	4.56e-22	0.472316	0.0232483	-0.283409	-
ENSG00000044574.8	4.23e-23	0.482615	0.0101209	-0.31929	-
ENSG00000046651.15	1.15e-11	0.342314	0.735443	0.043066	-
ENSG00000047056.16	9.3e-17	0.413026	0.121234	-0.195681	RNAct
ENSG00000047188.16	1.08e-10	0.326588	0.700617	-0.0489979	RNAct
ENSG00000047249.18	2.2e-17	0.420657	0.352138	-0.118228	-
ENSG00000047315.17	2.12e-13	0.368393	0.555207	-0.0751233	-
ENSG00000047346.12	2.4e-13	0.36761	0.946236	-0.00859854	-
ENSG00000047365.12	2.07e-17	0.420957	0.609406	-0.06508	-
ENSG00000047410.14	1.43e-20	0.456733	0.12432	-0.194105	-
ENSG00000047597.7	0.151735	0.0744672	0.57163	-0.0720343	-
ENSG00000047932.14	2.19e-09	0.303862	0.951209	-0.0078023	-
ENSG00000048052.22	5.38e-05	0.207788	0.614489	0.0641591	-
ENSG00000048342.17	1.17e-35	0.585854	0.0182459	-0.294307	-
ENSG00000048392.12	3.07e-17	0.4189	0.724898	-0.044852	-
ENSG00000048405.10	1.12e-13	0.372344	0.788197	-0.0342468	RNAct
ENSG00000048471.14	1.13e-15	0.399315	0.0318163	-0.268679	-
ENSG00000048649.13	2.45e-15	0.394962	0.541462	-0.0777421	-
ENSG00000048707.15	3e-14	0.380342	0.0741993	-0.224738	-
ENSG00000048740.18	3.88e-26	0.51103	0.0443827	-0.2522	RNAct
ENSG00000048828.17	8.63e-26	0.50791	0.0216253	-0.286705	RNAct
ENSG00000049245.13	1.87e-36	0.591344	0.0476513	-0.248557	-
ENSG00000049618.24	9.19e-15	0.387327	0.17039	-0.173485	RNAct
ENSG00000049656.14	5.15e-16	0.40371	0.031131	-0.269725	RNAct
ENSG00000049860.14	1.53e-22	0.477096	0.162299	-0.176778	RNAct
ENSG00000050130.18	3.8e-18	0.429683	0.285456	-0.135572	RNAct
ENSG00000050344.9	2.26e-14	0.382023	0.777608	0.0360029	-
ENSG00000051009.11	3.09e-16	0.406523	0.0101704	-0.319091	RNAct
ENSG00000051108.15	1.58e-19	0.445401	0.328058	-0.124228	-
ENSG00000051382.9	2.02e-18	0.43287	0.165144	-0.175607	-
ENSG00000051596.10	1.17e-05	0.225115	0.926189	0.0118125	RNAct
ENSG00000051620.11	1.47e-27	0.523465	0.0410831	-0.256108	RNAct
ENSG00000051825.15	5.66e-10	0.314309	0.838473	-0.0259889	-
ENSG00000052723.12	5.34e-12	0.347516	0.703835	-0.0484455	RNAct
ENSG00000052749.14	1.32e-14	0.385191	0.01807	-0.294734	-
ENSG00000052841.15	2.56e-15	0.394701	0.567519	-0.0728037	-
ENSG00000053254.16	6.08e-18	0.427299	0.0197178	-0.29086	RNAct
ENSG00000053371.12	5.82e-11	0.331009	0.176929	-0.170907	RNAct
ENSG00000053770.12	8.47e-13	0.359614	0.486835	-0.0884923	-
ENSG00000053900.11	7.42e-13	0.360462	0.963887	0.00577332	RNAct
ENSG00000054116.12	2.87e-23	0.484252	0.104573	-0.204764	RNAct
ENSG00000054118.15	1.62e-20	0.456159	0.0268331	-0.276767	-
ENSG00000054148.18	9.58e-07	0.25083	0.380648	-0.111442	RNAct
ENSG00000054219.11	3.69e-16	0.405548	0.398578	-0.107331	-
ENSG00000054267.22	7.12e-29	0.534526	0.121964	-0.195305	RNAct
ENSG00000054282.16	3.73e-15	0.392549	0.264031	-0.141701	-
ENSG00000054523.18	4.75e-23	0.482119	0.0231716	-0.28356	-
ENSG00000054611.14	2.28e-19	0.443633	0.0126107	-0.310202	RNAct
ENSG00000054654.19	9.31e-19	0.436737	0.0474487	-0.248777	RNAct
ENSG00000054965.11	7.9e-25	0.499108	0.000660222	-0.414542	-
ENSG00000054967.13	5.7e-23	0.481339	0.00396269	-0.355311	RNAct
ENSG00000054983.17	1.49e-27	0.523403	0.0194572	-0.291454	RNAct
ENSG00000055044.11	4.96e-05	0.208748	0.980205	0.00316385	-
ENSG00000055070.17	3.27e-21	0.463513	0.0219981	-0.28593	-
ENSG00000055130.17	1.7e-26	0.514208	0.0439511	-0.252697	-
ENSG00000055147.19	5.82e-12	0.346934	0.860443	-0.0224154	-
ENSG00000055163.20	8.33e-16	0.401037	0.0597351	-0.236652	-
ENSG00000055208.19	3.16e-23	0.483847	0.357804	-0.116853	-
ENSG00000055483.19	5.91e-14	0.376241	0.00806995	-0.328376	RNAct
ENSG00000055609.19	1.26e-20	0.457338	0.0587852	-0.237513	-
ENSG00000055917.16	1.62e-21	0.466679	0.241145	-0.14863	-
ENSG00000055950.16	2.43e-09	0.303059	0.151894	-0.181194	RNAct
ENSG00000056097.16	1.79e-15	0.396729	0.49752	-0.0863428	-
ENSG00000056586.16	1.65e-19	0.445194	0.0525044	-0.243509	-
ENSG00000057252.13	4.78e-20	0.451098	0.0733992	-0.225346	-
ENSG00000057608.17	1.9e-14	0.383066	0.173084	-0.172415	-
ENSG00000057657.17	1.16e-25	0.506766	0.224998	-0.153795	-
ENSG00000057663.16	5.31e-09	0.29679	0.747306	0.0410665	-
ENSG00000057704.13	1.45e-19	0.445794	0.0640802	-0.232849	-
ENSG00000057757.10	0.305825	0.0532346	0.472444	-0.091427	RNAct
ENSG00000058091.17	1.62e-05	0.221497	0.929201	0.0113292	-
ENSG00000058262.10	1.49e-18	0.434389	0.0400237	-0.257418	-
ENSG00000058272.19	3.25e-22	0.473798	0.665337	-0.0551147	-
ENSG00000058600.16	5.4e-11	0.331536	0.282796	-0.136316	RNAct
ENSG00000058668.15	1.52e-17	0.422589	0.00796339	-0.328901	-
ENSG00000058673.17	3.55e-20	0.452502	0.466139	-0.0927279	-
ENSG00000058799.15	4.31e-30	0.544427	0.0462739	-0.250066	-
ENSG00000059145.19	2.11e-13	0.368406	0.0902138	-0.213542	RNAct
ENSG00000059377.18	3.31e-23	0.483652	0.0295208	-0.272262	-
ENSG00000059378.13	1.31e-125	0.886085	0.0015226	-0.388273	-
ENSG00000059588.10	1.4e-09	0.307378	0.484917	-0.0888808	RNAct
ENSG00000059728.11	8.43e-35	0.579848	0.0125888	-0.310275	-
ENSG00000059758.8	7.49e-45	0.643393	0.00920579	-0.323125	RNAct
ENSG00000059804.16	4.83e-28	0.527582	0.0237661	-0.282398	-
ENSG00000060069.17	7.65e-19	0.437708	0.0229041	-0.284091	RNAct
ENSG00000060138.13	8.97e-05	0.201667	0.0547117	-0.241339	RNAct
ENSG00000060237.18	3.28e-16	0.406187	0.0200644	-0.29008	RNAct
ENSG00000060339.14	4.99e-13	0.362997	0.536558	-0.0786842	-
ENSG00000060491.16	8.66e-39	0.606808	0.00344549	-0.360348	RNAct
ENSG00000060688.13	6.82e-14	0.375372	0.414318	-0.10381	-
ENSG00000061273.18	2.77e-15	0.394259	0.00505546	-0.346344	-
ENSG00000061936.10	2.21e-16	0.408354	0.150226	-0.181923	-
ENSG00000061987.16	5.2e-17	0.416123	0.672094	-0.053934	-
ENSG00000062194.16	1.66e-20	0.456051	0.697525	-0.0495293	-
ENSG00000062282.15	3.55e-20	0.4525	0.0636579	-0.23321	RNAct
ENSG00000062485.19	5.3e-17	0.416022	0.0551173	-0.240948	-
ENSG00000062582.14	7.9e-09	0.293564	0.358785	-0.116617	RNAct
ENSG00000062598.18	1.9e-25	0.504797	0.00234877	-0.373753	-
ENSG00000062650.19	1.37e-18	0.434819	0.400802	-0.106828	-
ENSG00000062716.13	1.3e-26	0.515251	0.0835181	-0.218015	-
ENSG00000062725.10	6.97e-14	0.375243	0.629711	-0.0614203	-
ENSG00000063177.13	0.00734173	0.138794	0.703309	-0.0485357	RNAct
ENSG00000063854.13	0.586636	0.0282799	0.836531	-0.0263056	RNAct
ENSG00000063978.16	4.82e-15	0.391076	0.0673023	-0.230161	RNAct
ENSG00000064012.22	8.14e-26	0.508138	0.114942	-0.198991	-
ENSG00000064115.11	4.31e-14	0.378158	0.361896	-0.115869	RNAct
ENSG00000064201.16	7.8e-14	0.374556	0.0064749	-0.336965	RNAct
ENSG00000064225.12	1.37e-17	0.423097	0.684267	0.051818	-
ENSG00000064313.12	3.98e-15	0.392178	0.476799	-0.0905341	-
ENSG00000064419.13	4.67e-25	0.50122	0.0571932	-0.238982	-
ENSG00000064490.14	7.4e-20	0.449024	0.0791135	-0.221114	RNAct
ENSG00000064547.14	8.44e-19	0.437222	0.0102613	-0.318728	RNAct
ENSG00000064607.17	4.34e-14	0.378119	0.0730745	-0.225594	-
ENSG00000064666.15	2.71e-20	0.453761	0.0324523	-0.267725	-
ENSG00000064687.13	7.33e-20	0.449067	0.0275684	-0.275498	-
ENSG00000064726.10	1.44e-13	0.370776	0.600312	-0.0667363	RNAct
ENSG00000064763.11	3.26e-27	0.520486	0.0628282	-0.233923	-
ENSG00000064932.16	2.11e-21	0.465484	0.00637931	-0.337536	RNAct
ENSG00000065135.12	1.01e-22	0.478875	0.247328	-0.146716	-
ENSG00000065150.21	7.98e-08	0.273881	0.800698	-0.0321817	-
ENSG00000065154.12	6.66e-10	0.31308	0.678944	0.0527416	-
ENSG00000065243.20	1.38e-21	0.467395	0.730878	-0.0438381	-
ENSG00000065357.20	4.17e-10	0.316606	0.150878	-0.181637	-
ENSG00000065413.20	3.53e-21	0.463155	0.104306	-0.204919	RNAct
ENSG00000065457.10	2.13e-13	0.368366	0.221763	-0.154861	-
ENSG00000065518.8	3.89e-11	0.333857	0.303992	-0.13051	-
ENSG00000065526.12	3.09e-21	0.46377	0.103399	-0.205445	-
ENSG00000065534.19	2.39e-08	0.284323	0.044178	-0.252435	-
ENSG00000065548.18	8.01e-08	0.273851	0.858577	-0.022718	-
ENSG00000065559.15	9.57e-17	0.412868	0.446891	-0.0967597	-
ENSG00000065613.15	8.11e-18	0.425823	0.719035	-0.0458486	-
ENSG00000065615.14	2.06e-19	0.444108	0.735673	0.0430271	RNAct
ENSG00000065675.15	8.02e-12	0.344774	0.185942	-0.167465	-
ENSG00000065809.13	1.15e-14	0.386005	0.45548	-0.0949492	RNAct
ENSG00000065882.16	4.75e-26	0.510242	0.00188067	-0.38128	-
ENSG00000065883.16	2.29e-17	0.42045	0.217584	-0.156253	RNAct
ENSG00000065911.13	9.34e-22	0.469137	0.0674361	-0.230052	-
ENSG00000065978.19	9.22e-05	0.201339	0.155645	-0.179577	RNAct
ENSG00000066027.12	2.4e-22	0.475131	0.235943	-0.150267	RNAct
ENSG00000066084.13	8.71e-42	0.625505	0.00549616	-0.343207	-
ENSG00000066117.15	5.02e-15	0.390839	0.137481	-0.187699	-
ENSG00000066135.13	1.06e-16	0.412311	0.0534591	-0.242561	-
ENSG00000066136.20	3.45e-18	0.430176	0.0647832	-0.232254	RNAct
ENSG00000066294.15	2.25e-12	0.353267	0.261015	-0.14259	-
ENSG00000066322.15	1.3e-19	0.446344	0.00804284	-0.328509	-
ENSG00000066336.12	1.71e-12	0.355072	0.0431145	-0.253673	RNAct
ENSG00000066422.5	3.47e-15	0.392968	0.660326	-0.0559934	-
ENSG00000066654.14	1.06e-11	0.342887	0.246333	-0.147021	-
ENSG00000066739.12	7.09e-17	0.414478	0.13926	-0.18687	-
ENSG00000066777.9	1.86e-19	0.444613	0.457964	-0.0944291	-
ENSG00000066855.16	3.08e-08	0.282163	0.703867	0.0484401	-
ENSG00000066926.12	0.166105	0.0719491	0.0857474	-0.216495	-
ENSG00000066933.16	1.98e-07	0.265683	0.682782	0.0520755	RNAct
ENSG00000067048.17	0.000272445	0.187686	0.92218	-0.012456	-
ENSG00000067057.18	1.84e-14	0.383229	0.239376	-0.149184	RNAct
ENSG00000067064.11	8.32e-15	0.387911	0.961799	0.00610733	RNAct
ENSG00000067066.17	2.78e-74	0.770267	0.00196822	-0.379754	RNAct
ENSG00000067082.15	4.91e-25	0.501022	0.116648	-0.19808	RNAct
ENSG00000067167.8	3.61e-11	0.334385	0.509428	-0.0839754	-
ENSG00000067182.8	2.03e-30	0.547031	0.00777675	-0.329836	RNAct
ENSG00000067208.14	2.25e-17	0.420528	0.288945	-0.134603	-
ENSG00000067365.15	1.27e-16	0.411364	0.0231717	-0.28356	-
ENSG00000067369.14	1.54e-13	0.370366	0.0877808	-0.215136	-
ENSG00000067560.13	7.65e-23	0.480076	0.0331067	-0.266759	RNAct
ENSG00000067596.12	1.5e-21	0.467029	0.050505	-0.245541	-
ENSG00000067704.10	2.84e-13	0.366557	0.345929	-0.11975	-
ENSG00000067829.19	3.61e-18	0.429954	0.0690141	-0.228775	RNAct
ENSG00000067836.13	2.63e-09	0.302411	0.0129803	-0.308989	RNAct
ENSG00000067900.8	2.91e-21	0.46404	0.825245	-0.0281499	-
ENSG00000067955.15	7.61e-19	0.437733	0.11122	-0.201016	RNAct
ENSG00000067992.16	3.81e-23	0.483054	0.527065	-0.08052	RNAct
ENSG00000068024.17	7.42e-19	0.437857	0.0137295	-0.306617	RNAct
ENSG00000068028.17	5.74e-14	0.376426	0.0278503	-0.275019	RNAct
ENSG00000068079.8	6.2e-118	0.873856	0.00198429	-0.37948	-
ENSG00000068305.17	1.9e-33	0.570103	0.160225	-0.177641	RNAct
ENSG00000068308.14	5.19e-23	0.481739	0.0166136	-0.298419	RNAct
ENSG00000068323.17	1.46e-20	0.456663	0.0112802	-0.314842	-
ENSG00000068366.20	3.6e-37	0.596171	0.147725	-0.183026	-
ENSG00000068400.13	6.01e-30	0.543266	0.000460376	-0.425251	-
ENSG00000068650.18	1.04e-22	0.478741	0.0288268	-0.273391	-
ENSG00000068697.7	3.75e-24	0.49276	0.205036	-0.160551	-
ENSG00000068724.17	5.98e-21	0.460762	0.100661	-0.207058	RNAct
ENSG00000068745.15	6.95e-22	0.470452	0.0216757	-0.2866	-
ENSG00000068784.13	6.39e-40	0.614016	0.15899	-0.178159	-
ENSG00000068796.19	6.86e-14	0.375336	0.593826	-0.0679242	RNAct
ENSG00000068878.15	2e-15	0.396117	0.215957	-0.1568	-
ENSG00000069248.12	4.35e-11	0.333079	0.304227	-0.130448	-
ENSG00000069275.13	0.00053319	0.178728	0.717488	0.0461119	-
ENSG00000069329.18	7.22e-14	0.375031	0.492489	-0.0873518	-
ENSG00000069345.12	8.71e-12	0.344218	0.547687	-0.0765522	-
ENSG00000069424.15	1.15e-13	0.372186	0.0532465	-0.242771	RNAct
ENSG00000069493.15	8.1e-08	0.273747	0.893468	-0.0170749	-
ENSG00000069667.16	2.4e-06	0.241712	0.862674	-0.0220534	RNAct
ENSG00000069943.10	1.67e-20	0.456029	0.059163	-0.237169	-
ENSG00000069974.16	5.34e-23	0.481618	0.443762	-0.0974241	-
ENSG00000070010.19	2.74e-17	0.419511	0.0953677	-0.210274	RNAct
ENSG00000070061.16	1.14e-09	0.308966	0.302802	-0.130829	-
ENSG00000070190.13	1.33e-67	0.74708	0.0193806	-0.29163	-
ENSG00000070269.14	1.71e-22	0.476601	0.216948	-0.156467	RNAct
ENSG00000070367.16	2.49e-14	0.381438	0.982684	0.0027675	-
ENSG00000070413.20	2.75e-25	0.503342	0.017162	-0.297	-
ENSG00000070476.15	3.65e-17	0.417996	0.0730606	-0.225605	RNAct
ENSG00000070495.15	9.1e-17	0.413141	0.124693	-0.193916	RNAct
ENSG00000070501.12	2.36e-33	0.569407	0.114409	-0.199278	-
ENSG00000070540.13	8.73e-17	0.413364	0.0248629	-0.280317	RNAct
ENSG00000070610.14	2.57e-20	0.454018	0.00380634	-0.356769	-
ENSG00000070731.11	5.13e-20	0.450759	0.0785729	-0.221504	RNAct
ENSG00000070756.17	3.54e-16	0.405777	0.215408	-0.156986	-
ENSG00000070761.8	2.31e-09	0.30346	0.251219	-0.145527	-
ENSG00000070831.17	2.16e-14	0.382297	0.445402	-0.0970755	-
ENSG00000070961.16	1.3e-17	0.42337	0.324659	-0.125097	-
ENSG00000071051.14	1.35e-16	0.411023	0.143048	-0.185129	RNAct
ENSG00000071054.16	8.31e-24	0.489462	0.037886	-0.260151	RNAct
ENSG00000071073.13	6.61e-06	0.231219	0.972579	0.00438314	-
ENSG00000071082.11	0.16051	0.0729092	0.814686	-0.0298805	RNAct
ENSG00000071127.17	1.76e-17	0.421825	0.0333345	-0.266427	RNAct
ENSG00000071189.21	7.32e-23	0.480265	0.233504	-0.151043	-
ENSG00000071243.16	6.23e-15	0.389595	0.789074	-0.0341016	-
ENSG00000071462.12	9.92e-12	0.343327	0.0979135	-0.20871	RNAct
ENSG00000071537.14	8.72e-21	0.45903	0.0328862	-0.267082	RNAct
ENSG00000071553.18	7.38e-17	0.414259	0.0298702	-0.271701	RNAct
ENSG00000071575.11	2.22e-09	0.303757	0.247517	-0.146658	-
ENSG00000071655.18	2.12e-11	0.338096	0.291573	-0.133879	RNAct
ENSG00000071859.15	1.47e-20	0.456611	0.0300824	-0.271364	RNAct
ENSG00000071967.12	2.37e-10	0.320819	0.740394	-0.0422302	-
ENSG00000072042.13	4.77e-14	0.377548	0.133597	-0.18954	-
ENSG00000072062.15	4.04e-14	0.378547	0.051394	-0.244629	RNAct
ENSG00000072110.15	5.17e-20	0.450725	0.0279226	-0.274897	-
ENSG00000072121.17	1.06e-31	0.557023	0.0074995	-0.331261	-
ENSG00000072135.13	5.48e-19	0.439348	0.003259	-0.36233	RNAct
ENSG00000072210.19	3.85e-13	0.364633	0.262785	-0.142068	RNAct
ENSG00000072274.13	1.35e-07	0.269173	0.599987	-0.0667956	-
ENSG00000072364.13	1.47e-22	0.477274	0.0602966	-0.236148	-
ENSG00000072401.15	1.3e-23	0.487589	0.177255	-0.170781	-
ENSG00000072501.19	1.82e-16	0.409408	0.0166917	-0.298214	-
ENSG00000072506.13	9.83e-12	0.343393	0.162122	-0.176851	RNAct
ENSG00000072518.21	4.89e-18	0.428407	0.0115244	-0.313957	RNAct
ENSG00000072609.18	8.95e-20	0.448121	0.0137876	-0.306438	-
ENSG00000072694.21	5.61e-13	0.36225	0.139708	-0.186662	-
ENSG00000072736.19	2.27e-13	0.367969	0.0297383	-0.271912	-
ENSG00000072756.17	6.16e-14	0.375989	0.75666	-0.039497	RNAct
ENSG00000072778.20	1.75e-19	0.444907	0.00588867	-0.340595	RNAct
ENSG00000072786.13	4.5e-18	0.428835	0.00977785	-0.320691	-
ENSG00000072803.17	8.97e-17	0.413217	0.261341	-0.142494	RNAct
ENSG00000072818.12	3.09e-16	0.406511	0.0180302	-0.294832	RNAct
ENSG00000072849.11	1.39e-17	0.423047	0.0998014	-0.207571	-
ENSG00000072858.11	1.54e-12	0.355727	0.111598	-0.200807	-
ENSG00000072864.16	3.97e-18	0.429463	0.0111766	-0.315223	-
ENSG00000072958.9	9.9e-17	0.412687	0.0637511	-0.23313	-
ENSG00000073331.18	8.84e-37	0.593548	0.00414475	-0.353676	-
ENSG00000073578.17	7.78e-17	0.41398	0.150934	-0.181613	RNAct
ENSG00000073584.20	7.46e-13	0.36043	0.513619	-0.0831488	-
ENSG00000073605.18	1.8e-09	0.305396	0.0339579	-0.265526	-
ENSG00000073614.13	4.97e-22	0.471931	0.0286232	-0.273726	-
ENSG00000073737.17	2.97e-48	0.661943	0.102658	-0.205878	-
ENSG00000073756.12	1.49e-19	0.445682	0.377056	-0.11228	-
ENSG00000073849.16	3.17e-11	0.335304	0.0966683	-0.209471	-
ENSG00000073910.22	1.92e-19	0.444456	0.06402	-0.232901	-
ENSG00000073921.18	3.36e-27	0.520371	0.183287	-0.168466	RNAct
ENSG00000073969.18	9.56e-14	0.373313	0.18923	-0.166239	-
ENSG00000074054.20	2.27e-16	0.40821	0.168455	-0.174263	-
ENSG00000074071.15	1.17e-11	0.342183	0.260327	-0.142794	RNAct
ENSG00000074201.9	2.22e-10	0.321305	0.335575	-0.122326	-
ENSG00000074266.22	9.95e-11	0.327166	0.891501	0.0173922	RNAct
ENSG00000074319.13	1.44e-21	0.467218	0.0295826	-0.272162	RNAct
ENSG00000074356.17	5.08e-13	0.362888	0.0745313	-0.224487	-
ENSG00000074370.18	9.14e-14	0.373584	0.0418974	-0.25512	-
ENSG00000074603.19	7.4e-17	0.414246	0.588991	-0.0688134	-
ENSG00000074660.16	3.5e-26	0.511428	0.00253987	-0.371062	-
ENSG00000074695.6	8.87e-09	0.292615	0.575235	-0.0713619	-
ENSG00000074706.13	5.39e-18	0.427911	0.202735	-0.161359	-
ENSG00000074755.15	1.97e-19	0.444331	0.00407557	-0.35429	-
ENSG00000074800.16	2.35e-14	0.381797	0.0662892	-0.230995	-
ENSG00000074966.11	4.63e-07	0.257806	0.177806	-0.170567	-
ENSG00000075089.9	0.00135079	0.165578	0.536718	-0.0786534	-
ENSG00000075142.14	1.07e-16	0.412273	0.304948	-0.130255	RNAct
ENSG00000075234.17	3.05e-08	0.282241	0.00315372	-0.363494	-
ENSG00000075239.14	2.13e-10	0.321596	0.491785	-0.0874935	RNAct
ENSG00000075240.17	2.05e-11	0.338349	0.404976	-0.10589	-
ENSG00000075292.19	1.18e-16	0.411748	0.529933	-0.0799636	-
ENSG00000075303.13	9.9e-11	0.3272	0.964867	-0.00561658	-
ENSG00000075413.19	3.75e-23	0.483121	0.00488463	-0.347625	RNAct
ENSG00000075415.13	6.76e-14	0.375429	0.226605	-0.15327	RNAct
ENSG00000075420.13	1.04e-34	0.579205	0.00663132	-0.336045	RNAct
ENSG00000075426.12	3.47e-23	0.483456	0.0300483	-0.271418	-
ENSG00000075539.15	7.12e-17	0.414455	0.220323	-0.155338	-
ENSG00000075568.17	1.82e-20	0.45563	0.106069	-0.203905	-
ENSG00000075624.17	1.98e-17	0.421206	0.0485909	-0.247548	-
ENSG00000075711.21	1.49e-08	0.288315	0.853112	-0.0236057	-
ENSG00000075785.14	3.1e-17	0.41885	0.132678	-0.189981	RNAct
ENSG00000075856.12	3.48e-14	0.379441	0.096154	-0.209787	RNAct
ENSG00000075884.14	1.27e-15	0.398659	0.701737	-0.0488054	-
ENSG00000075914.13	7.38e-09	0.29412	0.122325	-0.19512	-
ENSG00000075975.17	4.07e-21	0.462513	0.0775176	-0.222271	-
ENSG00000076043.11	2.82e-05	0.215289	0.785859	-0.0346339	RNAct
ENSG00000076108.12	3.16e-23	0.48385	0.00769691	-0.330242	-
ENSG00000076242.16	8.24e-14	0.374218	0.159309	-0.178025	-
ENSG00000076321.11	3.04e-10	0.318985	0.875836	-0.019922	-
ENSG00000076513.17	3.91e-29	0.536674	0.011791	-0.313008	-
ENSG00000076641.4	1.02e-15	0.399913	0.362145	-0.115809	-
ENSG00000076662.10	1.21e-17	0.423772	0.113245	-0.199908	-
ENSG00000076685.19	9.72e-39	0.606487	0.0157671	-0.300689	RNAct
ENSG00000076770.14	0.0303841	0.112275	0.0272307	-0.276077	RNAct
ENSG00000076928.18	2.35e-13	0.367738	0.0176146	-0.295858	-
ENSG00000076944.16	5.18e-19	0.439624	0.0182777	-0.29423	RNAct
ENSG00000076984.18	1.81e-11	0.339207	0.0283244	-0.274223	-
ENSG00000077044.11	1.63e-12	0.355377	0.06845	-0.229229	-
ENSG00000077097.15	3.96e-12	0.349518	0.738923	-0.0424785	RNAct
ENSG00000077147.16	1.67e-12	0.355229	0.884155	-0.0185776	RNAct
ENSG00000077150.20	1.62e-24	0.496206	0.000595945	-0.417621	-
ENSG00000077157.22	1.98e-17	0.421197	0.107578	-0.203047	RNAct
ENSG00000077232.18	5.84e-07	0.255593	0.673827	0.0536319	-
ENSG00000077238.14	1.86e-25	0.504895	0.0135547	-0.30716	-
ENSG00000077254.14	3.3e-23	0.483673	0.36076	-0.116141	-
ENSG00000077380.16	5.62e-14	0.376548	0.447111	-0.0967131	-
ENSG00000077420.16	6.12e-27	0.518108	0.0171689	-0.296982	RNAct
ENSG00000077454.16	1.12e-18	0.435808	0.0379569	-0.260059	RNAct
ENSG00000077458.13	3e-15	0.393805	0.68927	-0.0509525	RNAct
ENSG00000077549.19	1.37e-15	0.398262	0.0357345	-0.263035	RNAct
ENSG00000077684.16	1.26e-17	0.423557	0.181713	-0.169065	-
ENSG00000077984.6	4.91e-16	0.403968	0.012594	-0.310258	-
ENSG00000078043.16	1.22e-09	0.308414	0.749066	-0.0407709	RNAct
ENSG00000078070.13	8.64e-07	0.251829	0.961367	-0.00617649	-
ENSG00000078140.14	1.67e-18	0.433815	0.51997	-0.0819029	RNAct
ENSG00000078142.13	2.33e-19	0.443525	0.35851	-0.116683	-
ENSG00000078304.19	1.62e-20	0.456153	0.130363	-0.191103	-
ENSG00000078319.10	2.16e-11	0.337989	0.339081	-0.121448	RNAct
ENSG00000078369.18	2.55e-24	0.49435	0.0167522	-0.298057	RNAct
ENSG00000078403.17	1.24e-09	0.308306	0.63269	-0.0608875	RNAct
ENSG00000078589.13	1.46e-06	0.246677	0.662258	-0.0556542	-
ENSG00000078596.11	0.0343946	0.109717	0.286308	-0.135335	-
ENSG00000078618.22	2.5e-29	0.538264	0.0218269	-0.286285	-
ENSG00000078668.14	7.99e-12	0.344799	0.487353	-0.0883876	-
ENSG00000078674.18	8.88e-13	0.359306	0.921528	-0.0125607	-
ENSG00000078747.16	3.4e-16	0.405998	0.182368	-0.168816	-
ENSG00000078808.19	2.02e-15	0.39605	0.025763	-0.278667	RNAct
ENSG00000078902.16	2.53e-11	0.33688	0.0262515	-0.277791	RNAct
ENSG00000079134.12	2.17e-08	0.285136	0.83469	-0.026606	-
ENSG00000079246.16	1.1e-17	0.424263	0.695978	-0.0497956	-
ENSG00000079263.19	6.94e-68	0.748112	0.0304067	-0.270852	-
ENSG00000079277.22	1.63e-22	0.476808	0.0155531	-0.30128	-
ENSG00000079308.19	1.77e-05	0.220504	0.124538	-0.193995	-
ENSG00000079332.15	4.17e-17	0.417293	0.370444	-0.113834	-
ENSG00000079335.20	2.86e-10	0.319423	0.327553	-0.124357	RNAct
ENSG00000079459.13	2.87e-16	0.406917	0.275881	-0.138272	RNAct
ENSG00000079616.13	1.66e-09	0.306027	0.103614	-0.20532	RNAct
ENSG00000079739.17	1.14e-14	0.386063	0.201937	-0.161641	RNAct
ENSG00000079805.18	2.11e-17	0.42088	0.0766578	-0.222902	RNAct
ENSG00000079950.14	1.84e-18	0.433335	0.97041	-0.00472998	RNAct
ENSG00000080189.15	1.09e-17	0.424291	0.0243005	-0.281374	-
ENSG00000080345.18	1.85e-24	0.495659	0.203385	-0.16113	-
ENSG00000080371.6	1.81e-22	0.476347	0.0884036	-0.214725	-
ENSG00000080503.24	8.27e-16	0.40108	0.0563499	-0.239773	-
ENSG00000080546.13	7.48e-06	0.229912	0.974171	0.00412848	-
ENSG00000080815.19	4.59e-23	0.48226	0.0262174	-0.277852	RNAct
ENSG00000080819.9	9.98e-12	0.343288	0.149589	-0.182203	RNAct
ENSG00000080824.19	3.97e-12	0.349496	0.445498	-0.0970551	-
ENSG00000080839.12	1.73e-07	0.26691	0.363696	-0.115438	-
ENSG00000080947.15	1.29e-05	0.224012	0.819849	-0.0290336	RNAct
ENSG00000081019.13	3.49e-21	0.463216	0.264126	-0.141673	-
ENSG00000081059.20	1.12e-10	0.326276	0.163806	-0.176156	RNAct
ENSG00000081087.15	5.33e-21	0.461281	0.252214	-0.145226	RNAct
ENSG00000081154.12	5.49e-11	0.331428	0.767648	-0.0376608	-
ENSG00000081189.16	8.92e-11	0.327954	0.77815	-0.0359128	-
ENSG00000081237.20	9.94e-25	0.498178	0.160096	-0.177695	-
ENSG00000081307.14	3.97e-08	0.279992	0.508016	-0.0842545	RNAct
ENSG00000081320.11	6.47e-16	0.402448	0.668684	0.0545292	-
ENSG00000081665.14	1.88e-13	0.369121	0.92017	-0.0127788	-
ENSG00000081721.12	6.82e-11	0.329874	0.250587	-0.145719	-
ENSG00000082068.9	2.79e-10	0.319626	0.296639	-0.132494	-
ENSG00000082074.19	9.35e-39	0.606594	0.104788	-0.20464	-
ENSG00000082146.13	0.839485	0.010537	0.69242	-0.0504086	RNAct
ENSG00000082153.18	7.01e-12	0.345683	0.879704	-0.0192967	RNAct
ENSG00000082212.13	1.24e-26	0.515431	0.112331	-0.200406	RNAct
ENSG00000082213.18	4.76e-09	0.297684	0.37619	-0.112483	-
ENSG00000082258.13	8.79e-12	0.344156	0.710434	-0.0473157	-
ENSG00000082397.17	7.82e-26	0.508298	0.0152111	-0.302238	-
ENSG00000082512.15	7.72e-07	0.252923	0.952112	0.00765764	-
ENSG00000082641.16	6.88e-20	0.449371	0.00943221	-0.322146	RNAct
ENSG00000082701.17	8.73e-21	0.459023	0.0192717	-0.291881	-
ENSG00000082805.20	8.6e-13	0.359517	0.111407	-0.200913	-
ENSG00000082898.18	1.66e-18	0.433873	0.296308	-0.132584	-
ENSG00000082996.20	2.5e-27	0.521481	0.163345	-0.176345	-
ENSG00000083168.11	1.35e-25	0.506159	0.0241983	-0.281569	-
ENSG00000083312.17	8.53e-14	0.374007	0.720826	-0.0455438	-
ENSG00000083457.12	2.99e-08	0.282426	0.755299	-0.039725	-
ENSG00000083520.15	1.7e-11	0.339632	0.759886	-0.0389571	-
ENSG00000083535.16	8.91e-06	0.228034	0.566609	0.0729742	-
ENSG00000083642.19	8e-16	0.401261	0.801191	-0.0321003	-
ENSG00000083799.18	5.68e-22	0.471348	0.390837	-0.109092	-
ENSG00000083814.13	7.91e-09	0.293552	0.776225	0.0362327	-
ENSG00000083828.16	5.51e-22	0.471481	0.0632386	-0.233569	-
ENSG00000083844.10	1.33e-13	0.371266	0.198655	-0.162808	RNAct
ENSG00000083845.9	0.0598913	0.0976514	0.79278	0.0334885	-
ENSG00000083896.13	8.22e-15	0.387982	0.692984	-0.0503114	-
ENSG00000083937.10	4.23e-24	0.492265	0.294465	-0.133086	-
ENSG00000084070.12	1.75e-21	0.46634	0.0676939	-0.229842	-
ENSG00000084072.17	5.09e-11	0.331968	0.105093	-0.204464	RNAct
ENSG00000084073.10	3.21e-17	0.418679	0.790314	-0.0338965	-
ENSG00000084090.13	1.3e-14	0.385283	0.236453	-0.150106	-
ENSG00000084110.11	5.23e-17	0.416095	0.24741	-0.14669	-
ENSG00000084234.18	4.44e-23	0.48241	0.00857966	-0.325944	RNAct
ENSG00000084623.12	4.26e-10	0.316445	0.239523	-0.149138	-
ENSG00000084676.15	1.36e-23	0.487403	0.0218131	-0.286313	-
ENSG00000084733.11	4.21e-31	0.552391	0.00874476	-0.325184	-
ENSG00000084754.12	3.49e-16	0.405859	0.198195	-0.162973	-
ENSG00000085063.17	2.98e-32	0.561208	0.0678605	-0.229706	-
ENSG00000085117.12	4.08e-17	0.417403	0.14845	-0.182705	RNAct
ENSG00000085265.11	1.48e-31	0.555907	0.0241191	-0.281719	-
ENSG00000085365.18	2.74e-13	0.366774	0.716264	-0.0463206	-
ENSG00000085415.16	4.94e-08	0.278087	0.438582	-0.0985297	RNAct
ENSG00000085449.15	8.06e-43	0.631668	0.0173996	-0.296397	-
ENSG00000085491.17	4.32e-15	0.391704	0.587625	-0.0690654	RNAct
ENSG00000085511.20	1.07e-07	0.271247	0.606484	-0.065611	-
ENSG00000085514.16	2.83e-13	0.366578	0.11606	-0.198393	-
ENSG00000085662.14	4.66e-09	0.297854	0.881591	-0.0189917	-
ENSG00000085719.13	5.41e-06	0.233342	0.650495	-0.0577248	-
ENSG00000085788.14	6.37e-08	0.275866	0.940163	0.00957149	-
ENSG00000085832.17	4.01e-21	0.462579	0.0585825	-0.237698	-
ENSG00000085978.22	1.46e-12	0.356095	0.161847	-0.176965	-
ENSG00000086061.16	2.41e-21	0.464883	0.193132	-0.164804	-
ENSG00000086062.13	2.66e-20	0.453852	0.0149342	-0.303028	RNAct
ENSG00000086065.14	6.27e-36	0.587737	0.0348305	-0.264289	-
ENSG00000086232.13	1.34e-06	0.247563	0.0243642	-0.281253	-
ENSG00000086300.16	2.33e-30	0.546545	0.186451	-0.167275	RNAct
ENSG00000086589.12	2.4e-23	0.485013	0.081752	-0.219242	-
ENSG00000086598.11	1.94e-12	0.354227	0.905785	-0.0150912	RNAct
ENSG00000086666.19	1.14e-12	0.357721	0.99526	-0.000757494	RNAct
ENSG00000086730.17	5.45e-24	0.491215	0.0898219	-0.213797	-
ENSG00000086758.16	2.96e-16	0.406749	0.0388504	-0.258903	-
ENSG00000087074.8	4.31e-21	0.462259	0.0661801	-0.231086	-
ENSG00000087086.15	3.3e-13	0.365616	0.00846694	-0.326471	-
ENSG00000087087.20	3.12e-12	0.351107	0.170306	-0.173519	-
ENSG00000087111.21	5.03e-10	0.315208	0.0788003	-0.22134	-
ENSG00000087152.15	5.06e-18	0.428236	0.0249833	-0.280094	-
ENSG00000087157.19	2.82e-29	0.537826	0.0015676	-0.387317	RNAct
ENSG00000087191.13	1.23e-15	0.398857	0.139823	-0.186609	-
ENSG00000087206.17	5.94e-20	0.450067	0.0733343	-0.225395	-
ENSG00000087253.13	4.41e-39	0.608691	0.0975379	-0.208939	-
ENSG00000087263.17	1.73e-13	0.369649	0.116356	-0.198236	-
ENSG00000087274.17	4.67e-19	0.44013	0.0247545	-0.280519	RNAct
ENSG00000087338.5	6e-08	0.276384	0.821687	-0.0287325	-
ENSG00000087365.16	4.04e-21	0.462544	0.016518	-0.29867	-
ENSG00000087470.18	5.3e-13	0.362618	0.578802	-0.0706983	-
ENSG00000087502.18	1.16e-06	0.248958	0.853039	0.0236175	-
ENSG00000087589.16	6.93e-16	0.402063	0.0894121	-0.214064	-
ENSG00000088035.18	1.17e-08	0.290298	0.97237	-0.00441648	-
ENSG00000088179.9	5.55e-11	0.331345	0.383598	-0.110758	-
ENSG00000088205.13	7.33e-12	0.345381	0.712061	-0.0470377	-
ENSG00000088298.13	5.27e-36	0.588256	0.00864869	-0.325625	-
ENSG00000088387.19	3.87e-10	0.317181	0.422003	-0.102119	RNAct
ENSG00000088448.14	2.49e-15	0.394872	0.792849	-0.0334771	RNAct
ENSG00000088682.14	1.75e-14	0.383539	0.0900364	-0.213657	RNAct
ENSG00000088766.12	1.34e-08	0.289225	0.642953	0.0590601	-
ENSG00000088833.17	6.81e-20	0.449422	0.0763201	-0.223151	-
ENSG00000088930.8	4.5e-20	0.451381	0.0872292	-0.215502	-
ENSG00000088992.18	0.0716753	0.0934966	0.0936934	-0.21132	RNAct
ENSG00000089009.15	0.00113122	0.168161	0.78863	-0.034175	-
ENSG00000089022.14	6.96e-13	0.360873	0.210987	-0.15849	-
ENSG00000089053.13	1.04e-14	0.386613	0.163225	-0.176395	-
ENSG00000089060.11	3.37e-20	0.452737	0.0112314	-0.315022	-
ENSG00000089063.15	9.78e-14	0.373171	0.281714	-0.13662	RNAct
ENSG00000089127.14	3.05e-80	0.788881	0.00784637	-0.329485	-
ENSG00000089154.11	9.65e-09	0.291915	0.032692	-0.267369	-
ENSG00000089157.16	0.000230512	0.189854	0.931164	-0.0110144	RNAct
ENSG00000089159.16	2.29e-16	0.408162	0.0193166	-0.291777	-
ENSG00000089248.7	1.22e-17	0.423722	0.1371	-0.187878	-
ENSG00000089289.16	3.94e-12	0.349558	0.364264	-0.115302	-
ENSG00000089351.14	2.3e-17	0.420414	0.0781643	-0.2218	RNAct
ENSG00000089597.18	4.86e-16	0.404028	0.00570358	-0.341807	-
ENSG00000089639.11	3.38e-17	0.4184	0.0199208	-0.290402	-
ENSG00000089693.11	1.13e-18	0.435783	0.055267	-0.240804	RNAct
ENSG00000089737.17	9.6e-12	0.343556	0.3616	-0.11594	-
ENSG00000089818.18	1.63e-21	0.466642	0.062101	-0.234555	-
ENSG00000089820.16	2.1e-15	0.39583	0.0369596	-0.261376	-
ENSG00000089902.10	4.94e-22	0.471961	0.0290577	-0.273013	-
ENSG00000089916.18	3.43e-19	0.441638	0.417056	-0.103205	-
ENSG00000090013.11	0.726183	-0.0182172	0.699654	-0.0491633	-
ENSG00000090054.15	1.88e-21	0.466006	0.275247	-0.138453	-
ENSG00000090061.17	3.28e-26	0.511682	0.126285	-0.193117	-
ENSG00000090238.12	2.12e-14	0.382397	0.0156252	-0.30108	RNAct
ENSG00000090266.13	9.89e-07	0.250521	0.12059	-0.196014	RNAct
ENSG00000090273.14	4.08e-14	0.378488	0.217764	-0.156193	RNAct
ENSG00000090316.16	8.68e-21	0.459048	0.0355221	-0.263327	RNAct
ENSG00000090372.15	1.04e-15	0.399779	0.0656971	-0.231487	-
ENSG00000090376.11	5.57e-22	0.471431	0.380649	-0.111442	RNAct
ENSG00000090382.7	9.78e-12	0.343424	0.042304	-0.254633	-
ENSG00000090487.11	2.24e-24	0.494881	0.033163	-0.266677	RNAct
ENSG00000090520.11	2.45e-15	0.394953	0.0631194	-0.233672	RNAct
ENSG00000090615.15	9.93e-18	0.424779	0.00176565	-0.383385	RNAct
ENSG00000090621.15	1.38e-11	0.341072	0.426643	-0.101106	RNAct
ENSG00000090686.16	1.73e-15	0.396933	0.532513	-0.0794645	RNAct
ENSG00000090863.12	9.53e-16	0.400286	0.00679074	-0.335127	RNAct
ENSG00000090905.19	2.85e-10	0.319461	0.266418	-0.141002	-
ENSG00000090989.18	8.81e-20	0.448192	0.710076	-0.0473769	-
ENSG00000091009.8	8.77e-12	0.344169	0.559172	-0.0743735	-
ENSG00000091039.17	2.26e-13	0.367991	0.643027	-0.059047	-
ENSG00000091106.19	3.32e-27	0.520421	0.0749699	-0.224157	-
ENSG00000091140.14	1.32e-09	0.307845	0.668707	-0.0545252	-
ENSG00000091157.14	2.5e-12	0.352566	0.700829	-0.0489614	-
ENSG00000091164.13	3.57e-15	0.392799	0.711767	-0.0470879	RNAct
ENSG00000091317.8	1.43e-22	0.477383	0.345324	-0.119899	-
ENSG00000091409.15	2.44e-07	0.263784	0.502591	-0.0853311	-
ENSG00000091483.7	4.47e-09	0.298183	0.576417	-0.0711419	-
ENSG00000091490.11	1.88e-08	0.286374	0.988598	0.00182221	RNAct
ENSG00000091542.9	9.59e-16	0.40025	0.0943558	-0.210904	RNAct
ENSG00000091592.16	4.84e-15	0.391048	0.0123767	-0.310987	-
ENSG00000091947.10	7.08e-11	0.329612	0.38991	-0.109304	-
ENSG00000092010.15	4.93e-37	0.595256	0.00465061	-0.349446	-
ENSG00000092020.10	4.07e-16	0.405008	0.271124	-0.139637	-
ENSG00000092036.18	8.74e-34	0.572559	0.00332156	-0.361654	RNAct
ENSG00000092094.11	3.74e-12	0.349891	0.0699911	-0.227996	-
ENSG00000092098.17	7.99e-38	0.600515	0.000937391	-0.403781	-
ENSG00000092108.22	5.83e-15	0.38998	0.823498	-0.0284358	-
ENSG00000092148.13	2.17e-14	0.382252	0.531257	-0.0797073	-
ENSG00000092201.10	6.88e-15	0.389016	0.26058	-0.142719	-
ENSG00000092203.15	5.65e-20	0.450302	0.0724177	-0.226099	-
ENSG00000092330.18	2.66e-21	0.464442	0.042645	-0.254227	-
ENSG00000092439.16	2.65e-10	0.320007	0.904637	-0.0152759	-
ENSG00000092531.10	1.04e-20	0.458216	0.0915613	-0.212674	RNAct
ENSG00000092820.18	3.96e-15	0.392204	0.22348	-0.154294	-
ENSG00000092841.19	0.00150546	0.163982	0.775208	-0.0364018	RNAct
ENSG00000092929.12	1.86e-17	0.421526	0.0303044	-0.271013	-
ENSG00000092931.11	2.7e-17	0.419587	0.0129098	-0.309218	RNAct
ENSG00000092964.18	1.95e-21	0.465847	0.0188627	-0.292834	-
ENSG00000093000.19	4.82e-23	0.482055	0.0946438	-0.210724	-
ENSG00000093072.18	1.59e-35	0.584941	0.0044889	-0.350752	-
ENSG00000093134.15	1.1e-13	0.372451	0.608924	-0.0651676	-
ENSG00000093144.19	3.99e-14	0.378617	0.909936	-0.0144235	RNAct
ENSG00000093167.18	2.36e-22	0.475203	0.13211	-0.190255	-
ENSG00000093183.14	1.99e-10	0.322103	0.346576	-0.119591	RNAct
ENSG00000094631.21	6.05e-11	0.330729	0.0262008	-0.277881	-
ENSG00000094975.14	9.88e-11	0.327213	0.944618	0.00885785	-
ENSG00000095015.6	1.42e-24	0.496746	0.149948	-0.182045	-
ENSG00000095059.16	1.71e-14	0.38368	0.0694314	-0.228441	RNAct
ENSG00000095139.14	7.18e-25	0.499492	0.026494	-0.277362	-
ENSG00000095261.14	0.000705313	0.174867	0.898038	-0.0163384	-
ENSG00000095380.11	7.53e-33	0.565684	0.00609185	-0.339302	RNAct
ENSG00000095485.18	1.3e-16	0.411236	0.510493	-0.083765	-
ENSG00000095564.14	2.93e-11	0.335857	0.68287	-0.0520602	-
ENSG00000095787.23	4.45e-24	0.492057	0.187321	-0.166949	RNAct
ENSG00000095906.17	4.43e-11	0.33295	0.230478	-0.152014	RNAct
ENSG00000095951.17	5.45e-23	0.481528	0.0631897	-0.233611	-
ENSG00000096060.15	7.63e-16	0.401527	0.722794	-0.0452092	-
ENSG00000096746.17	8.66e-22	0.469475	0.604953	-0.0658896	-
ENSG00000096968.14	1.95e-37	0.597952	0.1971	-0.163366	-
ENSG00000097033.14	2.59e-34	0.576375	0.190293	-0.165847	-
ENSG00000099203.7	1.81e-17	0.421656	0.0759337	-0.223438	RNAct
ENSG00000099204.20	1.19e-06	0.248702	0.4969	-0.0864668	-
ENSG00000099246.17	8.55e-12	0.344343	0.834963	-0.0265615	-
ENSG00000099308.10	6.19e-14	0.375961	0.0447252	-0.251808	-
ENSG00000099331.13	1.09e-16	0.412158	0.0159085	-0.300303	-
ENSG00000099341.11	5.91e-18	0.427439	0.0839824	-0.217696	RNAct
ENSG00000099622.14	5.33e-09	0.296769	0.492024	-0.0874453	RNAct
ENSG00000099783.12	7.43e-17	0.414222	0.121937	-0.195319	RNAct
ENSG00000099795.7	1.93e-06	0.243909	0.268891	-0.140283	-
ENSG00000099817.12	7.81e-14	0.374547	0.0451591	-0.251315	RNAct
ENSG00000099860.9	4.04e-45	0.644902	0.00316969	-0.363315	-
ENSG00000099899.15	1.33e-12	0.356691	0.0359238	-0.262775	RNAct
ENSG00000099910.17	1.3e-15	0.398553	0.0591153	-0.237213	-
ENSG00000099917.17	3.31e-14	0.37975	0.0514257	-0.244597	-
ENSG00000099949.21	1.01e-12	0.358484	0.0125004	-0.31057	-
ENSG00000099968.18	6.42e-20	0.449703	0.0167833	-0.297976	-
ENSG00000099977.14	3.32e-09	0.300556	0.283148	-0.136217	RNAct
ENSG00000099991.18	1.58e-12	0.355562	0.124903	-0.193811	-
ENSG00000099992.16	6.75e-13	0.361073	0.0390335	-0.258669	RNAct
ENSG00000099995.19	1.95e-17	0.421285	0.051557	-0.244464	-
ENSG00000100014.20	5.45e-17	0.415871	0.269174	-0.1402	-
ENSG00000100023.19	1.21e-16	0.411623	0.0134792	-0.307397	-
ENSG00000100028.12	2.48e-09	0.302895	0.772561	0.0368421	-
ENSG00000100029.18	1.95e-11	0.338674	0.163231	-0.176392	-
ENSG00000100034.14	6.02e-17	0.415347	0.0171447	-0.297044	-
ENSG00000100038.20	4.56e-13	0.363567	0.0425351	-0.254358	-
ENSG00000100055.21	4.45e-32	0.559885	0.00142938	-0.390335	-
ENSG00000100060.18	9.86e-15	0.386915	0.10415	-0.205009	-
ENSG00000100079.7	0.0331863	0.11046	0.393179	-0.108557	-
ENSG00000100097.12	1.57e-08	0.287879	0.129774	-0.191391	RNAct
ENSG00000100100.13	1.06e-09	0.309493	0.227933	-0.152838	-
ENSG00000100109.17	4.49e-16	0.404461	0.128813	-0.191863	-
ENSG00000100129.18	7.58e-08	0.274338	0.775417	-0.036367	-
ENSG00000100138.15	1.06e-10	0.326733	0.234081	-0.150859	-
ENSG00000100142.16	3.34e-15	0.393194	0.112066	-0.200551	RNAct
ENSG00000100150.20	5.32e-11	0.331651	0.118602	-0.197049	-
ENSG00000100201.23	8.83e-22	0.469391	0.128084	-0.192222	-
ENSG00000100207.20	4.48e-17	0.416916	0.038946	-0.258781	-
ENSG00000100216.6	4.78e-09	0.297637	0.699018	-0.0492726	-
ENSG00000100219.16	8.48e-12	0.3444	0.241856	-0.148408	RNAct
ENSG00000100220.12	4.69e-24	0.49184	0.0456591	-0.250752	-
ENSG00000100221.10	3.22e-08	0.28179	0.224474	-0.153967	-
ENSG00000100226.16	6.57e-55	0.694762	0.0049255	-0.347315	-
ENSG00000100227.18	1.46e-24	0.496623	0.00950559	-0.321833	-
ENSG00000100239.16	7.61e-16	0.401543	0.00675143	-0.335352	-
ENSG00000100242.15	1.77e-17	0.4218	0.0112903	-0.314806	-
ENSG00000100266.19	2.89e-23	0.484237	0.003311	-0.361767	-
ENSG00000100284.21	1.85e-22	0.476261	0.032668	-0.267405	-
ENSG00000100288.20	2.64e-27	0.521275	0.0010421	-0.400458	RNAct
ENSG00000100296.14	5.84e-25	0.500327	0.0258096	-0.278583	-
ENSG00000100297.16	6.37e-12	0.346334	0.322856	-0.12556	-
ENSG00000100300.18	2.62e-14	0.381132	0.0437819	-0.252893	-
ENSG00000100307.13	7.99e-16	0.40127	0.157679	-0.178712	-
ENSG00000100316.16	1.28e-05	0.224138	0.928202	-0.0114895	RNAct
ENSG00000100325.15	3.65e-06	0.237433	0.0496702	-0.246408	-
ENSG00000100330.16	3.32e-25	0.50259	0.103613	-0.205321	-
ENSG00000100342.21	4.19e-92	0.82104	0.00145808	-0.389688	-
ENSG00000100345.22	1.04e-18	0.436194	0.0237128	-0.282501	-
ENSG00000100347.15	1.21e-10	0.325748	0.303066	-0.130759	-
ENSG00000100351.17	2.16e-15	0.395679	0.0201301	-0.289934	-
ENSG00000100353.18	1.48e-11	0.340575	0.317485	-0.126951	-
ENSG00000100354.21	9.85e-20	0.447663	0.0684441	-0.229234	-
ENSG00000100359.21	2.14e-14	0.38236	0.0250093	-0.280045	-
ENSG00000100365.16	4.82e-22	0.47207	0.0127921	-0.309603	-
ENSG00000100368.14	9.23e-32	0.557474	0.00250171	-0.371585	-
ENSG00000100376.12	2.95e-06	0.239618	0.974692	0.00404517	RNAct
ENSG00000100380.14	1.08e-13	0.372568	0.151069	-0.181554	-
ENSG00000100387.9	4.57e-06	0.235101	0.182487	-0.16877	-
ENSG00000100393.14	1.28e-17	0.423465	0.0522492	-0.243765	-
ENSG00000100416.15	2.12e-12	0.353641	0.0448317	-0.251686	RNAct
ENSG00000100422.14	7.42e-16	0.401684	0.12374	-0.194399	-
ENSG00000100439.10	2.04e-18	0.432821	0.0245805	-0.280845	-
ENSG00000100441.10	3.97e-19	0.440929	0.0123476	-0.311085	RNAct
ENSG00000100445.17	1.58e-06	0.245889	0.714973	-0.0465407	RNAct
ENSG00000100450.13	0.000746532	0.174074	0.372772	-0.113285	-
ENSG00000100453.13	2.86e-08	0.282799	0.0079639	-0.328898	-
ENSG00000100461.18	4.3e-24	0.492192	0.0584756	-0.237796	-
ENSG00000100483.14	1.29e-16	0.411269	0.442152	-0.097767	RNAct
ENSG00000100485.12	6.98e-24	0.490188	0.412263	-0.104265	RNAct
ENSG00000100490.9	3.78e-07	0.259716	0.0548692	-0.241186	-
ENSG00000100503.26	1.47e-22	0.477263	0.0474338	-0.248793	-
ENSG00000100504.17	5.83e-22	0.471229	0.133391	-0.189639	-
ENSG00000100519.12	6.45e-11	0.330281	0.566418	-0.07301	-
ENSG00000100523.16	3.27e-13	0.365667	0.514716	-0.082933	-
ENSG00000100528.12	3.64e-06	0.237458	0.786426	0.03454	-
ENSG00000100554.12	9.29e-16	0.400427	0.545295	-0.0770086	RNAct
ENSG00000100567.13	6.68e-22	0.470627	0.591515	-0.0683488	-
ENSG00000100568.11	4.13e-07	0.258875	0.0295754	-0.272174	-
ENSG00000100578.18	4.94e-11	0.332175	0.679436	-0.052656	-
ENSG00000100591.8	1.71e-13	0.369733	0.252819	-0.145043	-
ENSG00000100596.7	4.64e-29	0.536059	0.0592187	-0.237119	-
ENSG00000100599.16	4.57e-16	0.404365	0.0191729	-0.292109	-
ENSG00000100603.14	1.2e-16	0.411638	0.56902	-0.0725225	-
ENSG00000100605.17	1.05e-30	0.54927	0.0134977	-0.307339	-
ENSG00000100612.14	1.99e-14	0.382773	0.787423	-0.0343749	RNAct
ENSG00000100614.18	5.8e-05	0.206904	0.479247	-0.0900339	-
ENSG00000100632.11	0.00319731	0.15247	0.736919	0.0428166	-
ENSG00000100644.17	6.94e-32	0.558422	0.0119559	-0.31243	-
ENSG00000100647.8	4.1e-17	0.417382	0.0131586	-0.308414	-
ENSG00000100650.16	1.4e-12	0.356346	0.409086	-0.104971	-
ENSG00000100664.11	3.31e-16	0.406147	0.402948	-0.106345	-
ENSG00000100697.15	1.81e-24	0.495743	0.327174	-0.124454	-
ENSG00000100721.11	0.0138705	0.127484	0.818483	-0.0292576	-
ENSG00000100722.20	1.46e-10	0.324374	0.322196	-0.12573	RNAct
ENSG00000100731.16	1.26e-19	0.446475	0.181926	-0.168984	-
ENSG00000100749.8	0.0204604	0.120141	0.584959	0.0695576	-
ENSG00000100764.14	7.07e-16	0.401948	0.424113	-0.101658	-
ENSG00000100784.12	5.03e-16	0.403834	0.181066	-0.169312	-
ENSG00000100796.17	1.99e-19	0.444287	0.266648	-0.140935	-
ENSG00000100804.19	1.06e-11	0.342885	0.0659409	-0.231284	RNAct
ENSG00000100811.14	2.48e-17	0.420035	0.172904	-0.172486	-
ENSG00000100813.14	3.89e-21	0.46272	0.0241497	-0.281661	-
ENSG00000100815.12	2e-11	0.338515	0.512179	-0.0834325	-
ENSG00000100823.12	4.55e-07	0.257971	0.982751	-0.00275685	-
ENSG00000100852.13	1.07e-05	0.226106	0.543036	0.0774405	RNAct
ENSG00000100865.15	1.05e-18	0.436147	0.439331	-0.0983695	-
ENSG00000100883.13	2.95e-15	0.393888	0.62836	-0.0616622	-
ENSG00000100888.15	2.33e-21	0.465043	0.0131876	-0.308321	-
ENSG00000100897.18	4.07e-29	0.536526	7.85e-05	-0.473205	-
ENSG00000100902.11	5.43e-07	0.25629	0.765517	-0.0380163	RNAct
ENSG00000100911.16	7.16e-25	0.499502	0.162557	-0.176671	-
ENSG00000100926.15	1.1e-28	0.532961	0.00538273	-0.343993	RNAct
ENSG00000100934.15	3.27e-14	0.37981	0.214709	-0.157222	RNAct
ENSG00000100938.18	3.25e-33	0.568386	0.0056095	-0.342437	-
ENSG00000100941.9	1.52e-14	0.384372	0.35123	-0.118449	RNAct
ENSG00000100985.7	4.29e-11	0.333166	0.327828	-0.124287	-
ENSG00000100991.12	3.82e-26	0.51109	0.00859181	-0.325888	-
ENSG00000101019.22	5.21e-10	0.31494	0.179268	-0.170002	-
ENSG00000101040.19	1.63e-15	0.397266	0.0558589	-0.240238	-
ENSG00000101082.14	1.61e-16	0.41007	0.008501	-0.326311	-
ENSG00000101109.12	2.55e-21	0.464636	0.246944	-0.146833	RNAct
ENSG00000101126.18	4.07e-18	0.429337	0.138939	-0.187019	-
ENSG00000101138.12	2.06e-12	0.353827	0.220109	-0.15541	-
ENSG00000101150.18	7.64e-26	0.508386	0.0226386	-0.284623	-
ENSG00000101152.11	2.06e-22	0.475787	0.00816147	-0.32793	-
ENSG00000101158.15	2.87e-15	0.394054	0.148734	-0.182579	RNAct
ENSG00000101161.8	1.23e-17	0.42367	0.0473742	-0.248858	-
ENSG00000101162.4	3.81e-12	0.349771	0.0301715	-0.271223	-
ENSG00000101166.16	2.62e-10	0.32008	0.727843	-0.0443523	RNAct
ENSG00000101181.17	2.76e-20	0.453674	0.0124189	-0.310844	-
ENSG00000101182.15	9.9e-17	0.412691	0.0849105	-0.217062	RNAct
ENSG00000101191.17	5.79e-18	0.427548	0.068568	-0.229134	-
ENSG00000101193.8	2.27e-15	0.395403	0.113491	-0.199774	-
ENSG00000101236.17	8.07e-28	0.525688	0.00377909	-0.357028	-
ENSG00000101246.20	8.91e-17	0.413254	0.0431747	-0.253602	RNAct
ENSG00000101265.16	3.39e-20	0.452719	0.0520332	-0.243982	-
ENSG00000101266.19	1.81e-16	0.409424	0.174089	-0.172019	-
ENSG00000101290.14	1.03e-26	0.516131	0.00301106	-0.365127	-
ENSG00000101294.18	4.99e-15	0.390882	0.0385263	-0.25932	-
ENSG00000101307.16	1.8e-16	0.409464	0.132705	-0.189968	-
ENSG00000101310.17	2.7e-17	0.419584	0.132789	-0.189928	-
ENSG00000101336.17	4.66e-31	0.552048	0.0022122	-0.3758	RNAct
ENSG00000101343.15	2.19e-19	0.443816	0.288958	-0.1346	-
ENSG00000101347.10	1.65e-54	0.692911	0.003789	-0.356934	-
ENSG00000101361.17	2e-13	0.368733	0.17873	-0.17021	-
ENSG00000101365.21	5.69e-14	0.376478	0.0545204	-0.241524	-
ENSG00000101367.9	2.66e-20	0.453849	0.184428	-0.168035	-
ENSG00000101391.21	3.12e-14	0.380104	0.280599	-0.136934	-
ENSG00000101439.9	5.65e-19	0.439201	0.0604913	-0.235975	RNAct
ENSG00000101457.13	2.85e-24	0.493892	0.0434895	-0.253233	RNAct
ENSG00000101473.17	1.07e-16	0.412255	0.169819	-0.173714	RNAct
ENSG00000101474.12	1.07e-19	0.447278	0.169068	-0.174016	-
ENSG00000101493.11	1.9e-16	0.409171	0.0459801	-0.250393	-
ENSG00000101558.14	5.12e-22	0.471802	0.28837	-0.134762	-
ENSG00000101577.10	6.38e-21	0.460465	0.00363355	-0.358443	-
ENSG00000101596.16	7.43e-45	0.643413	0.142337	-0.185453	-
ENSG00000101608.13	7.49e-25	0.499322	0.0635554	-0.233297	-
ENSG00000101639.18	3.08e-14	0.380179	0.149888	-0.182071	-
ENSG00000101695.9	9.64e-13	0.358782	0.190972	-0.165596	-
ENSG00000101745.17	3.22e-14	0.379912	0.787943	-0.0342887	-
ENSG00000101751.10	3.95e-14	0.378677	0.861717	0.0222086	RNAct
ENSG00000101752.12	3.93e-16	0.405195	0.980443	-0.00312574	-
ENSG00000101782.15	0.000659192	0.175808	0.0370381	-0.261271	-
ENSG00000101843.19	1.58e-07	0.267762	0.370326	-0.113862	-
ENSG00000101849.17	7.25e-20	0.449125	0.102962	-0.2057	RNAct
ENSG00000101856.10	4.69e-10	0.315729	0.147502	-0.183126	-
ENSG00000101901.12	1.65e-12	0.355278	0.276465	-0.138106	-
ENSG00000101916.12	5.33e-30	0.543686	0.0469483	-0.249323	-
ENSG00000101940.18	4.53e-14	0.377853	0.0360758	-0.262568	-
ENSG00000101966.13	1.88e-28	0.531014	0.0767441	-0.222838	-
ENSG00000101972.19	1.23e-13	0.371757	0.981383	-0.00297549	-
ENSG00000102007.11	1.24e-18	0.435325	0.0356812	-0.263108	-
ENSG00000102030.16	1.21e-12	0.357292	0.00966862	-0.321146	RNAct
ENSG00000102032.13	2.72e-24	0.494081	0.0381722	-0.259778	RNAct
ENSG00000102054.18	3.39e-10	0.318172	0.184279	-0.168091	RNAct
ENSG00000102096.9	8.08e-25	0.499018	0.0292646	-0.272676	-
ENSG00000102103.17	5.38e-13	0.362515	0.161831	-0.176972	-
ENSG00000102144.15	1.43e-21	0.467231	0.160786	-0.177407	-
ENSG00000102145.15	0.00438234	0.147415	0.128623	-0.191956	RNAct
ENSG00000102158.20	8.65e-14	0.373924	0.290432	-0.134193	-
ENSG00000102172.16	2.48e-15	0.394895	0.117855	-0.197442	-
ENSG00000102178.13	3.51e-10	0.317903	0.00925316	-0.322918	RNAct
ENSG00000102218.6	3.1e-26	0.5119	0.200363	-0.162199	-
ENSG00000102241.12	1.12e-09	0.309088	0.718698	-0.045906	RNAct
ENSG00000102265.12	1.33e-15	0.398423	0.245086	-0.147406	-
ENSG00000102316.17	1.33e-16	0.411113	0.0300504	-0.271415	RNAct
ENSG00000102317.18	8.14e-07	0.252407	0.531536	-0.0796533	-
ENSG00000102393.14	5.99e-25	0.50022	0.00445815	-0.351005	-
ENSG00000102401.20	2.96e-14	0.38041	0.155012	-0.179848	-
ENSG00000102445.20	3.02e-13	0.36617	0.484155	-0.0890354	-
ENSG00000102524.11	4.97e-136	0.900701	0.000729335	-0.411522	-
ENSG00000102531.16	1.09e-24	0.497798	0.217963	-0.156126	-
ENSG00000102572.15	7.9e-27	0.517139	0.00972776	-0.320899	-
ENSG00000102575.13	6.56e-07	0.254482	0.287353	-0.135044	RNAct
ENSG00000102580.15	2.86e-20	0.453513	0.515984	-0.0826839	-
ENSG00000102699.6	2.57e-32	0.561697	0.0125077	-0.310546	-
ENSG00000102710.20	3.11e-17	0.418835	0.888163	0.0179306	-
ENSG00000102760.13	0.000493945	0.179769	0.239409	-0.149174	RNAct
ENSG00000102786.15	1.07e-19	0.447257	0.332896	-0.123001	-
ENSG00000102796.11	2.37e-23	0.485066	0.00443491	-0.351197	RNAct
ENSG00000102804.15	1.92e-11	0.338792	0.158897	-0.178198	-
ENSG00000102805.16	2.2e-19	0.443791	0.399258	-0.107177	RNAct
ENSG00000102858.13	1.86e-12	0.354526	0.0665575	-0.230773	-
ENSG00000102879.16	6.28e-20	0.449807	0.0199784	-0.290273	RNAct
ENSG00000102893.16	7.65e-20	0.448868	0.456268	-0.0947839	-
ENSG00000102897.10	3.67e-29	0.5369	0.0681454	-0.229475	RNAct
ENSG00000102898.12	5.67e-12	0.347118	0.359553	-0.116432	RNAct
ENSG00000102900.13	1.95e-14	0.382884	0.0927021	-0.211946	-
ENSG00000102908.22	1.65e-23	0.486587	0.0512506	-0.244776	-
ENSG00000102910.14	2.42e-13	0.367549	0.488942	-0.0880664	-
ENSG00000102921.8	2.6e-32	0.561655	0.00904738	-0.323822	-
ENSG00000102931.8	2.84e-11	0.33608	0.382846	-0.110932	RNAct
ENSG00000102974.16	5.68e-16	0.40317	0.0974262	-0.209007	RNAct
ENSG00000102978.13	3.51e-20	0.452551	0.100565	-0.207115	RNAct
ENSG00000103005.12	1.68e-22	0.476678	0.00584576	-0.340873	-
ENSG00000103018.17	3.15e-12	0.351044	0.128182	-0.192174	-
ENSG00000103024.7	3.15e-09	0.300983	0.130203	-0.191181	RNAct
ENSG00000103035.11	1.35e-12	0.356584	0.524953	-0.0809307	RNAct
ENSG00000103051.20	2.79e-14	0.380776	0.120619	-0.195998	-
ENSG00000103061.13	2.87e-19	0.442517	0.0253726	-0.279376	-
ENSG00000103064.15	4.61e-12	0.348506	0.0992317	-0.207913	-
ENSG00000103091.15	2.77e-12	0.351892	0.0836743	-0.217907	RNAct
ENSG00000103111.15	1.03e-18	0.436249	0.127251	-0.192636	RNAct
ENSG00000103148.17	0.0140743	0.127215	0.320253	-0.126232	-
ENSG00000103152.12	1.94e-13	0.368932	0.0435829	-0.253125	RNAct
ENSG00000103187.8	8.51e-20	0.44836	0.0124466	-0.310751	-
ENSG00000103194.16	2.09e-18	0.432695	0.408268	-0.105154	-
ENSG00000103196.12	8.2e-15	0.387997	0.28683	-0.13519	-
ENSG00000103197.18	1.31e-12	0.356816	0.0146078	-0.303975	-
ENSG00000103202.13	2.61e-06	0.240852	0.371007	-0.113701	RNAct
ENSG00000103226.19	6.75e-12	0.345941	0.10895	-0.202276	-
ENSG00000103249.18	2.17e-16	0.408459	0.00166232	-0.385385	-
ENSG00000103274.11	6.37e-15	0.389464	0.419067	-0.102763	-
ENSG00000103313.13	3.33e-36	0.589626	0.00273163	-0.368537	-
ENSG00000103335.22	2.4e-14	0.381664	0.00338075	-0.361025	RNAct
ENSG00000103342.13	0.00422175	0.148021	0.0964971	-0.209576	RNAct
ENSG00000103353.16	1.22e-08	0.289981	0.012528	-0.310478	RNAct
ENSG00000103363.15	0.335999	0.0500198	0.819707	0.029057	RNAct
ENSG00000103365.15	4.86e-12	0.348147	0.573695	-0.071649	RNAct
ENSG00000103381.12	4.19e-22	0.472684	0.0215084	-0.286951	-
ENSG00000103415.12	5.89e-15	0.389915	0.0762743	-0.223185	RNAct
ENSG00000103423.14	1.09e-10	0.32653	0.163584	-0.176247	-
ENSG00000103429.11	1.62e-11	0.339985	0.387213	-0.109924	-
ENSG00000103479.16	1.59e-14	0.384113	0.594449	-0.0678098	RNAct
ENSG00000103490.14	7.34e-24	0.489982	0.0143708	-0.304674	RNAct
ENSG00000103496.15	7e-23	0.480457	0.00502482	-0.346571	RNAct
ENSG00000103502.14	1.72e-16	0.409721	0.001913	-0.380709	RNAct
ENSG00000103510.20	2.6e-15	0.394608	0.169565	-0.173816	RNAct
ENSG00000103549.22	2.96e-20	0.453347	0.0183721	-0.294002	RNAct
ENSG00000103569.10	1.91e-34	0.577325	0.0989864	-0.208061	-
ENSG00000103591.13	6.39e-13	0.361417	0.474355	-0.0910347	-
ENSG00000103653.16	3.06e-19	0.44219	0.00606063	-0.339498	RNAct
ENSG00000103657.14	9.39e-14	0.373423	0.0870058	-0.215651	-
ENSG00000103769.10	7.33e-17	0.414296	0.544403	-0.077179	-
ENSG00000103811.18	3.64e-19	0.441348	0.115483	-0.198701	RNAct
ENSG00000103978.16	8.93e-18	0.425327	0.439224	-0.0983923	-
ENSG00000103994.18	1.33e-26	0.51515	0.0404339	-0.256908	-
ENSG00000104043.15	2.41e-15	0.395053	0.0733171	-0.225408	-
ENSG00000104064.18	5.61e-14	0.376563	0.577442	-0.0709511	-
ENSG00000104093.14	1.38e-28	0.532151	0.0621125	-0.234545	-
ENSG00000104129.10	6.11e-12	0.346607	0.120337	-0.196144	-
ENSG00000104131.13	4.03e-16	0.405063	0.554895	-0.0751823	RNAct
ENSG00000104133.15	1.18e-30	0.548886	0.00561336	-0.34241	-
ENSG00000104142.11	1.51e-15	0.397702	0.0444995	-0.252066	-
ENSG00000104164.12	1.92e-07	0.26597	0.384582	-0.110531	RNAct
ENSG00000104205.16	1.23e-13	0.371751	0.317579	-0.126926	-
ENSG00000104218.16	2.46e-12	0.352668	0.249218	-0.146137	-
ENSG00000104219.13	9.25e-08	0.272565	0.660016	-0.0560477	-
ENSG00000104231.11	0.000443947	0.181213	0.774142	-0.036579	-
ENSG00000104267.10	2.63e-06	0.240788	0.153423	-0.180531	-
ENSG00000104320.14	1.46e-34	0.578158	0.137952	-0.187479	-
ENSG00000104324.16	4.72e-21	0.461838	0.12299	-0.19478	RNAct
ENSG00000104325.7	1.04e-26	0.516108	0.0619233	-0.23471	-
ENSG00000104343.21	4.98e-13	0.363003	0.936288	-0.0101926	-
ENSG00000104365.16	2.6e-16	0.407463	0.00807884	-0.328332	RNAct
ENSG00000104388.15	6.54e-22	0.470722	0.425979	-0.101251	RNAct
ENSG00000104408.11	0.00668526	0.140393	0.682462	0.0521309	-
ENSG00000104412.8	4.24e-07	0.258631	0.845622	-0.0248239	-
ENSG00000104419.17	2.05e-24	0.495231	0.0235157	-0.282884	-
ENSG00000104442.10	1.9e-06	0.244074	0.791448	-0.0337088	-
ENSG00000104447.13	8.8e-18	0.425399	0.080433	-0.220172	-
ENSG00000104517.13	6.6e-21	0.460306	0.0539087	-0.24212	-
ENSG00000104518.11	1.97e-34	0.577219	0.00017028	-0.453083	RNAct
ENSG00000104529.17	1.12e-09	0.309098	0.451409	-0.0958049	RNAct
ENSG00000104613.12	2.9e-13	0.366417	0.22848	-0.15266	RNAct
ENSG00000104660.19	5.95e-13	0.361875	0.63373	-0.0607019	-
ENSG00000104714.14	2.01e-22	0.475905	0.0725603	-0.225989	RNAct
ENSG00000104731.14	6.66e-12	0.346027	0.00965823	-0.321189	RNAct
ENSG00000104756.16	1.05e-14	0.386538	0.635287	-0.0604241	-
ENSG00000104763.20	1.18e-18	0.435543	0.139351	-0.186827	RNAct
ENSG00000104765.16	0.107322	0.0836278	0.329449	-0.123874	RNAct
ENSG00000104774.13	3.19e-17	0.418706	0.0287392	-0.273535	-
ENSG00000104805.16	3.13e-26	0.511866	0.0012057	-0.395826	-
ENSG00000104814.13	5.53e-12	0.347287	0.503444	-0.0851614	-
ENSG00000104823.9	6.28e-15	0.389547	0.209052	-0.159156	-
ENSG00000104824.17	1.05e-16	0.412381	0.153077	-0.180681	RNAct
ENSG00000104852.15	3.84e-15	0.39239	0.0176709	-0.295718	RNAct
ENSG00000104859.15	9.96e-17	0.412655	0.0319625	-0.268458	RNAct
ENSG00000104872.11	8.8e-12	0.344147	0.351784	-0.118314	-
ENSG00000104880.18	8.38e-17	0.413585	0.0680692	-0.229537	-
ENSG00000104894.12	3.58e-22	0.473373	0.0290943	-0.272953	RNAct
ENSG00000104904.12	2.09e-05	0.218649	0.0983501	-0.208445	RNAct
ENSG00000104907.12	2.59e-13	0.367121	0.0696303	-0.228283	-
ENSG00000104915.15	1.57e-26	0.514523	0.0321036	-0.268246	RNAct
ENSG00000104918.8	0.0186061	0.121969	0.266293	-0.141039	-
ENSG00000104957.14	1.31e-13	0.371364	0.112885	-0.200103	RNAct
ENSG00000104960.15	1.85e-12	0.354556	0.0459136	-0.250467	RNAct
ENSG00000104974.12	7.3e-21	0.459844	0.0119552	-0.312433	-
ENSG00000104979.9	6.6e-12	0.346092	0.373443	-0.113127	-
ENSG00000104998.4	2.44e-14	0.381572	0.0929879	-0.211765	-
ENSG00000105053.11	3.38e-22	0.473626	0.094435	-0.210855	RNAct
ENSG00000105058.12	1.09e-19	0.447199	0.127253	-0.192635	RNAct
ENSG00000105063.19	6.8e-13	0.361023	0.021858	-0.28622	-
ENSG00000105127.9	2.85e-16	0.406963	0.0354617	-0.26341	-
ENSG00000105171.10	1.67e-15	0.397131	0.283087	-0.136235	-
ENSG00000105176.18	6.23e-11	0.330527	0.645918	-0.0585345	-
ENSG00000105185.12	1.57e-06	0.245992	0.718749	-0.0458973	RNAct
ENSG00000105186.16	6.94e-13	0.360892	0.328609	-0.124088	-
ENSG00000105193.9	0.00966554	0.134005	0.543112	0.077426	-
ENSG00000105202.9	0.000393285	0.18284	0.76969	0.0373204	RNAct
ENSG00000105205.7	0.304865	0.0533402	0.194018	-0.164481	-
ENSG00000105221.18	1.75e-13	0.36959	0.0820047	-0.219065	RNAct
ENSG00000105223.20	1.47e-14	0.38458	0.0199376	-0.290364	RNAct
ENSG00000105254.12	8.95e-14	0.373716	0.131051	-0.190768	RNAct
ENSG00000105258.9	7.75e-07	0.252882	0.125743	-0.193388	-
ENSG00000105281.12	0.00161185	0.162969	0.480747	-0.0897281	RNAct
ENSG00000105287.13	1.47e-40	0.617996	0.00179581	-0.382822	-
ENSG00000105325.15	4.37e-15	0.391639	0.00295448	-0.365794	RNAct
ENSG00000105329.11	8.32e-14	0.374163	0.0307944	-0.270246	-
ENSG00000105339.11	4.93e-27	0.518927	0.00154068	-0.387886	RNAct
ENSG00000105352.10	3.81e-12	0.349769	0.178469	-0.17031	RNAct
ENSG00000105355.9	6.37e-30	0.543062	0.00779711	-0.329733	-
ENSG00000105372.8	5.4e-05	0.207761	0.762552	-0.0385114	-
ENSG00000105374.10	4.29e-10	0.316398	0.00953705	-0.3217	-
ENSG00000105379.10	5.6e-13	0.362263	0.374944	-0.112775	-
ENSG00000105393.16	0.000383034	0.183193	0.168393	-0.174287	RNAct
ENSG00000105397.14	2.23e-18	0.43237	0.00807077	-0.328372	-
ENSG00000105401.9	3.03e-16	0.406626	0.0445394	-0.25202	-
ENSG00000105402.8	1.02e-46	0.653736	0.00754612	-0.331018	RNAct
ENSG00000105404.11	3.75e-19	0.441202	0.116301	-0.198265	RNAct
ENSG00000105443.15	2.43e-18	0.431948	0.0128686	-0.309352	-
ENSG00000105483.18	4.69e-28	0.527688	0.0231942	-0.283515	-
ENSG00000105514.8	5.66e-17	0.415671	0.0648972	-0.232158	-
ENSG00000105518.14	7.7e-13	0.360222	0.377194	-0.112248	-
ENSG00000105568.18	2.05e-15	0.395976	0.152922	-0.180748	-
ENSG00000105583.11	3.99e-14	0.378616	0.0268734	-0.276696	-
ENSG00000105607.13	2.89e-09	0.301667	0.0929485	-0.21179	RNAct
ENSG00000105610.6	0.937207	0.00409837	0.952606	-0.00757859	RNAct
ENSG00000105612.9	4.03e-17	0.417474	0.0175658	-0.29598	-
ENSG00000105618.14	4.3e-10	0.316375	0.0948285	-0.210609	-
ENSG00000105639.20	4.73e-23	0.482132	0.00450693	-0.350604	-
ENSG00000105640.13	0.00254925	0.156013	0.850714	-0.0239956	-
ENSG00000105643.10	1.41e-15	0.398079	0.0503697	-0.24568	RNAct
ENSG00000105656.13	1.12e-18	0.435813	0.0129051	-0.309233	-
ENSG00000105669.14	7.37e-21	0.4598	0.0244377	-0.281114	RNAct
ENSG00000105671.12	7.65e-14	0.374677	0.0437845	-0.25289	-
ENSG00000105698.16	3.08e-14	0.380168	0.0362041	-0.262393	RNAct
ENSG00000105700.11	1.88e-18	0.433222	0.013379	-0.307712	RNAct
ENSG00000105701.16	0.0190386	0.121529	0.203323	-0.161152	RNAct
ENSG00000105726.17	5.64e-16	0.403202	0.0104249	-0.318083	-
ENSG00000105778.19	1.52e-21	0.466959	0.0632907	-0.233525	RNAct
ENSG00000105793.16	2.63e-08	0.283507	0.870398	0.020802	-
ENSG00000105819.14	2.08e-12	0.353778	0.607574	-0.0654128	RNAct
ENSG00000105829.13	3.93e-08	0.280069	0.893789	0.0170231	-
ENSG00000105835.12	2.8e-28	0.529569	0.258364	-0.143378	-
ENSG00000105851.11	2.83e-24	0.49391	0.0487898	-0.247336	-
ENSG00000105856.14	3.92e-19	0.44099	0.506983	-0.0844591	-
ENSG00000105866.15	7.54e-08	0.274383	0.747591	0.0410187	-
ENSG00000105879.12	8.63e-12	0.344277	0.826292	-0.0279785	-
ENSG00000105887.11	1.21e-25	0.506599	0.102614	-0.205904	-
ENSG00000105939.13	1.32e-99	0.838526	0.00124019	-0.394923	-
ENSG00000105953.15	1.91e-18	0.433153	0.0315651	-0.26906	-
ENSG00000105967.16	3.69e-26	0.511223	0.368525	-0.114289	-
ENSG00000105983.22	3.74e-14	0.379015	0.295692	-0.132751	-
ENSG00000106028.11	1.25e-07	0.26991	0.623417	-0.0625493	RNAct
ENSG00000106052.13	3.08e-12	0.351196	0.974796	0.00402868	-
ENSG00000106066.15	2.03e-19	0.444192	0.0983798	-0.208427	-
ENSG00000106069.23	4.58e-16	0.404356	0.0700171	-0.227976	-
ENSG00000106144.20	3.38e-16	0.406025	0.344392	-0.120129	-
ENSG00000106153.13	7.89e-14	0.374489	0.138334	-0.187301	-
ENSG00000106244.13	7.57e-19	0.437759	0.0483165	-0.247841	-
ENSG00000106245.11	1.05e-20	0.458152	0.0947911	-0.210632	-
ENSG00000106261.17	3.29e-12	0.35074	0.0415594	-0.255528	-
ENSG00000106263.18	1.99e-11	0.338561	0.0424664	-0.254439	RNAct
ENSG00000106268.15	0.000757401	0.173871	0.298231	-0.132062	-
ENSG00000106344.8	4.4e-11	0.332989	0.228972	-0.152501	-
ENSG00000106348.18	2.01e-16	0.40886	0.0448457	-0.251671	RNAct
ENSG00000106392.11	1.27e-40	0.618392	0.197101	-0.163366	-
ENSG00000106400.12	2.68e-15	0.394451	0.129033	-0.191755	RNAct
ENSG00000106415.13	6.15e-14	0.375999	0.550669	-0.0759843	-
ENSG00000106443.17	5.23e-08	0.277599	0.936397	0.0101752	-
ENSG00000106459.15	4.83e-16	0.404063	0.13633	-0.188241	-
ENSG00000106460.19	4.32e-07	0.25846	0.640345	0.0595234	-
ENSG00000106479.11	3.1e-12	0.35114	0.366192	-0.114843	-
ENSG00000106546.14	1.12e-14	0.38619	0.377237	-0.112238	-
ENSG00000106554.13	1.77e-13	0.369503	0.473571	-0.0911956	RNAct
ENSG00000106560.11	7.22e-16	0.401831	0.271345	-0.139573	-
ENSG00000106588.12	6.25e-06	0.231817	0.986629	0.00213702	-
ENSG00000106591.4	0.000754883	0.173918	0.579852	-0.0705035	-
ENSG00000106603.19	4.05e-17	0.417445	0.33292	-0.122995	-
ENSG00000106605.11	8.18e-47	0.654249	0.00279067	-0.367792	-
ENSG00000106609.16	9.17e-19	0.436812	0.0302611	-0.271081	-
ENSG00000106617.15	8.23e-37	0.593758	0.00889931	-0.324483	RNAct
ENSG00000106636.9	4.88e-20	0.451003	0.118336	-0.197189	RNAct
ENSG00000106638.17	2.64e-12	0.352194	0.115363	-0.198766	RNAct
ENSG00000106682.15	5.35e-20	0.450563	0.0682128	-0.229421	-
ENSG00000106714.17	1.56e-07	0.267895	0.359776	-0.116378	-
ENSG00000106733.21	5.3e-09	0.296809	0.942847	0.00914143	RNAct
ENSG00000106780.9	6.03e-25	0.500193	0.48781	-0.0882951	-
ENSG00000106799.13	2.04e-16	0.408794	0.757167	-0.0394121	RNAct
ENSG00000106803.10	2.8e-13	0.366652	0.188943	-0.166346	-
ENSG00000106829.20	9.41e-30	0.541702	0.0186072	-0.293439	RNAct
ENSG00000106868.17	2.15e-21	0.465399	0.0112578	-0.314925	RNAct
ENSG00000106948.17	1.69e-15	0.39705	0.016822	-0.297875	RNAct
ENSG00000106952.7	3.11e-14	0.380112	0.708917	-0.0475751	-
ENSG00000107036.12	1.97e-23	0.485858	0.0610736	-0.235458	-
ENSG00000107099.16	1.17e-29	0.540951	0.000647166	-0.415145	-
ENSG00000107164.16	5.08e-13	0.362887	0.139546	-0.186737	RNAct
ENSG00000107201.10	7.52e-210	0.961596	0.0026065	-0.370166	-
ENSG00000107223.13	1.92e-10	0.322375	0.582334	-0.0700432	-
ENSG00000107262.26	0.322029	0.0514838	0.584099	-0.0697167	RNAct
ENSG00000107263.18	1.18e-13	0.372015	0.104845	-0.204607	RNAct
ENSG00000107290.14	1.61e-27	0.523125	0.112973	-0.200056	-
ENSG00000107341.5	1.07e-24	0.49787	0.0293527	-0.272533	-
ENSG00000107371.14	2.27e-09	0.30357	0.884261	0.0185604	RNAct
ENSG00000107521.19	1.47e-14	0.384551	0.0282844	-0.274289	-
ENSG00000107551.21	2.83e-19	0.442582	0.0534823	-0.242539	-
ENSG00000107560.12	4.82e-11	0.332351	0.998072	0.000308134	-
ENSG00000107581.13	1.15e-14	0.386022	0.291251	-0.133967	-
ENSG00000107643.16	1.73e-09	0.305723	0.701542	-0.0488389	-
ENSG00000107679.14	3.74e-06	0.237179	0.959342	-0.00650054	-
ENSG00000107738.20	7.4e-22	0.470174	0.0370665	-0.261233	-
ENSG00000107742.13	1.15e-11	0.342348	0.0765079	-0.223012	RNAct
ENSG00000107745.19	8.17e-23	0.479797	0.235623	-0.150369	-
ENSG00000107758.16	1.01e-15	0.399985	0.293636	-0.133313	-
ENSG00000107771.17	1.2e-11	0.342049	0.984922	-0.00240987	RNAct
ENSG00000107798.18	2.71e-14	0.38095	0.0448628	-0.251651	-
ENSG00000107829.15	3.89e-13	0.364579	0.286674	-0.135233	RNAct
ENSG00000107854.6	6.01e-24	0.490814	0.226214	-0.153397	RNAct
ENSG00000107862.6	4.94e-15	0.390936	0.28435	-0.135881	-
ENSG00000107874.11	3e-18	0.430891	0.0323085	-0.267939	RNAct
ENSG00000107897.20	4.6e-21	0.461957	0.174312	-0.171931	RNAct
ENSG00000107929.15	1.82e-20	0.455615	0.0251515	-0.279783	-
ENSG00000107938.18	8.44e-15	0.387823	0.39474	-0.108201	-
ENSG00000107949.17	9.4e-11	0.327573	0.852117	-0.0237675	-
ENSG00000107959.17	2e-12	0.354043	0.399073	-0.107219	-
ENSG00000107960.11	1.1e-16	0.412129	0.338093	-0.121695	RNAct
ENSG00000108010.12	1.2e-09	0.308543	0.703496	-0.0485037	RNAct
ENSG00000108039.18	2.62e-12	0.352266	0.0375013	-0.260657	-
ENSG00000108061.12	1.77e-19	0.444841	0.828098	-0.0276831	-
ENSG00000108064.11	8.46e-09	0.293002	0.740255	-0.0422537	-
ENSG00000108100.18	2.84e-15	0.394123	0.206064	-0.160192	-
ENSG00000108107.15	8.53e-14	0.374008	0.347343	-0.119402	RNAct
ENSG00000108179.14	2.11e-16	0.408595	0.037918	-0.260109	-
ENSG00000108219.15	2.97e-21	0.463939	0.02445	-0.281091	RNAct
ENSG00000108244.17	1.64e-20	0.456105	0.046273	-0.250067	-
ENSG00000108256.9	1.83e-25	0.50495	0.312004	-0.128385	-
ENSG00000108298.12	3.03e-06	0.239332	0.687293	-0.0512943	RNAct
ENSG00000108306.13	7.84e-20	0.448748	0.0303287	-0.270975	RNAct
ENSG00000108312.15	6.4e-15	0.389433	0.152606	-0.180885	RNAct
ENSG00000108344.15	3.43e-17	0.418327	0.076793	-0.222802	RNAct
ENSG00000108349.17	3.37e-20	0.45274	0.0103872	-0.318231	-
ENSG00000108389.9	3.03e-20	0.453249	0.0425766	-0.254308	-
ENSG00000108405.4	1.71e-18	0.433712	0.024185	-0.281594	-
ENSG00000108406.10	8.58e-08	0.273237	0.875099	-0.0200411	-
ENSG00000108424.11	2.44e-52	0.68259	0.00155319	-0.387621	-
ENSG00000108433.17	4.09e-14	0.378474	0.0992125	-0.207924	RNAct
ENSG00000108443.14	1.03e-14	0.386656	0.218391	-0.155983	RNAct
ENSG00000108465.15	4.8e-20	0.451074	0.00246123	-0.372147	-
ENSG00000108468.15	6.39e-15	0.389447	0.335504	-0.122344	RNAct
ENSG00000108474.17	1.98e-08	0.285917	0.211693	-0.158249	-
ENSG00000108510.10	1.07e-25	0.507073	0.0322236	-0.268066	-
ENSG00000108518.8	2.42e-16	0.40786	0.118643	-0.197028	RNAct
ENSG00000108523.16	8.42e-16	0.400974	0.0742594	-0.224692	RNAct
ENSG00000108528.14	4.4e-19	0.440423	0.00746747	-0.331429	RNAct
ENSG00000108559.12	3.26e-12	0.350802	0.499232	-0.0860006	-
ENSG00000108561.8	1.56e-06	0.24606	0.904274	-0.0153343	RNAct
ENSG00000108582.12	8.73e-19	0.437057	0.236161	-0.150198	-
ENSG00000108587.16	1.87e-19	0.444584	0.0236406	-0.282641	-
ENSG00000108588.14	5.12e-19	0.439683	0.235992	-0.150252	RNAct
ENSG00000108590.11	3.59e-11	0.334423	0.980643	-0.00309381	-
ENSG00000108591.10	1.03e-13	0.372874	0.0542609	-0.241776	-
ENSG00000108592.17	5.6e-16	0.40324	0.0288428	-0.273365	-
ENSG00000108599.15	5.43e-23	0.481548	0.16931	-0.173918	-
ENSG00000108604.16	7.69e-20	0.448844	0.0551734	-0.240894	RNAct
ENSG00000108622.11	9.65e-17	0.412828	0.0359043	-0.262802	RNAct
ENSG00000108639.8	2.55e-22	0.474871	0.0731956	-0.225501	RNAct
ENSG00000108651.10	6.04e-17	0.415328	0.395557	-0.108016	-
ENSG00000108654.16	7.88e-16	0.401349	0.346855	-0.119522	-
ENSG00000108669.16	4.9e-22	0.471995	0.0156858	-0.300913	RNAct
ENSG00000108671.11	1.87e-16	0.409252	0.0418203	-0.255213	RNAct
ENSG00000108771.13	5.52e-93	0.823195	0.0067106	-0.335586	-
ENSG00000108774.15	6.88e-25	0.499668	0.013237	-0.308163	RNAct
ENSG00000108788.12	1.95e-21	0.465845	0.031254	-0.269536	RNAct
ENSG00000108798.9	2.78e-15	0.394227	0.116361	-0.198232	RNAct
ENSG00000108799.13	1.37e-19	0.446073	0.13139	-0.190603	-
ENSG00000108819.11	3.48e-14	0.379444	0.0217909	-0.286359	-
ENSG00000108826.16	2.51e-10	0.3204	0.361914	-0.115865	-
ENSG00000108829.10	5.29e-21	0.461321	0.0638867	-0.233014	-
ENSG00000108840.15	6.62e-14	0.375558	0.0159664	-0.300146	-
ENSG00000108848.16	1.26e-09	0.308152	0.531036	-0.07975	-
ENSG00000108883.13	2.98e-13	0.366261	0.171812	-0.172919	-
ENSG00000108946.15	9.96e-19	0.436404	0.0860496	-0.216292	-
ENSG00000108950.12	8.23e-23	0.479766	0.0673174	-0.230149	-
ENSG00000108953.17	9e-19	0.436906	0.401102	-0.10676	-
ENSG00000108960.9	7.95e-09	0.293506	0.0878255	-0.215107	RNAct
ENSG00000108984.15	1.05e-57	0.707344	0.0118075	-0.31295	-
ENSG00000109016.17	2.87e-17	0.419266	0.114718	-0.199111	RNAct
ENSG00000109046.15	1.44e-42	0.630176	0.0575969	-0.238606	-
ENSG00000109062.12	2.73e-14	0.380885	0.0315059	-0.269151	RNAct
ENSG00000109065.12	1.48e-13	0.370601	0.00822025	-0.327645	-
ENSG00000109103.12	9.32e-21	0.458721	0.0185241	-0.293637	RNAct
ENSG00000109111.15	2.26e-15	0.395403	0.0178323	-0.295318	-
ENSG00000109118.14	7.06e-18	0.426529	0.0576481	-0.238559	RNAct
ENSG00000109133.13	1.86e-22	0.476242	0.0532941	-0.242724	-
ENSG00000109171.15	4.29e-14	0.378177	0.330136	-0.1237	-
ENSG00000109180.15	4.6e-14	0.377759	0.485576	-0.0887473	RNAct
ENSG00000109220.11	1.21e-21	0.46798	0.250327	-0.145799	RNAct
ENSG00000109270.13	3.65e-12	0.350064	0.788312	-0.0342276	-
ENSG00000109320.13	2.16e-26	0.513284	0.0168925	-0.297692	-
ENSG00000109323.11	6.78e-22	0.470562	0.0125168	-0.310516	-
ENSG00000109332.20	5.6e-27	0.518443	0.0410539	-0.256144	RNAct
ENSG00000109381.20	3.8e-25	0.50205	0.107393	-0.203152	-
ENSG00000109390.13	7.63e-11	0.329074	0.0962373	-0.209736	-
ENSG00000109445.11	4.61e-15	0.391337	0.675981	-0.0532567	-
ENSG00000109452.12	9.84e-07	0.250567	0.634434	0.0605762	-
ENSG00000109466.14	3.05e-20	0.453213	0.549265	-0.0762515	RNAct
ENSG00000109475.16	0.465283	0.037972	0.908718	-0.0146194	-
ENSG00000109519.13	2.8e-14	0.380735	0.308158	-0.129401	-
ENSG00000109536.12	8.53e-08	0.273288	0.62596	-0.0620925	-
ENSG00000109572.14	2.82e-14	0.380695	0.0828386	-0.218484	-
ENSG00000109586.12	1.03e-18	0.436237	0.605943	-0.0657095	-
ENSG00000109606.13	1.16e-13	0.372123	0.914921	-0.0136221	-
ENSG00000109670.16	3.09e-11	0.335472	0.408269	-0.105153	RNAct
ENSG00000109685.19	2.38e-11	0.337315	0.0382492	-0.259678	-
ENSG00000109689.18	9.8e-15	0.386951	0.289224	-0.134526	RNAct
ENSG00000109736.15	2.72e-13	0.36682	0.00842099	-0.326688	RNAct
ENSG00000109743.11	6.96e-34	0.573277	0.0287602	-0.2735	RNAct
ENSG00000109756.9	1.19e-21	0.468063	0.210322	-0.158718	-
ENSG00000109787.13	1.69e-18	0.433768	0.161883	-0.17695	RNAct
ENSG00000109790.16	2.63e-20	0.453907	0.7431	-0.0417744	-
ENSG00000109854.14	4.89e-31	0.551887	0.095317	-0.210305	RNAct
ENSG00000109861.17	5.19e-21	0.461404	0.0681462	-0.229475	-
ENSG00000109911.19	5.32e-09	0.296781	0.727793	-0.0443607	-
ENSG00000109917.11	7.74e-10	0.311926	0.376084	-0.112507	-
ENSG00000109919.10	4.18e-10	0.316594	0.454574	-0.0951393	RNAct
ENSG00000109920.13	1.38e-13	0.371042	0.378202	-0.112012	-
ENSG00000110031.13	2.26e-15	0.395417	0.0808801	-0.219855	-
ENSG00000110047.18	6.53e-17	0.414915	0.0149893	-0.30287	-
ENSG00000110057.8	8.36e-90	0.815262	0.000803536	-0.408555	RNAct
ENSG00000110066.15	3.46e-19	0.441603	0.437711	-0.0987164	RNAct
ENSG00000110075.15	5.86e-20	0.450136	0.24038	-0.148869	-
ENSG00000110077.14	1.01e-29	0.541451	0.0916033	-0.212647	-
ENSG00000110107.9	4.31e-12	0.348952	0.222953	-0.154467	-
ENSG00000110172.12	1.34e-10	0.32499	0.910344	-0.0143579	-
ENSG00000110203.9	0.000201452	0.191584	0.328464	-0.124125	-
ENSG00000110274.16	9.25e-21	0.458755	0.00655111	-0.336514	-
ENSG00000110315.7	6.51e-15	0.389337	0.688447	-0.0510947	-
ENSG00000110321.19	1.57e-20	0.456301	0.201172	-0.161912	-
ENSG00000110324.11	1.26e-17	0.423544	0.0204606	-0.289203	-
ENSG00000110330.8	5.07e-16	0.403797	0.0278245	-0.275063	RNAct
ENSG00000110344.10	1.34e-22	0.477671	0.0712523	-0.227004	-
ENSG00000110367.13	1.13e-15	0.399335	0.348744	-0.119058	-
ENSG00000110395.7	9.09e-24	0.48909	0.00709677	-0.333416	-
ENSG00000110422.12	1.73e-24	0.49594	0.0330217	-0.266883	-
ENSG00000110429.14	4.86e-10	0.315468	0.865392	-0.0216128	-
ENSG00000110442.12	1.56e-17	0.422458	0.12052	-0.19605	-
ENSG00000110446.11	1.34e-23	0.48748	0.045387	-0.251058	RNAct
ENSG00000110514.19	8.42e-16	0.400978	0.00280172	-0.367654	RNAct
ENSG00000110651.12	1.77e-12	0.354849	0.147368	-0.183185	RNAct
ENSG00000110665.12	1.93e-20	0.455361	0.00517453	-0.345474	-
ENSG00000110696.10	4.88e-07	0.257632	0.538994	-0.0782157	RNAct
ENSG00000110697.13	2.96e-11	0.336218	0.021074	-0.287873	-
ENSG00000110700.7	0.0619093	0.0970256	0.912788	-0.0139649	-
ENSG00000110713.17	2.53e-19	0.44365	0.206859	-0.159915	-
ENSG00000110717.13	5.03e-14	0.377689	0.0849483	-0.217036	-
ENSG00000110719.10	4.68e-21	0.462432	0.0125742	-0.310324	-
ENSG00000110768.12	2.51e-14	0.38187	0.676239	-0.0532119	-
ENSG00000110801.14	8.83e-16	0.401207	0.0860964	-0.21626	RNAct
ENSG00000110852.4	2.02e-20	0.455689	0.522131	-0.0814806	-
ENSG00000110876.10	3.75e-22	0.473742	0.0310096	-0.269912	-
ENSG00000110880.11	6.36e-16	0.403037	0.306928	-0.129727	-
ENSG00000110888.17	5.98e-11	0.331238	0.478207	-0.0902463	-
ENSG00000110911.16	3.05e-12	0.351694	0.0976798	-0.208852	RNAct
ENSG00000110931.19	8.42e-24	0.489986	0.00824036	-0.327548	RNAct
ENSG00000110934.13	6.58e-27	0.518429	0.0296327	-0.272082	RNAct
ENSG00000110958.16	3.14e-13	0.366394	0.400712	-0.106848	-
ENSG00000111011.18	2.32e-17	0.420892	0.434127	-0.0994866	-
ENSG00000111052.7	4.55e-20	0.451874	0.657196	-0.0565435	-
ENSG00000111058.8	3.57e-18	0.430533	0.94938	0.00809514	-
ENSG00000111142.14	0.00014029	0.196417	0.913023	0.0139271	-
ENSG00000111144.10	4.87e-22	0.472586	0.212502	-0.157972	-
ENSG00000111203.13	1.1e-11	0.343061	0.0918267	-0.212504	-
ENSG00000111224.14	3.85e-42	0.628291	0.0100492	-0.319579	-
ENSG00000111229.16	1.31e-20	0.457705	0.233898	-0.150918	-
ENSG00000111237.19	7.2e-17	0.414905	0.436423	-0.0989927	RNAct
ENSG00000111252.11	2.5e-23	0.485409	0.00319436	-0.36304	RNAct
ENSG00000111269.3	8.09e-12	0.345158	0.244484	-0.147592	-
ENSG00000111271.15	3.85e-16	0.405819	0.0783879	-0.221638	-
ENSG00000111276.11	7.52e-16	0.402108	0.251101	-0.145563	RNAct
ENSG00000111321.11	2.53e-20	0.454626	0.0287832	-0.273463	RNAct
ENSG00000111331.13	9.1e-76	0.775718	0.00717499	-0.33299	RNAct
ENSG00000111335.13	1.44e-92	0.822779	0.00559224	-0.342553	-
ENSG00000111348.9	1.25e-19	0.447077	0.163766	-0.176172	-
ENSG00000111361.13	6.32e-15	0.389996	0.0543954	-0.241645	RNAct
ENSG00000111371.16	8.53e-07	0.252281	0.872682	-0.0204322	-
ENSG00000111481.10	2.97e-16	0.407232	0.0844851	-0.217352	-
ENSG00000111530.13	2.42e-09	0.303463	0.88109	-0.0190727	-
ENSG00000111540.16	8.14e-16	0.401665	0.0536834	-0.242341	-
ENSG00000111554.14	6.48e-15	0.389849	0.321639	-0.125874	-
ENSG00000111581.10	6.91e-10	0.313201	0.425765	-0.101297	-
ENSG00000111596.14	9.12e-12	0.344337	0.598439	-0.0670787	-
ENSG00000111605.18	7.03e-10	0.313064	0.783244	-0.0350673	-
ENSG00000111615.14	3.72e-10	0.317879	0.853014	0.0236216	-
ENSG00000111640.15	2.67e-17	0.420158	0.093646	-0.21135	-
ENSG00000111641.12	3.6e-11	0.334829	0.0599727	-0.236439	-
ENSG00000111642.16	9.21e-19	0.43732	0.0132055	-0.308264	-
ENSG00000111647.13	2.88e-21	0.464647	0.421831	-0.102157	RNAct
ENSG00000111652.10	3.61e-18	0.43048	0.0728291	-0.225782	RNAct
ENSG00000111653.20	1.39e-19	0.446556	0.127302	-0.19261	-
ENSG00000111667.14	3.41e-08	0.281651	0.969358	-0.00489821	-
ENSG00000111678.11	0.152684	0.0743959	0.850533	-0.0240249	-
ENSG00000111679.17	4.28e-21	0.46284	0.014728	-0.303624	-
ENSG00000111707.12	2.21e-23	0.485939	0.0318749	-0.26859	RNAct
ENSG00000111711.10	0.00148798	0.164374	0.613756	0.0642916	-
ENSG00000111716.14	0.00391321	0.149448	0.776736	0.0361478	RNAct
ENSG00000111725.11	1.23e-11	0.342287	0.248897	-0.146235	-
ENSG00000111729.14	2.63e-20	0.454447	0.358338	-0.116725	-
ENSG00000111731.12	1.43e-16	0.411232	0.843898	-0.0251047	-
ENSG00000111737.12	5.2e-21	0.461953	0.00194432	-0.380164	-
ENSG00000111775.3	4.13e-15	0.392451	0.0373519	-0.260854	-
ENSG00000111790.14	1.76e-10	0.323418	0.736214	-0.0429356	-
ENSG00000111796.4	0.0258391	0.115706	0.644174	-0.0588436	-
ENSG00000111801.16	1.78e-23	0.486843	0.0216015	-0.286755	-
ENSG00000111802.14	1.3e-23	0.488155	0.137295	-0.187787	-
ENSG00000111817.19	4.68e-20	0.451736	0.512	-0.0834678	-
ENSG00000111843.14	2.62e-05	0.216414	0.958975	0.00655912	-
ENSG00000111859.17	5.44e-27	0.51915	0.0579834	-0.238249	-
ENSG00000111860.14	6.33e-12	0.346814	0.448085	-0.0965069	RNAct
ENSG00000111875.8	1.26e-08	0.290103	0.690456	-0.0507476	-
ENSG00000111877.17	3.38e-18	0.430812	0.231816	-0.151584	-
ENSG00000111885.7	2.9e-23	0.484787	0.0529266	-0.243088	RNAct
ENSG00000111897.7	7.88e-13	0.360528	0.969905	-0.00481077	-
ENSG00000111913.20	3.46e-27	0.520863	0.0208875	-0.288274	-
ENSG00000112062.11	2.23e-44	0.64136	0.00631677	-0.337914	RNAct
ENSG00000112078.14	4.02e-17	0.418005	0.0945091	-0.210809	-
ENSG00000112079.9	3.3e-24	0.49386	0.0408962	-0.256337	-
ENSG00000112081.17	2.2e-10	0.321773	0.786588	-0.0345132	-
ENSG00000112096.19	2.24e-24	0.495454	0.022393	-0.285121	RNAct
ENSG00000112110.10	3.31e-09	0.300968	0.274725	-0.138602	-
ENSG00000112137.18	1.09e-11	0.343149	0.335507	-0.122343	-
ENSG00000112146.17	5.9e-09	0.29633	0.438269	-0.0985967	-
ENSG00000112195.9	3.38e-26	0.51216	0.0393664	-0.258246	-
ENSG00000112200.17	1.05e-10	0.327217	0.634197	0.0606185	RNAct
ENSG00000112237.13	3.42e-06	0.238413	0.836099	0.0263762	RNAct
ENSG00000112245.12	3.25e-53	0.68747	0.032144	-0.268185	-
ENSG00000112249.14	1.77e-07	0.267067	0.877055	0.0197248	-
ENSG00000112282.18	4.61e-15	0.391827	0.300537	-0.131439	-
ENSG00000112297.18	1.31e-18	0.435586	0.680199	-0.0525235	-
ENSG00000112303.14	6.29e-16	0.403096	0.482541	-0.0893631	-
ENSG00000112306.8	0.567123	0.029806	0.953848	-0.00737973	RNAct
ENSG00000112308.13	1.91e-28	0.531579	0.143368	-0.184984	-
ENSG00000112335.15	2.57e-05	0.216618	0.393958	-0.108379	RNAct
ENSG00000112339.15	7.84e-08	0.274395	0.718011	-0.0460229	-
ENSG00000112343.11	1.1e-70	0.75875	0.000951621	-0.40331	-
ENSG00000112367.12	3.06e-24	0.494172	0.191248	-0.165495	-
ENSG00000112406.5	7.83e-27	0.51777	0.178136	-0.170439	RNAct
ENSG00000112473.18	1.67e-19	0.445671	0.0106508	-0.317205	RNAct
ENSG00000112511.18	1.99e-18	0.433485	0.0244458	-0.281099	-
ENSG00000112531.17	7.25e-27	0.518061	0.0692752	-0.228566	RNAct
ENSG00000112584.14	2.67e-19	0.443393	0.0760322	-0.223365	RNAct
ENSG00000112667.13	0.000137709	0.19665	0.639587	-0.0596582	RNAct
ENSG00000112685.14	1.85e-14	0.383706	0.43278	-0.099777	-
ENSG00000112695.11	0.000207071	0.191486	0.480484	-0.0897818	-
ENSG00000112697.17	1.64e-21	0.467182	0.593789	-0.0679309	-
ENSG00000112701.18	1.88e-16	0.409732	0.507951	-0.0842674	RNAct
ENSG00000112739.17	3.71e-16	0.406021	0.323075	-0.125504	-
ENSG00000112763.17	9.67e-26	0.508057	0.00264243	-0.369691	-
ENSG00000112799.9	1.09e-13	0.372997	0.415688	-0.103507	-
ENSG00000112851.15	8.97e-21	0.459449	0.261965	-0.14231	-
ENSG00000112855.17	7.29e-19	0.438481	0.0167391	-0.29809	-
ENSG00000112893.9	2.46e-13	0.367917	0.399888	-0.107035	-
ENSG00000112972.15	1.04e-14	0.387112	0.461844	-0.0936197	-
ENSG00000112983.18	6.53e-18	0.427451	0.0243822	-0.281219	-
ENSG00000112992.18	5.28e-13	0.363096	0.28356	-0.136102	-
ENSG00000112996.11	5.7e-10	0.314658	0.837557	-0.0261382	-
ENSG00000113013.16	1.81e-12	0.355153	0.363472	-0.115492	-
ENSG00000113048.17	4.31e-11	0.333559	0.761288	-0.0387226	-
ENSG00000113088.6	0.0453485	0.103977	0.902674	-0.015592	-
ENSG00000113108.19	4.89e-20	0.451536	0.00945952	-0.322029	RNAct
ENSG00000113119.13	9.6e-14	0.373752	0.110861	-0.201214	RNAct
ENSG00000113140.11	5.52e-12	0.347737	0.0623541	-0.234334	-
ENSG00000113141.18	6.63e-16	0.402805	0.0717171	-0.226641	-
ENSG00000113161.16	1.19e-13	0.372445	0.83592	0.0264053	-
ENSG00000113194.13	9.49e-19	0.437174	0.0988814	-0.208124	-
ENSG00000113240.13	5.39e-13	0.362965	0.590561	0.0685243	-
ENSG00000113263.13	2.03e-08	0.286072	0.516657	-0.082552	-
ENSG00000113282.14	5.68e-15	0.390617	0.25124	-0.145521	RNAct
ENSG00000113303.12	1.07e-21	0.469095	0.0357748	-0.262979	-
ENSG00000113312.11	1.36e-16	0.41147	0.115102	-0.198905	-
ENSG00000113328.19	3.9e-08	0.280509	0.446516	-0.0968392	RNAct
ENSG00000113360.16	1.06e-09	0.309949	0.204108	-0.160876	-
ENSG00000113368.12	8.19e-32	0.558495	0.201899	-0.161655	RNAct
ENSG00000113369.9	6.26e-18	0.427668	0.427382	-0.100946	-
ENSG00000113384.14	4.47e-20	0.451958	0.0176658	-0.295731	-
ENSG00000113387.12	0.00706388	0.139641	0.594458	0.0678082	-
ENSG00000113391.19	8.12e-16	0.40168	0.932211	0.0108464	-
ENSG00000113441.16	2.2e-19	0.444346	0.135555	-0.188607	-
ENSG00000113532.13	3.11e-27	0.521261	0.0978793	-0.208731	-
ENSG00000113558.19	5.12e-09	0.297479	0.891986	-0.0173139	-
ENSG00000113575.10	5.27e-17	0.416566	0.343834	-0.120267	-
ENSG00000113580.15	1.74e-20	0.456372	0.197982	-0.16305	-
ENSG00000113583.8	5.74e-16	0.40361	0.421712	-0.102183	-
ENSG00000113593.12	9.96e-11	0.327578	0.891787	0.017346	-
ENSG00000113595.15	5.2e-10	0.315355	0.650958	-0.057643	-
ENSG00000113621.15	7.07e-13	0.361231	0.391374	-0.108969	-
ENSG00000113649.11	1.75e-09	0.306021	0.981488	-0.00295868	-
ENSG00000113658.18	6.28e-11	0.330884	0.48164	-0.0895463	-
ENSG00000113712.19	8.07e-28	0.526293	0.0895379	-0.213982	-
ENSG00000113719.16	4.66e-18	0.429172	0.0880486	-0.214959	RNAct
ENSG00000113732.9	3.31e-20	0.453369	0.0234503	-0.283012	RNAct
ENSG00000113742.14	1.48e-29	0.540714	0.0134238	-0.307571	-
ENSG00000113749.7	1.4e-23	0.487854	0.0128967	-0.30926	-
ENSG00000113810.16	4.96e-12	0.348449	0.666448	-0.0549203	-
ENSG00000113811.11	0.0361075	0.108848	0.849646	-0.0241692	-
ENSG00000113812.14	1.54e-13	0.370857	0.204914	-0.160594	RNAct
ENSG00000113845.10	1.31e-12	0.35725	0.14479	-0.18434	-
ENSG00000113851.14	1.48e-11	0.341039	0.635217	-0.0604364	-
ENSG00000113916.18	1.36e-28	0.532799	0.0229386	-0.284022	-
ENSG00000114013.16	2.09e-23	0.486171	0.100072	-0.207409	-
ENSG00000114030.13	2.3e-21	0.465654	0.247742	-0.146588	-
ENSG00000114062.22	8.03e-11	0.329127	0.2247	-0.153893	-
ENSG00000114098.18	1.29e-14	0.385826	0.359496	0.116446	-
ENSG00000114120.14	0.000443129	0.18148	0.997288	0.000433479	-
ENSG00000114125.14	1.5e-11	0.340911	0.405638	-0.105742	-
ENSG00000114126.18	2.16e-08	0.285556	0.083707	-0.217885	RNAct
ENSG00000114127.11	2.5e-58	0.710732	0.0159952	-0.300067	-
ENSG00000114166.8	2.75e-11	0.336736	0.171318	-0.173115	RNAct
ENSG00000114209.15	1.12e-06	0.249606	0.808866	-0.0308367	RNAct
ENSG00000114268.12	2.61e-29	0.538713	0.00545003	-0.343525	RNAct
ENSG00000114302.16	1.14e-10	0.326602	0.119265	-0.196702	RNAct
ENSG00000114316.13	4.56e-20	0.451859	0.0465228	-0.249791	-
ENSG00000114331.15	1.23e-25	0.50712	0.151652	-0.181299	-
ENSG00000114354.15	1.31e-23	0.48813	0.294886	-0.132971	RNAct
ENSG00000114383.10	2.19e-12	0.353895	0.0776004	-0.22221	RNAct
ENSG00000114388.14	3.5e-12	0.350782	0.0940122	-0.21112	-
ENSG00000114391.13	0.122228	0.0803793	0.966311	0.00538557	-
ENSG00000114395.11	5.57e-15	0.390728	0.0533884	-0.242631	RNAct
ENSG00000114416.18	1.56e-14	0.384684	0.726099	-0.044648	-
ENSG00000114423.23	9.74e-08	0.27246	0.942375	-0.00921707	-
ENSG00000114439.19	5.17e-16	0.404183	0.372837	-0.11327	-
ENSG00000114450.11	9.89e-64	0.733025	0.00375228	-0.357285	RNAct
ENSG00000114480.13	1.75e-12	0.355356	0.938572	0.0098266	-
ENSG00000114503.11	2.38e-11	0.337721	0.576178	-0.0711863	RNAct
ENSG00000114573.10	8.7e-17	0.413889	0.123343	-0.194601	-
ENSG00000114626.18	1.05e-15	0.400213	0.0344932	-0.264764	-
ENSG00000114648.12	3.6e-12	0.35059	0.472749	-0.0913644	-
ENSG00000114650.20	7.63e-12	0.345554	0.0156123	-0.301116	-
ENSG00000114686.9	9.6e-07	0.251136	0.86516	-0.0216503	RNAct
ENSG00000114738.11	6.86e-26	0.509401	0.0274562	-0.27569	-
ENSG00000114742.14	4.03e-12	0.349852	0.923807	-0.0121949	-
ENSG00000114744.9	5.24e-13	0.363148	0.446143	-0.0969182	-
ENSG00000114745.13	6.98e-30	0.543363	0.00707234	-0.333551	RNAct
ENSG00000114770.17	7.04e-10	0.313054	0.359007	-0.116563	RNAct
ENSG00000114784.4	3.84e-22	0.47363	0.0127289	-0.309811	-
ENSG00000114796.16	9.06e-15	0.387895	0.401864	-0.106589	-
ENSG00000114850.7	2.9e-10	0.319729	0.425359	-0.101386	-
ENSG00000114857.18	1.08e-12	0.358471	0.60559	-0.0657736	RNAct
ENSG00000114867.22	3.56e-18	0.430544	0.00390692	-0.355825	-
ENSG00000114933.16	7.1e-20	0.449765	0.229808	-0.15223	-
ENSG00000114942.14	0.143039	0.0761831	0.89373	-0.0170328	-
ENSG00000114956.20	1.61e-14	0.384524	0.149925	-0.182055	RNAct
ENSG00000114978.18	4.82e-32	0.560253	0.0148309	-0.303326	-
ENSG00000114982.19	4.81e-16	0.404583	0.0340996	-0.265324	-
ENSG00000115020.17	3.34e-20	0.453334	0.204677	-0.160677	RNAct
ENSG00000115073.8	5.83e-13	0.362457	0.0654333	-0.231708	RNAct
ENSG00000115084.15	3.17e-19	0.442558	0.585067	-0.0695376	RNAct
ENSG00000115085.14	1.09e-10	0.326936	0.0309774	-0.269962	-
ENSG00000115091.12	1.24e-23	0.488374	0.0613199	-0.23524	-
ENSG00000115128.7	8.84e-08	0.273327	0.752355	-0.0402187	-
ENSG00000115145.10	6.59e-21	0.460867	0.913918	0.0137832	-
ENSG00000115165.10	2.88e-20	0.45402	0.263072	-0.141983	-
ENSG00000115204.15	1.7e-14	0.38419	0.0904889	-0.213364	-
ENSG00000115207.13	4.24e-12	0.349506	0.0272313	-0.276076	-
ENSG00000115216.14	2.89e-23	0.484807	0.0327089	-0.267344	-
ENSG00000115232.14	1.88e-18	0.433755	0.245876	-0.147162	RNAct
ENSG00000115233.12	5.87e-06	0.23278	0.825377	0.0281282	-
ENSG00000115234.11	5.12e-19	0.440214	0.0471012	-0.249155	RNAct
ENSG00000115239.24	5.86e-10	0.314451	0.994438	-0.000888872	-
ENSG00000115241.11	1.74e-15	0.397377	0.140158	-0.186454	-
ENSG00000115267.8	2.46e-156	0.924204	0.00443892	-0.351164	RNAct
ENSG00000115268.10	1.69e-07	0.267522	0.424029	-0.101676	RNAct
ENSG00000115271.11	8.07e-29	0.534687	0.137531	-0.187676	RNAct
ENSG00000115275.14	4.63e-16	0.404799	0.00313225	-0.363735	RNAct
ENSG00000115286.20	2.24e-14	0.382556	0.0479395	-0.248246	RNAct
ENSG00000115295.20	7.57e-15	0.388946	0.207552	-0.159675	-
ENSG00000115306.16	1.07e-11	0.343225	0.264559	-0.141546	-
ENSG00000115307.17	2.35e-20	0.454988	0.0375891	-0.260541	RNAct
ENSG00000115310.18	7.41e-19	0.438394	0.330848	-0.123519	RNAct
ENSG00000115317.12	2.1e-18	0.433203	0.0631462	-0.233649	RNAct
ENSG00000115325.13	8.68e-22	0.470025	0.0686836	-0.229041	RNAct
ENSG00000115339.14	6.82e-31	0.551374	0.162689	-0.176616	-
ENSG00000115350.12	1.94e-12	0.354687	0.622805	-0.0626594	RNAct
ENSG00000115355.17	3.84e-13	0.365122	0.408431	-0.105117	-
ENSG00000115368.10	0.0514054	0.101221	0.316537	0.127198	-
ENSG00000115415.20	8.85e-99	0.837277	0.00138221	-0.391426	-
ENSG00000115419.13	2.53e-21	0.46523	0.59085	-0.0684711	RNAct
ENSG00000115421.13	1.68e-22	0.477241	0.147337	-0.183199	-
ENSG00000115425.14	2.18e-09	0.304289	0.209498	-0.159002	-
ENSG00000115446.12	6.01e-16	0.403349	0.4018	-0.106603	RNAct
ENSG00000115464.15	1.53e-19	0.446092	0.394982	-0.108146	-
ENSG00000115484.15	1.06e-11	0.343295	0.381596	-0.111222	-
ENSG00000115486.12	2.93e-15	0.39442	0.00850692	-0.326284	-
ENSG00000115514.12	3.3e-06	0.238785	0.550988	-0.0759237	-
ENSG00000115520.8	4.84e-22	0.472616	0.379169	-0.111787	RNAct
ENSG00000115523.17	1.14e-05	0.225647	0.0393547	-0.25826	-
ENSG00000115524.17	1.22e-13	0.372297	0.686662	-0.0514035	-
ENSG00000115525.18	9.54e-19	0.437147	0.00169311	-0.384778	RNAct
ENSG00000115548.17	5.97e-17	0.415899	0.361157	-0.116046	-
ENSG00000115561.16	1.95e-24	0.496014	0.173383	-0.172297	-
ENSG00000115590.14	3.88e-16	0.405768	0.21614	-0.156739	-
ENSG00000115607.9	2.68e-25	0.504027	0.584748	-0.0695965	-
ENSG00000115649.16	2.38e-10	0.321188	0.0921535	-0.212295	-
ENSG00000115652.15	4.42e-09	0.298658	0.242157	-0.148314	RNAct
ENSG00000115661.14	3.15e-16	0.406918	0.189616	-0.166097	RNAct
ENSG00000115677.17	2.21e-16	0.408844	0.0142602	-0.305004	-
ENSG00000115685.15	3.36e-10	0.318631	0.386427	-0.110105	RNAct
ENSG00000115687.14	0.000325662	0.185593	0.780534	-0.035517	-
ENSG00000115738.10	6.09e-11	0.331107	0.278347	-0.137571	RNAct
ENSG00000115756.13	3.04e-15	0.394207	0.0448318	-0.251686	RNAct
ENSG00000115758.13	0.197037	0.0671265	0.888525	-0.0178723	RNAct
ENSG00000115760.14	2.61e-17	0.42028	0.267994	-0.140543	-
ENSG00000115762.16	2.61e-22	0.47532	0.0348771	-0.264224	RNAct
ENSG00000115808.12	7.91e-18	0.426472	0.143178	-0.18507	-
ENSG00000115825.11	9.49e-14	0.373827	0.747549	-0.0410257	-
ENSG00000115828.17	2.16e-20	0.455366	0.570887	-0.0721733	RNAct
ENSG00000115839.18	7.09e-25	0.500131	0.340023	-0.121214	-
ENSG00000115875.19	2.78e-12	0.352312	0.408284	-0.10515	-
ENSG00000115904.14	6.7e-18	0.427325	0.741972	0.0419643	-
ENSG00000115919.15	1.74e-13	0.370079	0.360538	-0.116195	-
ENSG00000115935.18	1.62e-27	0.523713	0.0242342	-0.2815	RNAct
ENSG00000115942.9	2.16e-16	0.408991	0.169502	-0.173841	-
ENSG00000115944.15	6.21e-14	0.376419	0.290713	-0.134115	RNAct
ENSG00000115947.14	1.05e-09	0.309969	0.99976	-3.83e-05	-
ENSG00000115956.10	3.18e-33	0.569086	0.00753353	-0.331084	-
ENSG00000115966.17	4.29e-19	0.441081	0.435351	-0.0992231	-
ENSG00000115970.18	2.53e-13	0.367752	0.545437	-0.0769814	-
[truncated: 4,290 more rows]

## Sheet: TableS7
Table S7. PD-related pathways for genes associated with EIF2AK2 and its editing event by Metascape (P<0.05 and Q<0.3)
Category	Term	Pathway	P	Q	Description	PubMed
GO Biological Processes	GO:1901224	positive regulation of NIK/NF-kappaB signaling	6.95292e-06	0.090157	The prominent roles of NF-KB in dopaminergic neurodegeneration have been seen among Parkinson patients.	32031074
Reactome Gene Sets	R-HSA-9006934	Signaling by Receptor Tyrosine Kinases	8.05803e-06	0.090157	Activation of tyrosine kinase receptor signaling pathway by rasagiline facilitates neurorescue and restoration of nigrostriatal dopamine neurons in post-MPTP-induced parkinsonism	17055733
GO Biological Processes	GO:1901222	regulation of NIK/NF-kappaB signaling	3.08587e-05	0.155239	The prominent roles of NF-KB in dopaminergic neurodegeneration have been seen among Parkinson patients.	32031074
GO Biological Processes	GO:0080135	regulation of cellular response to stress	3.86508e-05	0.155239	Oxidative stress plays an important role in the degeneration of dopaminergic neurons in Parkinson’s disease (PD)	24252804
Reactome Gene Sets	R-HSA-1280215	Cytokine Signaling in Immune system	3.96771e-05	0.155239	Immune dysregulation can cause the upregulation of inflammatory cytokines to initiate a cascade of pro-inflammatory signaling that ultimately result in the neurotoxicity related to Parkinson’s disease.	35246670
Reactome Gene Sets	R-HSA-114608	Platelet degranulation	4.96439e-05	0.155239	The platelet structural alterations, as well as functional abnormalities, are evident in PD.	35798236
KEGG Pathway	hsa05010	Alzheimer disease	5.38475e-05	0.155239	neurodegeneration
Reactome Gene Sets	R-HSA-76005	Response to elevated platelet cytosolic Ca2+	5.55951e-05	0.155239	The platelet structural alterations, as well as functional abnormalities, are evident in PD.	35798236
GO Biological Processes	GO:0051092	positive regulation of NF-kappaB transcription factor activity	9.24018e-05	0.218273	The prominent roles of NF-KB in dopaminergic neurodegeneration have been seen among Parkinson patients.	32031074

## Sheet: TableS8
TableS8. A-to-I RNA editing events may alter miRNA competitions between their host genes and other genes.
Editing	Host gene						miRNA	miRNA competing gene
	ENSG	GeneName	FDR	Beta	P	R		ENSG	GeneName	RegulatoryType	FDR	Beta	P	R
chr22_35661178_+	ENSG00000221963.6	APOL6	0.000183861	8.54509	7.12672e-08	0.287494	hsa-miR-19a-5p	ENSG00000156508.19	EEF1A1	trans	0.00228671	-609.931	6.3745e-07	-0.266146
chr22_35661178_+	ENSG00000221963.6	APOL6	0.000183861	8.54509	7.12672e-08	0.287494	hsa-miR-19b-1-5p	ENSG00000156508.19	EEF1A1	trans	0.00228671	-609.931	6.3745e-07	-0.266146
chr22_35661178_+	ENSG00000221963.6	APOL6	0.000183861	8.54509	7.12672e-08	0.287494	hsa-miR-19b-2-5p	ENSG00000156508.19	EEF1A1	trans	0.00228671	-609.931	6.3745e-07	-0.266146
chr22_35661178_+	ENSG00000221963.6	APOL6	0.000183861	8.54509	7.12672e-08	0.287494	hsa-miR-4659a-5p	ENSG00000156508.19	EEF1A1	trans	0.00228671	-609.931	6.3745e-07	-0.266146
chr22_35661178_+	ENSG00000221963.6	APOL6	0.000183861	8.54509	7.12672e-08	0.287494	hsa-miR-4659b-5p	ENSG00000156508.19	EEF1A1	trans	0.00228671	-609.931	6.3745e-07	-0.266146
chr1_184793456_-	ENSG00000135842.17	NIBAN1	0.0330079	22.364	0.00037946	0.184549	hsa-miR-4526	ENSG00000012124.17	CD22	trans	0.0479619	-4.46712	0.000249107	-0.189862
chr1_184793456_-	ENSG00000135842.17	NIBAN1	0.0330079	22.364	0.00037946	0.184549	hsa-miR-4526	ENSG00000105202.9	FBL	trans	0.0275599	-5.56269	8.48951e-05	-0.203419
chr1_184793456_-	ENSG00000135842.17	NIBAN1	0.0330079	22.364	0.00037946	0.184549	hsa-miR-4526	ENSG00000145592.14	RPL37	trans	0.0149771	-71.7128	2.21755e-05	-0.219463
chr1_184793456_-	ENSG00000135842.17	NIBAN1	0.0330079	22.364	0.00037946	0.184549	hsa-miR-4526	ENSG00000174444.15	RPL4	trans	0.0277832	-95.8821	5.97463e-05	-0.207934
chr1_184793456_-	ENSG00000135842.17	NIBAN1	0.0330079	22.364	0.00037946	0.184549	hsa-miR-4526	ENSG00000175061.18	SNHG29	trans	0.0338797	-13.7179	6.52262e-05	-0.206882
chr12_10316482_+	ENSG00000134539.17	KLRD1	0.0083041	-12.4563	2.71291e-05	-0.431405	hsa-miR-17-3p	ENSG00000152778.9	IFIT5	trans	0.00858326	6.53165	0.00402387	0.303679
chr14_21460885_-	ENSG00000129472.15	RAB2B	0.00475323	12.7831	6.09432e-06	0.233314	hsa-miR-10399-5p	ENSG00000001167.14	NFYA	trans	0.0432267	-1.73988	8.18618e-05	-0.203589
chr14_21460885_-	ENSG00000129472.15	RAB2B	0.00475323	12.7831	6.09432e-06	0.233314	hsa-miR-10399-5p	ENSG00000001629.10	ANKIB1	trans	0.0103524	-2.14375	4.89193e-06	-0.235322
chr14_21460885_-	ENSG00000129472.15	RAB2B	0.00475323	12.7831	6.09432e-06	0.233314	hsa-miR-10399-5p	ENSG00000005020.13	SKAP2	trans	0.0331615	-4.41559	3.96718e-05	-0.212205
chr14_21460885_-	ENSG00000129472.15	RAB2B	0.00475323	12.7831	6.09432e-06	0.233314	hsa-miR-10399-5p	ENSG00000005175.10	RPAP3	trans	0.03045	-1.66964	3.01031e-05	-0.215397
chr14_21460885_-	ENSG00000129472.15	RAB2B	0.00475323	12.7831	6.09432e-06	0.233314	hsa-miR-10399-5p	ENSG00000005302.19	MSL3	trans	0.00835088	-4.97978	5.06091e-06	-0.234965
chr14_21460885_-	ENSG00000129472.15	RAB2B	0.00475323	12.7831	6.09432e-06	0.233314	hsa-miR-10399-5p	ENSG00000005700.15	IBTK	trans	0.00932618	-1.21136	4.75548e-06	-0.235618
chr14_21460885_-	ENSG00000129472.15	RAB2B	0.00475323	12.7831	6.09432e-06	0.233314	hsa-miR-10399-5p	ENSG00000005812.11	FBXL3	trans	0.0247491	-4.30939	2.59559e-05	-0.217092
chr14_21460885_-	ENSG00000129472.15	RAB2B	0.00475323	12.7831	6.09432e-06	0.233314	hsa-miR-10399-5p	ENSG00000006530.18	AGK	trans	0.0193953	-2.32908	1.17584e-05	-0.225929
chr14_21460885_-	ENSG00000129472.15	RAB2B	0.00475323	12.7831	6.09432e-06	0.233314	hsa-miR-10399-5p	ENSG00000006576.16	PHTF2	trans	0.000748845	-1.82297	2.86704e-08	-0.283887
chr14_21460885_-	ENSG00000129472.15	RAB2B	0.00475323	12.7831	6.09432e-06	0.233314	hsa-miR-10399-5p	ENSG00000007168.14	PAFAH1B1	trans	0.0146441	-4.91571	8.86038e-06	-0.229003
chr14_21460885_-	ENSG00000129472.15	RAB2B	0.00475323	12.7831	6.09432e-06	0.233314	hsa-miR-10399-5p	ENSG00000008988.11	RPS20	trans	0.00142681	-187.521	2.95829e-07	-0.263032
chr14_21460885_-	ENSG00000129472.15	RAB2B	0.00475323	12.7831	6.09432e-06	0.233314	hsa-miR-10399-5p	ENSG00000009413.16	REV3L	trans	0.0150234	-1.94276	1.25413e-05	-0.225223
chr14_21460885_-	ENSG00000129472.15	RAB2B	0.00475323	12.7831	6.09432e-06	0.233314	hsa-miR-10399-5p	ENSG00000009844.16	VTA1	trans	0.00111869	-1.45574	1.06243e-07	-0.272399
chr14_21460885_-	ENSG00000129472.15	RAB2B	0.00475323	12.7831	6.09432e-06	0.233314	hsa-miR-10399-5p	ENSG00000010244.19	ZNF207	trans	0.0232744	-13.6823	2.36559e-05	-0.218146
chr14_21460885_-	ENSG00000129472.15	RAB2B	0.00475323	12.7831	6.09432e-06	0.233314	hsa-miR-10399-5p	ENSG00000011258.16	MBTD1	trans	0.00726049	-1.91047	1.7452e-06	-0.245886
chr14_21460885_-	ENSG00000129472.15	RAB2B	0.00475323	12.7831	6.09432e-06	0.233314	hsa-miR-10399-5p	ENSG00000011275.19	RNF216	trans	0.0104354	-2.07589	6.50504e-06	-0.232312
chr14_21460885_-	ENSG00000129472.15	RAB2B	0.00475323	12.7831	6.09432e-06	0.233314	hsa-miR-10399-5p	ENSG00000011295.16	TTC19	trans	0.00222584	-3.88236	1.7153e-07	-0.268062
chr14_21460885_-	ENSG00000129472.15	RAB2B	0.00475323	12.7831	6.09432e-06	0.233314	hsa-miR-10399-5p	ENSG00000011454.18	RABGAP1	trans	0.0194273	-1.89379	1.43054e-05	-0.223774
chr14_21460885_-	ENSG00000129472.15	RAB2B	0.00475323	12.7831	6.09432e-06	0.233314	hsa-miR-10399-5p	ENSG00000011523.14	CEP68	trans	0.0247693	-1.53889	2.23185e-05	-0.218805
chr14_21460885_-	ENSG00000129472.15	RAB2B	0.00475323	12.7831	6.09432e-06	0.233314	hsa-miR-10399-5p	ENSG00000012124.17	CD22	trans	0.0201827	-3.62911	3.885e-05	-0.212448
chr14_21460885_-	ENSG00000129472.15	RAB2B	0.00475323	12.7831	6.09432e-06	0.233314	hsa-miR-10399-5p	ENSG00000013441.16	CLK1	trans	0.00148941	-13.5252	1.26711e-07	-0.270812
chr14_21460885_-	ENSG00000129472.15	RAB2B	0.00475323	12.7831	6.09432e-06	0.233314	hsa-miR-10399-5p	ENSG00000014824.14	SLC30A9	trans	0.00178228	-2.19234	1.37909e-07	-0.270046
chr14_21460885_-	ENSG00000129472.15	RAB2B	0.00475323	12.7831	6.09432e-06	0.233314	hsa-miR-10399-5p	ENSG00000015133.19	CCDC88C	trans	0.0479003	-8.21036	0.000102328	-0.200862
chr14_21460885_-	ENSG00000129472.15	RAB2B	0.00475323	12.7831	6.09432e-06	0.233314	hsa-miR-10399-5p	ENSG00000015153.15	YAF2	trans	0.00481572	-2.68455	1.35648e-06	-0.248397
chr14_21460885_-	ENSG00000129472.15	RAB2B	0.00475323	12.7831	6.09432e-06	0.233314	hsa-miR-10399-5p	ENSG00000018189.13	RUFY3	trans	0.035413	-1.7092	4.19703e-05	-0.211547
chr14_21460885_-	ENSG00000129472.15	RAB2B	0.00475323	12.7831	6.09432e-06	0.233314	hsa-miR-10399-5p	ENSG00000018510.17	AGPS	trans	0.0370262	-1.24954	1.65383e-05	-0.222166
chr14_21460885_-	ENSG00000129472.15	RAB2B	0.00475323	12.7831	6.09432e-06	0.233314	hsa-miR-10399-5p	ENSG00000020922.13	MRE11	trans	0.0060225	-2.01613	3.0582e-06	-0.240197
chr14_21460885_-	ENSG00000129472.15	RAB2B	0.00475323	12.7831	6.09432e-06	0.233314	hsa-miR-10399-5p	ENSG00000021574.13	SPAST	trans	0.03106	-1.71019	2.1903e-05	-0.219017
chr14_21460885_-	ENSG00000129472.15	RAB2B	0.00475323	12.7831	6.09432e-06	0.233314	hsa-miR-10399-5p	ENSG00000021776.11	AQR	trans	0.021342	-1.49109	1.9876e-05	-0.220111
chr14_21460885_-	ENSG00000129472.15	RAB2B	0.00475323	12.7831	6.09432e-06	0.233314	hsa-miR-10399-5p	ENSG00000023445.16	BIRC3	trans	0.00490449	-4.57252	3.21087e-06	-0.239696
chr14_21460885_-	ENSG00000129472.15	RAB2B	0.00475323	12.7831	6.09432e-06	0.233314	hsa-miR-10399-5p	ENSG00000029363.17	BCLAF1	trans	0.00595601	-12.0168	2.03746e-06	-0.24433
chr14_21460885_-	ENSG00000129472.15	RAB2B	0.00475323	12.7831	6.09432e-06	0.233314	hsa-miR-10399-5p	ENSG00000033867.16	SLC4A7	trans	0.000326593	-2.97724	3.09438e-08	-0.283232
chr14_21460885_-	ENSG00000129472.15	RAB2B	0.00475323	12.7831	6.09432e-06	0.233314	hsa-miR-10399-5p	ENSG00000035115.22	SH3YL1	trans	0.0062271	-3.34386	9.31934e-07	-0.252089
chr14_21460885_-	ENSG00000129472.15	RAB2B	0.00475323	12.7831	6.09432e-06	0.233314	hsa-miR-10399-5p	ENSG00000038002.9	AGA	trans	0.000169584	-1.9022	5.97836e-09	-0.296988
chr14_21460885_-	ENSG00000129472.15	RAB2B	0.00475323	12.7831	6.09432e-06	0.233314	hsa-miR-10399-5p	ENSG00000039123.16	MTREX	trans	0.0252443	-3.36537	1.80214e-05	-0.221208
chr14_21460885_-	ENSG00000129472.15	RAB2B	0.00475323	12.7831	6.09432e-06	0.233314	hsa-miR-10399-5p	ENSG00000039319.17	ZFYVE16	trans	0.0410928	-4.10904	4.95966e-05	-0.209587
chr14_21460885_-	ENSG00000129472.15	RAB2B	0.00475323	12.7831	6.09432e-06	0.233314	hsa-miR-10399-5p	ENSG00000040341.18	STAU2	trans	0.00797962	-2.95652	2.51164e-06	-0.24221
chr14_21460885_-	ENSG00000129472.15	RAB2B	0.00475323	12.7831	6.09432e-06	0.233314	hsa-miR-10399-5p	ENSG00000041802.11	LSG1	trans	0.0171222	-1.71311	1.17529e-05	-0.225934
chr14_21460885_-	ENSG00000129472.15	RAB2B	0.00475323	12.7831	6.09432e-06	0.233314	hsa-miR-10399-5p	ENSG00000042980.13	ADAM28	trans	0.013362	-2.94025	1.57526e-05	-0.222707
chr14_21460885_-	ENSG00000129472.15	RAB2B	0.00475323	12.7831	6.09432e-06	0.233314	hsa-miR-10399-5p	ENSG00000047932.14	GOPC	trans	0.00953782	-1.27017	6.44965e-06	-0.232403
chr14_21460885_-	ENSG00000129472.15	RAB2B	0.00475323	12.7831	6.09432e-06	0.233314	hsa-miR-10399-5p	ENSG00000048649.13	RSF1	trans	0.00584698	-3.96433	7.97206e-07	-0.253608
chr14_21460885_-	ENSG00000129472.15	RAB2B	0.00475323	12.7831	6.09432e-06	0.233314	hsa-miR-10399-5p	ENSG00000049618.24	ARID1B	trans	0.0181712	-7.83131	9.46829e-06	-0.228286
chr14_21460885_-	ENSG00000129472.15	RAB2B	0.00475323	12.7831	6.09432e-06	0.233314	hsa-miR-10399-5p	ENSG00000050130.18	JKAMP	trans	0.0354233	-2.18223	3.45906e-05	-0.213796
chr14_21460885_-	ENSG00000129472.15	RAB2B	0.00475323	12.7831	6.09432e-06	0.233314	hsa-miR-10399-5p	ENSG00000050426.16	LETMD1	trans	0.00752781	-3.24179	2.97726e-06	-0.240472
chr14_21460885_-	ENSG00000129472.15	RAB2B	0.00475323	12.7831	6.09432e-06	0.233314	hsa-miR-10399-5p	ENSG00000051596.10	THOC3	trans	0.00420726	-4.38504	2.28076e-06	-0.243189
chr14_21460885_-	ENSG00000129472.15	RAB2B	0.00475323	12.7831	6.09432e-06	0.233314	hsa-miR-10399-5p	ENSG00000051825.15	MPHOSPH9	trans	0.00425853	-2.49615	3.69762e-07	-0.260943
chr14_21460885_-	ENSG00000129472.15	RAB2B	0.00475323	12.7831	6.09432e-06	0.233314	hsa-miR-10399-5p	ENSG00000052723.12	SIKE1	trans	0.0182435	-2.11741	2.61364e-05	-0.217013
chr14_21460885_-	ENSG00000129472.15	RAB2B	0.00475323	12.7831	6.09432e-06	0.233314	hsa-miR-10399-5p	ENSG00000053770.12	AP5M1	trans	0.0163608	-1.97188	7.35809e-06	-0.230999
chr14_21460885_-	ENSG00000129472.15	RAB2B	0.00475323	12.7831	6.09432e-06	0.233314	hsa-miR-10399-5p	ENSG00000055208.19	TAB2	trans	0.00936861	-3.81821	3.32349e-06	-0.239341
chr14_21460885_-	ENSG00000129472.15	RAB2B	0.00475323	12.7831	6.09432e-06	0.233314	hsa-miR-10399-5p	ENSG00000056586.16	RC3H2	trans	0.0182832	-2.35481	1.13965e-05	-0.226271
chr14_21460885_-	ENSG00000129472.15	RAB2B	0.00475323	12.7831	6.09432e-06	0.233314	hsa-miR-10399-5p	ENSG00000058063.16	ATP11B	trans	0.00331502	-6.9066	5.5244e-07	-0.257138
chr14_21460885_-	ENSG00000129472.15	RAB2B	0.00475323	12.7831	6.09432e-06	0.233314	hsa-miR-10399-5p	ENSG00000058091.17	CDK14	trans	0.00821252	-3.68708	4.25442e-06	-0.236782
chr14_21460885_-	ENSG00000129472.15	RAB2B	0.00475323	12.7831	6.09432e-06	0.233314	hsa-miR-10399-5p	ENSG00000058272.19	PPP1R12A	trans	0.0120399	-8.90474	4.9252e-06	-0.23525
chr14_21460885_-	ENSG00000129472.15	RAB2B	0.00475323	12.7831	6.09432e-06	0.233314	hsa-miR-10399-5p	ENSG00000058673.17	ZC3H11A	trans	0.028934	-5.38003	3.31554e-05	-0.214285
chr14_21460885_-	ENSG00000129472.15	RAB2B	0.00475323	12.7831	6.09432e-06	0.233314	hsa-miR-10399-5p	ENSG00000060339.14	CCAR1	trans	0.00968938	-2.53361	3.43805e-06	-0.238991
chr14_21460885_-	ENSG00000129472.15	RAB2B	0.00475323	12.7831	6.09432e-06	0.233314	hsa-miR-10399-5p	ENSG00000061987.16	MON2	trans	0.0115883	-5.41277	6.26042e-06	-0.232719
chr14_21460885_-	ENSG00000129472.15	RAB2B	0.00475323	12.7831	6.09432e-06	0.233314	hsa-miR-10399-5p	ENSG00000062650.19	WAPL	trans	0.0237816	-2.65143	1.73552e-05	-0.221629
chr14_21460885_-	ENSG00000129472.15	RAB2B	0.00475323	12.7831	6.09432e-06	0.233314	hsa-miR-10399-5p	ENSG00000063046.18	EIF4B	trans	0.00311092	-21.1117	8.162e-07	-0.25338
chr14_21460885_-	ENSG00000129472.15	RAB2B	0.00475323	12.7831	6.09432e-06	0.233314	hsa-miR-10399-5p	ENSG00000063601.17	MTMR1	trans	0.0155338	-2.3125	1.1078e-05	-0.22658
chr14_21460885_-	ENSG00000129472.15	RAB2B	0.00475323	12.7831	6.09432e-06	0.233314	hsa-miR-10399-5p	ENSG00000064607.17	SUGP2	trans	0.0357494	-2.65013	6.94495e-05	-0.205576
chr14_21460885_-	ENSG00000129472.15	RAB2B	0.00475323	12.7831	6.09432e-06	0.233314	hsa-miR-10399-5p	ENSG00000065150.21	IPO5	trans	0.0293422	-1.70637	2.92679e-06	-0.240647
chr14_21460885_-	ENSG00000129472.15	RAB2B	0.00475323	12.7831	6.09432e-06	0.233314	hsa-miR-10399-5p	ENSG00000065243.20	PKN2	trans	0.0256594	-3.98181	1.88214e-05	-0.220722
chr14_21460885_-	ENSG00000129472.15	RAB2B	0.00475323	12.7831	6.09432e-06	0.233314	hsa-miR-10399-5p	ENSG00000065457.10	ADAT1	trans	0.0395937	-3.72125	7.94307e-05	-0.203955
chr14_21460885_-	ENSG00000129472.15	RAB2B	0.00475323	12.7831	6.09432e-06	0.233314	hsa-miR-10399-5p	ENSG00000065615.14	CYB5R4	trans	0.0296298	-4.91066	2.9579e-05	-0.215599
chr14_21460885_-	ENSG00000129472.15	RAB2B	0.00475323	12.7831	6.09432e-06	0.233314	hsa-miR-10399-5p	ENSG00000065809.13	FAM107B	trans	0.0107608	-9.04532	5.34063e-06	-0.234399
chr14_21460885_-	ENSG00000129472.15	RAB2B	0.00475323	12.7831	6.09432e-06	0.233314	hsa-miR-10399-5p	ENSG00000065883.16	CDK13	trans	0.00686866	-7.36021	1.97008e-06	-0.244669
chr14_21460885_-	ENSG00000129472.15	RAB2B	0.00475323	12.7831	6.09432e-06	0.233314	hsa-miR-10399-5p	ENSG00000066294.15	CD84	trans	0.0105376	-3.13209	3.24477e-06	-0.239588
chr14_21460885_-	ENSG00000129472.15	RAB2B	0.00475323	12.7831	6.09432e-06	0.233314	hsa-miR-10399-5p	ENSG00000066422.5	ZBTB11	trans	0.00141111	-2.13645	1.47976e-07	-0.269407
chr14_21460885_-	ENSG00000129472.15	RAB2B	0.00475323	12.7831	6.09432e-06	0.233314	hsa-miR-10399-5p	ENSG00000066427.24	ATXN3	trans	0.0265187	-1.97978	1.07973e-05	-0.22686
chr14_21460885_-	ENSG00000129472.15	RAB2B	0.00475323	12.7831	6.09432e-06	0.233314	hsa-miR-10399-5p	ENSG00000066777.9	ARFGEF1	trans	0.00767461	-3.7899	3.36762e-06	-0.239205
chr14_21460885_-	ENSG00000129472.15	RAB2B	0.00475323	12.7831	6.09432e-06	0.233314	hsa-miR-10399-5p	ENSG00000066933.16	MYO9A	trans	0.0316005	-2.00453	2.08543e-05	-0.21957
chr14_21460885_-	ENSG00000129472.15	RAB2B	0.00475323	12.7831	6.09432e-06	0.233314	hsa-miR-10399-5p	ENSG00000067955.15	CBFB	trans	0.0123342	-3.50672	5.93362e-06	-0.233287
chr14_21460885_-	ENSG00000129472.15	RAB2B	0.00475323	12.7831	6.09432e-06	0.233314	hsa-miR-10399-5p	ENSG00000068796.19	KIF2A	trans	0.00978541	-3.00456	5.82093e-06	-0.23349
chr14_21460885_-	ENSG00000129472.15	RAB2B	0.00475323	12.7831	6.09432e-06	0.233314	hsa-miR-10399-5p	ENSG00000068831.19	RASGRP2	trans	0.0373333	-11.4859	0.000113496	-0.199583
chr14_21460885_-	ENSG00000129472.15	RAB2B	0.00475323	12.7831	6.09432e-06	0.233314	hsa-miR-10399-5p	ENSG00000069974.16	RAB27A	trans	0.0197339	-5.11533	1.27163e-05	-0.225071
chr14_21460885_-	ENSG00000129472.15	RAB2B	0.00475323	12.7831	6.09432e-06	0.233314	hsa-miR-10399-5p	ENSG00000070269.14	TMEM260	trans	0.0100085	-2.70358	8.05619e-07	-0.253506
chr14_21460885_-	ENSG00000129472.15	RAB2B	0.00475323	12.7831	6.09432e-06	0.233314	hsa-miR-10399-5p	ENSG00000070367.16	EXOC5	trans	0.00639272	-2.22558	1.96731e-06	-0.244683
chr14_21460885_-	ENSG00000129472.15	RAB2B	0.00475323	12.7831	6.09432e-06	0.233314	hsa-miR-10399-5p	ENSG00000070756.17	PABPC1	trans	0.0056369	-32.1005	1.47263e-06	-0.247581
chr14_21460885_-	ENSG00000129472.15	RAB2B	0.00475323	12.7831	6.09432e-06	0.233314	hsa-miR-10399-5p	ENSG00000071073.13	MGAT4A	trans	0.0171823	-8.37645	4.40904e-05	-0.21097
chr14_21460885_-	ENSG00000129472.15	RAB2B	0.00475323	12.7831	6.09432e-06	0.233314	hsa-miR-10399-5p	ENSG00000071243.16	ING3	trans	0.00716415	-1.4984	2.40054e-06	-0.24267
chr14_21460885_-	ENSG00000129472.15	RAB2B	0.00475323	12.7831	6.09432e-06	0.233314	hsa-miR-10399-5p	ENSG00000072858.11	SIDT1	trans	0.00483358	-3.96255	1.48229e-06	-0.247516
chr14_21460885_-	ENSG00000129472.15	RAB2B	0.00475323	12.7831	6.09432e-06	0.233314	hsa-miR-10399-5p	ENSG00000073584.20	SMARCE1	trans	0.0206005	-3.54666	1.02445e-05	-0.227432
chr14_21460885_-	ENSG00000129472.15	RAB2B	0.00475323	12.7831	6.09432e-06	0.233314	hsa-miR-10399-5p	ENSG00000074201.9	CLNS1A	trans	0.00142646	-4.15036	1.04688e-07	-0.272531
chr14_21460885_-	ENSG00000129472.15	RAB2B	0.00475323	12.7831	6.09432e-06	0.233314	hsa-miR-10399-5p	ENSG00000074603.19	DPP8	trans	0.0149618	-3.66294	8.26721e-06	-0.229749
chr14_21460885_-	ENSG00000129472.15	RAB2B	0.00475323	12.7831	6.09432e-06	0.233314	hsa-miR-10399-5p	ENSG00000075239.14	ACAT1	trans	0.0226082	-1.60802	1.21317e-05	-0.225587
chr14_21460885_-	ENSG00000129472.15	RAB2B	0.00475323	12.7831	6.09432e-06	0.233314	hsa-miR-10399-5p	ENSG00000075292.19	ZNF638	trans	0.00437098	-12.276	9.04261e-07	-0.252383
chr14_21460885_-	ENSG00000129472.15	RAB2B	0.00475323	12.7831	6.09432e-06	0.233314	hsa-miR-10399-5p	ENSG00000075711.21	DLG1	trans	0.00128104	-3.56858	7.94274e-08	-0.274996
chr14_21460885_-	ENSG00000129472.15	RAB2B	0.00475323	12.7831	6.09432e-06	0.233314	hsa-miR-10399-5p	ENSG00000076641.4	PAG1	trans	0.0341593	-3.59228	7.70745e-05	-0.20432
chr14_21460885_-	ENSG00000129472.15	RAB2B	0.00475323	12.7831	6.09432e-06	0.233314	hsa-miR-10399-5p	ENSG00000077147.16	TM9SF3	trans	0.000304539	-4.26235	1.22422e-08	-0.291081
chr14_21460885_-	ENSG00000129472.15	RAB2B	0.00475323	12.7831	6.09432e-06	0.233314	hsa-miR-10399-5p	ENSG00000077232.18	DNAJC10	trans	0.00909969	-2.26656	6.4467e-06	-0.232408
chr14_21460885_-	ENSG00000129472.15	RAB2B	0.00475323	12.7831	6.09432e-06	0.233314	hsa-miR-10399-5p	ENSG00000077458.13	FAM76B	trans	0.0188717	-2.78182	9.62064e-06	-0.228113
chr14_21460885_-	ENSG00000129472.15	RAB2B	0.00475323	12.7831	6.09432e-06	0.233314	hsa-miR-10399-5p	ENSG00000077684.16	JADE1	trans	0.0309003	-2.23311	3.44111e-05	-0.213856
chr14_21460885_-	ENSG00000129472.15	RAB2B	0.00475323	12.7831	6.09432e-06	0.233314	hsa-miR-10399-5p	ENSG00000077721.16	UBE2A	trans	0.00778986	-2.17246	1.46797e-06	-0.247613
chr14_21460885_-	ENSG00000129472.15	RAB2B	0.00475323	12.7831	6.09432e-06	0.233314	hsa-miR-10399-5p	ENSG00000078043.16	PIAS2	trans	0.0114928	-1.64311	2.98625e-06	-0.240441
chr14_21460885_-	ENSG00000129472.15	RAB2B	0.00475323	12.7831	6.09432e-06	0.233314	hsa-miR-10399-5p	ENSG00000078142.13	PIK3C3	trans	0.00947878	-4.81653	4.21518e-06	-0.236878
chr14_21460885_-	ENSG00000129472.15	RAB2B	0.00475323	12.7831	6.09432e-06	0.233314	hsa-miR-10399-5p	ENSG00000078596.11	ITM2A	trans	0.0114201	-3.41795	7.23602e-06	-0.231177
chr14_21460885_-	ENSG00000129472.15	RAB2B	0.00475323	12.7831	6.09432e-06	0.233314	hsa-miR-10399-5p	ENSG00000079335.20	CDC14A	trans	0.00122477	-4.25199	1.90715e-07	-0.267091
chr14_21460885_-	ENSG00000129472.15	RAB2B	0.00475323	12.7831	6.09432e-06	0.233314	hsa-miR-10399-5p	ENSG00000080371.6	RAB21	trans	0.0178954	-2.97125	1.28295e-05	-0.224973
chr14_21460885_-	ENSG00000129472.15	RAB2B	0.00475323	12.7831	6.09432e-06	0.233314	hsa-miR-10399-5p	ENSG00000080824.19	HSP90AA1	trans	0.000147823	-9.57002	4.66436e-09	-0.299002
chr14_21460885_-	ENSG00000129472.15	RAB2B	0.00475323	12.7831	6.09432e-06	0.233314	hsa-miR-10399-5p	ENSG00000080839.12	RBL1	trans	0.00944199	-1.80099	6.77869e-06	-0.231874
chr14_21460885_-	ENSG00000129472.15	RAB2B	0.00475323	12.7831	6.09432e-06	0.233314	hsa-miR-10399-5p	ENSG00000081059.20	TCF7	trans	0.00476067	-6.9569	3.08243e-06	-0.240116
chr14_21460885_-	ENSG00000129472.15	RAB2B	0.00475323	12.7831	6.09432e-06	0.233314	hsa-miR-10399-5p	ENSG00000081307.14	UBA5	trans	0.0105983	-1.7648	1.26646e-06	-0.249077
chr14_21460885_-	ENSG00000129472.15	RAB2B	0.00475323	12.7831	6.09432e-06	0.233314	hsa-miR-10399-5p	ENSG00000081320.11	STK17B	trans	0.0233017	-14.4332	2.29472e-05	-0.218491
chr14_21460885_-	ENSG00000129472.15	RAB2B	0.00475323	12.7831	6.09432e-06	0.233314	hsa-miR-10399-5p	ENSG00000081665.14	ZNF506	trans	0.000145758	-4.40155	8.31223e-09	-0.294288
chr14_21460885_-	ENSG00000129472.15	RAB2B	0.00475323	12.7831	6.09432e-06	0.233314	hsa-miR-10399-5p	ENSG00000082153.18	BZW1	trans	0.015387	-7.14153	1.14181e-05	-0.22625
chr14_21460885_-	ENSG00000129472.15	RAB2B	0.00475323	12.7831	6.09432e-06	0.233314	hsa-miR-10399-5p	ENSG00000082898.18	XPO1	trans	0.0171503	-5.23988	1.52324e-05	-0.223079
chr14_21460885_-	ENSG00000129472.15	RAB2B	0.00475323	12.7831	6.09432e-06	0.233314	hsa-miR-10399-5p	ENSG00000083312.17	TNPO1	trans	0.0139551	-3.17499	1.7695e-05	-0.221412
chr14_21460885_-	ENSG00000129472.15	RAB2B	0.00475323	12.7831	6.09432e-06	0.233314	hsa-miR-10399-5p	ENSG00000083520.15	DIS3	trans	0.000643116	-1.93901	3.34204e-08	-0.282569
chr14_21460885_-	ENSG00000129472.15	RAB2B	0.00475323	12.7831	6.09432e-06	0.233314	hsa-miR-10399-5p	ENSG00000083535.16	PIBF1	trans	0.00285596	-1.82191	9.0444e-07	-0.252381
chr14_21460885_-	ENSG00000129472.15	RAB2B	0.00475323	12.7831	6.09432e-06	0.233314	hsa-miR-10399-5p	ENSG00000083642.19	PDS5B	trans	0.041695	-2.23555	6.52272e-05	-0.206329
chr14_21460885_-	ENSG00000129472.15	RAB2B	0.00475323	12.7831	6.09432e-06	0.233314	hsa-miR-10399-5p	ENSG00000083799.18	CYLD	trans	0.0123435	-9.70768	9.59291e-06	-0.228144
chr14_21460885_-	ENSG00000129472.15	RAB2B	0.00475323	12.7831	6.09432e-06	0.233314	hsa-miR-10399-5p	ENSG00000083844.10	ZNF264	trans	0.0340318	-3.18871	4.27309e-05	-0.211337
chr14_21460885_-	ENSG00000129472.15	RAB2B	0.00475323	12.7831	6.09432e-06	0.233314	hsa-miR-10399-5p	ENSG00000083896.13	YTHDC1	trans	0.0197401	-7.29432	1.71195e-05	-0.221781
chr14_21460885_-	ENSG00000129472.15	RAB2B	0.00475323	12.7831	6.09432e-06	0.233314	hsa-miR-10399-5p	ENSG00000084072.17	PPIE	trans	0.00441375	-2.01756	1.12683e-06	-0.250229
chr14_21460885_-	ENSG00000129472.15	RAB2B	0.00475323	12.7831	6.09432e-06	0.233314	hsa-miR-10399-5p	ENSG00000084093.19	REST	trans	0.00674085	-2.34281	1.72635e-06	-0.245995
chr14_21460885_-	ENSG00000129472.15	RAB2B	0.00475323	12.7831	6.09432e-06	0.233314	hsa-miR-10399-5p	ENSG00000084623.12	EIF3I	trans	0.00332242	-4.2609	5.66182e-07	-0.256903
chr14_21460885_-	ENSG00000129472.15	RAB2B	0.00475323	12.7831	6.09432e-06	0.233314	hsa-miR-10399-5p	ENSG00000084754.12	HADHA	trans	0.0487836	-4.29319	9.72752e-05	-0.201484
chr14_21460885_-	ENSG00000129472.15	RAB2B	0.00475323	12.7831	6.09432e-06	0.233314	hsa-miR-10399-5p	ENSG00000085224.23	ATRX	trans	0.0194729	-5.81035	2.19348e-05	-0.219001
chr14_21460885_-	ENSG00000129472.15	RAB2B	0.00475323	12.7831	6.09432e-06	0.233314	hsa-miR-10399-5p	ENSG00000086061.16	DNAJA1	trans	0.0303908	-4.09116	3.30713e-05	-0.214315
chr14_21460885_-	ENSG00000129472.15	RAB2B	0.00475323	12.7831	6.09432e-06	0.233314	hsa-miR-10399-5p	ENSG00000087302.9	RTRAF	trans	0.00147823	-3.1926	1.9933e-07	-0.266686
chr14_21460885_-	ENSG00000129472.15	RAB2B	0.00475323	12.7831	6.09432e-06	0.233314	hsa-miR-10399-5p	ENSG00000087470.18	DNM1L	trans	0.00121717	-3.08882	1.29141e-07	-0.270641
chr14_21460885_-	ENSG00000129472.15	RAB2B	0.00475323	12.7831	6.09432e-06	0.233314	hsa-miR-10399-5p	ENSG00000088035.18	ALG6	trans	0.00945027	-1.51523	2.39791e-06	-0.242681
chr14_21460885_-	ENSG00000129472.15	RAB2B	0.00475323	12.7831	6.09432e-06	0.233314	hsa-miR-10399-5p	ENSG00000088179.9	PTPN4	trans	0.0274683	-2.4303	3.02233e-05	-0.215351
chr14_21460885_-	ENSG00000129472.15	RAB2B	0.00475323	12.7831	6.09432e-06	0.233314	hsa-miR-10399-5p	ENSG00000088387.19	DOCK9	trans	0.00773398	-1.73879	6.07841e-06	-0.233032
chr14_21460885_-	ENSG00000129472.15	RAB2B	0.00475323	12.7831	6.09432e-06	0.233314	hsa-miR-10399-5p	ENSG00000088448.14	ANKRD10	trans	0.00290613	-6.8299	3.91757e-07	-0.260399
chr14_21460885_-	ENSG00000129472.15	RAB2B	0.00475323	12.7831	6.09432e-06	0.233314	hsa-miR-10399-5p	ENSG00000089006.17	SNX5	trans	0.00204782	-4.83163	1.31195e-07	-0.270498
chr14_21460885_-	ENSG00000129472.15	RAB2B	0.00475323	12.7831	6.09432e-06	0.233314	hsa-miR-10399-5p	ENSG00000089022.14	MAPKAPK5	trans	0.00552583	-2.33302	1.35257e-06	-0.248426
chr14_21460885_-	ENSG00000129472.15	RAB2B	0.00475323	12.7831	6.09432e-06	0.233314	hsa-miR-10399-5p	ENSG00000089063.15	TMEM230	trans	0.00578774	-3.14361	2.50875e-06	-0.242221
chr14_21460885_-	ENSG00000129472.15	RAB2B	0.00475323	12.7831	6.09432e-06	0.233314	hsa-miR-10399-5p	ENSG00000089775.12	ZBTB25	trans	0.000616139	-2.1693	5.89667e-08	-0.277627
chr14_21460885_-	ENSG00000129472.15	RAB2B	0.00475323	12.7831	6.09432e-06	0.233314	hsa-miR-10399-5p	ENSG00000091009.8	RBM27	trans	0.0445034	-1.35801	5.67507e-05	-0.207991
chr14_21460885_-	ENSG00000129472.15	RAB2B	0.00475323	12.7831	6.09432e-06	0.233314	hsa-miR-10399-5p	ENSG00000091164.13	TXNL1	trans	0.0460453	-1.21306	5.11048e-05	-0.209233
chr14_21460885_-	ENSG00000129472.15	RAB2B	0.00475323	12.7831	6.09432e-06	0.233314	hsa-miR-10399-5p	ENSG00000091409.15	ITGA6	trans	0.0363347	-3.27208	0.000219234	-0.191263
chr14_21460885_-	ENSG00000129472.15	RAB2B	0.00475323	12.7831	6.09432e-06	0.233314	hsa-miR-10399-5p	ENSG00000092108.22	SCFD1	trans	0.0110523	-4.58043	2.25709e-06	-0.243295
chr14_21460885_-	ENSG00000129472.15	RAB2B	0.00475323	12.7831	6.09432e-06	0.233314	hsa-miR-10399-5p	ENSG00000092199.18	HNRNPC	cis	0.00449106	-37.8541	4.00878e-06	-0.237401
chr14_21460885_-	ENSG00000129472.15	RAB2B	0.00475323	12.7831	6.09432e-06	0.233314	hsa-miR-10399-5p	ENSG00000092439.16	TRPM7	trans	0.0012649	-2.45568	7.52325e-08	-0.275477
chr14_21460885_-	ENSG00000129472.15	RAB2B	0.00475323	12.7831	6.09432e-06	0.233314	hsa-miR-10399-5p	ENSG00000092931.11	MFSD11	trans	0.0282056	-1.55436	1.80257e-05	-0.221206
chr14_21460885_-	ENSG00000129472.15	RAB2B	0.00475323	12.7831	6.09432e-06	0.233314	hsa-miR-10399-5p	ENSG00000094975.14	SUCO	trans	0.0274612	-1.93685	3.01009e-05	-0.215398
chr14_21460885_-	ENSG00000129472.15	RAB2B	0.00475323	12.7831	6.09432e-06	0.233314	hsa-miR-10399-5p	ENSG00000095485.18	CWF19L1	trans	0.0423357	-1.53136	0.000101098	-0.201011
chr14_21460885_-	ENSG00000129472.15	RAB2B	0.00475323	12.7831	6.09432e-06	0.233314	hsa-miR-10399-5p	ENSG00000095787.23	WAC	trans	0.0181951	-9.9374	1.32449e-05	-0.224623
chr14_21460885_-	ENSG00000129472.15	RAB2B	0.00475323	12.7831	6.09432e-06	0.233314	hsa-miR-10399-5p	ENSG00000095951.17	HIVEP1	trans	0.0210526	-1.96886	1.50961e-05	-0.223179
chr14_21460885_-	ENSG00000129472.15	RAB2B	0.00475323	12.7831	6.09432e-06	0.233314	hsa-miR-10399-5p	ENSG00000097033.14	SH3GLB1	trans	0.0257632	-3.97845	2.26014e-05	-0.218663
chr14_21460885_-	ENSG00000129472.15	RAB2B	0.00475323	12.7831	6.09432e-06	0.233314	hsa-miR-10399-5p	ENSG00000099246.17	RAB18	trans	0.00267745	-5.32519	3.66031e-07	-0.261039
chr14_21460885_-	ENSG00000129472.15	RAB2B	0.00475323	12.7831	6.09432e-06	0.233314	hsa-miR-10399-5p	ENSG00000099385.12	BCL7C	trans	0.0130014	-2.60089	1.05577e-05	-0.227104
chr14_21460885_-	ENSG00000129472.15	RAB2B	0.00475323	12.7831	6.09432e-06	0.233314	hsa-miR-10399-5p	ENSG00000100038.20	TOP3B	trans	0.00869656	-2.52267	5.07449e-06	-0.234937
chr14_21460885_-	ENSG00000129472.15	RAB2B	0.00475323	12.7831	6.09432e-06	0.233314	hsa-miR-10399-5p	ENSG00000100201.23	DDX17	trans	0.0397164	-54.5183	6.41378e-05	-0.206531
chr14_21460885_-	ENSG00000129472.15	RAB2B	0.00475323	12.7831	6.09432e-06	0.233314	hsa-miR-10399-5p	ENSG00000100422.14	CERK	trans	0.015268	-4.0601	1.0759e-05	-0.226899
chr14_21460885_-	ENSG00000129472.15	RAB2B	0.00475323	12.7831	6.09432e-06	0.233314	hsa-miR-10399-5p	ENSG00000100483.14	VCPKMT	trans	0.0336735	-1.24323	4.0915e-05	-0.211845
chr14_21460885_-	ENSG00000129472.15	RAB2B	0.00475323	12.7831	6.09432e-06	0.233314	hsa-miR-10399-5p	ENSG00000100523.16	DDHD1	trans	0.0261137	-3.01047	2.64712e-05	-0.216868
chr14_21460885_-	ENSG00000129472.15	RAB2B	0.00475323	12.7831	6.09432e-06	0.233314	hsa-miR-10399-5p	ENSG00000100554.12	ATP6V1D	trans	0.0364005	-2.452	3.20433e-05	-0.214679
chr14_21460885_-	ENSG00000129472.15	RAB2B	0.00475323	12.7831	6.09432e-06	0.233314	hsa-miR-10399-5p	ENSG00000100578.18	KIAA0586	trans	0.004468	-1.77879	3.33457e-07	-0.261913
chr14_21460885_-	ENSG00000129472.15	RAB2B	0.00475323	12.7831	6.09432e-06	0.233314	hsa-miR-10399-5p	ENSG00000100664.11	EIF5	trans	0.0255604	-6.06296	2.41094e-05	-0.217931
chr14_21460885_-	ENSG00000129472.15	RAB2B	0.00475323	12.7831	6.09432e-06	0.233314	hsa-miR-10399-5p	ENSG00000100731.16	PCNX1	trans	0.0446372	-7.79257	6.77412e-05	-0.205876
chr14_21460885_-	ENSG00000129472.15	RAB2B	0.00475323	12.7831	6.09432e-06	0.233314	hsa-miR-10399-5p	ENSG00000100811.14	YY1	trans	0.0458899	-3.47884	9.53028e-05	-0.201735
chr14_21460885_-	ENSG00000129472.15	RAB2B	0.00475323	12.7831	6.09432e-06	0.233314	hsa-miR-10399-5p	ENSG00000100815.12	TRIP11	trans	0.00174309	-2.66298	1.90895e-07	-0.267083
chr14_21460885_-	ENSG00000129472.15	RAB2B	0.00475323	12.7831	6.09432e-06	0.233314	hsa-miR-10399-5p	ENSG00000100852.13	ARHGAP5	trans	0.00175167	-1.75839	1.43223e-07	-0.269704
chr14_21460885_-	ENSG00000129472.15	RAB2B	0.00475323	12.7831	6.09432e-06	0.233314	hsa-miR-10399-5p	ENSG00000100865.15	CINP	trans	0.027552	-1.75546	2.20375e-05	-0.218948
chr14_21460885_-	ENSG00000129472.15	RAB2B	0.00475323	12.7831	6.09432e-06	0.233314	hsa-miR-10399-5p	ENSG00000100890.16	PRORP	trans	0.0171763	-1.567	2.53897e-05	-0.217343
chr14_21460885_-	ENSG00000129472.15	RAB2B	0.00475323	12.7831	6.09432e-06	0.233314	hsa-miR-10399-5p	ENSG00000100902.11	PSMA6	trans	0.00338954	-6.13131	4.31882e-07	-0.259479
chr14_21460885_-	ENSG00000129472.15	RAB2B	0.00475323	12.7831	6.09432e-06	0.233314	hsa-miR-10399-5p	ENSG00000100934.15	SEC23A	trans	0.0400989	-2.8238	7.34264e-05	-0.204906
chr14_21460885_-	ENSG00000129472.15	RAB2B	0.00475323	12.7831	6.09432e-06	0.233314	hsa-miR-10399-5p	ENSG00000101191.17	DIDO1	trans	0.0140624	-4.124	9.27314e-06	-0.228511
chr14_21460885_-	ENSG00000129472.15	RAB2B	0.00475323	12.7831	6.09432e-06	0.233314	hsa-miR-10399-5p	ENSG00000101266.19	CSNK2A1	trans	0.034257	-4.55416	3.88649e-05	-0.212444
chr14_21460885_-	ENSG00000129472.15	RAB2B	0.00475323	12.7831	6.09432e-06	0.233314	hsa-miR-10399-5p	ENSG00000101558.14	VAPA	trans	0.0119066	-7.73976	6.27229e-06	-0.232699
chr14_21460885_-	ENSG00000129472.15	RAB2B	0.00475323	12.7831	6.09432e-06	0.233314	hsa-miR-10399-5p	ENSG00000101695.9	RNF125	trans	0.0228433	-1.48736	2.20502e-05	-0.218942
chr14_21460885_-	ENSG00000129472.15	RAB2B	0.00475323	12.7831	6.09432e-06	0.233314	hsa-miR-10399-5p	ENSG00000101745.17	ANKRD12	trans	0.00137539	-6.18705	1.54998e-07	-0.268986
chr14_21460885_-	ENSG00000129472.15	RAB2B	0.00475323	12.7831	6.09432e-06	0.233314	hsa-miR-10399-5p	ENSG00000101752.12	MIB1	trans	0.00870702	-1.86598	3.64381e-06	-0.238391
chr14_21460885_-	ENSG00000129472.15	RAB2B	0.00475323	12.7831	6.09432e-06	0.233314	hsa-miR-10399-5p	ENSG00000101966.13	XIAP	trans	0.0297947	-2.56769	5.40817e-05	-0.208563
chr14_21460885_-	ENSG00000129472.15	RAB2B	0.00475323	12.7831	6.09432e-06	0.233314	hsa-miR-10399-5p	ENSG00000102317.18	RBM3	trans	0.00804245	-12.5812	2.0558e-06	-0.244239
chr14_21460885_-	ENSG00000129472.15	RAB2B	0.00475323	12.7831	6.09432e-06	0.233314	hsa-miR-10399-5p	ENSG00000102531.16	FNDC3A	trans	0.0184002	-1.48712	1.48224e-05	-0.223381
chr14_21460885_-	ENSG00000129472.15	RAB2B	0.00475323	12.7831	6.09432e-06	0.233314	hsa-miR-10399-5p	ENSG00000102786.15	INTS6	trans	0.0100666	-3.47701	2.67094e-06	-0.241583
chr14_21460885_-	ENSG00000129472.15	RAB2B	0.00475323	12.7831	6.09432e-06	0.233314	hsa-miR-10399-5p	ENSG00000102805.16	CLN5	trans	0.00128999	-3.38132	9.50867e-08	-0.273392
chr14_21460885_-	ENSG00000129472.15	RAB2B	0.00475323	12.7831	6.09432e-06	0.233314	hsa-miR-10399-5p	ENSG00000102910.14	LONP2	trans	0.000412277	-3.5623	2.00791e-08	-0.286923
chr14_21460885_-	ENSG00000129472.15	RAB2B	0.00475323	12.7831	6.09432e-06	0.233314	hsa-miR-10399-5p	ENSG00000102978.13	POLR2C	trans	0.00299095	-3.13954	5.26661e-07	-0.257594
chr14_21460885_-	ENSG00000129472.15	RAB2B	0.00475323	12.7831	6.09432e-06	0.233314	hsa-miR-10399-5p	ENSG00000103429.11	BFAR	trans	0.00218208	-2.28294	1.04817e-07	-0.27252
chr14_21460885_-	ENSG00000129472.15	RAB2B	0.00475323	12.7831	6.09432e-06	0.233314	hsa-miR-10399-5p	ENSG00000103479.16	RBL2	trans	0.0296826	-12.6093	6.10319e-05	-0.207124
chr14_21460885_-	ENSG00000129472.15	RAB2B	0.00475323	12.7831	6.09432e-06	0.233314	hsa-miR-10399-5p	ENSG00000103591.13	AAGAB	trans	0.0124379	-1.45222	3.70769e-06	-0.238211
chr14_21460885_-	ENSG00000129472.15	RAB2B	0.00475323	12.7831	6.09432e-06	0.233314	hsa-miR-10399-5p	ENSG00000103978.16	TMEM87A	trans	0.0301163	-2.11377	2.29141e-05	-0.218507
chr14_21460885_-	ENSG00000129472.15	RAB2B	0.00475323	12.7831	6.09432e-06	0.233314	hsa-miR-10399-5p	ENSG00000104205.16	SGK3	trans	0.00631908	-1.58584	1.75922e-06	-0.245806
chr14_21460885_-	ENSG00000129472.15	RAB2B	0.00475323	12.7831	6.09432e-06	0.233314	hsa-miR-10399-5p	ENSG00000104218.16	CSPP1	trans	0.0358801	-2.68219	6.60387e-06	-0.232152
chr14_21460885_-	ENSG00000129472.15	RAB2B	0.00475323	12.7831	6.09432e-06	0.233314	hsa-miR-10399-5p	ENSG00000104408.11	EIF3E	trans	0.000497072	-15.6351	3.42192e-08	-0.282365
chr14_21460885_-	ENSG00000129472.15	RAB2B	0.00475323	12.7831	6.09432e-06	0.233314	hsa-miR-10399-5p	ENSG00000104412.8	EMC2	trans	0.0128936	-2.40197	8.27028e-06	-0.229745
chr14_21460885_-	ENSG00000129472.15	RAB2B	0.00475323	12.7831	6.09432e-06	0.233314	hsa-miR-10399-5p	ENSG00000104660.19	LEPROTL1	trans	0.0329438	-3.56741	8.14589e-05	-0.203649
chr14_21460885_-	ENSG00000129472.15	RAB2B	0.00475323	12.7831	6.09432e-06	0.233314	hsa-miR-10399-5p	ENSG00000105176.18	URI1	trans	0.000201014	-2.58702	1.04501e-08	-0.292397
chr14_21460885_-	ENSG00000129472.15	RAB2B	0.00475323	12.7831	6.09432e-06	0.233314	hsa-miR-10399-5p	ENSG00000105185.12	PDCD5	trans	0.0406402	-2.13333	4.71122e-05	-0.210192
chr14_21460885_-	ENSG00000129472.15	RAB2B	0.00475323	12.7831	6.09432e-06	0.233314	hsa-miR-10399-5p	ENSG00000105372.8	RPS19	trans	0.00127914	-125.355	2.33734e-07	-0.265219
chr14_21460885_-	ENSG00000129472.15	RAB2B	0.00475323	12.7831	6.09432e-06	0.233314	hsa-miR-10399-5p	ENSG00000105793.16	GTPBP10	trans	0.00457647	-1.94943	4.32741e-07	-0.25946
chr14_21460885_-	ENSG00000129472.15	RAB2B	0.00475323	12.7831	6.09432e-06	0.233314	hsa-miR-10399-5p	ENSG00000105829.13	BET1	trans	0.00717502	-1.79266	5.69627e-06	-0.233719
chr14_21460885_-	ENSG00000129472.15	RAB2B	0.00475323	12.7831	6.09432e-06	0.233314	hsa-miR-10399-5p	ENSG00000105856.14	HBP1	trans	0.021338	-8.90545	1.55973e-05	-0.222817
chr14_21460885_-	ENSG00000129472.15	RAB2B	0.00475323	12.7831	6.09432e-06	0.233314	hsa-miR-10399-5p	ENSG00000105866.15	SP4	trans	0.0450074	-1.83233	0.000128672	-0.198024
chr14_21460885_-	ENSG00000129472.15	RAB2B	0.00475323	12.7831	6.09432e-06	0.233314	hsa-miR-10399-5p	ENSG00000106415.13	GLCCI1	trans	0.00377573	-2.09696	2.38722e-07	-0.265024
chr14_21460885_-	ENSG00000129472.15	RAB2B	0.00475323	12.7831	6.09432e-06	0.233314	hsa-miR-10399-5p	ENSG00000106443.17	PHF14	trans	0.000316542	-2.8655	6.87116e-09	-0.295851
chr14_21460885_-	ENSG00000129472.15	RAB2B	0.00475323	12.7831	6.09432e-06	0.233314	hsa-miR-10399-5p	ENSG00000106460.19	TMEM106B	trans	0.000843398	-1.99615	1.03614e-07	-0.272623
chr14_21460885_-	ENSG00000129472.15	RAB2B	0.00475323	12.7831	6.09432e-06	0.233314	hsa-miR-10399-5p	ENSG00000106546.14	AHR	trans	0.0361976	-2.0499	4.84261e-05	-0.209868
chr14_21460885_-	ENSG00000129472.15	RAB2B	0.00475323	12.7831	6.09432e-06	0.233314	hsa-miR-10399-5p	ENSG00000106591.4	MRPL32	trans	0.000834771	-2.27407	4.14031e-08	-0.280716
chr14_21460885_-	ENSG00000129472.15	RAB2B	0.00475323	12.7831	6.09432e-06	0.233314	hsa-miR-10399-5p	ENSG00000106603.19	COA1	trans	0.0356854	-7.80022	4.15694e-05	-0.211659
chr14_21460885_-	ENSG00000129472.15	RAB2B	0.00475323	12.7831	6.09432e-06	0.233314	hsa-miR-10399-5p	ENSG00000106799.13	TGFBR1	trans	0.00737773	-3.33809	1.86415e-06	-0.245225
chr14_21460885_-	ENSG00000129472.15	RAB2B	0.00475323	12.7831	6.09432e-06	0.233314	hsa-miR-10399-5p	ENSG00000107164.16	FUBP3	trans	0.0437224	-1.42177	5.99953e-05	-0.207329
chr14_21460885_-	ENSG00000129472.15	RAB2B	0.00475323	12.7831	6.09432e-06	0.233314	hsa-miR-10399-5p	ENSG00000107560.12	RAB11FIP2	trans	0.00741084	-1.64514	3.27011e-06	-0.239508
chr14_21460885_-	ENSG00000129472.15	RAB2B	0.00475323	12.7831	6.09432e-06	0.233314	hsa-miR-10399-5p	ENSG00000107643.16	MAPK8	trans	0.00213664	-2.1967	2.23466e-07	-0.265634
chr14_21460885_-	ENSG00000129472.15	RAB2B	0.00475323	12.7831	6.09432e-06	0.233314	hsa-miR-10399-5p	ENSG00000107679.14	PLEKHA1	trans	0.00283486	-1.86222	3.65219e-07	-0.26106
chr14_21460885_-	ENSG00000129472.15	RAB2B	0.00475323	12.7831	6.09432e-06	0.233314	hsa-miR-10399-5p	ENSG00000107771.17	CCSER2	trans	0.00143094	-3.28888	1.45044e-07	-0.269589
chr14_21460885_-	ENSG00000129472.15	RAB2B	0.00475323	12.7831	6.09432e-06	0.233314	hsa-miR-10399-5p	ENSG00000107897.20	ACBD5	trans	0.0101983	-1.80219	2.38796e-06	-0.242723
chr14_21460885_-	ENSG00000129472.15	RAB2B	0.00475323	12.7831	6.09432e-06	0.233314	hsa-miR-10399-5p	ENSG00000107960.11	STN1	trans	0.00280812	-1.81086	3.30446e-07	-0.261998
chr14_21460885_-	ENSG00000129472.15	RAB2B	0.00475323	12.7831	6.09432e-06	0.233314	hsa-miR-10399-5p	ENSG00000108587.16	GOSR1	trans	0.0029862	-2.70885	4.54254e-07	-0.259
chr14_21460885_-	ENSG00000129472.15	RAB2B	0.00475323	12.7831	6.09432e-06	0.233314	hsa-miR-10399-5p	ENSG00000108651.10	UTP6	trans	0.0116473	-2.98028	5.74898e-06	-0.233622
chr14_21460885_-	ENSG00000129472.15	RAB2B	0.00475323	12.7831	6.09432e-06	0.233314	hsa-miR-10399-5p	ENSG00000108799.13	EZH1	trans	0.00673334	-5.1322	1.26436e-06	-0.249093
chr14_21460885_-	ENSG00000129472.15	RAB2B	0.00475323	12.7831	6.09432e-06	0.233314	hsa-miR-10399-5p	ENSG00000109180.15	OCIAD1	trans	0.00262696	-3.81065	1.90788e-07	-0.267088
chr14_21460885_-	ENSG00000129472.15	RAB2B	0.00475323	12.7831	6.09432e-06	0.233314	hsa-miR-10399-5p	ENSG00000109452.12	INPP4B	trans	0.0236499	-2.67971	3.73063e-05	-0.21292
chr14_21460885_-	ENSG00000129472.15	RAB2B	0.00475323	12.7831	6.09432e-06	0.233314	hsa-miR-10399-5p	ENSG00000109586.12	GALNT7	trans	0.0243354	-1.93439	1.82127e-05	-0.22109
chr14_21460885_-	ENSG00000129472.15	RAB2B	0.00475323	12.7831	6.09432e-06	0.233314	hsa-miR-10399-5p	ENSG00000109685.19	NSD2	trans	0.045812	-1.63354	8.03626e-05	-0.203814
chr14_21460885_-	ENSG00000129472.15	RAB2B	0.00475323	12.7831	6.09432e-06	0.233314	hsa-miR-10399-5p	ENSG00000109790.16	KLHL5	trans	0.00914317	-1.48046	5.50879e-06	-0.234072
chr14_21460885_-	ENSG00000129472.15	RAB2B	0.00475323	12.7831	6.09432e-06	0.233314	hsa-miR-10399-5p	ENSG00000109911.19	ELP4	trans	0.010284	-1.67647	1.62205e-06	-0.246618
chr14_21460885_-	ENSG00000129472.15	RAB2B	0.00475323	12.7831	6.09432e-06	0.233314	hsa-miR-10399-5p	ENSG00000110075.15	PPP6R3	trans	0.0180098	-6.40384	1.42443e-05	-0.223821
chr14_21460885_-	ENSG00000129472.15	RAB2B	0.00475323	12.7831	6.09432e-06	0.233314	hsa-miR-10399-5p	ENSG00000110172.12	CHORDC1	trans	0.00149719	-3.00598	1.96142e-07	-0.266834
chr14_21460885_-	ENSG00000129472.15	RAB2B	0.00475323	12.7831	6.09432e-06	0.233314	hsa-miR-10399-5p	ENSG00000110321.19	EIF4G2	trans	0.00785435	-15.2614	3.14508e-06	-0.239909
chr14_21460885_-	ENSG00000129472.15	RAB2B	0.00475323	12.7831	6.09432e-06	0.233314	hsa-miR-10399-5p	ENSG00000110429.14	FBXO3	trans	0.00345441	-2.18618	8.35317e-07	-0.253155
chr14_21460885_-	ENSG00000129472.15	RAB2B	0.00475323	12.7831	6.09432e-06	0.233314	hsa-miR-10399-5p	ENSG00000110696.10	C11orf58	trans	0.0286424	-9.5798	3.18848e-05	-0.215023
chr14_21460885_-	ENSG00000129472.15	RAB2B	0.00475323	12.7831	6.09432e-06	0.233314	hsa-miR-10399-5p	ENSG00000110958.16	PTGES3	trans	0.0231815	-3.53397	2.16289e-05	-0.219452
chr14_21460885_-	ENSG00000129472.15	RAB2B	0.00475323	12.7831	6.09432e-06	0.233314	hsa-miR-10399-5p	ENSG00000111530.13	CAND1	trans	0.00152316	-3.95183	1.30112e-07	-0.270929
chr14_21460885_-	ENSG00000129472.15	RAB2B	0.00475323	12.7831	6.09432e-06	0.233314	hsa-miR-10399-5p	ENSG00000111554.14	MDM1	trans	0.0273546	-1.53112	1.24889e-05	-0.225569
chr14_21460885_-	ENSG00000129472.15	RAB2B	0.00475323	12.7831	6.09432e-06	0.233314	hsa-miR-10399-5p	ENSG00000111581.10	NUP107	trans	0.00274103	-2.81813	6.09731e-07	-0.256532
chr14_21460885_-	ENSG00000129472.15	RAB2B	0.00475323	12.7831	6.09432e-06	0.233314	hsa-miR-10399-5p	ENSG00000111596.14	CNOT2	trans	0.0081745	-8.07691	2.27027e-06	-0.243558
chr14_21460885_-	ENSG00000129472.15	RAB2B	0.00475323	12.7831	6.09432e-06	0.233314	hsa-miR-10399-5p	ENSG00000111639.8	MRPL51	trans	0.0204236	-2.51744	8.52345e-06	-0.229726
chr14_21460885_-	ENSG00000129472.15	RAB2B	0.00475323	12.7831	6.09432e-06	0.233314	hsa-miR-10399-5p	ENSG00000111670.16	GNPTAB	trans	0.0310608	-3.19813	3.26788e-05	-0.214739
chr14_21460885_-	ENSG00000129472.15	RAB2B	0.00475323	12.7831	6.09432e-06	0.233314	hsa-miR-10399-5p	ENSG00000111731.12	C2CD5	trans	0.00931442	-2.50159	4.90632e-06	-0.235603
chr14_21460885_-	ENSG00000129472.15	RAB2B	0.00475323	12.7831	6.09432e-06	0.233314	hsa-miR-10399-5p	ENSG00000112237.13	CCNC	trans	0.00513099	-2.08735	1.4217e-06	-0.24826
chr14_21460885_-	ENSG00000129472.15	RAB2B	0.00475323	12.7831	6.09432e-06	0.233314	hsa-miR-10399-5p	ENSG00000112249.14	ASCC3	trans	0.00132229	-3.06632	2.25773e-07	-0.265889
chr14_21460885_-	ENSG00000129472.15	RAB2B	0.00475323	12.7831	6.09432e-06	0.233314	hsa-miR-10399-5p	ENSG00000112339.15	HBS1L	trans	0.00692739	-3.11305	6.18938e-06	-0.23315
chr14_21460885_-	ENSG00000129472.15	RAB2B	0.00475323	12.7831	6.09432e-06	0.233314	hsa-miR-10399-5p	ENSG00000112406.5	HECA	trans	0.0388153	-3.63058	5.87215e-05	-0.207862
chr14_21460885_-	ENSG00000129472.15	RAB2B	0.00475323	12.7831	6.09432e-06	0.233314	hsa-miR-10399-5p	ENSG00000112701.18	SENP6	trans	0.0162807	-7.22646	1.07652e-05	-0.227194
chr14_21460885_-	ENSG00000129472.15	RAB2B	0.00475323	12.7831	6.09432e-06	0.233314	hsa-miR-10399-5p	ENSG00000112739.17	PRPF4B	trans	0.00531832	-3.19531	1.89207e-06	-0.2454
chr14_21460885_-	ENSG00000129472.15	RAB2B	0.00475323	12.7831	6.09432e-06	0.233314	hsa-miR-10399-5p	ENSG00000112851.15	ERBIN	trans	0.0496971	-6.24953	0.000116935	-0.19948
chr14_21460885_-	ENSG00000129472.15	RAB2B	0.00475323	12.7831	6.09432e-06	0.233314	hsa-miR-10399-5p	ENSG00000112983.18	BRD8	trans	0.0250232	-2.65299	2.58585e-05	-0.217425
chr14_21460885_-	ENSG00000129472.15	RAB2B	0.00475323	12.7831	6.09432e-06	0.233314	hsa-miR-10399-5p	ENSG00000113163.18	CERT1	trans	0.0144407	-3.88674	7.51091e-06	-0.231086
chr14_21460885_-	ENSG00000129472.15	RAB2B	0.00475323	12.7831	6.09432e-06	0.233314	hsa-miR-10399-5p	ENSG00000113240.13	CLK4	trans	0.00529862	-6.69951	1.61382e-06	-0.246996
chr14_21460885_-	ENSG00000129472.15	RAB2B	0.00475323	12.7831	6.09432e-06	0.233314	hsa-miR-10399-5p	ENSG00000113387.12	SUB1	trans	0.00201723	-9.31021	1.96688e-07	-0.26716
chr14_21460885_-	ENSG00000129472.15	RAB2B	0.00475323	12.7831	6.09432e-06	0.233314	hsa-miR-10399-5p	ENSG00000113391.19	FAM172A	trans	0.00204613	-2.26997	1.82362e-07	-0.267854
chr14_21460885_-	ENSG00000129472.15	RAB2B	0.00475323	12.7831	6.09432e-06	0.233314	hsa-miR-10399-5p	ENSG00000113441.16	LNPEP	trans	0.0478646	-4.00135	0.00012609	-0.198542
chr14_21460885_-	ENSG00000129472.15	RAB2B	0.00475323	12.7831	6.09432e-06	0.233314	hsa-miR-10399-5p	ENSG00000113621.15	TXNDC15	trans	0.00846433	-2.22398	3.86303e-06	-0.238101
chr14_21460885_-	ENSG00000129472.15	RAB2B	0.00475323	12.7831	6.09432e-06	0.233314	hsa-miR-10399-5p	ENSG00000113658.18	SMAD5	trans	0.00745195	-1.94296	2.59986e-06	-0.242179
chr14_21460885_-	ENSG00000129472.15	RAB2B	0.00475323	12.7831	6.09432e-06	0.233314	hsa-miR-10399-5p	ENSG00000113712.19	CSNK1A1	trans	0.0148232	-5.83047	9.00064e-06	-0.229138
chr14_21460885_-	ENSG00000129472.15	RAB2B	0.00475323	12.7831	6.09432e-06	0.233314	hsa-miR-10399-5p	ENSG00000113845.10	TIMMDC1	trans	0.00228016	-3.14255	2.82842e-07	-0.263798
chr14_21460885_-	ENSG00000129472.15	RAB2B	0.00475323	12.7831	6.09432e-06	0.233314	hsa-miR-10399-5p	ENSG00000114062.22	UBE3A	trans	0.00550657	-4.95334	6.14189e-07	-0.256462
chr14_21460885_-	ENSG00000129472.15	RAB2B	0.00475323	12.7831	6.09432e-06	0.233314	hsa-miR-10399-5p	ENSG00000114120.14	SLC25A36	trans	0.00187619	-2.72913	3.16058e-07	-0.262761
chr14_21460885_-	ENSG00000129472.15	RAB2B	0.00475323	12.7831	6.09432e-06	0.233314	hsa-miR-10399-5p	ENSG00000114416.18	FXR1	trans	0.00163479	-5.21772	2.01558e-07	-0.266935
chr14_21460885_-	ENSG00000129472.15	RAB2B	0.00475323	12.7831	6.09432e-06	0.233314	hsa-miR-10399-5p	ENSG00000114480.13	GBE1	trans	0.0371422	-1.39196	2.75619e-05	-0.216696
chr14_21460885_-	ENSG00000129472.15	RAB2B	0.00475323	12.7831	6.09432e-06	0.233314	hsa-miR-10399-5p	ENSG00000114503.11	NCBP2	trans	0.0341781	-2.37991	8.5541e-05	-0.203327
chr14_21460885_-	ENSG00000129472.15	RAB2B	0.00475323	12.7831	6.09432e-06	0.233314	hsa-miR-10399-5p	ENSG00000114796.16	KLHL24	trans	0.0404851	-3.83156	7.08348e-05	-0.205613
chr14_21460885_-	ENSG00000129472.15	RAB2B	0.00475323	12.7831	6.09432e-06	0.233314	hsa-miR-10399-5p	ENSG00000114850.7	SSR3	trans	0.0127882	-3.53613	7.87544e-06	-0.230577
chr14_21460885_-	ENSG00000129472.15	RAB2B	0.00475323	12.7831	6.09432e-06	0.233314	hsa-miR-10399-5p	ENSG00000114857.18	NKTR	trans	0.0226277	-11.3671	3.25268e-05	-0.214793
chr14_21460885_-	ENSG00000129472.15	RAB2B	0.00475323	12.7831	6.09432e-06	0.233314	hsa-miR-10399-5p	ENSG00000114861.23	FOXP1	trans	0.00442704	-13.7364	2.38188e-06	-0.243071
chr14_21460885_-	ENSG00000129472.15	RAB2B	0.00475323	12.7831	6.09432e-06	0.233314	hsa-miR-10399-5p	ENSG00000114933.16	INO80D	trans	0.0310732	-1.38679	4.09252e-05	-0.212125
chr14_21460885_-	ENSG00000129472.15	RAB2B	0.00475323	12.7831	6.09432e-06	0.233314	hsa-miR-10399-5p	ENSG00000115020.17	PIKFYVE	trans	0.0492781	-1.85635	0.000108918	-0.20036
chr14_21460885_-	ENSG00000129472.15	RAB2B	0.00475323	12.7831	6.09432e-06	0.233314	hsa-miR-10399-5p	ENSG00000115084.15	SLC35F5	trans	0.0315225	-2.58032	3.66955e-05	-0.213396
chr14_21460885_-	ENSG00000129472.15	RAB2B	0.00475323	12.7831	6.09432e-06	0.233314	hsa-miR-10399-5p	ENSG00000115306.16	SPTBN1	trans	0.033274	-2.53278	0.000109773	-0.200264
chr14_21460885_-	ENSG00000129472.15	RAB2B	0.00475323	12.7831	6.09432e-06	0.233314	hsa-miR-10399-5p	ENSG00000115355.17	CCDC88A	trans	0.0154775	-4.1095	6.10181e-06	-0.233301
chr14_21460885_-	ENSG00000129472.15	RAB2B	0.00475323	12.7831	6.09432e-06	0.233314	hsa-miR-10399-5p	ENSG00000115421.13	PAPOLG	trans	0.0309177	-1.28021	4.97639e-05	-0.209827
chr14_21460885_-	ENSG00000129472.15	RAB2B	0.00475323	12.7831	6.09432e-06	0.233314	hsa-miR-10399-5p	ENSG00000115425.14	PECR	trans	0.0289931	-1.31382	4.48513e-05	-0.211051
chr14_21460885_-	ENSG00000129472.15	RAB2B	0.00475323	12.7831	6.09432e-06	0.233314	hsa-miR-10399-5p	ENSG00000115520.8	COQ10B	trans	0.00681725	-2.45161	2.24742e-06	-0.243661
chr14_21460885_-	ENSG00000129472.15	RAB2B	0.00475323	12.7831	6.09432e-06	0.233314	hsa-miR-10399-5p	ENSG00000115524.17	SF3B1	trans	0.00294903	-21.6843	4.53172e-07	-0.259365
chr14_21460885_-	ENSG00000129472.15	RAB2B	0.00475323	12.7831	6.09432e-06	0.233314	hsa-miR-10399-5p	ENSG00000115694.15	STK25	trans	0.0208231	-4.04737	1.61798e-05	-0.222706
chr14_21460885_-	ENSG00000129472.15	RAB2B	0.00475323	12.7831	6.09432e-06	0.233314	hsa-miR-10399-5p	ENSG00000115919.15	KYNU	trans	0.00429885	-1.87285	4.39803e-07	-0.259649
chr14_21460885_-	ENSG00000129472.15	RAB2B	0.00475323	12.7831	6.09432e-06	0.233314	hsa-miR-10399-5p	ENSG00000115966.17	ATF2	trans	0.00313886	-2.79451	5.53378e-07	-0.257461
chr14_21460885_-	ENSG00000129472.15	RAB2B	0.00475323	12.7831	6.09432e-06	0.233314	hsa-miR-10399-5p	ENSG00000115970.18	THADA	trans	0.00512664	-2.33934	2.24847e-06	-0.243656
chr14_21460885_-	ENSG00000129472.15	RAB2B	0.00475323	12.7831	6.09432e-06	0.233314	hsa-miR-10399-5p	ENSG00000115977.20	AAK1	trans	0.0205521	-4.57718	3.45263e-05	-0.214103
chr14_21460885_-	ENSG00000129472.15	RAB2B	0.00475323	12.7831	6.09432e-06	0.233314	hsa-miR-10399-5p	ENSG00000116062.17	MSH6	trans	0.0310778	-1.43117	4.5342e-05	-0.210924
chr14_21460885_-	ENSG00000129472.15	RAB2B	0.00475323	12.7831	6.09432e-06	0.233314	hsa-miR-10399-5p	ENSG00000116161.18	CACYBP	trans	0.00135022	-3.44618	1.43711e-07	-0.270028
chr14_21460885_-	ENSG00000129472.15	RAB2B	0.00475323	12.7831	6.09432e-06	0.233314	hsa-miR-10399-5p	ENSG00000116209.12	TMEM59	trans	0.014881	-11.4417	7.31528e-06	-0.231368
chr14_21460885_-	ENSG00000129472.15	RAB2B	0.00475323	12.7831	6.09432e-06	0.233314	hsa-miR-10399-5p	ENSG00000116406.19	EDEM3	trans	0.0158217	-2.27786	8.7306e-06	-0.229467
chr14_21460885_-	ENSG00000129472.15	RAB2B	0.00475323	12.7831	6.09432e-06	0.233314	hsa-miR-10399-5p	ENSG00000116459.11	ATP5PB	trans	0.00361007	-6.12014	4.11419e-07	-0.26028
chr14_21460885_-	ENSG00000129472.15	RAB2B	0.00475323	12.7831	6.09432e-06	0.233314	hsa-miR-10399-5p	ENSG00000116473.14	RAP1A	trans	0.00839539	-5.18847	3.0156e-06	-0.24066
chr14_21460885_-	ENSG00000129472.15	RAB2B	0.00475323	12.7831	6.09432e-06	0.233314	hsa-miR-10399-5p	ENSG00000116560.11	SFPQ	trans	0.00687256	-13.0727	3.2054e-06	-0.240032
chr14_21460885_-	ENSG00000129472.15	RAB2B	0.00475323	12.7831	6.09432e-06	0.233314	hsa-miR-10399-5p	ENSG00000116679.16	IVNS1ABP	trans	0.0389839	-8.36565	3.89854e-05	-0.212692
chr14_21460885_-	ENSG00000129472.15	RAB2B	0.00475323	12.7831	6.09432e-06	0.233314	hsa-miR-10399-5p	ENSG00000116750.14	UCHL5	trans	0.025438	-1.59658	3.13725e-05	-0.215209
chr14_21460885_-	ENSG00000129472.15	RAB2B	0.00475323	12.7831	6.09432e-06	0.233314	hsa-miR-10399-5p	ENSG00000116918.15	TSNAX	trans	0.012921	-2.51918	6.26618e-06	-0.233019
chr14_21460885_-	ENSG00000129472.15	RAB2B	0.00475323	12.7831	6.09432e-06	0.233314	hsa-miR-10399-5p	ENSG00000117020.18	AKT3	trans	0.000119973	-2.8716	3.40166e-09	-0.301935
chr14_21460885_-	ENSG00000129472.15	RAB2B	0.00475323	12.7831	6.09432e-06	0.233314	hsa-miR-10399-5p	ENSG00000117280.13	RAB29	trans	0.0495376	-2.63487	8.11026e-05	-0.203975
chr14_21460885_-	ENSG00000129472.15	RAB2B	0.00475323	12.7831	6.09432e-06	0.233314	hsa-miR-10399-5p	ENSG00000117500.13	TMED5	trans	0.0180909	-3.00115	1.33915e-05	-0.224801
chr14_21460885_-	ENSG00000129472.15	RAB2B	0.00475323	12.7831	6.09432e-06	0.233314	hsa-miR-10399-5p	ENSG00000117602.13	RCAN3	trans	0.00015835	-2.56584	3.22311e-08	-0.283252
chr14_21460885_-	ENSG00000129472.15	RAB2B	0.00475323	12.7831	6.09432e-06	0.233314	hsa-miR-10399-5p	ENSG00000117616.18	RSRP1	trans	0.0462509	-26.6323	9.34205e-05	-0.20225
chr14_21460885_-	ENSG00000129472.15	RAB2B	0.00475323	12.7831	6.09432e-06	0.233314	hsa-miR-10399-5p	ENSG00000117620.15	SLC35A3	trans	0.00275042	-1.53007	2.61398e-07	-0.264531
chr14_21460885_-	ENSG00000129472.15	RAB2B	0.00475323	12.7831	6.09432e-06	0.233314	hsa-miR-10399-5p	ENSG00000117625.14	RCOR3	trans	0.0149194	-3.16858	8.90581e-06	-0.229253
chr14_21460885_-	ENSG00000129472.15	RAB2B	0.00475323	12.7831	6.09432e-06	0.233314	hsa-miR-10399-5p	ENSG00000117697.15	NSL1	trans	0.000606268	-3.45042	4.40668e-08	-0.280542
chr14_21460885_-	ENSG00000129472.15	RAB2B	0.00475323	12.7831	6.09432e-06	0.233314	hsa-miR-10399-5p	ENSG00000117868.17	ESYT2	trans	0.0228019	-2.3861	1.99617e-05	-0.220356
chr14_21460885_-	ENSG00000129472.15	RAB2B	0.00475323	12.7831	6.09432e-06	0.233314	hsa-miR-10399-5p	ENSG00000118058.23	KMT2A	trans	0.0226511	-4.11862	1.9308e-05	-0.22073
chr14_21460885_-	ENSG00000129472.15	RAB2B	0.00475323	12.7831	6.09432e-06	0.233314	hsa-miR-10399-5p	ENSG00000118482.12	PHF3	trans	0.00690279	-4.00802	2.08918e-06	-0.2444
chr14_21460885_-	ENSG00000129472.15	RAB2B	0.00475323	12.7831	6.09432e-06	0.233314	hsa-miR-10399-5p	ENSG00000118620.13	ZNF430	trans	0.00271107	-2.44059	2.94529e-07	-0.26342
chr14_21460885_-	ENSG00000129472.15	RAB2B	0.00475323	12.7831	6.09432e-06	0.233314	hsa-miR-10399-5p	ENSG00000118922.17	KLF12	trans	0.00264802	-2.04933	6.83183e-07	-0.255437
chr14_21460885_-	ENSG00000129472.15	RAB2B	0.00475323	12.7831	6.09432e-06	0.233314	hsa-miR-10399-5p	ENSG00000118971.9	CCND2	trans	0.0252518	-3.29148	3.43289e-05	-0.214169
chr14_21460885_-	ENSG00000129472.15	RAB2B	0.00475323	12.7831	6.09432e-06	0.233314	hsa-miR-10399-5p	ENSG00000119004.16	CYP20A1	trans	0.0224244	-1.13473	2.73085e-05	-0.216802
chr14_21460885_-	ENSG00000129472.15	RAB2B	0.00475323	12.7831	6.09432e-06	0.233314	hsa-miR-10399-5p	ENSG00000119041.11	GTF3C3	trans	0.00084563	-2.24748	4.74881e-08	-0.27989
chr14_21460885_-	ENSG00000129472.15	RAB2B	0.00475323	12.7831	6.09432e-06	0.233314	hsa-miR-10399-5p	ENSG00000119396.11	RAB14	trans	0.00336873	-2.53839	5.89014e-07	-0.256864
chr14_21460885_-	ENSG00000129472.15	RAB2B	0.00475323	12.7831	6.09432e-06	0.233314	hsa-miR-10399-5p	ENSG00000119414.12	PPP6C	trans	0.0263642	-1.35141	2.93985e-05	-0.215957
chr14_21460885_-	ENSG00000129472.15	RAB2B	0.00475323	12.7831	6.09432e-06	0.233314	hsa-miR-10399-5p	ENSG00000119596.18	YLPM1	trans	0.0222892	-3.45559	4.3901e-05	-0.211303
chr14_21460885_-	ENSG00000129472.15	RAB2B	0.00475323	12.7831	6.09432e-06	0.233314	hsa-miR-10399-5p	ENSG00000119616.11	FCF1	trans	0.0115518	-2.10733	8.46944e-06	-0.229795
chr14_21460885_-	ENSG00000129472.15	RAB2B	0.00475323	12.7831	6.09432e-06	0.233314	hsa-miR-10399-5p	ENSG00000119689.15	DLST	trans	0.020755	-2.8941	1.46475e-05	-0.22381
chr14_21460885_-	ENSG00000129472.15	RAB2B	0.00475323	12.7831	6.09432e-06	0.233314	hsa-miR-10399-5p	ENSG00000119705.10	SLIRP	trans	0.00182582	-3.23761	1.1849e-07	-0.271775
chr14_21460885_-	ENSG00000129472.15	RAB2B	0.00475323	12.7831	6.09432e-06	0.233314	hsa-miR-10399-5p	ENSG00000119707.14	RBM25	trans	0.0189365	-6.3423	1.56897e-05	-0.223048
chr14_21460885_-	ENSG00000129472.15	RAB2B	0.00475323	12.7831	6.09432e-06	0.233314	hsa-miR-10399-5p	ENSG00000119778.15	ATAD2B	trans	0.0173647	-2.77689	8.96413e-06	-0.229182
chr14_21460885_-	ENSG00000129472.15	RAB2B	0.00475323	12.7831	6.09432e-06	0.233314	hsa-miR-10399-5p	ENSG00000119787.14	ATL2	trans	0.000911572	-2.87162	6.59091e-08	-0.277011
chr14_21460885_-	ENSG00000129472.15	RAB2B	0.00475323	12.7831	6.09432e-06	0.233314	hsa-miR-10399-5p	ENSG00000119866.22	BCL11A	trans	0.0109348	-3.42902	9.17888e-06	-0.228926
chr14_21460885_-	ENSG00000129472.15	RAB2B	0.00475323	12.7831	6.09432e-06	0.233314	hsa-miR-10399-5p	ENSG00000119906.13	SLF2	trans	0.0355138	-2.09793	6.86382e-06	-0.232049
chr14_21460885_-	ENSG00000129472.15	RAB2B	0.00475323	12.7831	6.09432e-06	0.233314	hsa-miR-10399-5p	ENSG00000120253.14	NUP43	trans	0.00283927	-2.33979	5.08028e-07	-0.258278
chr14_21460885_-	ENSG00000129472.15	RAB2B	0.00475323	12.7831	6.09432e-06	0.233314	hsa-miR-10399-5p	ENSG00000120616.16	EPC1	trans	0.00239378	-4.06589	4.1701e-07	-0.260153
chr14_21460885_-	ENSG00000129472.15	RAB2B	0.00475323	12.7831	6.09432e-06	0.233314	hsa-miR-10399-5p	ENSG00000120686.12	UFM1	trans	0.005549	-3.00056	1.5032e-06	-0.247705
chr14_21460885_-	ENSG00000129472.15	RAB2B	0.00475323	12.7831	6.09432e-06	0.233314	hsa-miR-10399-5p	ENSG00000120727.13	PAIP2	trans	0.0125862	-6.06145	5.44891e-06	-0.234499
chr14_21460885_-	ENSG00000129472.15	RAB2B	0.00475323	12.7831	6.09432e-06	0.233314	hsa-miR-10399-5p	ENSG00000120742.11	SERP1	trans	0.00943019	-6.87087	3.23467e-06	-0.239938
chr14_21460885_-	ENSG00000129472.15	RAB2B	0.00475323	12.7831	6.09432e-06	0.233314	hsa-miR-10399-5p	ENSG00000120802.14	TMPO	trans	0.00906297	-7.60874	6.33078e-06	-0.23291
chr14_21460885_-	ENSG00000129472.15	RAB2B	0.00475323	12.7831	6.09432e-06	0.233314	hsa-miR-10399-5p	ENSG00000120948.18	TARDBP	trans	0.000380159	-6.48717	1.79368e-08	-0.288253
chr14_21460885_-	ENSG00000129472.15	RAB2B	0.00475323	12.7831	6.09432e-06	0.233314	hsa-miR-10399-5p	ENSG00000120963.12	ZNF706	trans	0.00164495	-3.5606	1.96383e-07	-0.267174
chr14_21460885_-	ENSG00000129472.15	RAB2B	0.00475323	12.7831	6.09432e-06	0.233314	hsa-miR-10399-5p	ENSG00000120992.18	LYPLA1	trans	0.0149395	-3.28154	7.03418e-06	-0.231787
chr14_21460885_-	ENSG00000129472.15	RAB2B	0.00475323	12.7831	6.09432e-06	0.233314	hsa-miR-10399-5p	ENSG00000121022.14	COPS5	trans	0.000282422	-2.83765	7.58539e-09	-0.295426
chr14_21460885_-	ENSG00000129472.15	RAB2B	0.00475323	12.7831	6.09432e-06	0.233314	hsa-miR-10399-5p	ENSG00000121741.16	ZMYM2	trans	0.00685615	-3.97413	1.66784e-06	-0.246666
chr14_21460885_-	ENSG00000129472.15	RAB2B	0.00475323	12.7831	6.09432e-06	0.233314	hsa-miR-10399-5p	ENSG00000121749.15	TBC1D15	trans	0.00685067	-2.49459	1.02202e-06	-0.251519
chr14_21460885_-	ENSG00000129472.15	RAB2B	0.00475323	12.7831	6.09432e-06	0.233314	hsa-miR-10399-5p	ENSG00000121879.6	PIK3CA	trans	0.0033677	-1.99768	6.94366e-07	-0.25528
chr14_21460885_-	ENSG00000129472.15	RAB2B	0.00475323	12.7831	6.09432e-06	0.233314	hsa-miR-10399-5p	ENSG00000122008.15	POLK	trans	0.000606589	-2.17929	2.58592e-08	-0.285143
chr14_21460885_-	ENSG00000129472.15	RAB2B	0.00475323	12.7831	6.09432e-06	0.233314	hsa-miR-10399-5p	ENSG00000122068.13	FYTTD1	trans	0.0134065	-1.97395	8.38602e-06	-0.229901
chr14_21460885_-	ENSG00000129472.15	RAB2B	0.00475323	12.7831	6.09432e-06	0.233314	hsa-miR-10399-5p	ENSG00000122085.17	MTERF4	trans	0.00227956	-4.79833	5.84012e-07	-0.256945
chr14_21460885_-	ENSG00000129472.15	RAB2B	0.00475323	12.7831	6.09432e-06	0.233314	hsa-miR-10399-5p	ENSG00000122257.20	RBBP6	trans	0.00275098	-4.53024	3.1975e-07	-0.262652
chr14_21460885_-	ENSG00000129472.15	RAB2B	0.00475323	12.7831	6.09432e-06	0.233314	hsa-miR-10399-5p	ENSG00000122299.12	ZC3H7A	trans	0.0358283	-2.14722	6.83356e-05	-0.206046
chr14_21460885_-	ENSG00000129472.15	RAB2B	0.00475323	12.7831	6.09432e-06	0.233314	hsa-miR-10399-5p	ENSG00000122406.14	RPL5	trans	1.63146e-05	-61.2613	4.02459e-10	-0.318519
chr14_21460885_-	ENSG00000129472.15	RAB2B	0.00475323	12.7831	6.09432e-06	0.233314	hsa-miR-10399-5p	ENSG00000122417.15	ODF2L	trans	0.00436212	-3.50443	1.30588e-06	-0.249103
chr14_21460885_-	ENSG00000129472.15	RAB2B	0.00475323	12.7831	6.09432e-06	0.233314	hsa-miR-10399-5p	ENSG00000122545.20	SEPTIN7	trans	0.0156322	-11.0642	8.47674e-06	-0.229785
chr14_21460885_-	ENSG00000129472.15	RAB2B	0.00475323	12.7831	6.09432e-06	0.233314	hsa-miR-10399-5p	ENSG00000122550.18	KLHL7	trans	0.0292078	-1.18775	2.4631e-05	-0.217978
chr14_21460885_-	ENSG00000129472.15	RAB2B	0.00475323	12.7831	6.09432e-06	0.233314	hsa-miR-10399-5p	ENSG00000122557.11	HERPUD2	trans	0.0329537	-2.14291	3.66118e-05	-0.213423
chr14_21460885_-	ENSG00000129472.15	RAB2B	0.00475323	12.7831	6.09432e-06	0.233314	hsa-miR-10399-5p	ENSG00000122566.22	HNRNPA2B1	trans	0.0090251	-14.2993	3.56693e-06	-0.238928
chr14_21460885_-	ENSG00000129472.15	RAB2B	0.00475323	12.7831	6.09432e-06	0.233314	hsa-miR-10399-5p	ENSG00000122674.12	CCZ1	trans	0.0190333	-1.74052	1.38913e-05	-0.224397
chr14_21460885_-	ENSG00000129472.15	RAB2B	0.00475323	12.7831	6.09432e-06	0.233314	hsa-miR-10399-5p	ENSG00000123353.10	ORMDL2	trans	0.00202496	-2.71461	2.59877e-07	-0.264586
chr14_21460885_-	ENSG00000129472.15	RAB2B	0.00475323	12.7831	6.09432e-06	0.233314	hsa-miR-10399-5p	ENSG00000123595.8	RAB9A	trans	0.0394894	-1.20358	4.50627e-05	-0.210996
chr14_21460885_-	ENSG00000129472.15	RAB2B	0.00475323	12.7831	6.09432e-06	0.233314	hsa-miR-10399-5p	ENSG00000124177.15	CHD6	trans	0.0436819	-3.2217	8.29619e-05	-0.203699
chr14_21460885_-	ENSG00000129472.15	RAB2B	0.00475323	12.7831	6.09432e-06	0.233314	hsa-miR-10399-5p	ENSG00000124782.20	RREB1	trans	0.0430965	-1.71141	7.95221e-05	-0.204214
chr14_21460885_-	ENSG00000129472.15	RAB2B	0.00475323	12.7831	6.09432e-06	0.233314	hsa-miR-10399-5p	ENSG00000124795.17	DEK	trans	0.00196264	-6.40964	2.17254e-07	-0.266244
chr14_21460885_-	ENSG00000129472.15	RAB2B	0.00475323	12.7831	6.09432e-06	0.233314	hsa-miR-10399-5p	ENSG00000125676.20	THOC2	trans	0.00508206	-3.80302	9.99061e-07	-0.251742
chr14_21460885_-	ENSG00000129472.15	RAB2B	0.00475323	12.7831	6.09432e-06	0.233314	hsa-miR-10399-5p	ENSG00000125691.14	RPL23	trans	0.000449786	-68.8599	1.97567e-08	-0.287435
chr14_21460885_-	ENSG00000129472.15	RAB2B	0.00475323	12.7831	6.09432e-06	0.233314	hsa-miR-10399-5p	ENSG00000125944.21	HNRNPR	trans	0.0401033	-4.29744	8.4887e-05	-0.20342
chr14_21460885_-	ENSG00000129472.15	RAB2B	0.00475323	12.7831	6.09432e-06	0.233314	hsa-miR-10399-5p	ENSG00000126001.16	CEP250	trans	0.0283676	-2.3182	4.34538e-05	-0.211423
chr14_21460885_-	ENSG00000129472.15	RAB2B	0.00475323	12.7831	6.09432e-06	0.233314	hsa-miR-10399-5p	ENSG00000126070.20	AGO3	trans	0.023014	-1.88755	3.42535e-05	-0.214195
chr14_21460885_-	ENSG00000129472.15	RAB2B	0.00475323	12.7831	6.09432e-06	0.233314	hsa-miR-10399-5p	ENSG00000126261.13	UBA2	trans	0.000545833	-3.17085	6.50026e-08	-0.277133
chr14_21460885_-	ENSG00000129472.15	RAB2B	0.00475323	12.7831	6.09432e-06	0.233314	hsa-miR-10399-5p	ENSG00000126749.16	EMG1	trans	1.48195e-05	-2.66762	5.26162e-10	-0.316492
chr14_21460885_-	ENSG00000129472.15	RAB2B	0.00475323	12.7831	6.09432e-06	0.233314	hsa-miR-10399-5p	ENSG00000126773.13	PCNX4	trans	0.0117312	-2.48215	5.22435e-06	-0.234943
chr14_21460885_-	ENSG00000129472.15	RAB2B	0.00475323	12.7831	6.09432e-06	0.233314	hsa-miR-10399-5p	ENSG00000126858.18	RHOT1	trans	0.0465457	-2.15073	8.85442e-05	-0.202906
chr14_21460885_-	ENSG00000129472.15	RAB2B	0.00475323	12.7831	6.09432e-06	0.233314	hsa-miR-10399-5p	ENSG00000127314.18	RAP1B	trans	0.0366372	-14.3712	3.33595e-05	-0.214501
chr14_21460885_-	ENSG00000129472.15	RAB2B	0.00475323	12.7831	6.09432e-06	0.233314	hsa-miR-10399-5p	ENSG00000127334.11	DYRK2	trans	0.00442816	-3.83667	2.08181e-06	-0.244436
chr14_21460885_-	ENSG00000129472.15	RAB2B	0.00475323	12.7831	6.09432e-06	0.233314	hsa-miR-10399-5p	ENSG00000127483.19	HP1BP3	trans	0.0209184	-11.762	1.95515e-05	-0.220589
chr14_21460885_-	ENSG00000129472.15	RAB2B	0.00475323	12.7831	6.09432e-06	0.233314	hsa-miR-10399-5p	ENSG00000127922.9	SEM1	trans	0.00277992	-3.99285	3.78703e-07	-0.261063
chr14_21460885_-	ENSG00000129472.15	RAB2B	0.00475323	12.7831	6.09432e-06	0.233314	hsa-miR-10399-5p	ENSG00000128000.17	ZNF780B	trans	0.00492206	-3.5986	2.52436e-06	-0.242479
chr14_21460885_-	ENSG00000129472.15	RAB2B	0.00475323	12.7831	6.09432e-06	0.233314	hsa-miR-10399-5p	ENSG00000128534.8	LSM8	trans	0.000329862	-2.874	2.14078e-08	-0.286754
chr14_21460885_-	ENSG00000129472.15	RAB2B	0.00475323	12.7831	6.09432e-06	0.233314	hsa-miR-10399-5p	ENSG00000128609.16	NDUFA5	trans	0.0134185	-2.10805	5.45189e-06	-0.234493
chr14_21460885_-	ENSG00000129472.15	RAB2B	0.00475323	12.7831	6.09432e-06	0.233314	hsa-miR-10399-5p	ENSG00000128891.16	CCDC32	trans	0.0199399	-2.54657	7.48665e-06	-0.23112
chr14_21460885_-	ENSG00000129472.15	RAB2B	0.00475323	12.7831	6.09432e-06	0.233314	hsa-miR-10399-5p	ENSG00000128915.12	ICE2	trans	0.000569324	-2.23498	1.00488e-08	-0.293104
chr14_21460885_-	ENSG00000129472.15	RAB2B	0.00475323	12.7831	6.09432e-06	0.233314	hsa-miR-10399-5p	ENSG00000128951.14	DUT	trans	0.000236321	-4.79478	1.41136e-08	-0.290271
chr14_21460885_-	ENSG00000129472.15	RAB2B	0.00475323	12.7831	6.09432e-06	0.233314	hsa-miR-10399-5p	ENSG00000128989.11	ARPP19	trans	0.00377757	-5.23411	8.04798e-07	-0.253851
chr14_21460885_-	ENSG00000129472.15	RAB2B	0.00475323	12.7831	6.09432e-06	0.233314	hsa-miR-10399-5p	ENSG00000129003.19	VPS13C	trans	0.0255823	-6.60646	4.63044e-05	-0.210677
chr14_21460885_-	ENSG00000129472.15	RAB2B	0.00475323	12.7831	6.09432e-06	0.233314	hsa-miR-10399-5p	ENSG00000129071.10	MBD4	trans	0.00317718	-3.78757	3.32519e-07	-0.262285
chr14_21460885_-	ENSG00000129472.15	RAB2B	0.00475323	12.7831	6.09432e-06	0.233314	hsa-miR-10399-5p	ENSG00000129187.14	DCTD	trans	0.0377964	-1.59312	9.17852e-06	-0.228926
chr14_21460885_-	ENSG00000129472.15	RAB2B	0.00475323	12.7831	6.09432e-06	0.233314	hsa-miR-10399-5p	ENSG00000129197.14	RPAIN	trans	0.00060426	-3.62823	3.11762e-08	-0.283539
chr14_21460885_-	ENSG00000129472.15	RAB2B	0.00475323	12.7831	6.09432e-06	0.233314	hsa-miR-10399-5p	ENSG00000129235.11	TXNDC17	trans	0.00166243	-3.63097	2.13593e-07	-0.266401
chr14_21460885_-	ENSG00000129472.15	RAB2B	0.00475323	12.7831	6.09432e-06	0.233314	hsa-miR-10399-5p	ENSG00000129347.21	KRI1	trans	0.0363294	-1.66579	5.82056e-05	-0.207967
chr14_21460885_-	ENSG00000129472.15	RAB2B	0.00475323	12.7831	6.09432e-06	0.233314	hsa-miR-10399-5p	ENSG00000129460.16	NGDN	trans	0.0195127	-2.03593	1.04324e-05	-0.227537
chr14_21460885_-	ENSG00000129472.15	RAB2B	0.00475323	12.7831	6.09432e-06	0.233314	hsa-miR-10399-5p	ENSG00000129493.15	HEATR5A	trans	0.0436781	-2.48111	9.38988e-05	-0.202187
chr14_21460885_-	ENSG00000129472.15	RAB2B	0.00475323	12.7831	6.09432e-06	0.233314	hsa-miR-10399-5p	ENSG00000129625.13	REEP5	trans	0.0204149	-3.01073	9.26039e-06	-0.22883
chr14_21460885_-	ENSG00000129472.15	RAB2B	0.00475323	12.7831	6.09432e-06	0.233314	hsa-miR-10399-5p	ENSG00000129636.13	ITFG1	trans	0.011423	-1.79381	4.40178e-06	-0.23674
chr14_21460885_-	ENSG00000129472.15	RAB2B	0.00475323	12.7831	6.09432e-06	0.233314	hsa-miR-10399-5p	ENSG00000130338.13	TULP4	trans	0.00207125	-2.47212	2.59235e-07	-0.264609
chr14_21460885_-	ENSG00000129472.15	RAB2B	0.00475323	12.7831	6.09432e-06	0.233314	hsa-miR-10399-5p	ENSG00000130921.8	C12orf65	trans	0.00089645	-2.40132	4.4251e-08	-0.280506
chr14_21460885_-	ENSG00000129472.15	RAB2B	0.00475323	12.7831	6.09432e-06	0.233314	hsa-miR-10399-5p	ENSG00000131368.8	MRPS25	trans	0.000530066	-3.49074	3.90479e-08	-0.281593
chr14_21460885_-	ENSG00000129472.15	RAB2B	0.00475323	12.7831	6.09432e-06	0.233314	hsa-miR-10399-5p	ENSG00000131507.11	NDFIP1	trans	0.00176103	-3.94555	3.90352e-07	-0.260777
chr14_21460885_-	ENSG00000129472.15	RAB2B	0.00475323	12.7831	6.09432e-06	0.233314	hsa-miR-10399-5p	ENSG00000131876.17	SNRPA1	trans	0.0498316	-1.92146	0.000107494	-0.200523
chr14_21460885_-	ENSG00000129472.15	RAB2B	0.00475323	12.7831	6.09432e-06	0.233314	hsa-miR-10399-5p	ENSG00000132199.20	ENOSF1	trans	0.0443551	-2.10625	1.80391e-05	-0.221492
chr14_21460885_-	ENSG00000129472.15	RAB2B	0.00475323	12.7831	6.09432e-06	0.233314	hsa-miR-10399-5p	ENSG00000132388.12	UBE2G1	trans	0.0459937	-2.21994	6.91147e-05	-0.205909
chr14_21460885_-	ENSG00000129472.15	RAB2B	0.00475323	12.7831	6.09432e-06	0.233314	hsa-miR-10399-5p	ENSG00000132424.16	PNISR	trans	0.00857095	-12.0617	3.95958e-06	-0.237844
chr14_21460885_-	ENSG00000129472.15	RAB2B	0.00475323	12.7831	6.09432e-06	0.233314	hsa-miR-10399-5p	ENSG00000132463.14	GRSF1	trans	0.0250885	-1.72768	2.72763e-05	-0.216815
chr14_21460885_-	ENSG00000129472.15	RAB2B	0.00475323	12.7831	6.09432e-06	0.233314	hsa-miR-10399-5p	ENSG00000132581.10	SDF2	trans	0.0249662	-3.28927	2.27921e-05	-0.218859
chr14_21460885_-	ENSG00000129472.15	RAB2B	0.00475323	12.7831	6.09432e-06	0.233314	hsa-miR-10399-5p	ENSG00000132603.15	NIP7	trans	0.0477923	-1.12088	5.74668e-05	-0.20812
chr14_21460885_-	ENSG00000129472.15	RAB2B	0.00475323	12.7831	6.09432e-06	0.233314	hsa-miR-10399-5p	ENSG00000132676.16	DAP3	trans	0.00592028	-4.03822	1.64728e-06	-0.24679
chr14_21460885_-	ENSG00000129472.15	RAB2B	0.00475323	12.7831	6.09432e-06	0.233314	hsa-miR-10399-5p	ENSG00000132680.11	KHDC4	trans	0.0418381	-2.4272	0.000100156	-0.201395
chr14_21460885_-	ENSG00000129472.15	RAB2B	0.00475323	12.7831	6.09432e-06	0.233314	hsa-miR-10399-5p	ENSG00000132849.21	PATJ	trans	0.000889807	-2.80608	1.74692e-07	-0.268248
chr14_21460885_-	ENSG00000129472.15	RAB2B	0.00475323	12.7831	6.09432e-06	0.233314	hsa-miR-10399-5p	ENSG00000133028.12	SCO1	trans	0.00802315	-1.56555	1.18611e-06	-0.250054
chr14_21460885_-	ENSG00000129472.15	RAB2B	0.00475323	12.7831	6.09432e-06	0.233314	hsa-miR-10399-5p	ENSG00000133112.17	TPT1	trans	0.00414714	-85.3316	9.3298e-07	-0.252412
chr14_21460885_-	ENSG00000129472.15	RAB2B	0.00475323	12.7831	6.09432e-06	0.233314	hsa-miR-10399-5p	ENSG00000133639.6	BTG1	trans	0.00301208	-22.2604	6.52784e-07	-0.255876
chr14_21460885_-	ENSG00000129472.15	RAB2B	0.00475323	12.7831	6.09432e-06	0.233314	hsa-miR-10399-5p	ENSG00000133703.13	KRAS	trans	0.0313038	-1.75554	2.91554e-05	-0.216052
chr14_21460885_-	ENSG00000129472.15	RAB2B	0.00475323	12.7831	6.09432e-06	0.233314	hsa-miR-10399-5p	ENSG00000133731.10	IMPA1	trans	0.0107219	-1.64231	4.28429e-06	-0.237023
chr14_21460885_-	ENSG00000129472.15	RAB2B	0.00475323	12.7831	6.09432e-06	0.233314	hsa-miR-10399-5p	ENSG00000133789.15	SWAP70	trans	0.0192929	-1.67546	2.44305e-05	-0.218071
chr14_21460885_-	ENSG00000129472.15	RAB2B	0.00475323	12.7831	6.09432e-06	0.233314	hsa-miR-10399-5p	ENSG00000133858.17	ZFC3H1	trans	0.00383286	-5.78824	1.02037e-06	-0.251535
chr14_21460885_-	ENSG00000129472.15	RAB2B	0.00475323	12.7831	6.09432e-06	0.233314	hsa-miR-10399-5p	ENSG00000133997.12	MED6	trans	0.0367709	-2.79138	9.47609e-05	-0.202075
chr14_21460885_-	ENSG00000129472.15	RAB2B	0.00475323	12.7831	6.09432e-06	0.233314	hsa-miR-10399-5p	ENSG00000134046.12	MBD2	trans	0.0361555	-2.41019	4.66931e-05	-0.210578
chr14_21460885_-	ENSG00000129472.15	RAB2B	0.00475323	12.7831	6.09432e-06	0.233314	hsa-miR-10399-5p	ENSG00000134077.16	THUMPD3	trans	0.00518244	-1.92947	6.34745e-07	-0.256145
chr14_21460885_-	ENSG00000129472.15	RAB2B	0.00475323	12.7831	6.09432e-06	0.233314	hsa-miR-10399-5p	ENSG00000134265.13	NAPG	trans	0.0107482	-1.51143	6.85826e-06	-0.232058
chr14_21460885_-	ENSG00000129472.15	RAB2B	0.00475323	12.7831	6.09432e-06	0.233314	hsa-miR-10399-5p	ENSG00000134294.14	SLC38A2	trans	0.018263	-6.34682	1.62096e-05	-0.222686
chr14_21460885_-	ENSG00000129472.15	RAB2B	0.00475323	12.7831	6.09432e-06	0.233314	hsa-miR-10399-5p	ENSG00000134324.12	LPIN1	trans	0.0418704	-1.91661	7.26475e-05	-0.205308
chr14_21460885_-	ENSG00000129472.15	RAB2B	0.00475323	12.7831	6.09432e-06	0.233314	hsa-miR-10399-5p	ENSG00000134352.20	IL6ST	trans	0.0149218	-4.1917	5.26556e-05	-0.209158
chr14_21460885_-	ENSG00000129472.15	RAB2B	0.00475323	12.7831	6.09432e-06	0.233314	hsa-miR-10399-5p	ENSG00000134371.14	CDC73	trans	0.027418	-2.63846	3.96373e-05	-0.212498
chr14_21460885_-	ENSG00000129472.15	RAB2B	0.00475323	12.7831	6.09432e-06	0.233314	hsa-miR-10399-5p	ENSG00000134419.15	RPS15A	trans	0.0131695	-153.121	1.64031e-05	-0.222553
chr14_21460885_-	ENSG00000129472.15	RAB2B	0.00475323	12.7831	6.09432e-06	0.233314	hsa-miR-10399-5p	ENSG00000134444.15	RELCH	trans	0.0138202	-4.30283	7.58343e-06	-0.230983
chr14_21460885_-	ENSG00000129472.15	RAB2B	0.00475323	12.7831	6.09432e-06	0.233314	hsa-miR-10399-5p	ENSG00000134480.16	CCNH	trans	0.00559595	-10.705	1.47044e-06	-0.247924
chr14_21460885_-	ENSG00000129472.15	RAB2B	0.00475323	12.7831	6.09432e-06	0.233314	hsa-miR-10399-5p	ENSG00000134744.14	TUT4	trans	0.000215698	-6.50074	9.06263e-09	-0.293959
chr14_21460885_-	ENSG00000129472.15	RAB2B	0.00475323	12.7831	6.09432e-06	0.233314	hsa-miR-10399-5p	ENSG00000134748.13	PRPF38A	trans	0.000401529	-1.95733	1.59151e-08	-0.289262
chr14_21460885_-	ENSG00000129472.15	RAB2B	0.00475323	12.7831	6.09432e-06	0.233314	hsa-miR-10399-5p	ENSG00000134759.14	ELP2	trans	0.00334107	-4.27307	1.22413e-06	-0.249743
chr14_21460885_-	ENSG00000129472.15	RAB2B	0.00475323	12.7831	6.09432e-06	0.233314	hsa-miR-10399-5p	ENSG00000134884.15	ARGLU1	trans	0.00392559	-9.02408	1.25101e-06	-0.249528
chr14_21460885_-	ENSG00000129472.15	RAB2B	0.00475323	12.7831	6.09432e-06	0.233314	hsa-miR-10399-5p	ENSG00000134899.23	ERCC5	trans	0.0177335	-3.94693	1.18376e-05	-0.226156
chr14_21460885_-	ENSG00000129472.15	RAB2B	0.00475323	12.7831	6.09432e-06	0.233314	hsa-miR-10399-5p	ENSG00000134954.14	ETS1	trans	0.020284	-12.8143	4.27677e-05	-0.211609
chr14_21460885_-	ENSG00000129472.15	RAB2B	0.00475323	12.7831	6.09432e-06	0.233314	hsa-miR-10399-5p	ENSG00000134970.14	TMED7	trans	0.0351836	-2.4816	4.20905e-05	-0.211796
chr14_21460885_-	ENSG00000129472.15	RAB2B	0.00475323	12.7831	6.09432e-06	0.233314	hsa-miR-10399-5p	ENSG00000135108.15	FBXO21	trans	0.0185423	-1.84912	2.51853e-05	-0.217725
chr14_21460885_-	ENSG00000129472.15	RAB2B	0.00475323	12.7831	6.09432e-06	0.233314	hsa-miR-10399-5p	ENSG00000135241.17	PNPLA8	trans	0.00421756	-2.08225	9.18087e-07	-0.252569
chr14_21460885_-	ENSG00000129472.15	RAB2B	0.00475323	12.7831	6.09432e-06	0.233314	hsa-miR-10399-5p	ENSG00000135297.16	MTO1	trans	0.00278302	-2.51362	6.13137e-07	-0.256478
chr14_21460885_-	ENSG00000129472.15	RAB2B	0.00475323	12.7831	6.09432e-06	0.233314	hsa-miR-10399-5p	ENSG00000135426.16	TESPA1	trans	0.00179313	-2.51043	3.45878e-07	-0.261916
chr14_21460885_-	ENSG00000129472.15	RAB2B	0.00475323	12.7831	6.09432e-06	0.233314	hsa-miR-10399-5p	ENSG00000135597.19	REPS1	trans	0.0342593	-1.94269	6.29314e-05	-0.207035
chr14_21460885_-	ENSG00000129472.15	RAB2B	0.00475323	12.7831	6.09432e-06	0.233314	hsa-miR-10399-5p	ENSG00000135637.14	CCDC142	trans	0.0482537	-2.26435	8.362e-05	-0.203603
chr14_21460885_-	ENSG00000129472.15	RAB2B	0.00475323	12.7831	6.09432e-06	0.233314	hsa-miR-10399-5p	ENSG00000135679.25	MDM2	trans	0.00405311	-6.91613	5.1072e-07	-0.258228
chr14_21460885_-	ENSG00000129472.15	RAB2B	0.00475323	12.7831	6.09432e-06	0.233314	hsa-miR-10399-5p	ENSG00000135686.13	KLHL36	trans	0.018588	-2.90901	1.89943e-05	-0.220914
chr14_21460885_-	ENSG00000129472.15	RAB2B	0.00475323	12.7831	6.09432e-06	0.233314	hsa-miR-10399-5p	ENSG00000135698.10	MPHOSPH6	trans	0.0411602	-1.80997	1.67772e-05	-0.222302
chr14_21460885_-	ENSG00000129472.15	RAB2B	0.00475323	12.7831	6.09432e-06	0.233314	hsa-miR-10399-5p	ENSG00000135829.17	DHX9	trans	0.00655845	-4.57817	2.27953e-06	-0.243517
chr14_21460885_-	ENSG00000129472.15	RAB2B	0.00475323	12.7831	6.09432e-06	0.233314	hsa-miR-10399-5p	ENSG00000135945.10	REV1	trans	0.00116896	-3.7097	9.38486e-08	-0.273869
chr14_21460885_-	ENSG00000129472.15	RAB2B	0.00475323	12.7831	6.09432e-06	0.233314	hsa-miR-10399-5p	ENSG00000135968.21	GCC2	trans	0.000207727	-4.79934	4.92347e-09	-0.298954
chr14_21460885_-	ENSG00000129472.15	RAB2B	0.00475323	12.7831	6.09432e-06	0.233314	hsa-miR-10399-5p	ENSG00000136051.15	WASHC4	trans	0.0165467	-8.22055	9.68972e-06	-0.228339
chr14_21460885_-	ENSG00000129472.15	RAB2B	0.00475323	12.7831	6.09432e-06	0.233314	hsa-miR-10399-5p	ENSG00000136100.14	VPS36	trans	0.000168522	-3.08244	4.94522e-09	-0.298918
chr14_21460885_-	ENSG00000129472.15	RAB2B	0.00475323	12.7831	6.09432e-06	0.233314	hsa-miR-10399-5p	ENSG00000136104.21	RNASEH2B	trans	0.0392409	-3.69428	7.18272e-05	-0.205446
chr14_21460885_-	ENSG00000129472.15	RAB2B	0.00475323	12.7831	6.09432e-06	0.233314	hsa-miR-10399-5p	ENSG00000136143.16	SUCLA2	trans	0.000413418	-1.88021	5.18983e-09	-0.298527
chr14_21460885_-	ENSG00000129472.15	RAB2B	0.00475323	12.7831	6.09432e-06	0.233314	hsa-miR-10399-5p	ENSG00000136146.15	MED4	trans	0.0266091	-1.84157	2.14819e-05	-0.219529
chr14_21460885_-	ENSG00000129472.15	RAB2B	0.00475323	12.7831	6.09432e-06	0.233314	hsa-miR-10399-5p	ENSG00000136243.17	NUP42	trans	0.00197151	-2.77723	5.85955e-08	-0.278048
chr14_21460885_-	ENSG00000129472.15	RAB2B	0.00475323	12.7831	6.09432e-06	0.233314	hsa-miR-10399-5p	ENSG00000136381.13	IREB2	trans	0.0498575	-2.25755	0.000126919	-0.19846
chr14_21460885_-	ENSG00000129472.15	RAB2B	0.00475323	12.7831	6.09432e-06	0.233314	hsa-miR-10399-5p	ENSG00000136504.13	KAT7	trans	0.0344374	-3.03046	6.0542e-05	-0.207498
chr14_21460885_-	ENSG00000129472.15	RAB2B	0.00475323	12.7831	6.09432e-06	0.233314	hsa-miR-10399-5p	ENSG00000136521.13	NDUFB5	trans	0.00597909	-5.53771	1.87439e-06	-0.245494
chr14_21460885_-	ENSG00000129472.15	RAB2B	0.00475323	12.7831	6.09432e-06	0.233314	hsa-miR-10399-5p	ENSG00000136527.18	TRA2B	trans	0.00158447	-9.54479	2.8065e-07	-0.26387
chr14_21460885_-	ENSG00000129472.15	RAB2B	0.00475323	12.7831	6.09432e-06	0.233314	hsa-miR-10399-5p	ENSG00000136709.12	WDR33	trans	0.0102174	-3.57	6.49747e-06	-0.232633
chr14_21460885_-	ENSG00000129472.15	RAB2B	0.00475323	12.7831	6.09432e-06	0.233314	hsa-miR-10399-5p	ENSG00000136937.13	NCBP1	trans	0.00268259	-1.90554	4.91993e-08	-0.27958
chr14_21460885_-	ENSG00000129472.15	RAB2B	0.00475323	12.7831	6.09432e-06	0.233314	hsa-miR-10399-5p	ENSG00000137106.18	GRHPR	trans	0.0207862	-2.45364	1.53227e-05	-0.223311
chr14_21460885_-	ENSG00000129472.15	RAB2B	0.00475323	12.7831	6.09432e-06	0.233314	hsa-miR-10399-5p	ENSG00000137145.20	DENND4C	trans	0.00575679	-2.39541	1.39078e-06	-0.248478
chr14_21460885_-	ENSG00000129472.15	RAB2B	0.00475323	12.7831	6.09432e-06	0.233314	hsa-miR-10399-5p	ENSG00000137500.9	CCDC90B	trans	0.000186924	-1.96798	3.80097e-09	-0.301044
chr14_21460885_-	ENSG00000129472.15	RAB2B	0.00475323	12.7831	6.09432e-06	0.233314	hsa-miR-10399-5p	ENSG00000137504.14	CREBZF	trans	0.00391584	-3.48007	1.01671e-06	-0.25157
chr14_21460885_-	ENSG00000129472.15	RAB2B	0.00475323	12.7831	6.09432e-06	0.233314	hsa-miR-10399-5p	ENSG00000137770.14	CTDSPL2	trans	0.018543	-3.00931	1.60855e-05	-0.222771
chr14_21460885_-	ENSG00000129472.15	RAB2B	0.00475323	12.7831	6.09432e-06	0.233314	hsa-miR-10399-5p	ENSG00000137871.20	ZNF280D	trans	0.000183048	-2.66561	2.0509e-09	-0.305961
chr14_21460885_-	ENSG00000129472.15	RAB2B	0.00475323	12.7831	6.09432e-06	0.233314	hsa-miR-10399-5p	ENSG00000137996.13	RTCA	trans	0.0361358	-1.47988	2.91518e-05	-0.216053
chr14_21460885_-	ENSG00000129472.15	RAB2B	0.00475323	12.7831	6.09432e-06	0.233314	hsa-miR-10399-5p	ENSG00000138032.21	PPM1B	trans	0.0154537	-4.44799	8.78435e-06	-0.229401
chr14_21460885_-	ENSG00000129472.15	RAB2B	0.00475323	12.7831	6.09432e-06	0.233314	hsa-miR-10399-5p	ENSG00000138134.12	STAMBPL1	trans	0.000370547	-2.92996	1.53613e-08	-0.28956
chr14_21460885_-	ENSG00000129472.15	RAB2B	0.00475323	12.7831	6.09432e-06	0.233314	hsa-miR-10399-5p	ENSG00000138398.17	PPIG	trans	0.000719782	-2.81578	2.39257e-08	-0.285807
chr14_21460885_-	ENSG00000129472.15	RAB2B	0.00475323	12.7831	6.09432e-06	0.233314	hsa-miR-10399-5p	ENSG00000138433.16	CIR1	trans	0.0177567	-5.52198	8.45776e-06	-0.22981
chr14_21460885_-	ENSG00000129472.15	RAB2B	0.00475323	12.7831	6.09432e-06	0.233314	hsa-miR-10399-5p	ENSG00000138592.14	USP8	trans	0.0187941	-4.39397	1.57348e-05	-0.223016
chr14_21460885_-	ENSG00000129472.15	RAB2B	0.00475323	12.7831	6.09432e-06	0.233314	hsa-miR-10399-5p	ENSG00000138698.15	RAP1GDS1	trans	0.00489326	-2.35797	1.38658e-06	-0.248508
chr14_21460885_-	ENSG00000129472.15	RAB2B	0.00475323	12.7831	6.09432e-06	0.233314	hsa-miR-10399-5p	ENSG00000138764.15	CCNG2	trans	0.043798	-3.10684	6.50678e-05	-0.206635
chr14_21460885_-	ENSG00000129472.15	RAB2B	0.00475323	12.7831	6.09432e-06	0.233314	hsa-miR-10399-5p	ENSG00000138768.15	USO1	trans	0.00976706	-2.0654	4.37448e-06	-0.236805
chr14_21460885_-	ENSG00000129472.15	RAB2B	0.00475323	12.7831	6.09432e-06	0.233314	hsa-miR-10399-5p	ENSG00000138777.20	PPA2	trans	3.85334e-05	-3.84659	4.33439e-10	-0.31796
chr14_21460885_-	ENSG00000129472.15	RAB2B	0.00475323	12.7831	6.09432e-06	0.233314	hsa-miR-10399-5p	ENSG00000138814.17	PPP3CA	trans	0.01841	-2.48174	1.21496e-05	-0.225871
chr14_21460885_-	ENSG00000129472.15	RAB2B	0.00475323	12.7831	6.09432e-06	0.233314	hsa-miR-10399-5p	ENSG00000139154.16	AEBP2	trans	0.000267324	-2.18677	1.80173e-08	-0.288216
chr14_21460885_-	ENSG00000129472.15	RAB2B	0.00475323	12.7831	6.09432e-06	0.233314	hsa-miR-10399-5p	ENSG00000139163.16	ETNK1	trans	0.026905	-3.89383	3.81047e-05	-0.212958
chr14_21460885_-	ENSG00000129472.15	RAB2B	0.00475323	12.7831	6.09432e-06	0.233314	hsa-miR-10399-5p	ENSG00000139180.11	NDUFA9	trans	0.00717337	-3.01099	2.20003e-06	-0.243877
chr14_21460885_-	ENSG00000129472.15	RAB2B	0.00475323	12.7831	6.09432e-06	0.233314	hsa-miR-10399-5p	ENSG00000139218.18	SCAF11	trans	0.00788768	-10.9332	3.11673e-06	-0.24032
chr14_21460885_-	ENSG00000129472.15	RAB2B	0.00475323	12.7831	6.09432e-06	0.233314	hsa-miR-10399-5p	ENSG00000139496.16	NUP58	trans	0.0236766	-4.15205	2.24234e-05	-0.219044
chr14_21460885_-	ENSG00000129472.15	RAB2B	0.00475323	12.7831	6.09432e-06	0.233314	hsa-miR-10399-5p	ENSG00000139679.15	LPAR6	trans	0.00101978	-4.74727	7.35457e-08	-0.27604
chr14_21460885_-	ENSG00000129472.15	RAB2B	0.00475323	12.7831	6.09432e-06	0.233314	hsa-miR-10399-5p	ENSG00000139684.15	ESD	trans	0.0115962	-2.27512	4.08288e-06	-0.237525
chr14_21460885_-	ENSG00000129472.15	RAB2B	0.00475323	12.7831	6.09432e-06	0.233314	hsa-miR-10399-5p	ENSG00000139746.16	RBM26	trans	0.00164364	-3.04165	2.64783e-07	-0.264412
chr14_21460885_-	ENSG00000129472.15	RAB2B	0.00475323	12.7831	6.09432e-06	0.233314	hsa-miR-10399-5p	ENSG00000139826.6	ABHD13	trans	0.0337956	-1.39155	6.65022e-05	-0.206373
chr14_21460885_-	ENSG00000129472.15	RAB2B	0.00475323	12.7831	6.09432e-06	0.233314	hsa-miR-10399-5p	ENSG00000139921.13	TMX1	trans	0.0143931	-2.09164	9.93034e-06	-0.228073
chr14_21460885_-	ENSG00000129472.15	RAB2B	0.00475323	12.7831	6.09432e-06	0.233314	hsa-miR-10399-5p	ENSG00000140030.6	GPR65	trans	0.0263674	-1.83323	2.63857e-05	-0.217194
chr14_21460885_-	ENSG00000129472.15	RAB2B	0.00475323	12.7831	6.09432e-06	0.233314	hsa-miR-10399-5p	ENSG00000140391.15	TSPAN3	trans	0.0375422	-1.64245	7.13082e-05	-0.205533
chr14_21460885_-	ENSG00000129472.15	RAB2B	0.00475323	12.7831	6.09432e-06	0.233314	hsa-miR-10399-5p	ENSG00000140650.12	PMM2	trans	0.0378192	-2.6716	6.01042e-05	-0.207584
chr14_21460885_-	ENSG00000129472.15	RAB2B	0.00475323	12.7831	6.09432e-06	0.233314	hsa-miR-10399-5p	ENSG00000140694.17	PARN	trans	0.0345695	-2.01359	1.11032e-05	-0.226857
chr14_21460885_-	ENSG00000129472.15	RAB2B	0.00475323	12.7831	6.09432e-06	0.233314	hsa-miR-10399-5p	ENSG00000140718.21	FTO	trans	0.0264299	-2.25745	2.08092e-05	-0.219888
chr14_21460885_-	ENSG00000129472.15	RAB2B	0.00475323	12.7831	6.09432e-06	0.233314	hsa-miR-10399-5p	ENSG00000140740.11	UQCRC2	trans	0.00537155	-7.85061	1.49192e-06	-0.24778
chr14_21460885_-	ENSG00000129472.15	RAB2B	0.00475323	12.7831	6.09432e-06	0.233314	hsa-miR-10399-5p	ENSG00000140987.20	ZSCAN32	trans	0.027196	-1.35804	2.59894e-05	-0.217367
chr14_21460885_-	ENSG00000129472.15	RAB2B	0.00475323	12.7831	6.09432e-06	0.233314	hsa-miR-10399-5p	ENSG00000141252.20	VPS53	trans	0.0239177	-2.47783	4.1098e-05	-0.212076
chr14_21460885_-	ENSG00000129472.15	RAB2B	0.00475323	12.7831	6.09432e-06	0.233314	hsa-miR-10399-5p	ENSG00000141367.12	CLTC	trans	0.030195	-5.66734	3.27125e-05	-0.214727
chr14_21460885_-	ENSG00000129472.15	RAB2B	0.00475323	12.7831	6.09432e-06	0.233314	hsa-miR-10399-5p	ENSG00000141380.14	SS18	trans	0.0254131	-2.8252	1.4715e-05	-0.22376
chr14_21460885_-	ENSG00000129472.15	RAB2B	0.00475323	12.7831	6.09432e-06	0.233314	hsa-miR-10399-5p	ENSG00000141425.18	RPRD1A	trans	0.0163298	-3.17281	1.46204e-05	-0.223831
chr14_21460885_-	ENSG00000129472.15	RAB2B	0.00475323	12.7831	6.09432e-06	0.233314	hsa-miR-10399-5p	ENSG00000141524.17	TMC6	trans	0.0277465	-15.4653	6.17976e-05	-0.207252
chr14_21460885_-	ENSG00000129472.15	RAB2B	0.00475323	12.7831	6.09432e-06	0.233314	hsa-miR-10399-5p	ENSG00000141562.18	NARF	trans	0.0434624	-4.18313	7.15331e-05	-0.205495
chr14_21460885_-	ENSG00000129472.15	RAB2B	0.00475323	12.7831	6.09432e-06	0.233314	hsa-miR-10399-5p	ENSG00000141627.14	DYM	trans	0.0214983	-2.95925	2.30446e-05	-0.218734
chr14_21460885_-	ENSG00000129472.15	RAB2B	0.00475323	12.7831	6.09432e-06	0.233314	hsa-miR-10399-5p	ENSG00000141646.14	SMAD4	trans	0.0217313	-4.86277	1.83067e-05	-0.221327
chr14_21460885_-	ENSG00000129472.15	RAB2B	0.00475323	12.7831	6.09432e-06	0.233314	hsa-miR-10399-5p	ENSG00000142168.15	SOD1	trans	0.00148245	-6.33554	1.0756e-07	-0.272646
chr14_21460885_-	ENSG00000129472.15	RAB2B	0.00475323	12.7831	6.09432e-06	0.233314	hsa-miR-10399-5p	ENSG00000142188.17	TMEM50B	trans	2.2897e-05	-3.28938	4.69077e-10	-0.317363
chr14_21460885_-	ENSG00000129472.15	RAB2B	0.00475323	12.7831	6.09432e-06	0.233314	hsa-miR-10399-5p	ENSG00000142546.14	NOSIP	trans	0.00214916	-8.36952	9.03658e-07	-0.252723
chr14_21460885_-	ENSG00000129472.15	RAB2B	0.00475323	12.7831	6.09432e-06	0.233314	hsa-miR-10399-5p	ENSG00000143183.18	TMCO1	trans	0.00556077	-3.80815	1.11243e-06	-0.250686
chr14_21460885_-	ENSG00000129472.15	RAB2B	0.00475323	12.7831	6.09432e-06	0.233314	hsa-miR-10399-5p	ENSG00000143420.19	ENSA	trans	0.0165623	-3.65768	7.69213e-06	-0.23083
chr14_21460885_-	ENSG00000129472.15	RAB2B	0.00475323	12.7831	6.09432e-06	0.233314	hsa-miR-10399-5p	ENSG00000143515.19	ATP8B2	trans	0.0194512	-3.05439	2.27466e-05	-0.218882
chr14_21460885_-	ENSG00000129472.15	RAB2B	0.00475323	12.7831	6.09432e-06	0.233314	hsa-miR-10399-5p	ENSG00000143612.21	C1orf43	trans	0.0305951	-2.86518	3.54072e-05	-0.213811
chr14_21460885_-	ENSG00000129472.15	RAB2B	0.00475323	12.7831	6.09432e-06	0.233314	hsa-miR-10399-5p	ENSG00000143633.13	C1orf131	trans	0.0236175	-1.48023	5.265e-06	-0.234861
chr14_21460885_-	ENSG00000129472.15	RAB2B	0.00475323	12.7831	6.09432e-06	0.233314	hsa-miR-10399-5p	ENSG00000143772.9	ITPKB	trans	0.0287732	-4.37753	4.886e-05	-0.210043
chr14_21460885_-	ENSG00000129472.15	RAB2B	0.00475323	12.7831	6.09432e-06	0.233314	hsa-miR-10399-5p	ENSG00000143889.16	HNRNPLL	trans	0.0342018	-2.28823	3.7805e-05	-0.21305
chr14_21460885_-	ENSG00000129472.15	RAB2B	0.00475323	12.7831	6.09432e-06	0.233314	hsa-miR-10399-5p	ENSG00000143924.19	EML4	trans	0.00466007	-4.93696	2.04476e-06	-0.244617
chr14_21460885_-	ENSG00000129472.15	RAB2B	0.00475323	12.7831	6.09432e-06	0.233314	hsa-miR-10399-5p	ENSG00000144218.19	AFF3	trans	0.0131375	-3.56371	1.16383e-05	-0.226342
chr14_21460885_-	ENSG00000129472.15	RAB2B	0.00475323	12.7831	6.09432e-06	0.233314	hsa-miR-10399-5p	ENSG00000144224.17	UBXN4	trans	0.00444795	-4.40578	9.17472e-07	-0.252575
chr14_21460885_-	ENSG00000129472.15	RAB2B	0.00475323	12.7831	6.09432e-06	0.233314	hsa-miR-10399-5p	ENSG00000144357.18	UBR3	trans	0.00297374	-2.84262	3.38964e-07	-0.262105
chr14_21460885_-	ENSG00000129472.15	RAB2B	0.00475323	12.7831	6.09432e-06	0.233314	hsa-miR-10399-5p	ENSG00000144381.18	HSPD1	trans	0.00293004	-2.99511	6.9255e-07	-0.255306
chr14_21460885_-	ENSG00000129472.15	RAB2B	0.00475323	12.7831	6.09432e-06	0.233314	hsa-miR-10399-5p	ENSG00000144401.14	METTL21A	trans	0.00269277	-2.07433	2.04206e-07	-0.266815
chr14_21460885_-	ENSG00000129472.15	RAB2B	0.00475323	12.7831	6.09432e-06	0.233314	hsa-miR-10399-5p	ENSG00000144580.14	CNOT9	trans	0.0300123	-1.81213	4.53227e-05	-0.210929
chr14_21460885_-	ENSG00000129472.15	RAB2B	0.00475323	12.7831	6.09432e-06	0.233314	hsa-miR-10399-5p	ENSG00000144747.17	TMF1	trans	0.0197224	-2.66869	1.34905e-05	-0.22472
chr14_21460885_-	ENSG00000129472.15	RAB2B	0.00475323	12.7831	6.09432e-06	0.233314	hsa-miR-10399-5p	ENSG00000144827.9	ABHD10	trans	0.00120743	-2.01076	1.05043e-07	-0.272859
chr14_21460885_-	ENSG00000129472.15	RAB2B	0.00475323	12.7831	6.09432e-06	0.233314	hsa-miR-10399-5p	ENSG00000144840.10	RABL3	trans	0.00453192	-1.44389	1.55279e-06	-0.247381
chr14_21460885_-	ENSG00000129472.15	RAB2B	0.00475323	12.7831	6.09432e-06	0.233314	hsa-miR-10399-5p	ENSG00000144895.12	EIF2A	trans	0.00021392	-4.95592	8.41442e-09	-0.294572
chr14_21460885_-	ENSG00000129472.15	RAB2B	0.00475323	12.7831	6.09432e-06	0.233314	hsa-miR-10399-5p	ENSG00000145241.11	CENPC	trans	0.000588017	-2.58502	3.20379e-08	-0.283304
chr14_21460885_-	ENSG00000129472.15	RAB2B	0.00475323	12.7831	6.09432e-06	0.233314	hsa-miR-10399-5p	ENSG00000145416.13	MARCHF1	trans	0.0241932	-6.3551	2.43165e-05	-0.218124
chr14_21460885_-	ENSG00000129472.15	RAB2B	0.00475323	12.7831	6.09432e-06	0.233314	hsa-miR-10399-5p	ENSG00000145439.12	CBR4	trans	0.00138336	-2.0458	9.89646e-08	-0.273394
chr14_21460885_-	ENSG00000129472.15	RAB2B	0.00475323	12.7831	6.09432e-06	0.233314	hsa-miR-10399-5p	ENSG00000145592.14	RPL37	trans	0.000494703	-66.3663	6.37553e-08	-0.277304
chr14_21460885_-	ENSG00000129472.15	RAB2B	0.00475323	12.7831	6.09432e-06	0.233314	hsa-miR-10399-5p	ENSG00000145604.17	SKP2	trans	0.00635441	-1.6806	2.08445e-06	-0.244423
chr14_21460885_-	ENSG00000129472.15	RAB2B	0.00475323	12.7831	6.09432e-06	0.233314	hsa-miR-10399-5p	ENSG00000145687.16	SSBP2	trans	0.00402139	-3.01074	1.06378e-06	-0.251126
chr14_21460885_-	ENSG00000129472.15	RAB2B	0.00475323	12.7831	6.09432e-06	0.233314	hsa-miR-10399-5p	ENSG00000145703.16	IQGAP2	trans	0.0269752	-5.71636	2.94354e-05	-0.215942
chr14_21460885_-	ENSG00000129472.15	RAB2B	0.00475323	12.7831	6.09432e-06	0.233314	hsa-miR-10399-5p	ENSG00000145725.20	PPIP5K2	trans	0.00281213	-4.92697	5.66026e-07	-0.257245
chr14_21460885_-	ENSG00000129472.15	RAB2B	0.00475323	12.7831	6.09432e-06	0.233314	hsa-miR-10399-5p	ENSG00000145779.8	TNFAIP8	trans	0.000263171	-10.7791	2.18654e-08	-0.286574
chr14_21460885_-	ENSG00000129472.15	RAB2B	0.00475323	12.7831	6.09432e-06	0.233314	hsa-miR-10399-5p	ENSG00000145782.13	ATG12	trans	0.00515203	-4.39317	1.20188e-06	-0.249924
chr14_21460885_-	ENSG00000129472.15	RAB2B	0.00475323	12.7831	6.09432e-06	0.233314	hsa-miR-10399-5p	ENSG00000145817.17	YIPF5	trans	0.0161553	-1.62306	7.54285e-06	-0.23104
chr14_21460885_-	ENSG00000129472.15	RAB2B	0.00475323	12.7831	6.09432e-06	0.233314	hsa-miR-10399-5p	ENSG00000145907.16	G3BP1	trans	0.0439172	-8.06287	0.000133187	-0.197858
chr14_21460885_-	ENSG00000129472.15	RAB2B	0.00475323	12.7831	6.09432e-06	0.233314	hsa-miR-10399-5p	ENSG00000145982.13	FARS2	trans	0.0236772	-1.302	2.19824e-05	-0.219268
chr14_21460885_-	ENSG00000129472.15	RAB2B	0.00475323	12.7831	6.09432e-06	0.233314	hsa-miR-10399-5p	ENSG00000146223.16	RPL7L1	trans	0.00228142	-3.61611	2.06002e-07	-0.266734
chr14_21460885_-	ENSG00000129472.15	RAB2B	0.00475323	12.7831	6.09432e-06	0.233314	hsa-miR-10399-5p	ENSG00000146278.11	PNRC1	trans	0.00601324	-15.6227	1.94671e-06	-0.245113
chr14_21460885_-	ENSG00000129472.15	RAB2B	0.00475323	12.7831	6.09432e-06	0.233314	hsa-miR-10399-5p	ENSG00000146414.16	SHPRH	trans	0.00127405	-1.70496	1.20814e-07	-0.271599
chr14_21460885_-	ENSG00000129472.15	RAB2B	0.00475323	12.7831	6.09432e-06	0.233314	hsa-miR-10399-5p	ENSG00000146433.9	TMEM181	trans	0.0266968	-1.21998	2.28854e-05	-0.218813
chr14_21460885_-	ENSG00000129472.15	RAB2B	0.00475323	12.7831	6.09432e-06	0.233314	hsa-miR-10399-5p	ENSG00000146676.10	PURB	trans	0.0117063	-1.47957	4.44165e-06	-0.236646
chr14_21460885_-	ENSG00000129472.15	RAB2B	0.00475323	12.7831	6.09432e-06	0.233314	hsa-miR-10399-5p	ENSG00000146802.13	TMEM168	trans	4.26369e-05	-1.91972	4.28903e-10	-0.318039
chr14_21460885_-	ENSG00000129472.15	RAB2B	0.00475323	12.7831	6.09432e-06	0.233314	hsa-miR-10399-5p	ENSG00000146872.18	TLK2	trans	0.0145489	-2.95751	3.82292e-06	-0.238209
chr14_21460885_-	ENSG00000129472.15	RAB2B	0.00475323	12.7831	6.09432e-06	0.233314	hsa-miR-10399-5p	ENSG00000146963.18	LUC7L2	trans	0.0282974	-3.33795	3.59888e-05	-0.213622
chr14_21460885_-	ENSG00000129472.15	RAB2B	0.00475323	12.7831	6.09432e-06	0.233314	hsa-miR-10399-5p	ENSG00000147044.22	CASK	trans	2.68102e-05	-2.85633	7.27975e-10	-0.314016
chr14_21460885_-	ENSG00000129472.15	RAB2B	0.00475323	12.7831	6.09432e-06	0.233314	hsa-miR-10399-5p	ENSG00000147099.21	HDAC8	trans	0.0204189	-2.25322	5.12027e-06	-0.235155
chr14_21460885_-	ENSG00000129472.15	RAB2B	0.00475323	12.7831	6.09432e-06	0.233314	hsa-miR-10399-5p	ENSG00000147535.17	PLPP5	trans	0.037321	-1.61352	9.05617e-05	-0.20263
chr14_21460885_-	ENSG00000129472.15	RAB2B	0.00475323	12.7831	6.09432e-06	0.233314	hsa-miR-10399-5p	ENSG00000147548.17	NSD3	trans	0.0434017	-5.55592	7.60623e-05	-0.204753
chr14_21460885_-	ENSG00000129472.15	RAB2B	0.00475323	12.7831	6.09432e-06	0.233314	hsa-miR-10399-5p	ENSG00000147586.10	MRPS28	trans	0.00305963	-1.82023	6.93905e-07	-0.255287
chr14_21460885_-	ENSG00000129472.15	RAB2B	0.00475323	12.7831	6.09432e-06	0.233314	hsa-miR-10399-5p	ENSG00000147649.10	MTDH	trans	0.00350835	-2.66764	8.50791e-07	-0.253311
chr14_21460885_-	ENSG00000129472.15	RAB2B	0.00475323	12.7831	6.09432e-06	0.233314	hsa-miR-10399-5p	ENSG00000147679.12	UTP23	trans	0.00401291	-1.8493	5.66892e-07	-0.25723
chr14_21460885_-	ENSG00000129472.15	RAB2B	0.00475323	12.7831	6.09432e-06	0.233314	hsa-miR-10399-5p	ENSG00000147789.15	ZNF7	trans	0.0134751	-1.87974	4.27547e-06	-0.237044
chr14_21460885_-	ENSG00000129472.15	RAB2B	0.00475323	12.7831	6.09432e-06	0.233314	hsa-miR-10399-5p	ENSG00000148019.14	CEP78	trans	0.0419978	-1.9115	4.87544e-05	-0.210069
chr14_21460885_-	ENSG00000129472.15	RAB2B	0.00475323	12.7831	6.09432e-06	0.233314	hsa-miR-10399-5p	ENSG00000148154.10	UGCG	trans	0.000954682	-1.62924	1.0734e-07	-0.272665
chr14_21460885_-	ENSG00000129472.15	RAB2B	0.00475323	12.7831	6.09432e-06	0.233314	hsa-miR-10399-5p	ENSG00000148229.13	POLE3	trans	0.0284447	-1.50582	3.24225e-05	-0.21483
chr14_21460885_-	ENSG00000129472.15	RAB2B	0.00475323	12.7831	6.09432e-06	0.233314	hsa-miR-10399-5p	ENSG00000148399.13	DPH7	trans	0.0445589	-1.5649	9.91973e-05	-0.201513
chr14_21460885_-	ENSG00000129472.15	RAB2B	0.00475323	12.7831	6.09432e-06	0.233314	hsa-miR-10399-5p	ENSG00000148634.16	HERC4	trans	0.00989566	-6.76031	3.70506e-06	-0.238534
chr14_21460885_-	ENSG00000129472.15	RAB2B	0.00475323	12.7831	6.09432e-06	0.233314	hsa-miR-10399-5p	ENSG00000148672.9	GLUD1	trans	0.0252831	-3.32862	2.48822e-05	-0.217863
chr14_21460885_-	ENSG00000129472.15	RAB2B	0.00475323	12.7831	6.09432e-06	0.233314	hsa-miR-10399-5p	ENSG00000149100.13	EIF3M	trans	0.000770949	-8.47473	5.3706e-08	-0.278813
chr14_21460885_-	ENSG00000129472.15	RAB2B	0.00475323	12.7831	6.09432e-06	0.233314	hsa-miR-10399-5p	ENSG00000149231.15	CCDC82	trans	0.000188805	-2.04296	3.79053e-09	-0.301066
chr14_21460885_-	ENSG00000129472.15	RAB2B	0.00475323	12.7831	6.09432e-06	0.233314	hsa-miR-10399-5p	ENSG00000149262.17	INTS4	trans	0.0351708	-2.4264	4.94301e-05	-0.209906
chr14_21460885_-	ENSG00000129472.15	RAB2B	0.00475323	12.7831	6.09432e-06	0.233314	hsa-miR-10399-5p	ENSG00000149273.15	RPS3	trans	0.000614559	-85.6373	9.34323e-08	-0.273909
chr14_21460885_-	ENSG00000129472.15	RAB2B	0.00475323	12.7831	6.09432e-06	0.233314	hsa-miR-10399-5p	ENSG00000149311.19	ATM	trans	0.00323789	-17.9311	1.36193e-06	-0.248686
chr14_21460885_-	ENSG00000129472.15	RAB2B	0.00475323	12.7831	6.09432e-06	0.233314	hsa-miR-10399-5p	ENSG00000150054.18	MPP7	trans	0.0116507	-1.46609	5.09589e-06	-0.235205
chr14_21460885_-	ENSG00000129472.15	RAB2B	0.00475323	12.7831	6.09432e-06	0.233314	hsa-miR-10399-5p	ENSG00000150316.12	CWC15	trans	0.000445327	-2.10096	6.74431e-09	-0.29639
chr14_21460885_-	ENSG00000129472.15	RAB2B	0.00475323	12.7831	6.09432e-06	0.233314	hsa-miR-10399-5p	ENSG00000150347.16	ARID5B	trans	0.00233267	-1.66133	5.38998e-07	-0.257713
chr14_21460885_-	ENSG00000129472.15	RAB2B	0.00475323	12.7831	6.09432e-06	0.233314	hsa-miR-10399-5p	ENSG00000150527.17	MIA2	trans	0.00974843	-1.97839	2.07022e-06	-0.244492
chr14_21460885_-	ENSG00000129472.15	RAB2B	0.00475323	12.7831	6.09432e-06	0.233314	hsa-miR-10399-5p	ENSG00000150593.18	PDCD4	trans	0.048384	-10.5505	0.000135497	-0.197642
chr14_21460885_-	ENSG00000129472.15	RAB2B	0.00475323	12.7831	6.09432e-06	0.233314	hsa-miR-10399-5p	ENSG00000150712.11	MTMR12	trans	0.0247267	-1.31567	2.78012e-05	-0.216597
chr14_21460885_-	ENSG00000129472.15	RAB2B	0.00475323	12.7831	6.09432e-06	0.233314	hsa-miR-10399-5p	ENSG00000150907.10	FOXO1	trans	0.000190445	-1.84195	1.07806e-08	-0.29252
chr14_21460885_-	ENSG00000129472.15	RAB2B	0.00475323	12.7831	6.09432e-06	0.233314	hsa-miR-10399-5p	ENSG00000150995.20	ITPR1	trans	0.032936	-7.00805	5.58765e-05	-0.208454
chr14_21460885_-	ENSG00000129472.15	RAB2B	0.00475323	12.7831	6.09432e-06	0.233314	hsa-miR-10399-5p	ENSG00000151247.12	EIF4E	trans	0.00308908	-3.02682	5.60119e-07	-0.257345
chr14_21460885_-	ENSG00000129472.15	RAB2B	0.00475323	12.7831	6.09432e-06	0.233314	hsa-miR-10399-5p	ENSG00000151923.17	TIAL1	trans	0.00451179	-2.76424	9.04299e-07	-0.252716
chr14_21460885_-	ENSG00000129472.15	RAB2B	0.00475323	12.7831	6.09432e-06	0.233314	hsa-miR-10399-5p	ENSG00000152256.14	PDK1	trans	0.0100623	-1.91394	8.51909e-06	-0.229732
chr14_21460885_-	ENSG00000129472.15	RAB2B	0.00475323	12.7831	6.09432e-06	0.233314	hsa-miR-10399-5p	ENSG00000152270.9	PDE3B	trans	0.009662	-5.40537	8.28879e-06	-0.230027
chr14_21460885_-	ENSG00000129472.15	RAB2B	0.00475323	12.7831	6.09432e-06	0.233314	hsa-miR-10399-5p	ENSG00000152443.13	ZNF776	trans	0.0150392	-2.26783	6.64791e-06	-0.23239
chr14_21460885_-	ENSG00000129472.15	RAB2B	0.00475323	12.7831	6.09432e-06	0.233314	hsa-miR-10399-5p	ENSG00000152495.11	CAMK4	trans	0.000110855	-4.83173	3.90208e-08	-0.281599
chr14_21460885_-	ENSG00000129472.15	RAB2B	0.00475323	12.7831	6.09432e-06	0.233314	hsa-miR-10399-5p	ENSG00000152795.17	HNRNPDL	trans	0.00425945	-7.08329	1.26917e-06	-0.249385
chr14_21460885_-	ENSG00000129472.15	RAB2B	0.00475323	12.7831	6.09432e-06	0.233314	hsa-miR-10399-5p	ENSG00000153037.15	SRP19	trans	0.00270262	-2.9735	2.46092e-07	-0.265091
chr14_21460885_-	ENSG00000129472.15	RAB2B	0.00475323	12.7831	6.09432e-06	0.233314	hsa-miR-10399-5p	ENSG00000153147.6	SMARCA5	trans	0.000125763	-2.71908	3.66836e-09	-0.30133
chr14_21460885_-	ENSG00000129472.15	RAB2B	0.00475323	12.7831	6.09432e-06	0.233314	hsa-miR-10399-5p	ENSG00000153250.20	RBMS1	trans	0.041509	-4.52639	6.89355e-05	-0.205941
chr14_21460885_-	ENSG00000129472.15	RAB2B	0.00475323	12.7831	6.09432e-06	0.233314	hsa-miR-10399-5p	ENSG00000153283.13	CD96	trans	0.000588847	-4.69152	7.48461e-08	-0.275885
chr14_21460885_-	ENSG00000129472.15	RAB2B	0.00475323	12.7831	6.09432e-06	0.233314	hsa-miR-10399-5p	ENSG00000153914.16	SREK1	trans	0.00140401	-5.96142	1.74638e-07	-0.26825
chr14_21460885_-	ENSG00000129472.15	RAB2B	0.00475323	12.7831	6.09432e-06	0.233314	hsa-miR-10399-5p	ENSG00000153944.12	MSI2	trans	0.0435367	-3.56662	0.000105732	-0.200727
chr14_21460885_-	ENSG00000129472.15	RAB2B	0.00475323	12.7831	6.09432e-06	0.233314	hsa-miR-10399-5p	ENSG00000154144.13	TBRG1	trans	0.0196527	-2.71941	2.06019e-05	-0.22
chr14_21460885_-	ENSG00000129472.15	RAB2B	0.00475323	12.7831	6.09432e-06	0.233314	hsa-miR-10399-5p	ENSG00000154174.8	TOMM70	trans	0.00339079	-1.54401	1.06569e-07	-0.272729
chr14_21460885_-	ENSG00000129472.15	RAB2B	0.00475323	12.7831	6.09432e-06	0.233314	hsa-miR-10399-5p	ENSG00000154217.15	PITPNC1	trans	0.0232366	-1.77855	4.21731e-05	-0.211773
chr14_21460885_-	ENSG00000129472.15	RAB2B	0.00475323	12.7831	6.09432e-06	0.233314	hsa-miR-10399-5p	ENSG00000154473.18	BUB3	trans	0.00389558	-5.74619	1.82835e-06	-0.245745
chr14_21460885_-	ENSG00000129472.15	RAB2B	0.00475323	12.7831	6.09432e-06	0.233314	hsa-miR-10399-5p	ENSG00000154814.14	OXNAD1	trans	0.0178235	-6.1982	0.000107506	-0.200522
chr14_21460885_-	ENSG00000129472.15	RAB2B	0.00475323	12.7831	6.09432e-06	0.233314	hsa-miR-10399-5p	ENSG00000155307.19	SAMSN1	trans	0.0429574	-1.88795	4.69931e-05	-0.210503
chr14_21460885_-	ENSG00000129472.15	RAB2B	0.00475323	12.7831	6.09432e-06	0.233314	hsa-miR-10399-5p	ENSG00000156110.15	ADK	trans	0.0143033	-1.48336	9.90346e-06	-0.228102
chr14_21460885_-	ENSG00000129472.15	RAB2B	0.00475323	12.7831	6.09432e-06	0.233314	hsa-miR-10399-5p	ENSG00000156171.15	DRAM2	trans	0.000652546	-2.09321	4.39114e-08	-0.280573
chr14_21460885_-	ENSG00000129472.15	RAB2B	0.00475323	12.7831	6.09432e-06	0.233314	hsa-miR-10399-5p	ENSG00000156471.13	PTDSS1	trans	0.0132427	-3.12179	9.11768e-06	-0.228998
chr14_21460885_-	ENSG00000129472.15	RAB2B	0.00475323	12.7831	6.09432e-06	0.233314	hsa-miR-10399-5p	ENSG00000156508.19	EEF1A1	trans	9.05434e-06	-626.352	1.83684e-10	-0.324365
chr14_21460885_-	ENSG00000129472.15	RAB2B	0.00475323	12.7831	6.09432e-06	0.233314	hsa-miR-10399-5p	ENSG00000156650.14	KAT6B	trans	0.00545082	-3.02936	6.78494e-07	-0.255503
chr14_21460885_-	ENSG00000129472.15	RAB2B	0.00475323	12.7831	6.09432e-06	0.233314	hsa-miR-10399-5p	ENSG00000156671.15	SAMD8	trans	0.0323161	-1.36564	3.09585e-05	-0.215362
chr14_21460885_-	ENSG00000129472.15	RAB2B	0.00475323	12.7831	6.09432e-06	0.233314	hsa-miR-10399-5p	ENSG00000156958.15	GALK2	trans	0.0110279	-2.13583	7.79685e-06	-0.230685
chr14_21460885_-	ENSG00000129472.15	RAB2B	0.00475323	12.7831	6.09432e-06	0.233314	hsa-miR-10399-5p	ENSG00000156990.14	RPUSD3	trans	0.0342383	-2.07092	6.06958e-05	-0.207467
chr14_21460885_-	ENSG00000129472.15	RAB2B	0.00475323	12.7831	6.09432e-06	0.233314	hsa-miR-10399-5p	ENSG00000157106.17	SMG1	trans	0.0470967	-6.749	9.84942e-05	-0.201601
chr14_21460885_-	ENSG00000129472.15	RAB2B	0.00475323	12.7831	6.09432e-06	0.233314	hsa-miR-10399-5p	ENSG00000157259.8	GATAD1	trans	0.0245155	-1.55355	1.63913e-05	-0.222561
chr14_21460885_-	ENSG00000129472.15	RAB2B	0.00475323	12.7831	6.09432e-06	0.233314	hsa-miR-10399-5p	ENSG00000157450.16	RNF111	trans	0.00709943	-4.01787	1.78006e-06	-0.246013
chr14_21460885_-	ENSG00000129472.15	RAB2B	0.00475323	12.7831	6.09432e-06	0.233314	hsa-miR-10399-5p	ENSG00000157500.12	APPL1	trans	0.0199429	-1.38807	1.02944e-05	-0.227682
chr14_21460885_-	ENSG00000129472.15	RAB2B	0.00475323	12.7831	6.09432e-06	0.233314	hsa-miR-10399-5p	ENSG00000157764.14	BRAF	trans	0.0398419	-2.81362	4.57162e-05	-0.210827
chr14_21460885_-	ENSG00000129472.15	RAB2B	0.00475323	12.7831	6.09432e-06	0.233314	hsa-miR-10399-5p	ENSG00000157823.17	AP3S2	trans	0.0131677	-3.05169	4.09749e-06	-0.237488
chr14_21460885_-	ENSG00000129472.15	RAB2B	0.00475323	12.7831	6.09432e-06	0.233314	hsa-miR-10399-5p	ENSG00000157978.12	LDLRAP1	trans	0.0114096	-2.66434	9.33334e-06	-0.228745
chr14_21460885_-	ENSG00000129472.15	RAB2B	0.00475323	12.7831	6.09432e-06	0.233314	hsa-miR-10399-5p	ENSG00000158092.7	NCK1	trans	0.0133308	-2.13249	1.8866e-06	-0.245429
chr14_21460885_-	ENSG00000129472.15	RAB2B	0.00475323	12.7831	6.09432e-06	0.233314	hsa-miR-10399-5p	ENSG00000158290.18	CUL4B	trans	0.0243953	-1.97516	2.45495e-05	-0.218016
chr14_21460885_-	ENSG00000129472.15	RAB2B	0.00475323	12.7831	6.09432e-06	0.233314	hsa-miR-10399-5p	ENSG00000158636.16	EMSY	trans	0.0479675	-2.39262	8.14655e-05	-0.203921
chr14_21460885_-	ENSG00000129472.15	RAB2B	0.00475323	12.7831	6.09432e-06	0.233314	hsa-miR-10399-5p	ENSG00000158711.14	ELK4	trans	0.00908611	-2.26151	5.11674e-06	-0.235162
chr14_21460885_-	ENSG00000129472.15	RAB2B	0.00475323	12.7831	6.09432e-06	0.233314	hsa-miR-10399-5p	ENSG00000158985.14	CDC42SE2	trans	0.00917439	-8.96206	2.5687e-06	-0.242302
chr14_21460885_-	ENSG00000129472.15	RAB2B	0.00475323	12.7831	6.09432e-06	0.233314	hsa-miR-10399-5p	ENSG00000158987.22	RAPGEF6	trans	0.00169018	-4.13606	3.78068e-07	-0.261078
chr14_21460885_-	ENSG00000129472.15	RAB2B	0.00475323	12.7831	6.09432e-06	0.233314	hsa-miR-10399-5p	ENSG00000159140.21	SON	trans	0.0347517	-28.4547	5.89206e-05	-0.207822
chr14_21460885_-	ENSG00000129472.15	RAB2B	0.00475323	12.7831	6.09432e-06	0.233314	hsa-miR-10399-5p	ENSG00000159202.18	UBE2Z	trans	0.0349302	-2.65706	6.78049e-05	-0.20614
chr14_21460885_-	ENSG00000129472.15	RAB2B	0.00475323	12.7831	6.09432e-06	0.233314	hsa-miR-10399-5p	ENSG00000159216.19	RUNX1	trans	0.0128174	-4.89623	3.46114e-06	-0.239239
chr14_21460885_-	ENSG00000129472.15	RAB2B	0.00475323	12.7831	6.09432e-06	0.233314	hsa-miR-10399-5p	ENSG00000159256.13	MORC3	trans	0.00584267	-4.64674	1.63519e-06	-0.246864
chr14_21460885_-	ENSG00000129472.15	RAB2B	0.00475323	12.7831	6.09432e-06	0.233314	hsa-miR-10399-5p	ENSG00000159445.13	THEM4	trans	0.000986085	-2.63206	2.69329e-07	-0.264254
chr14_21460885_-	ENSG00000129472.15	RAB2B	0.00475323	12.7831	6.09432e-06	0.233314	hsa-miR-10399-5p	ENSG00000159579.14	RSPRY1	trans	0.020433	-1.7649	1.47618e-05	-0.223724
chr14_21460885_-	ENSG00000129472.15	RAB2B	0.00475323	12.7831	6.09432e-06	0.233314	hsa-miR-10399-5p	ENSG00000159593.15	NAE1	trans	0.000209119	-1.98313	1.27053e-08	-0.291151
chr14_21460885_-	ENSG00000129472.15	RAB2B	0.00475323	12.7831	6.09432e-06	0.233314	hsa-miR-10399-5p	ENSG00000160563.14	MED27	trans	0.0287177	-1.38034	3.55365e-05	-0.213769
chr14_21460885_-	ENSG00000129472.15	RAB2B	0.00475323	12.7831	6.09432e-06	0.233314	hsa-miR-10399-5p	ENSG00000160688.19	FLAD1	trans	0.0311785	-1.39358	2.91642e-05	-0.216048
chr14_21460885_-	ENSG00000129472.15	RAB2B	0.00475323	12.7831	6.09432e-06	0.233314	hsa-miR-10399-5p	ENSG00000161405.17	IKZF3	trans	0.00366767	-4.31476	1.32108e-06	-0.248988
chr14_21460885_-	ENSG00000129472.15	RAB2B	0.00475323	12.7831	6.09432e-06	0.233314	hsa-miR-10399-5p	ENSG00000161920.11	MED11	trans	0.0194117	-2.20287	1.26819e-05	-0.2254
chr14_21460885_-	ENSG00000129472.15	RAB2B	0.00475323	12.7831	6.09432e-06	0.233314	hsa-miR-10399-5p	ENSG00000162086.16	ZNF75A	trans	0.000463875	-3.20005	2.82773e-08	-0.284377
chr14_21460885_-	ENSG00000129472.15	RAB2B	0.00475323	12.7831	6.09432e-06	0.233314	hsa-miR-10399-5p	ENSG00000162144.10	CYB561A3	trans	0.00620325	-2.99656	2.70698e-06	-0.241766
chr14_21460885_-	ENSG00000129472.15	RAB2B	0.00475323	12.7831	6.09432e-06	0.233314	hsa-miR-10399-5p	ENSG00000162521.19	RBBP4	trans	0.0096768	-4.33435	4.03907e-06	-0.237637
chr14_21460885_-	ENSG00000129472.15	RAB2B	0.00475323	12.7831	6.09432e-06	0.233314	hsa-miR-10399-5p	ENSG00000162600.12	OMA1	trans	0.00190489	-2.29718	2.0336e-07	-0.266853
chr14_21460885_-	ENSG00000129472.15	RAB2B	0.00475323	12.7831	6.09432e-06	0.233314	hsa-miR-10399-5p	ENSG00000162604.12	TM2D1	trans	0.00758424	-2.99001	1.86924e-06	-0.245522
chr14_21460885_-	ENSG00000129472.15	RAB2B	0.00475323	12.7831	6.09432e-06	0.233314	hsa-miR-10399-5p	ENSG00000162613.17	FUBP1	trans	0.0171635	-5.06671	2.64155e-05	-0.217181
chr14_21460885_-	ENSG00000129472.15	RAB2B	0.00475323	12.7831	6.09432e-06	0.233314	hsa-miR-10399-5p	ENSG00000162735.19	PEX19	trans	0.0077996	-2.04183	6.27526e-06	-0.233004
chr14_21460885_-	ENSG00000129472.15	RAB2B	0.00475323	12.7831	6.09432e-06	0.233314	hsa-miR-10399-5p	ENSG00000162739.14	SLAMF6	trans	0.0033652	-1.83385	6.82554e-07	-0.255446
chr14_21460885_-	ENSG00000129472.15	RAB2B	0.00475323	12.7831	6.09432e-06	0.233314	hsa-miR-10399-5p	ENSG00000162852.14	CNST	trans	0.013637	-2.15054	1.87005e-05	-0.221089
chr14_21460885_-	ENSG00000129472.15	RAB2B	0.00475323	12.7831	6.09432e-06	0.233314	hsa-miR-10399-5p	ENSG00000162928.9	PEX13	trans	0.00105095	-1.4007	8.49346e-08	-0.27476
chr14_21460885_-	ENSG00000129472.15	RAB2B	0.00475323	12.7831	6.09432e-06	0.233314	hsa-miR-10399-5p	ENSG00000162959.13	MEMO1	trans	0.0236	-1.82877	1.30317e-05	-0.225101
chr14_21460885_-	ENSG00000129472.15	RAB2B	0.00475323	12.7831	6.09432e-06	0.233314	hsa-miR-10399-5p	ENSG00000162980.17	ARL5A	trans	0.00421542	-2.865	8.66925e-07	-0.253128
chr14_21460885_-	ENSG00000129472.15	RAB2B	0.00475323	12.7831	6.09432e-06	0.233314	hsa-miR-10399-5p	ENSG00000163131.11	CTSS	trans	0.0412975	-93.2096	4.96627e-05	-0.209851
chr14_21460885_-	ENSG00000129472.15	RAB2B	0.00475323	12.7831	6.09432e-06	0.233314	hsa-miR-10399-5p	ENSG00000163257.11	DCAF16	trans	0.0467355	-1.77767	0.000129278	-0.19823
chr14_21460885_-	ENSG00000129472.15	RAB2B	0.00475323	12.7831	6.09432e-06	0.233314	hsa-miR-10399-5p	ENSG00000163539.17	CLASP2	trans	0.00570116	-2.77741	9.39228e-07	-0.252346
chr14_21460885_-	ENSG00000129472.15	RAB2B	0.00475323	12.7831	6.09432e-06	0.233314	hsa-miR-10399-5p	ENSG00000163564.15	PYHIN1	trans	0.0110954	-3.80283	3.91496e-06	-0.237962
chr14_21460885_-	ENSG00000129472.15	RAB2B	0.00475323	12.7831	6.09432e-06	0.233314	hsa-miR-10399-5p	ENSG00000163626.17	COX18	trans	0.00561678	-1.90347	1.47759e-06	-0.247876
chr14_21460885_-	ENSG00000129472.15	RAB2B	0.00475323	12.7831	6.09432e-06	0.233314	hsa-miR-10399-5p	ENSG00000163644.15	PPM1K	trans	0.0482663	-2.88901	0.000245185	-0.190069
chr14_21460885_-	ENSG00000129472.15	RAB2B	0.00475323	12.7831	6.09432e-06	0.233314	hsa-miR-10399-5p	ENSG00000163681.16	SLMAP	trans	0.0450917	-3.0486	6.2547e-05	-0.207108
chr14_21460885_-	ENSG00000129472.15	RAB2B	0.00475323	12.7831	6.09432e-06	0.233314	hsa-miR-10399-5p	ENSG00000163714.18	U2SURP	trans	0.00377568	-6.03464	6.86415e-07	-0.255391
chr14_21460885_-	ENSG00000129472.15	RAB2B	0.00475323	12.7831	6.09432e-06	0.233314	hsa-miR-10399-5p	ENSG00000163728.11	TTC14	trans	0.000738808	-6.56233	1.01459e-07	-0.273171
chr14_21460885_-	ENSG00000129472.15	RAB2B	0.00475323	12.7831	6.09432e-06	0.233314	hsa-miR-10399-5p	ENSG00000163867.17	ZMYM6	trans	0.0167725	-1.60282	8.59908e-06	-0.229631
chr14_21460885_-	ENSG00000129472.15	RAB2B	0.00475323	12.7831	6.09432e-06	0.233314	hsa-miR-10399-5p	ENSG00000163875.16	MEAF6	trans	0.0219541	-3.65539	3.07329e-05	-0.215446
chr14_21460885_-	ENSG00000129472.15	RAB2B	0.00475323	12.7831	6.09432e-06	0.233314	hsa-miR-10399-5p	ENSG00000164048.14	ZNF589	trans	0.000440335	-1.98401	3.44249e-08	-0.282684
chr14_21460885_-	ENSG00000129472.15	RAB2B	0.00475323	12.7831	6.09432e-06	0.233314	hsa-miR-10399-5p	ENSG00000164073.11	MFSD8	trans	0.0210967	-2.25666	1.51178e-05	-0.22346
chr14_21460885_-	ENSG00000129472.15	RAB2B	0.00475323	12.7831	6.09432e-06	0.233314	hsa-miR-10399-5p	ENSG00000164134.13	NAA15	trans	0.00274525	-2.02004	7.33197e-07	-0.254754
chr14_21460885_-	ENSG00000129472.15	RAB2B	0.00475323	12.7831	6.09432e-06	0.233314	hsa-miR-10399-5p	ENSG00000164164.17	OTUD4	trans	0.0102644	-1.92595	3.92473e-06	-0.237936
chr14_21460885_-	ENSG00000129472.15	RAB2B	0.00475323	12.7831	6.09432e-06	0.233314	hsa-miR-10399-5p	ENSG00000164180.14	TMEM161B	trans	0.000180669	-1.98489	1.67996e-09	-0.307532
chr14_21460885_-	ENSG00000129472.15	RAB2B	0.00475323	12.7831	6.09432e-06	0.233314	hsa-miR-10399-5p	ENSG00000164300.17	SERINC5	trans	0.00966671	-2.4845	1.06679e-05	-0.227293
chr14_21460885_-	ENSG00000129472.15	RAB2B	0.00475323	12.7831	6.09432e-06	0.233314	hsa-miR-10399-5p	ENSG00000164331.10	ANKRA2	trans	0.000709475	-2.85119	2.82079e-08	-0.284398
chr14_21460885_-	ENSG00000129472.15	RAB2B	0.00475323	12.7831	6.09432e-06	0.233314	hsa-miR-10399-5p	ENSG00000164346.10	NSA2	trans	0.00381857	-4.90017	1.10893e-06	-0.250717
chr14_21460885_-	ENSG00000129472.15	RAB2B	0.00475323	12.7831	6.09432e-06	0.233314	hsa-miR-10399-5p	ENSG00000164654.16	MIOS	trans	0.00549801	-1.55577	5.78221e-07	-0.257041
chr14_21460885_-	ENSG00000129472.15	RAB2B	0.00475323	12.7831	6.09432e-06	0.233314	hsa-miR-10399-5p	ENSG00000164751.15	PEX2	trans	0.000378093	-2.38615	1.30087e-08	-0.290954
chr14_21460885_-	ENSG00000129472.15	RAB2B	0.00475323	12.7831	6.09432e-06	0.233314	hsa-miR-10399-5p	ENSG00000164754.15	RAD21	trans	0.00982923	-5.73314	3.69059e-06	-0.238575
chr14_21460885_-	ENSG00000129472.15	RAB2B	0.00475323	12.7831	6.09432e-06	0.233314	hsa-miR-10399-5p	ENSG00000164830.18	OXR1	trans	0.00999057	-2.18005	3.23736e-06	-0.239929
chr14_21460885_-	ENSG00000129472.15	RAB2B	0.00475323	12.7831	6.09432e-06	0.233314	hsa-miR-10399-5p	ENSG00000164941.14	INTS8	trans	0.0420584	-4.66293	5.51795e-05	-0.208603
chr14_21460885_-	ENSG00000129472.15	RAB2B	0.00475323	12.7831	6.09432e-06	0.233314	hsa-miR-10399-5p	ENSG00000164985.15	PSIP1	trans	0.00228442	-5.67472	4.41445e-07	-0.259614
chr14_21460885_-	ENSG00000129472.15	RAB2B	0.00475323	12.7831	6.09432e-06	0.233314	hsa-miR-10399-5p	ENSG00000165288.11	BRWD3	trans	0.0206496	-2.62797	1.24287e-05	-0.225622
chr14_21460885_-	ENSG00000129472.15	RAB2B	0.00475323	12.7831	6.09432e-06	0.233314	hsa-miR-10399-5p	ENSG00000165416.15	SUGT1	trans	0.0332498	-1.69022	5.0516e-05	-0.20965
chr14_21460885_-	ENSG00000129472.15	RAB2B	0.00475323	12.7831	6.09432e-06	0.233314	hsa-miR-10399-5p	ENSG00000165516.11	KLHDC2	trans	0.000747988	-3.55771	4.22376e-08	-0.280911
chr14_21460885_-	ENSG00000129472.15	RAB2B	0.00475323	12.7831	6.09432e-06	0.233314	hsa-miR-10399-5p	ENSG00000165609.13	NUDT5	trans	0.0167496	-4.11708	1.00744e-05	-0.227916
chr14_21460885_-	ENSG00000129472.15	RAB2B	0.00475323	12.7831	6.09432e-06	0.233314	hsa-miR-10399-5p	ENSG00000165669.14	FAM204A	trans	0.0134677	-2.7974	5.02514e-06	-0.235352
chr14_21460885_-	ENSG00000129472.15	RAB2B	0.00475323	12.7831	6.09432e-06	0.233314	hsa-miR-10399-5p	ENSG00000165671.21	NSD1	trans	0.0250056	-4.93619	3.0249e-05	-0.215629
chr14_21460885_-	ENSG00000129472.15	RAB2B	0.00475323	12.7831	6.09432e-06	0.233314	hsa-miR-10399-5p	ENSG00000165813.20	CCDC186	trans	0.00421802	-2.20914	6.54447e-07	-0.255851
chr14_21460885_-	ENSG00000129472.15	RAB2B	0.00475323	12.7831	6.09432e-06	0.233314	hsa-miR-10399-5p	ENSG00000165898.14	ISCA2	trans	0.0184738	-1.58805	1.80197e-05	-0.221504
chr14_21460885_-	ENSG00000129472.15	RAB2B	0.00475323	12.7831	6.09432e-06	0.233314	hsa-miR-10399-5p	ENSG00000165929.13	TC2N	trans	0.00335823	-7.76578	1.33648e-06	-0.248873
chr14_21460885_-	ENSG00000129472.15	RAB2B	0.00475323	12.7831	6.09432e-06	0.233314	hsa-miR-10399-5p	ENSG00000166012.17	TAF1D	trans	0.00142385	-10.8441	1.57999e-07	-0.269165
chr14_21460885_-	ENSG00000129472.15	RAB2B	0.00475323	12.7831	6.09432e-06	0.233314	hsa-miR-10399-5p	ENSG00000166170.10	BAG5	trans	0.00456468	-1.5141	5.65961e-07	-0.257246
chr14_21460885_-	ENSG00000129472.15	RAB2B	0.00475323	12.7831	6.09432e-06	0.233314	hsa-miR-10399-5p	ENSG00000166200.15	COPS2	trans	0.012265	-1.80531	5.68572e-06	-0.234049
chr14_21460885_-	ENSG00000129472.15	RAB2B	0.00475323	12.7831	6.09432e-06	0.233314	hsa-miR-10399-5p	ENSG00000166260.13	COX11	trans	0.00129193	-3.31206	9.34986e-08	-0.273902
chr14_21460885_-	ENSG00000129472.15	RAB2B	0.00475323	12.7831	6.09432e-06	0.233314	hsa-miR-10399-5p	ENSG00000166295.9	ANAPC16	trans	0.000357477	-5.03862	2.87554e-08	-0.284233
chr14_21460885_-	ENSG00000129472.15	RAB2B	0.00475323	12.7831	6.09432e-06	0.233314	hsa-miR-10399-5p	ENSG00000166562.9	SEC11C	trans	0.000585986	-2.50162	1.00631e-08	-0.293092
chr14_21460885_-	ENSG00000129472.15	RAB2B	0.00475323	12.7831	6.09432e-06	0.233314	hsa-miR-10399-5p	ENSG00000166669.13	ATF7IP2	trans	0.0132212	-2.07166	1.15575e-05	-0.226419
chr14_21460885_-	ENSG00000129472.15	RAB2B	0.00475323	12.7831	6.09432e-06	0.233314	hsa-miR-10399-5p	ENSG00000166750.10	SLFN5	trans	0.00632896	-5.08921	2.80262e-06	-0.241411
chr14_21460885_-	ENSG00000129472.15	RAB2B	0.00475323	12.7831	6.09432e-06	0.233314	hsa-miR-10399-5p	ENSG00000166797.11	CIAO2A	trans	0.00844013	-3.04984	2.67125e-06	-0.241902
chr14_21460885_-	ENSG00000129472.15	RAB2B	0.00475323	12.7831	6.09432e-06	0.233314	hsa-miR-10399-5p	ENSG00000166855.9	CLPX	trans	0.0339332	-2.0617	4.81547e-05	-0.210215
chr14_21460885_-	ENSG00000129472.15	RAB2B	0.00475323	12.7831	6.09432e-06	0.233314	hsa-miR-10399-5p	ENSG00000167005.14	NUDT21	trans	0.0267744	-3.09926	1.24575e-05	-0.225596
chr14_21460885_-	ENSG00000129472.15	RAB2B	0.00475323	12.7831	6.09432e-06	0.233314	hsa-miR-10399-5p	ENSG00000167258.15	CDK12	trans	0.0477999	-3.36446	9.16867e-05	-0.202479
chr14_21460885_-	ENSG00000129472.15	RAB2B	0.00475323	12.7831	6.09432e-06	0.233314	hsa-miR-10399-5p	ENSG00000167380.16	ZNF226	trans	6.25646e-05	-2.67793	5.55966e-10	-0.316074
chr14_21460885_-	ENSG00000129472.15	RAB2B	0.00475323	12.7831	6.09432e-06	0.233314	hsa-miR-10399-5p	ENSG00000167483.19	NIBAN3	trans	0.0227113	-3.03639	8.22422e-05	-0.203805
chr14_21460885_-	ENSG00000129472.15	RAB2B	0.00475323	12.7831	6.09432e-06	0.233314	hsa-miR-10399-5p	ENSG00000167526.14	RPL13	trans	0.000421657	-208.039	7.70331e-08	-0.275629
chr14_21460885_-	ENSG00000129472.15	RAB2B	0.00475323	12.7831	6.09432e-06	0.233314	hsa-miR-10399-5p	ENSG00000167555.14	ZNF528	trans	0.000549602	-2.54002	2.35665e-08	-0.285936
chr14_21460885_-	ENSG00000129472.15	RAB2B	0.00475323	12.7831	6.09432e-06	0.233314	hsa-miR-10399-5p	ENSG00000167562.13	ZNF701	trans	0.00102504	-2.0202	5.77798e-08	-0.278171
chr14_21460885_-	ENSG00000129472.15	RAB2B	0.00475323	12.7831	6.09432e-06	0.233314	hsa-miR-10399-5p	ENSG00000167613.16	LAIR1	trans	0.0443764	-3.19559	8.30491e-05	-0.203687
chr14_21460885_-	ENSG00000129472.15	RAB2B	0.00475323	12.7831	6.09432e-06	0.233314	hsa-miR-10399-5p	ENSG00000167766.18	ZNF83	trans	7.76354e-05	-4.7928	1.30442e-09	-0.30951
chr14_21460885_-	ENSG00000129472.15	RAB2B	0.00475323	12.7831	6.09432e-06	0.233314	hsa-miR-10399-5p	ENSG00000168092.14	PAFAH1B2	trans	0.0149274	-3.12565	5.10155e-06	-0.235193
chr14_21460885_-	ENSG00000129472.15	RAB2B	0.00475323	12.7831	6.09432e-06	0.233314	hsa-miR-10399-5p	ENSG00000168137.18	SETD5	trans	0.0228005	-4.66084	3.48501e-05	-0.213995
chr14_21460885_-	ENSG00000129472.15	RAB2B	0.00475323	12.7831	6.09432e-06	0.233314	hsa-miR-10399-5p	ENSG00000168172.9	HOOK3	trans	0.00495383	-1.89747	1.18505e-06	-0.250063
chr14_21460885_-	ENSG00000129472.15	RAB2B	0.00475323	12.7831	6.09432e-06	0.233314	hsa-miR-10399-5p	ENSG00000168259.17	DNAJC7	trans	0.0271408	-3.53394	2.63029e-05	-0.21723
chr14_21460885_-	ENSG00000129472.15	RAB2B	0.00475323	12.7831	6.09432e-06	0.233314	hsa-miR-10399-5p	ENSG00000168264.10	IRF2BP2	trans	0.0390634	-2.33198	5.50321e-05	-0.208635
chr14_21460885_-	ENSG00000129472.15	RAB2B	0.00475323	12.7831	6.09432e-06	0.233314	hsa-miR-10399-5p	ENSG00000168297.16	PXK	trans	0.0478001	-1.89446	8.60099e-05	-0.20326
chr14_21460885_-	ENSG00000129472.15	RAB2B	0.00475323	12.7831	6.09432e-06	0.233314	hsa-miR-10399-5p	ENSG00000168438.15	CDC40	trans	0.00411357	-1.95913	9.51933e-07	-0.252215
chr14_21460885_-	ENSG00000129472.15	RAB2B	0.00475323	12.7831	6.09432e-06	0.233314	hsa-miR-10399-5p	ENSG00000168439.17	STIP1	trans	0.0181309	-3.48738	2.14066e-05	-0.219568
chr14_21460885_-	ENSG00000129472.15	RAB2B	0.00475323	12.7831	6.09432e-06	0.233314	hsa-miR-10399-5p	ENSG00000168685.15	IL7R	trans	0.000376517	-28.9903	1.60067e-07	-0.269046
chr14_21460885_-	ENSG00000129472.15	RAB2B	0.00475323	12.7831	6.09432e-06	0.233314	hsa-miR-10399-5p	ENSG00000168724.17	DNAJC21	trans	0.00101741	-1.68792	1.05565e-07	-0.272814
chr14_21460885_-	ENSG00000129472.15	RAB2B	0.00475323	12.7831	6.09432e-06	0.233314	hsa-miR-10399-5p	ENSG00000168827.15	GFM1	trans	0.0247993	-2.05948	2.87388e-05	-0.216217
chr14_21460885_-	ENSG00000129472.15	RAB2B	0.00475323	12.7831	6.09432e-06	0.233314	hsa-miR-10399-5p	ENSG00000168887.11	C2orf68	trans	0.0205925	-3.49087	1.50929e-05	-0.223479
chr14_21460885_-	ENSG00000129472.15	RAB2B	0.00475323	12.7831	6.09432e-06	0.233314	hsa-miR-10399-5p	ENSG00000168906.13	MAT2A	trans	0.0272634	-4.06633	4.45788e-05	-0.211123
chr14_21460885_-	ENSG00000129472.15	RAB2B	0.00475323	12.7831	6.09432e-06	0.233314	hsa-miR-10399-5p	ENSG00000168944.17	CEP120	trans	0.00648501	-1.69285	1.91682e-06	-0.245269
chr14_21460885_-	ENSG00000129472.15	RAB2B	0.00475323	12.7831	6.09432e-06	0.233314	hsa-miR-10399-5p	ENSG00000169018.6	FEM1B	trans	0.0355478	-1.49324	6.3625e-05	-0.206903
chr14_21460885_-	ENSG00000129472.15	RAB2B	0.00475323	12.7831	6.09432e-06	0.233314	hsa-miR-10399-5p	ENSG00000169239.13	CA5B	trans	0.00259055	-2.30551	1.78505e-06	-0.245985
chr14_21460885_-	ENSG00000129472.15	RAB2B	0.00475323	12.7831	6.09432e-06	0.233314	hsa-miR-10399-5p	ENSG00000169359.16	SLC33A1	trans	0.0148899	-1.35492	1.11041e-05	-0.226856
chr14_21460885_-	ENSG00000129472.15	RAB2B	0.00475323	12.7831	6.09432e-06	0.233314	hsa-miR-10399-5p	ENSG00000169375.16	SIN3A	trans	0.036813	-2.54306	4.38916e-05	-0.211305
chr14_21460885_-	ENSG00000129472.15	RAB2B	0.00475323	12.7831	6.09432e-06	0.233314	hsa-miR-10399-5p	ENSG00000169567.13	HINT1	trans	0.000107103	-8.12273	5.37852e-09	-0.298236
chr14_21460885_-	ENSG00000129472.15	RAB2B	0.00475323	12.7831	6.09432e-06	0.233314	hsa-miR-10399-5p	ENSG00000169609.14	C15orf40	trans	0.00041049	-2.46145	1.30885e-08	-0.290903
chr14_21460885_-	ENSG00000129472.15	RAB2B	0.00475323	12.7831	6.09432e-06	0.233314	hsa-miR-10399-5p	ENSG00000170144.21	HNRNPA3	trans	0.00250566	-5.47174	3.9327e-07	-0.260707
chr14_21460885_-	ENSG00000129472.15	RAB2B	0.00475323	12.7831	6.09432e-06	0.233314	hsa-miR-10399-5p	ENSG00000170234.13	PWWP2A	trans	0.0350101	-1.97148	6.93174e-05	-0.205874
chr14_21460885_-	ENSG00000129472.15	RAB2B	0.00475323	12.7831	6.09432e-06	0.233314	hsa-miR-10399-5p	ENSG00000170242.19	USP47	trans	0.000936116	-3.60052	6.55444e-08	-0.27706
chr14_21460885_-	ENSG00000129472.15	RAB2B	0.00475323	12.7831	6.09432e-06	0.233314	hsa-miR-10399-5p	ENSG00000170340.11	B3GNT2	trans	0.034175	-1.21367	4.12833e-05	-0.212023
chr14_21460885_-	ENSG00000129472.15	RAB2B	0.00475323	12.7831	6.09432e-06	0.233314	hsa-miR-10399-5p	ENSG00000170348.9	TMED10	trans	0.0196559	-7.23155	1.57467e-05	-0.223008
chr14_21460885_-	ENSG00000129472.15	RAB2B	0.00475323	12.7831	6.09432e-06	0.233314	hsa-miR-10399-5p	ENSG00000170571.12	EMB	trans	0.0028073	-8.56978	3.69613e-07	-0.261292
chr14_21460885_-	ENSG00000129472.15	RAB2B	0.00475323	12.7831	6.09432e-06	0.233314	hsa-miR-10399-5p	ENSG00000170632.14	ARMC10	trans	0.00237341	-1.3443	3.61859e-07	-0.261491
chr14_21460885_-	ENSG00000129472.15	RAB2B	0.00475323	12.7831	6.09432e-06	0.233314	hsa-miR-10399-5p	ENSG00000170759.11	KIF5B	trans	0.016367	-2.33443	8.81353e-06	-0.229365
chr14_21460885_-	ENSG00000129472.15	RAB2B	0.00475323	12.7831	6.09432e-06	0.233314	hsa-miR-10399-5p	ENSG00000170791.18	CHCHD7	trans	0.00597738	-2.79136	7.94274e-07	-0.253979
chr14_21460885_-	ENSG00000129472.15	RAB2B	0.00475323	12.7831	6.09432e-06	0.233314	hsa-miR-10399-5p	ENSG00000170889.14	RPS9	trans	0.000970648	-119.947	1.50289e-07	-0.269621
chr14_21460885_-	ENSG00000129472.15	RAB2B	0.00475323	12.7831	6.09432e-06	0.233314	hsa-miR-10399-5p	ENSG00000170949.17	ZNF160	trans	0.0102882	-2.78973	4.99571e-06	-0.235414
chr14_21460885_-	ENSG00000129472.15	RAB2B	0.00475323	12.7831	6.09432e-06	0.233314	hsa-miR-10399-5p	ENSG00000171100.15	MTM1	trans	0.00744309	-1.90386	2.40502e-06	-0.242972
chr14_21460885_-	ENSG00000129472.15	RAB2B	0.00475323	12.7831	6.09432e-06	0.233314	hsa-miR-10399-5p	ENSG00000171469.11	ZNF561	trans	0.00417065	-2.65134	1.68431e-06	-0.246568
chr14_21460885_-	ENSG00000129472.15	RAB2B	0.00475323	12.7831	6.09432e-06	0.233314	hsa-miR-10399-5p	ENSG00000171490.13	RSL1D1	trans	3.98047e-05	-5.39478	6.04228e-10	-0.31544
chr14_21460885_-	ENSG00000129472.15	RAB2B	0.00475323	12.7831	6.09432e-06	0.233314	hsa-miR-10399-5p	ENSG00000171530.15	TBCA	trans	0.00042567	-3.51649	1.49318e-08	-0.289798
chr14_21460885_-	ENSG00000129472.15	RAB2B	0.00475323	12.7831	6.09432e-06	0.233314	hsa-miR-10399-5p	ENSG00000171681.12	ATF7IP	trans	0.0064559	-5.34129	1.84954e-06	-0.245629
chr14_21460885_-	ENSG00000129472.15	RAB2B	0.00475323	12.7831	6.09432e-06	0.233314	hsa-miR-10399-5p	ENSG00000171791.14	BCL2	trans	0.0050621	-4.31158	3.09134e-06	-0.240405
chr14_21460885_-	ENSG00000129472.15	RAB2B	0.00475323	12.7831	6.09432e-06	0.233314	hsa-miR-10399-5p	ENSG00000171960.12	PPIH	trans	0.00947754	-1.97422	4.73178e-06	-0.235984
chr14_21460885_-	ENSG00000129472.15	RAB2B	0.00475323	12.7831	6.09432e-06	0.233314	hsa-miR-10399-5p	ENSG00000172113.9	NME6	trans	0.019876	-2.34429	1.65354e-05	-0.222464
chr14_21460885_-	ENSG00000129472.15	RAB2B	0.00475323	12.7831	6.09432e-06	0.233314	hsa-miR-10399-5p	ENSG00000172175.15	MALT1	trans	7.23662e-05	-3.407	2.60133e-09	-0.304077
chr14_21460885_-	ENSG00000129472.15	RAB2B	0.00475323	12.7831	6.09432e-06	0.233314	hsa-miR-10399-5p	ENSG00000172575.12	RASGRP1	trans	0.00650235	-2.14071	2.62672e-06	-0.242074
chr14_21460885_-	ENSG00000129472.15	RAB2B	0.00475323	12.7831	6.09432e-06	0.233314	hsa-miR-10399-5p	ENSG00000172845.17	SP3	trans	0.0194207	-7.67994	1.33445e-05	-0.22484
chr14_21460885_-	ENSG00000129472.15	RAB2B	0.00475323	12.7831	6.09432e-06	0.233314	hsa-miR-10399-5p	ENSG00000172869.14	DMXL1	trans	0.00134587	-2.47035	1.66223e-07	-0.268702
chr14_21460885_-	ENSG00000129472.15	RAB2B	0.00475323	12.7831	6.09432e-06	0.233314	hsa-miR-10399-5p	ENSG00000172954.14	LCLAT1	trans	0.00193428	-1.76098	6.20736e-07	-0.25636
chr14_21460885_-	ENSG00000129472.15	RAB2B	0.00475323	12.7831	6.09432e-06	0.233314	hsa-miR-10399-5p	ENSG00000173011.12	TADA2B	trans	0.0492484	-2.22755	9.70798e-05	-0.201778
chr14_21460885_-	ENSG00000129472.15	RAB2B	0.00475323	12.7831	6.09432e-06	0.233314	hsa-miR-10399-5p	ENSG00000173214.7	MFSD4B	trans	0.00232161	-2.26941	4.65869e-07	-0.259102
chr14_21460885_-	ENSG00000129472.15	RAB2B	0.00475323	12.7831	6.09432e-06	0.233314	hsa-miR-10399-5p	ENSG00000173436.15	MICOS10	trans	0.00281397	-2.83679	1.83036e-07	-0.26782
chr14_21460885_-	ENSG00000129472.15	RAB2B	0.00475323	12.7831	6.09432e-06	0.233314	hsa-miR-10399-5p	ENSG00000173480.11	ZNF417	trans	0.0267546	-2.22538	5.78576e-05	-0.208039
chr14_21460885_-	ENSG00000129472.15	RAB2B	0.00475323	12.7831	6.09432e-06	0.233314	hsa-miR-10399-5p	ENSG00000173575.22	CHD2	trans	0.0238298	-13.6532	3.01689e-05	-0.215659
chr14_21460885_-	ENSG00000129472.15	RAB2B	0.00475323	12.7831	6.09432e-06	0.233314	hsa-miR-10399-5p	ENSG00000173726.11	TOMM20	trans	0.00289218	-2.13566	6.10014e-07	-0.256527
chr14_21460885_-	ENSG00000129472.15	RAB2B	0.00475323	12.7831	6.09432e-06	0.233314	hsa-miR-10399-5p	ENSG00000173875.14	ZNF791	trans	0.000762919	-1.93142	4.55423e-08	-0.280255
chr14_21460885_-	ENSG00000129472.15	RAB2B	0.00475323	12.7831	6.09432e-06	0.233314	hsa-miR-10399-5p	ENSG00000173889.16	PHC3	trans	0.00630485	-5.00885	2.88819e-06	-0.241103
chr14_21460885_-	ENSG00000129472.15	RAB2B	0.00475323	12.7831	6.09432e-06	0.233314	hsa-miR-10399-5p	ENSG00000174106.3	LEMD3	trans	0.029481	-3.57247	2.84287e-05	-0.216341
chr14_21460885_-	ENSG00000129472.15	RAB2B	0.00475323	12.7831	6.09432e-06	0.233314	hsa-miR-10399-5p	ENSG00000174197.16	MGA	trans	0.00607874	-2.37082	2.6117e-06	-0.242132
chr14_21460885_-	ENSG00000129472.15	RAB2B	0.00475323	12.7831	6.09432e-06	0.233314	hsa-miR-10399-5p	ENSG00000174428.18	GTF2IRD2B	trans	0.00727699	-2.16292	2.5908e-06	-0.242214
chr14_21460885_-	ENSG00000129472.15	RAB2B	0.00475323	12.7831	6.09432e-06	0.233314	hsa-miR-10399-5p	ENSG00000174444.15	RPL4	trans	3.03492e-06	-113.08	5.33974e-11	-0.333327
chr14_21460885_-	ENSG00000129472.15	RAB2B	0.00475323	12.7831	6.09432e-06	0.233314	hsa-miR-10399-5p	ENSG00000174446.13	SNAPC5	trans	0.0365083	-2.00895	1.98581e-05	-0.220414
chr14_21460885_-	ENSG00000129472.15	RAB2B	0.00475323	12.7831	6.09432e-06	0.233314	hsa-miR-10399-5p	ENSG00000174574.16	AKIRIN1	trans	0.0443352	-2.92514	9.65993e-05	-0.201839
chr14_21460885_-	ENSG00000129472.15	RAB2B	0.00475323	12.7831	6.09432e-06	0.233314	hsa-miR-10399-5p	ENSG00000174606.14	ANGEL2	trans	0.000835117	-4.78148	2.05679e-08	-0.287094
chr14_21460885_-	ENSG00000129472.15	RAB2B	0.00475323	12.7831	6.09432e-06	0.233314	hsa-miR-10399-5p	ENSG00000174738.13	NR1D2	trans	0.000457902	-1.77795	6.55183e-08	-0.277063
chr14_21460885_-	ENSG00000129472.15	RAB2B	0.00475323	12.7831	6.09432e-06	0.233314	hsa-miR-10399-5p	ENSG00000174796.12	THAP6	trans	0.00237298	-1.94236	8.12041e-08	-0.27516
chr14_21460885_-	ENSG00000129472.15	RAB2B	0.00475323	12.7831	6.09432e-06	0.233314	hsa-miR-10399-5p	ENSG00000174839.13	DENND6A	trans	0.0192303	-1.6651	7.62773e-06	-0.23092
chr14_21460885_-	ENSG00000129472.15	RAB2B	0.00475323	12.7831	6.09432e-06	0.233314	hsa-miR-10399-5p	ENSG00000174917.9	MICOS13	trans	0.00627858	-3.5462	3.16559e-06	-0.24016
chr14_21460885_-	ENSG00000129472.15	RAB2B	0.00475323	12.7831	6.09432e-06	0.233314	hsa-miR-10399-5p	ENSG00000175265.17	GOLGA8A	trans	0.0105447	-3.05766	9.21005e-06	-0.228889
chr14_21460885_-	ENSG00000129472.15	RAB2B	0.00475323	12.7831	6.09432e-06	0.233314	hsa-miR-10399-5p	ENSG00000175390.15	EIF3F	trans	0.000107676	-11.7737	3.727e-09	-0.301202
chr14_21460885_-	ENSG00000129472.15	RAB2B	0.00475323	12.7831	6.09432e-06	0.233314	hsa-miR-10399-5p	ENSG00000175455.16	CCDC14	trans	0.00914747	-1.91	2.99442e-06	-0.240732
chr14_21460885_-	ENSG00000129472.15	RAB2B	0.00475323	12.7831	6.09432e-06	0.233314	hsa-miR-10399-5p	ENSG00000175611.12	LINC00476	trans	0.0182306	-2.03834	1.41914e-05	-0.22416
chr14_21460885_-	ENSG00000129472.15	RAB2B	0.00475323	12.7831	6.09432e-06	0.233314	hsa-miR-10399-5p	ENSG00000175857.8	GAPT	trans	0.0196378	-3.83699	1.4201e-05	-0.224153
chr14_21460885_-	ENSG00000129472.15	RAB2B	0.00475323	12.7831	6.09432e-06	0.233314	hsa-miR-10399-5p	ENSG00000176155.19	CCDC57	trans	0.0191925	-3.03319	1.84032e-05	-0.221268
chr14_21460885_-	ENSG00000129472.15	RAB2B	0.00475323	12.7831	6.09432e-06	0.233314	hsa-miR-10399-5p	ENSG00000176261.15	ZBTB8OS	trans	0.00443369	-2.1087	7.53833e-07	-0.254486
chr14_21460885_-	ENSG00000129472.15	RAB2B	0.00475323	12.7831	6.09432e-06	0.233314	hsa-miR-10399-5p	ENSG00000176623.12	RMDN1	trans	0.00306155	-3.30096	6.55687e-07	-0.255833
chr14_21460885_-	ENSG00000129472.15	RAB2B	0.00475323	12.7831	6.09432e-06	0.233314	hsa-miR-10399-5p	ENSG00000177082.13	WDR73	trans	0.0131637	-1.9571	9.59395e-06	-0.228447
chr14_21460885_-	ENSG00000129472.15	RAB2B	0.00475323	12.7831	6.09432e-06	0.233314	hsa-miR-10399-5p	ENSG00000177189.14	RPS6KA3	trans	0.0411891	-3.40972	8.45595e-05	-0.203467
chr14_21460885_-	ENSG00000129472.15	RAB2B	0.00475323	12.7831	6.09432e-06	0.233314	hsa-miR-10399-5p	ENSG00000177200.17	CHD9	trans	0.00700308	-2.637	1.42605e-06	-0.248229
chr14_21460885_-	ENSG00000129472.15	RAB2B	0.00475323	12.7831	6.09432e-06	0.233314	hsa-miR-10399-5p	ENSG00000177410.13	ZFAS1	trans	0.00400199	-12.1979	4.4028e-07	-0.259639
chr14_21460885_-	ENSG00000129472.15	RAB2B	0.00475323	12.7831	6.09432e-06	0.233314	hsa-miR-10399-5p	ENSG00000177565.18	TBL1XR1	trans	0.0145139	-5.36759	9.66975e-06	-0.228362
chr14_21460885_-	ENSG00000129472.15	RAB2B	0.00475323	12.7831	6.09432e-06	0.233314	hsa-miR-10399-5p	ENSG00000177683.14	THAP5	trans	0.00231474	-2.75126	1.77023e-07	-0.268126
chr14_21460885_-	ENSG00000129472.15	RAB2B	0.00475323	12.7831	6.09432e-06	0.233314	hsa-miR-10399-5p	ENSG00000177853.14	ZNF518A	trans	0.00439048	-1.71133	1.10576e-06	-0.250746
chr14_21460885_-	ENSG00000129472.15	RAB2B	0.00475323	12.7831	6.09432e-06	0.233314	hsa-miR-10399-5p	ENSG00000177889.10	UBE2N	trans	0.000650442	-4.22666	5.68376e-08	-0.278315
chr14_21460885_-	ENSG00000129472.15	RAB2B	0.00475323	12.7831	6.09432e-06	0.233314	hsa-miR-10399-5p	ENSG00000177971.8	IMP3	trans	0.0459631	-1.97095	9.80331e-05	-0.201658
chr14_21460885_-	ENSG00000129472.15	RAB2B	0.00475323	12.7831	6.09432e-06	0.233314	hsa-miR-10399-5p	ENSG00000178177.16	LCORL	trans	0.0303035	-1.24388	2.23716e-05	-0.21907
chr14_21460885_-	ENSG00000129472.15	RAB2B	0.00475323	12.7831	6.09432e-06	0.233314	hsa-miR-10399-5p	ENSG00000178562.18	CD28	trans	0.00071757	-3.34475	1.94839e-07	-0.267247
chr14_21460885_-	ENSG00000129472.15	RAB2B	0.00475323	12.7831	6.09432e-06	0.233314	hsa-miR-10399-5p	ENSG00000179021.10	C3orf38	trans	0.00588038	-1.63201	1.39401e-06	-0.248455
chr14_21460885_-	ENSG00000129472.15	RAB2B	0.00475323	12.7831	6.09432e-06	0.233314	hsa-miR-10399-5p	ENSG00000179454.14	KLHL28	trans	0.00338629	-1.60013	5.74626e-07	-0.257101
chr14_21460885_-	ENSG00000129472.15	RAB2B	0.00475323	12.7831	6.09432e-06	0.233314	hsa-miR-10399-5p	ENSG00000180182.11	MED14	trans	0.0163919	-1.8925	1.6884e-05	-0.222231
chr14_21460885_-	ENSG00000129472.15	RAB2B	0.00475323	12.7831	6.09432e-06	0.233314	hsa-miR-10399-5p	ENSG00000180228.14	PRKRA	trans	0.00589176	-2.33544	7.37919e-07	-0.254692
chr14_21460885_-	ENSG00000129472.15	RAB2B	0.00475323	12.7831	6.09432e-06	0.233314	hsa-miR-10399-5p	ENSG00000180233.11	ZNRF2	trans	0.00779661	-2.2535	1.70605e-06	-0.246439
chr14_21460885_-	ENSG00000129472.15	RAB2B	0.00475323	12.7831	6.09432e-06	0.233314	hsa-miR-10399-5p	ENSG00000180357.9	ZNF609	trans	0.0216651	-1.93273	2.65028e-05	-0.217144
chr14_21460885_-	ENSG00000129472.15	RAB2B	0.00475323	12.7831	6.09432e-06	0.233314	hsa-miR-10399-5p	ENSG00000180376.17	CCDC66	trans	0.000315249	-3.45404	8.84013e-09	-0.294164
chr14_21460885_-	ENSG00000129472.15	RAB2B	0.00475323	12.7831	6.09432e-06	0.233314	hsa-miR-10399-5p	ENSG00000180398.13	MCFD2	trans	0.0199422	-1.45513	2.29133e-05	-0.218799
chr14_21460885_-	ENSG00000129472.15	RAB2B	0.00475323	12.7831	6.09432e-06	0.233314	hsa-miR-10399-5p	ENSG00000180817.12	PPA1	trans	0.0115409	-2.31004	1.23115e-05	-0.225726
chr14_21460885_-	ENSG00000129472.15	RAB2B	0.00475323	12.7831	6.09432e-06	0.233314	hsa-miR-10399-5p	ENSG00000180822.12	PSMG4	trans	0.00161999	-1.91559	7.20866e-08	-0.276218
chr14_21460885_-	ENSG00000129472.15	RAB2B	0.00475323	12.7831	6.09432e-06	0.233314	hsa-miR-10399-5p	ENSG00000180917.18	CMTR2	trans	0.00242405	-1.72643	1.87055e-07	-0.267621
chr14_21460885_-	ENSG00000129472.15	RAB2B	0.00475323	12.7831	6.09432e-06	0.233314	hsa-miR-10399-5p	ENSG00000181163.14	NPM1	trans	0.000417791	-23.2938	5.72534e-08	-0.278251
chr14_21460885_-	ENSG00000129472.15	RAB2B	0.00475323	12.7831	6.09432e-06	0.233314	hsa-miR-10399-5p	ENSG00000181722.17	ZBTB20	trans	0.00432715	-3.34936	2.05106e-06	-0.244586
chr14_21460885_-	ENSG00000129472.15	RAB2B	0.00475323	12.7831	6.09432e-06	0.233314	hsa-miR-10399-5p	ENSG00000181896.12	ZNF101	trans	0.00268195	-4.17154	6.43728e-07	-0.25601
chr14_21460885_-	ENSG00000129472.15	RAB2B	0.00475323	12.7831	6.09432e-06	0.233314	hsa-miR-10399-5p	ENSG00000181904.9	C5orf24	trans	0.0247019	-1.35902	3.43456e-05	-0.214164
chr14_21460885_-	ENSG00000129472.15	RAB2B	0.00475323	12.7831	6.09432e-06	0.233314	hsa-miR-10399-5p	ENSG00000182141.10	ZNF708	trans	0.00527252	-1.7606	1.18709e-06	-0.250046
chr14_21460885_-	ENSG00000129472.15	RAB2B	0.00475323	12.7831	6.09432e-06	0.233314	hsa-miR-10399-5p	ENSG00000182150.18	ERCC6L2	trans	0.00996229	-1.53654	5.8004e-06	-0.233838
chr14_21460885_-	ENSG00000129472.15	RAB2B	0.00475323	12.7831	6.09432e-06	0.233314	hsa-miR-10399-5p	ENSG00000182551.14	ADI1	trans	0.0203528	-1.49477	1.12489e-05	-0.226715
chr14_21460885_-	ENSG00000129472.15	RAB2B	0.00475323	12.7831	6.09432e-06	0.233314	hsa-miR-10399-5p	ENSG00000182903.16	ZNF721	trans	9.01086e-05	-2.4729	2.56038e-09	-0.304203
chr14_21460885_-	ENSG00000129472.15	RAB2B	0.00475323	12.7831	6.09432e-06	0.233314	hsa-miR-10399-5p	ENSG00000183530.14	PRR14L	trans	0.0499207	-2.59925	0.00015278	-0.196132
chr14_21460885_-	ENSG00000129472.15	RAB2B	0.00475323	12.7831	6.09432e-06	0.233314	hsa-miR-10399-5p	ENSG00000183808.11	RBM12B	trans	0.0145863	-2.51173	1.03562e-05	-0.227616
chr14_21460885_-	ENSG00000129472.15	RAB2B	0.00475323	12.7831	6.09432e-06	0.233314	hsa-miR-10399-5p	ENSG00000183813.7	CCR4	trans	0.023078	-1.81318	2.15686e-05	-0.219483
chr14_21460885_-	ENSG00000129472.15	RAB2B	0.00475323	12.7831	6.09432e-06	0.233314	hsa-miR-10399-5p	ENSG00000183826.18	BTBD9	trans	0.0258551	-1.95457	3.68688e-05	-0.213341
chr14_21460885_-	ENSG00000129472.15	RAB2B	0.00475323	12.7831	6.09432e-06	0.233314	hsa-miR-10399-5p	ENSG00000183918.17	SH2D1A	trans	0.00223462	-2.31101	2.80351e-07	-0.26388
chr14_21460885_-	ENSG00000129472.15	RAB2B	0.00475323	12.7831	6.09432e-06	0.233314	hsa-miR-10399-5p	ENSG00000183943.6	PRKX	trans	0.0323404	-1.64443	0.000138625	-0.197356
chr14_21460885_-	ENSG00000129472.15	RAB2B	0.00475323	12.7831	6.09432e-06	0.233314	hsa-miR-10399-5p	ENSG00000184203.8	PPP1R2	trans	0.000550388	-5.67017	6.20003e-08	-0.27755
chr14_21460885_-	ENSG00000129472.15	RAB2B	0.00475323	12.7831	6.09432e-06	0.233314	hsa-miR-10399-5p	ENSG00000184575.12	XPOT	trans	0.0400336	-1.32252	5.77095e-05	-0.208069
chr14_21460885_-	ENSG00000129472.15	RAB2B	0.00475323	12.7831	6.09432e-06	0.233314	hsa-miR-10399-5p	ENSG00000184613.11	NELL2	trans	0.0271062	-4.20696	0.000177439	-0.194234
chr14_21460885_-	ENSG00000129472.15	RAB2B	0.00475323	12.7831	6.09432e-06	0.233314	hsa-miR-10399-5p	ENSG00000184743.13	ATL3	trans	0.0135931	-1.43194	4.89535e-06	-0.235627
chr14_21460885_-	ENSG00000129472.15	RAB2B	0.00475323	12.7831	6.09432e-06	0.233314	hsa-miR-10399-5p	ENSG00000184787.19	UBE2G2	trans	0.00282893	-5.38949	6.35251e-07	-0.256138
chr14_21460885_-	ENSG00000129472.15	RAB2B	0.00475323	12.7831	6.09432e-06	0.233314	hsa-miR-10399-5p	ENSG00000184840.12	TMED9	trans	0.0426412	-2.5936	6.90515e-05	-0.20592
chr14_21460885_-	ENSG00000129472.15	RAB2B	0.00475323	12.7831	6.09432e-06	0.233314	hsa-miR-10399-5p	ENSG00000184939.16	ZFP90	trans	0.000300086	-2.35992	8.31318e-09	-0.294672
chr14_21460885_-	ENSG00000129472.15	RAB2B	0.00475323	12.7831	6.09432e-06	0.233314	hsa-miR-10399-5p	ENSG00000185009.13	AP3M1	trans	0.0105844	-1.90991	5.53089e-06	-0.234341
chr14_21460885_-	ENSG00000129472.15	RAB2B	0.00475323	12.7831	6.09432e-06	0.233314	hsa-miR-10399-5p	ENSG00000185088.14	RPS27L	trans	0.00653965	-1.92639	1.9053e-06	-0.24533
chr14_21460885_-	ENSG00000129472.15	RAB2B	0.00475323	12.7831	6.09432e-06	0.233314	hsa-miR-10399-5p	ENSG00000185127.6	C6orf120	trans	0.00174528	-1.49939	1.49009e-07	-0.269698
chr14_21460885_-	ENSG00000129472.15	RAB2B	0.00475323	12.7831	6.09432e-06	0.233314	hsa-miR-10399-5p	ENSG00000185129.8	PURA	trans	0.00656849	-1.58984	3.28769e-06	-0.23977
chr14_21460885_-	ENSG00000129472.15	RAB2B	0.00475323	12.7831	6.09432e-06	0.233314	hsa-miR-10399-5p	ENSG00000185344.15	ATP6V0A2	trans	0.0352483	-2.06595	4.96748e-05	-0.209848
chr14_21460885_-	ENSG00000129472.15	RAB2B	0.00475323	12.7831	6.09432e-06	0.233314	hsa-miR-10399-5p	ENSG00000185477.5	GPRIN3	trans	0.00221135	-1.55685	3.20067e-07	-0.262643
chr14_21460885_-	ENSG00000129472.15	RAB2B	0.00475323	12.7831	6.09432e-06	0.233314	hsa-miR-10399-5p	ENSG00000185651.15	UBE2L3	trans	0.0332264	-1.60081	4.80659e-05	-0.210237
chr14_21460885_-	ENSG00000129472.15	RAB2B	0.00475323	12.7831	6.09432e-06	0.233314	hsa-miR-10399-5p	ENSG00000185811.19	IKZF1	trans	0.0168613	-20.8951	1.67374e-05	-0.222329
chr14_21460885_-	ENSG00000129472.15	RAB2B	0.00475323	12.7831	6.09432e-06	0.233314	hsa-miR-10399-5p	ENSG00000185900.11	POMK	trans	0.0427295	-1.43277	5.19908e-05	-0.209309
chr14_21460885_-	ENSG00000129472.15	RAB2B	0.00475323	12.7831	6.09432e-06	0.233314	hsa-miR-10399-5p	ENSG00000185946.16	RNPC3	trans	0.00143738	-3.35973	1.78589e-07	-0.268046
chr14_21460885_-	ENSG00000129472.15	RAB2B	0.00475323	12.7831	6.09432e-06	0.233314	hsa-miR-10399-5p	ENSG00000186001.14	LRCH3	trans	0.0136318	-3.22629	1.09825e-05	-0.226976
chr14_21460885_-	ENSG00000129472.15	RAB2B	0.00475323	12.7831	6.09432e-06	0.233314	hsa-miR-10399-5p	ENSG00000186104.11	CYP2R1	trans	0.000780247	-1.67613	6.834e-08	-0.27669
chr14_21460885_-	ENSG00000129472.15	RAB2B	0.00475323	12.7831	6.09432e-06	0.233314	hsa-miR-10399-5p	ENSG00000186298.12	PPP1CC	trans	0.0202312	-8.19799	2.26424e-05	-0.218934
chr14_21460885_-	ENSG00000129472.15	RAB2B	0.00475323	12.7831	6.09432e-06	0.233314	hsa-miR-10399-5p	ENSG00000186468.13	RPS23	trans	0.000114556	-177.391	3.81918e-09	-0.301006
chr14_21460885_-	ENSG00000129472.15	RAB2B	0.00475323	12.7831	6.09432e-06	0.233314	hsa-miR-10399-5p	ENSG00000186812.13	ZNF397	trans	0.0261904	-2.98984	3.72744e-05	-0.213214
chr14_21460885_-	ENSG00000129472.15	RAB2B	0.00475323	12.7831	6.09432e-06	0.233314	hsa-miR-10399-5p	ENSG00000187109.15	NAP1L1	trans	7.27749e-05	-7.93123	1.37173e-09	-0.309118
chr14_21460885_-	ENSG00000129472.15	RAB2B	0.00475323	12.7831	6.09432e-06	0.233314	hsa-miR-10399-5p	ENSG00000187239.17	FNBP1	trans	0.0489689	-6.24932	0.000109798	-0.200261
chr14_21460885_-	ENSG00000129472.15	RAB2B	0.00475323	12.7831	6.09432e-06	0.233314	hsa-miR-10399-5p	ENSG00000187257.16	RSBN1L	trans	0.0418754	-2.44	5.57269e-05	-0.208485
chr14_21460885_-	ENSG00000129472.15	RAB2B	0.00475323	12.7831	6.09432e-06	0.233314	hsa-miR-10399-5p	ENSG00000188042.8	ARL4C	trans	0.0403858	-3.77796	5.85505e-05	-0.207897
chr14_21460885_-	ENSG00000129472.15	RAB2B	0.00475323	12.7831	6.09432e-06	0.233314	hsa-miR-10399-5p	ENSG00000188529.15	SRSF10	trans	0.000154345	-6.72615	7.76882e-09	-0.295229
chr14_21460885_-	ENSG00000129472.15	RAB2B	0.00475323	12.7831	6.09432e-06	0.233314	hsa-miR-10399-5p	ENSG00000188647.13	PTAR1	trans	0.00971264	-3.3405	4.34551e-06	-0.236875
chr14_21460885_-	ENSG00000129472.15	RAB2B	0.00475323	12.7831	6.09432e-06	0.233314	hsa-miR-10399-5p	ENSG00000188846.14	RPL14	trans	0.000379519	-59.5614	4.0407e-08	-0.281296
chr14_21460885_-	ENSG00000129472.15	RAB2B	0.00475323	12.7831	6.09432e-06	0.233314	hsa-miR-10399-5p	ENSG00000189091.13	SF3B3	trans	0.019168	-3.88353	1.94788e-05	-0.220631
chr14_21460885_-	ENSG00000129472.15	RAB2B	0.00475323	12.7831	6.09432e-06	0.233314	hsa-miR-10399-5p	ENSG00000189180.16	ZNF33A	trans	0.0405538	-5.56918	5.71267e-05	-0.20819
chr14_21460885_-	ENSG00000129472.15	RAB2B	0.00475323	12.7831	6.09432e-06	0.233314	hsa-miR-10399-5p	ENSG00000189403.15	HMGB1	trans	0.00180838	-17.7709	1.91479e-07	-0.267406
chr14_21460885_-	ENSG00000129472.15	RAB2B	0.00475323	12.7831	6.09432e-06	0.233314	hsa-miR-10399-5p	ENSG00000196262.15	PPIA	trans	1.04058e-05	-39.2839	6.76768e-11	-0.33163
chr14_21460885_-	ENSG00000129472.15	RAB2B	0.00475323	12.7831	6.09432e-06	0.233314	hsa-miR-10399-5p	ENSG00000196295.12	GARS1-DT	trans	0.0319645	-12.5824	3.39608e-05	-0.214294
chr14_21460885_-	ENSG00000129472.15	RAB2B	0.00475323	12.7831	6.09432e-06	0.233314	hsa-miR-10399-5p	ENSG00000196323.14	ZBTB44	trans	0.0420891	-2.04181	5.80111e-05	-0.208007
chr14_21460885_-	ENSG00000129472.15	RAB2B	0.00475323	12.7831	6.09432e-06	0.233314	hsa-miR-10399-5p	ENSG00000196470.12	SIAH1	trans	0.00775537	-1.8975	9.00872e-07	-0.252753
chr14_21460885_-	ENSG00000129472.15	RAB2B	0.00475323	12.7831	6.09432e-06	0.233314	hsa-miR-10399-5p	ENSG00000196504.19	PRPF40A	trans	0.0145289	-3.91496	1.27285e-05	-0.22536
chr14_21460885_-	ENSG00000129472.15	RAB2B	0.00475323	12.7831	6.09432e-06	0.233314	hsa-miR-10399-5p	ENSG00000196505.11	GDAP2	trans	0.0200971	-1.98319	1.53331e-05	-0.223303
chr14_21460885_-	ENSG00000129472.15	RAB2B	0.00475323	12.7831	6.09432e-06	0.233314	hsa-miR-10399-5p	ENSG00000196693.15	ZNF33B	trans	0.0353019	-2.00578	8.40713e-05	-0.203538
chr14_21460885_-	ENSG00000129472.15	RAB2B	0.00475323	12.7831	6.09432e-06	0.233314	hsa-miR-10399-5p	ENSG00000196776.17	CD47	trans	0.00155933	-7.9984	1.451e-07	-0.26994
chr14_21460885_-	ENSG00000129472.15	RAB2B	0.00475323	12.7831	6.09432e-06	0.233314	hsa-miR-10399-5p	ENSG00000196950.14	SLC39A10	trans	0.000255139	-3.69973	2.41084e-08	-0.285742
chr14_21460885_-	ENSG00000129472.15	RAB2B	0.00475323	12.7831	6.09432e-06	0.233314	hsa-miR-10399-5p	ENSG00000197217.13	ENTPD4	trans	0.0028996	-4.32627	4.24165e-07	-0.259992
chr14_21460885_-	ENSG00000129472.15	RAB2B	0.00475323	12.7831	6.09432e-06	0.233314	hsa-miR-10399-5p	ENSG00000197343.11	ZNF655	trans	0.00970179	-7.40053	4.04241e-06	-0.237629
chr14_21460885_-	ENSG00000129472.15	RAB2B	0.00475323	12.7831	6.09432e-06	0.233314	hsa-miR-10399-5p	ENSG00000197448.14	GSTK1	trans	0.0446981	-9.794	8.15078e-05	-0.203914
chr14_21460885_-	ENSG00000129472.15	RAB2B	0.00475323	12.7831	6.09432e-06	0.233314	hsa-miR-10399-5p	ENSG00000197563.11	PIGN	trans	0.0190796	-1.46397	8.98048e-06	-0.229162
chr14_21460885_-	ENSG00000129472.15	RAB2B	0.00475323	12.7831	6.09432e-06	0.233314	hsa-miR-10399-5p	ENSG00000197608.11	ZNF841	trans	0.0118171	-1.43676	1.222e-05	-0.225808
chr14_21460885_-	ENSG00000129472.15	RAB2B	0.00475323	12.7831	6.09432e-06	0.233314	hsa-miR-10399-5p	ENSG00000197714.9	ZNF460	trans	0.0276096	-3.13821	5.83051e-05	-0.207947
chr14_21460885_-	ENSG00000129472.15	RAB2B	0.00475323	12.7831	6.09432e-06	0.233314	hsa-miR-10399-5p	ENSG00000197756.10	RPL37A	trans	0.00762537	-219.199	7.11219e-06	-0.231669
chr14_21460885_-	ENSG00000129472.15	RAB2B	0.00475323	12.7831	6.09432e-06	0.233314	hsa-miR-10399-5p	ENSG00000197837.3	H4-16	trans	0.00479685	-22.3928	2.08055e-06	-0.244442
chr14_21460885_-	ENSG00000129472.15	RAB2B	0.00475323	12.7831	6.09432e-06	0.233314	hsa-miR-10399-5p	ENSG00000197857.14	ZNF44	trans	0.00015894	-1.84037	3.88442e-09	-0.300869
chr14_21460885_-	ENSG00000129472.15	RAB2B	0.00475323	12.7831	6.09432e-06	0.233314	hsa-miR-10399-5p	ENSG00000197969.14	VPS13A	trans	0.0212116	-1.75967	2.43296e-05	-0.218118
chr14_21460885_-	ENSG00000129472.15	RAB2B	0.00475323	12.7831	6.09432e-06	0.233314	hsa-miR-10399-5p	ENSG00000198015.14	MRPL42	trans	0.0110372	-2.44921	6.65354e-06	-0.232381
chr14_21460885_-	ENSG00000129472.15	RAB2B	0.00475323	12.7831	6.09432e-06	0.233314	hsa-miR-10399-5p	ENSG00000198081.11	ZBTB14	trans	0.0181015	-1.30691	9.92032e-06	-0.228084
chr14_21460885_-	ENSG00000129472.15	RAB2B	0.00475323	12.7831	6.09432e-06	0.233314	hsa-miR-10399-5p	ENSG00000198093.11	ZNF649	trans	2.30755e-05	-2.14198	2.66636e-10	-0.321603
chr14_21460885_-	ENSG00000129472.15	RAB2B	0.00475323	12.7831	6.09432e-06	0.233314	hsa-miR-10399-5p	ENSG00000198131.14	ZNF544	trans	0.0292981	-1.89915	6.0658e-05	-0.207475
chr14_21460885_-	ENSG00000129472.15	RAB2B	0.00475323	12.7831	6.09432e-06	0.233314	hsa-miR-10399-5p	ENSG00000198160.15	MIER1	trans	0.00729374	-3.71938	1.77661e-06	-0.246033
chr14_21460885_-	ENSG00000129472.15	RAB2B	0.00475323	12.7831	6.09432e-06	0.233314	hsa-miR-10399-5p	ENSG00000198265.12	HELZ	trans	0.0274503	-5.86045	3.74423e-05	-0.213162
chr14_21460885_-	ENSG00000129472.15	RAB2B	0.00475323	12.7831	6.09432e-06	0.233314	hsa-miR-10399-5p	ENSG00000198393.8	ZNF26	trans	0.00637832	-1.46874	2.07649e-06	-0.244462
chr14_21460885_-	ENSG00000129472.15	RAB2B	0.00475323	12.7831	6.09432e-06	0.233314	hsa-miR-10399-5p	ENSG00000198399.15	ITSN2	trans	0.0212256	-7.42841	1.87158e-05	-0.22108
chr14_21460885_-	ENSG00000129472.15	RAB2B	0.00475323	12.7831	6.09432e-06	0.233314	hsa-miR-10399-5p	ENSG00000198466.12	ZNF587	trans	0.037995	-2.79004	7.67781e-05	-0.20464
chr14_21460885_-	ENSG00000129472.15	RAB2B	0.00475323	12.7831	6.09432e-06	0.233314	hsa-miR-10399-5p	ENSG00000198482.14	ZNF808	trans	0.0130967	-2.82221	5.76998e-06	-0.233894
chr14_21460885_-	ENSG00000129472.15	RAB2B	0.00475323	12.7831	6.09432e-06	0.233314	hsa-miR-10399-5p	ENSG00000198589.14	LRBA	trans	0.00896431	-3.46397	3.74432e-06	-0.238425
chr14_21460885_-	ENSG00000129472.15	RAB2B	0.00475323	12.7831	6.09432e-06	0.233314	hsa-miR-10399-5p	ENSG00000198625.13	MDM4	trans	0.0180015	-10.4491	1.93149e-05	-0.220726
chr14_21460885_-	ENSG00000129472.15	RAB2B	0.00475323	12.7831	6.09432e-06	0.233314	hsa-miR-10399-5p	ENSG00000198642.7	KLHL9	trans	0.00112413	-1.65249	1.19398e-07	-0.271706
chr14_21460885_-	ENSG00000129472.15	RAB2B	0.00475323	12.7831	6.09432e-06	0.233314	hsa-miR-10399-5p	ENSG00000198668.13	CALM1	trans	0.0188869	-14.1691	1.51968e-05	-0.223402
chr14_21460885_-	ENSG00000129472.15	RAB2B	0.00475323	12.7831	6.09432e-06	0.233314	hsa-miR-10399-5p	ENSG00000198677.12	TTC37	trans	0.00643729	-3.2719	1.58209e-06	-0.247194
chr14_21460885_-	ENSG00000129472.15	RAB2B	0.00475323	12.7831	6.09432e-06	0.233314	hsa-miR-10399-5p	ENSG00000198690.10	FAN1	trans	0.0276448	-1.62092	5.68102e-05	-0.208256
chr14_21460885_-	ENSG00000129472.15	RAB2B	0.00475323	12.7831	6.09432e-06	0.233314	hsa-miR-10399-5p	ENSG00000198791.12	CNOT7	trans	0.00129178	-4.49572	6.42615e-08	-0.277234
chr14_21460885_-	ENSG00000129472.15	RAB2B	0.00475323	12.7831	6.09432e-06	0.233314	hsa-miR-10399-5p	ENSG00000198839.10	ZNF277	trans	0.0088439	-1.30327	4.40502e-06	-0.236733
chr14_21460885_-	ENSG00000129472.15	RAB2B	0.00475323	12.7831	6.09432e-06	0.233314	hsa-miR-10399-5p	ENSG00000198843.13	SELENOT	trans	0.00308601	-4.65936	5.59526e-07	-0.257356
chr14_21460885_-	ENSG00000129472.15	RAB2B	0.00475323	12.7831	6.09432e-06	0.233314	hsa-miR-10399-5p	ENSG00000198860.13	TSEN15	trans	0.0187451	-1.80018	4.51061e-06	-0.236485
chr14_21460885_-	ENSG00000129472.15	RAB2B	0.00475323	12.7831	6.09432e-06	0.233314	hsa-miR-10399-5p	ENSG00000198898.14	CAPZA2	trans	0.0199505	-11.5821	1.65331e-05	-0.222465
chr14_21460885_-	ENSG00000129472.15	RAB2B	0.00475323	12.7831	6.09432e-06	0.233314	hsa-miR-10399-5p	ENSG00000198961.10	PJA2	trans	0.0420909	-5.45187	7.72502e-05	-0.204565
chr14_21460885_-	ENSG00000129472.15	RAB2B	0.00475323	12.7831	6.09432e-06	0.233314	hsa-miR-10399-5p	ENSG00000203667.10	COX20	trans	2.50859e-05	-3.08068	1.47956e-10	-0.325955
chr14_21460885_-	ENSG00000129472.15	RAB2B	0.00475323	12.7831	6.09432e-06	0.233314	hsa-miR-10399-5p	ENSG00000203865.11	ATP1A1-AS1	trans	0.01109	-2.13711	2.36402e-06	-0.243147
chr14_21460885_-	ENSG00000129472.15	RAB2B	0.00475323	12.7831	6.09432e-06	0.233314	hsa-miR-10399-5p	ENSG00000203875.13	SNHG5	trans	0.0175662	-12.0929	1.78512e-05	-0.221609
chr14_21460885_-	ENSG00000129472.15	RAB2B	0.00475323	12.7831	6.09432e-06	0.233314	hsa-miR-10399-5p	ENSG00000204406.14	MBD5	trans	0.0233049	-3.90569	1.93133e-05	-0.221022
chr14_21460885_-	ENSG00000129472.15	RAB2B	0.00475323	12.7831	6.09432e-06	0.233314	hsa-miR-10399-5p	ENSG00000204514.10	ZNF814	trans	0.0222242	-2.75582	2.7977e-05	-0.216815
chr14_21460885_-	ENSG00000129472.15	RAB2B	0.00475323	12.7831	6.09432e-06	0.233314	hsa-miR-10399-5p	ENSG00000204568.12	MRPS18B	trans	0.0342504	-1.53728	9.12049e-05	-0.202815
chr14_21460885_-	ENSG00000129472.15	RAB2B	0.00475323	12.7831	6.09432e-06	0.233314	hsa-miR-10399-5p	ENSG00000204713.11	TRIM27	trans	0.0331772	-4.35832	4.36201e-05	-0.211661
chr14_21460885_-	ENSG00000129472.15	RAB2B	0.00475323	12.7831	6.09432e-06	0.233314	hsa-miR-10399-5p	ENSG00000204842.18	ATXN2	trans	0.0269716	-2.69906	2.69297e-05	-0.217251
chr14_21460885_-	ENSG00000129472.15	RAB2B	0.00475323	12.7831	6.09432e-06	0.233314	hsa-miR-10399-5p	ENSG00000205268.11	PDE7A	trans	0.00201976	-9.01697	1.22567e-06	-0.250062
chr14_21460885_-	ENSG00000129472.15	RAB2B	0.00475323	12.7831	6.09432e-06	0.233314	hsa-miR-10399-5p	ENSG00000205302.7	SNX2	trans	0.00579893	-7.8865	1.23498e-06	-0.249987
chr14_21460885_-	ENSG00000129472.15	RAB2B	0.00475323	12.7831	6.09432e-06	0.233314	hsa-miR-10399-5p	ENSG00000205339.10	IPO7	trans	0.0330283	-1.6315	8.81979e-05	-0.203226
chr14_21460885_-	ENSG00000129472.15	RAB2B	0.00475323	12.7831	6.09432e-06	0.233314	hsa-miR-10399-5p	ENSG00000205758.12	CRYZL1	trans	0.0029888	-2.08454	3.83757e-07	-0.261283
chr14_21460885_-	ENSG00000129472.15	RAB2B	0.00475323	12.7831	6.09432e-06	0.233314	hsa-miR-10399-5p	ENSG00000205885.7	C1RL-AS1	trans	0.0276647	-2.18191	2.972e-05	-0.216121
chr14_21460885_-	ENSG00000129472.15	RAB2B	0.00475323	12.7831	6.09432e-06	0.233314	hsa-miR-10399-5p	ENSG00000206573.9	THUMPD3-AS1	trans	0.00090125	-8.00086	5.61551e-08	-0.278788
chr14_21460885_-	ENSG00000129472.15	RAB2B	0.00475323	12.7831	6.09432e-06	0.233314	hsa-miR-10399-5p	ENSG00000213020.10	ZNF611	trans	0.000480241	-2.35173	2.02337e-08	-0.28761
chr14_21460885_-	ENSG00000129472.15	RAB2B	0.00475323	12.7831	6.09432e-06	0.233314	hsa-miR-10399-5p	ENSG00000213203.3	GIMAP1	trans	0.00609097	-3.9839	3.0713e-06	-0.240791
chr14_21460885_-	ENSG00000129472.15	RAB2B	0.00475323	12.7831	6.09432e-06	0.233314	hsa-miR-10399-5p	ENSG00000213341.11	CHUK	trans	0.0155238	-1.59048	9.6331e-06	-0.228708
chr14_21460885_-	ENSG00000129472.15	RAB2B	0.00475323	12.7831	6.09432e-06	0.233314	hsa-miR-10399-5p	ENSG00000213380.16	COG8	trans	0.0482527	-1.86608	5.52604e-05	-0.208865
chr14_21460885_-	ENSG00000129472.15	RAB2B	0.00475323	12.7831	6.09432e-06	0.233314	hsa-miR-10399-5p	ENSG00000213619.11	NDUFS3	trans	0.00784087	-1.87815	3.16268e-06	-0.240489
chr14_21460885_-	ENSG00000129472.15	RAB2B	0.00475323	12.7831	6.09432e-06	0.233314	hsa-miR-10399-5p	ENSG00000213741.11	RPS29	trans	0.0010033	-566.684	2.40003e-07	-0.265674
chr14_21460885_-	ENSG00000129472.15	RAB2B	0.00475323	12.7831	6.09432e-06	0.233314	hsa-miR-10399-5p	ENSG00000213918.10	DNASE1	trans	0.0285893	-2.98345	3.94048e-05	-0.212852
chr14_21460885_-	ENSG00000129472.15	RAB2B	0.00475323	12.7831	6.09432e-06	0.233314	hsa-miR-10399-5p	ENSG00000214013.9	GANC	trans	0.0287795	-2.61538	4.18381e-05	-0.212151
chr14_21460885_-	ENSG00000129472.15	RAB2B	0.00475323	12.7831	6.09432e-06	0.233314	hsa-miR-10399-5p	ENSG00000214046.9	SMIM7	trans	0.00359605	-4.54409	6.22189e-07	-0.256677
chr14_21460885_-	ENSG00000129472.15	RAB2B	0.00475323	12.7831	6.09432e-06	0.233314	hsa-miR-10399-5p	ENSG00000214900.11	LINC01588	trans	0.0260216	-2.03606	2.839e-05	-0.216646
chr14_21460885_-	ENSG00000129472.15	RAB2B	0.00475323	12.7831	6.09432e-06	0.233314	hsa-miR-10399-5p	ENSG00000215068.8	AC025171.2	trans	0.00473418	-3.53612	1.18086e-06	-0.25043
chr14_21460885_-	ENSG00000129472.15	RAB2B	0.00475323	12.7831	6.09432e-06	0.233314	hsa-miR-10399-5p	ENSG00000215252.11	GOLGA8B	trans	0.00181229	-6.9686	9.29684e-07	-0.252781
chr14_21460885_-	ENSG00000129472.15	RAB2B	0.00475323	12.7831	6.09432e-06	0.233314	hsa-miR-10399-5p	ENSG00000221914.11	PPP2R2A	trans	0.0129591	-2.7793	6.57174e-06	-0.232822
chr14_21460885_-	ENSG00000129472.15	RAB2B	0.00475323	12.7831	6.09432e-06	0.233314	hsa-miR-10399-5p	ENSG00000224078.15	SNHG14	trans	0.00234138	-5.87142	6.36339e-08	-0.277686
chr14_21460885_-	ENSG00000129472.15	RAB2B	0.00475323	12.7831	6.09432e-06	0.233314	hsa-miR-10399-5p	ENSG00000224660.2	SH3BP5-AS1	trans	0.0105339	-2.27923	3.94456e-06	-0.2382
chr14_21460885_-	ENSG00000129472.15	RAB2B	0.00475323	12.7831	6.09432e-06	0.233314	hsa-miR-10399-5p	ENSG00000225484.7	NUTM2B-AS1	trans	0.0465836	-3.13658	6.13812e-05	-0.207611
chr14_21460885_-	ENSG00000129472.15	RAB2B	0.00475323	12.7831	6.09432e-06	0.233314	hsa-miR-10399-5p	ENSG00000225733.6	FGD5-AS1	trans	0.0166836	-3.6046	9.53759e-06	-0.228816
chr14_21460885_-	ENSG00000129472.15	RAB2B	0.00475323	12.7831	6.09432e-06	0.233314	hsa-miR-10399-5p	ENSG00000227345.8	PARG	trans	0.000396884	-2.4435	1.57718e-08	-0.289718
chr14_21460885_-	ENSG00000129472.15	RAB2B	0.00475323	12.7831	6.09432e-06	0.233314	hsa-miR-10399-5p	ENSG00000228956.8	SATB1-AS1	trans	0.00647897	-3.45197	2.57724e-06	-0.242913
chr14_21460885_-	ENSG00000129472.15	RAB2B	0.00475323	12.7831	6.09432e-06	0.233314	hsa-miR-10399-5p	ENSG00000229152.2	ANKRD10-IT1	trans	0.0354003	-1.43873	3.98365e-05	-0.21301
chr14_21460885_-	ENSG00000129472.15	RAB2B	0.00475323	12.7831	6.09432e-06	0.233314	hsa-miR-10399-5p	ENSG00000229619.4	MBNL1-AS1	trans	0.0171647	-2.836	1.33352e-05	-0.225449
chr14_21460885_-	ENSG00000129472.15	RAB2B	0.00475323	12.7831	6.09432e-06	0.233314	hsa-miR-10399-5p	ENSG00000230124.8	ACBD6	trans	0.00590771	-2.97932	1.1085e-06	-0.251388
chr14_21460885_-	ENSG00000129472.15	RAB2B	0.00475323	12.7831	6.09432e-06	0.233314	hsa-miR-10399-5p	ENSG00000230606.11	AC092683.1	trans	0.011679	-2.54022	4.66852e-07	-0.25977
chr14_21460885_-	ENSG00000129472.15	RAB2B	0.00475323	12.7831	6.09432e-06	0.233314	hsa-miR-10399-5p	ENSG00000231074.9	HCG18	trans	0.0105022	-5.04391	7.38884e-06	-0.231879
chr14_21460885_-	ENSG00000129472.15	RAB2B	0.00475323	12.7831	6.09432e-06	0.233314	hsa-miR-10399-5p	ENSG00000231329.8	AL031772.1	trans	0.00842048	-2.52536	3.57807e-06	-0.239533
chr14_21460885_-	ENSG00000129472.15	RAB2B	0.00475323	12.7831	6.09432e-06	0.233314	hsa-miR-10399-5p	ENSG00000232931.6	LINC00342	trans	0.0139289	-3.19604	6.29496e-06	-0.233592
chr14_21460885_-	ENSG00000129472.15	RAB2B	0.00475323	12.7831	6.09432e-06	0.233314	hsa-miR-10399-5p	ENSG00000233016.7	SNHG7	trans	0.0015935	-2.64995	3.79483e-07	-0.261735
chr14_21460885_-	ENSG00000129472.15	RAB2B	0.00475323	12.7831	6.09432e-06	0.233314	hsa-miR-10399-5p	ENSG00000234545.8	FAM133B	trans	0.0443766	-1.70422	5.11204e-05	-0.210072
chr14_21460885_-	ENSG00000129472.15	RAB2B	0.00475323	12.7831	6.09432e-06	0.233314	hsa-miR-10399-5p	ENSG00000237943.7	PRKCQ-AS1	trans	0.00243156	-7.96926	2.49329e-06	-0.243252
chr14_21460885_-	ENSG00000129472.15	RAB2B	0.00475323	12.7831	6.09432e-06	0.233314	hsa-miR-10399-5p	ENSG00000237945.7	LINC00649	trans	0.000753113	-3.09566	1.39584e-07	-0.271007
chr14_21460885_-	ENSG00000129472.15	RAB2B	0.00475323	12.7831	6.09432e-06	0.233314	hsa-miR-10399-5p	ENSG00000239306.5	RBM14	trans	0.0390046	-5.97687	9.76157e-05	-0.202253
chr14_21460885_-	ENSG00000129472.15	RAB2B	0.00475323	12.7831	6.09432e-06	0.233314	hsa-miR-10399-5p	ENSG00000239900.13	ADSL	trans	0.0120962	-2.53364	5.24775e-06	-0.235523
chr14_21460885_-	ENSG00000129472.15	RAB2B	0.00475323	12.7831	6.09432e-06	0.233314	hsa-miR-10399-5p	ENSG00000240230.6	COX19	trans	0.0122886	-2.01049	6.85334e-06	-0.232685
chr14_21460885_-	ENSG00000129472.15	RAB2B	0.00475323	12.7831	6.09432e-06	0.233314	hsa-miR-10399-5p	ENSG00000244462.8	RBM12	trans	0.0022184	-2.8602	2.96153e-07	-0.264067
chr14_21460885_-	ENSG00000129472.15	RAB2B	0.00475323	12.7831	6.09432e-06	0.233314	hsa-miR-10399-5p	ENSG00000244754.9	N4BP2L2	trans	0.00139121	-16.2793	8.76362e-08	-0.275206
chr14_21460885_-	ENSG00000129472.15	RAB2B	0.00475323	12.7831	6.09432e-06	0.233314	hsa-miR-10399-5p	ENSG00000244879.8	GABPB1-AS1	trans	0.0012741	-2.21901	1.24098e-07	-0.272074
chr14_21460885_-	ENSG00000129472.15	RAB2B	0.00475323	12.7831	6.09432e-06	0.233314	hsa-miR-10399-5p	ENSG00000245849.8	RAD51-AS1	trans	0.00664967	-2.40351	2.16643e-06	-0.244683
chr14_21460885_-	ENSG00000129472.15	RAB2B	0.00475323	12.7831	6.09432e-06	0.233314	hsa-miR-10399-5p	ENSG00000245937.8	LINC01184	trans	0.00627661	-2.40935	4.9571e-07	-0.259198
chr14_21460885_-	ENSG00000129472.15	RAB2B	0.00475323	12.7831	6.09432e-06	0.233314	hsa-miR-10399-5p	ENSG00000246067.8	RAB30-DT	trans	0.00605383	-5.3103	1.90741e-06	-0.245972
chr14_21460885_-	ENSG00000129472.15	RAB2B	0.00475323	12.7831	6.09432e-06	0.233314	hsa-miR-10399-5p	ENSG00000247556.6	OIP5-AS1	trans	0.00206316	-4.5843	3.19864e-07	-0.263345
chr14_21460885_-	ENSG00000129472.15	RAB2B	0.00475323	12.7831	6.09432e-06	0.233314	hsa-miR-10399-5p	ENSG00000247774.7	PCED1B-AS1	trans	0.00134924	-9.45525	2.35493e-07	-0.266202
chr14_21460885_-	ENSG00000129472.15	RAB2B	0.00475323	12.7831	6.09432e-06	0.233314	hsa-miR-10399-5p	ENSG00000247828.8	TMEM161B-AS1	trans	0.004556	-3.30061	4.70406e-07	-0.259697
chr14_21460885_-	ENSG00000129472.15	RAB2B	0.00475323	12.7831	6.09432e-06	0.233314	hsa-miR-10399-5p	ENSG00000249592.6	AC139887.2	trans	0.0160559	-2.99754	1.51694e-05	-0.224021
chr14_21460885_-	ENSG00000129472.15	RAB2B	0.00475323	12.7831	6.09432e-06	0.233314	hsa-miR-10399-5p	ENSG00000249859.12	PVT1	trans	0.044696	-3.99817	2.76296e-05	-0.217249
chr14_21460885_-	ENSG00000129472.15	RAB2B	0.00475323	12.7831	6.09432e-06	0.233314	hsa-miR-10399-5p	ENSG00000251562.8	MALAT1	trans	0.00585215	-1232.9	1.51327e-06	-0.248297
chr14_21460885_-	ENSG00000129472.15	RAB2B	0.00475323	12.7831	6.09432e-06	0.233314	hsa-miR-10399-5p	ENSG00000253352.10	TUG1	trans	0.00288195	-6.99435	4.05944e-07	-0.261098
chr14_21460885_-	ENSG00000129472.15	RAB2B	0.00475323	12.7831	6.09432e-06	0.233314	hsa-miR-10399-5p	ENSG00000255529.9	POLR2M	trans	0.00616449	-6.11416	2.06133e-06	-0.245515
chr14_21460885_-	ENSG00000129472.15	RAB2B	0.00475323	12.7831	6.09432e-06	0.233314	hsa-miR-10399-5p	ENSG00000256053.9	COA8	trans	0.00530565	-1.91529	1.32425e-06	-0.24996
chr14_21460885_-	ENSG00000129472.15	RAB2B	0.00475323	12.7831	6.09432e-06	0.233314	hsa-miR-10399-5p	ENSG00000256683.7	ZNF350	trans	0.00192579	-2.08113	9.10562e-08	-0.275227
chr14_21460885_-	ENSG00000129472.15	RAB2B	0.00475323	12.7831	6.09432e-06	0.233314	hsa-miR-10399-5p	ENSG00000257218.6	GATC	trans	0.0118798	-1.35827	1.07238e-05	-0.22815
chr14_21460885_-	ENSG00000129472.15	RAB2B	0.00475323	12.7831	6.09432e-06	0.233314	hsa-miR-10399-5p	ENSG00000257621.8	PSMA3-AS1	trans	0.00810135	-13.0117	2.67797e-06	-0.242845
chr14_21460885_-	ENSG00000129472.15	RAB2B	0.00475323	12.7831	6.09432e-06	0.233314	hsa-miR-10399-5p	ENSG00000258289.8	CHURC1	trans	4.82861e-05	-6.6049	8.31999e-10	-0.314218
chr14_21460885_-	ENSG00000129472.15	RAB2B	0.00475323	12.7831	6.09432e-06	0.233314	hsa-miR-10399-5p	ENSG00000258890.7	CEP95	trans	0.00281394	-2.65581	7.30719e-07	-0.255804
chr14_21460885_-	ENSG00000129472.15	RAB2B	0.00475323	12.7831	6.09432e-06	0.233314	hsa-miR-10399-5p	ENSG00000259834.1	AL365361.1	trans	0.0122641	-1.865	1.6584e-05	-0.223327
chr14_21460885_-	ENSG00000129472.15	RAB2B	0.00475323	12.7831	6.09432e-06	0.233314	hsa-miR-10399-5p	ENSG00000259972.3	AC009120.2	trans	0.0341159	-1.90371	1.79294e-05	-0.222452
chr14_21460885_-	ENSG00000129472.15	RAB2B	0.00475323	12.7831	6.09432e-06	0.233314	hsa-miR-10399-5p	ENSG00000260565.7	ERVK13-1	trans	0.0187055	-2.74783	1.14096e-05	-0.227471
chr14_21460885_-	ENSG00000129472.15	RAB2B	0.00475323	12.7831	6.09432e-06	0.233314	hsa-miR-10399-5p	ENSG00000261824.7	LINC00662	trans	0.0102158	-2.17802	2.51455e-08	-0.286511
chr14_21460885_-	ENSG00000129472.15	RAB2B	0.00475323	12.7831	6.09432e-06	0.233314	hsa-miR-10399-5p	ENSG00000263753.8	LINC00667	trans	0.0316471	-1.40579	2.63044e-05	-0.218105
chr14_21460885_-	ENSG00000129472.15	RAB2B	0.00475323	12.7831	6.09432e-06	0.233314	hsa-miR-10399-5p	ENSG00000265354.4	TIMM23	trans	0.0415333	-1.37967	3.64749e-05	-0.214327
chr14_21460885_-	ENSG00000129472.15	RAB2B	0.00475323	12.7831	6.09432e-06	0.233314	hsa-miR-10399-5p	ENSG00000266472.6	MRPS21	trans	1.88954e-05	-1.93389	1.78879e-10	-0.325827
chr14_21460885_-	ENSG00000129472.15	RAB2B	0.00475323	12.7831	6.09432e-06	0.233314	hsa-miR-10399-5p	ENSG00000268027.5	AC243960.1	trans	2.31058e-06	-4.4681	2.30579e-11	-0.340573
chr14_21460885_-	ENSG00000129472.15	RAB2B	0.00475323	12.7831	6.09432e-06	0.233314	hsa-miR-10399-5p	ENSG00000268362.6	AC092279.1	trans	0.0201466	-3.92698	1.90115e-05	-0.221793
chr14_21460885_-	ENSG00000129472.15	RAB2B	0.00475323	12.7831	6.09432e-06	0.233314	hsa-miR-10399-5p	ENSG00000269343.9	ZNF587B	trans	0.0399842	-1.33553	0.000114793	-0.200518
chr14_21460885_-	ENSG00000129472.15	RAB2B	0.00475323	12.7831	6.09432e-06	0.233314	hsa-miR-10399-5p	ENSG00000272758.6	AC083798.2	trans	0.0147868	-2.13821	1.24465e-05	-0.226514
chr14_21460885_-	ENSG00000129472.15	RAB2B	0.00475323	12.7831	6.09432e-06	0.233314	hsa-miR-10399-5p	ENSG00000272918.1	AC005070.3	trans	0.0336448	-1.655	5.05566e-05	-0.210486
chr14_21460885_-	ENSG00000129472.15	RAB2B	0.00475323	12.7831	6.09432e-06	0.233314	hsa-miR-10399-5p	ENSG00000275052.5	PPP4R3B	trans	0.0186484	-3.55862	1.3935e-05	-0.225265
chr14_21460885_-	ENSG00000129472.15	RAB2B	0.00475323	12.7831	6.09432e-06	0.233314	hsa-miR-10399-5p	ENSG00000275066.5	SYNRG	trans	0.0322432	-4.16025	4.30659e-05	-0.212382
chr14_21460885_-	ENSG00000129472.15	RAB2B	0.00475323	12.7831	6.09432e-06	0.233314	hsa-miR-10399-5p	ENSG00000281649.2	EBLN3P	trans	0.00411217	-3.16574	9.94151e-07	-0.252796
chr14_21460885_-	ENSG00000129472.15	RAB2B	0.00475323	12.7831	6.09432e-06	0.233314	hsa-miR-3117-3p	ENSG00000005020.13	SKAP2	trans	0.0331615	-4.41559	3.96718e-05	-0.212205
chr14_21460885_-	ENSG00000129472.15	RAB2B	0.00475323	12.7831	6.09432e-06	0.233314	hsa-miR-3117-3p	ENSG00000005700.15	IBTK	trans	0.00932618	-1.21136	4.75548e-06	-0.235618
chr14_21460885_-	ENSG00000129472.15	RAB2B	0.00475323	12.7831	6.09432e-06	0.233314	hsa-miR-3117-3p	ENSG00000009413.16	REV3L	trans	0.0150234	-1.94276	1.25413e-05	-0.225223
chr14_21460885_-	ENSG00000129472.15	RAB2B	0.00475323	12.7831	6.09432e-06	0.233314	hsa-miR-3117-3p	ENSG00000011275.19	RNF216	trans	0.0104354	-2.07589	6.50504e-06	-0.232312
chr14_21460885_-	ENSG00000129472.15	RAB2B	0.00475323	12.7831	6.09432e-06	0.233314	hsa-miR-3117-3p	ENSG00000011295.16	TTC19	trans	0.00222584	-3.88236	1.7153e-07	-0.268062
chr14_21460885_-	ENSG00000129472.15	RAB2B	0.00475323	12.7831	6.09432e-06	0.233314	hsa-miR-3117-3p	ENSG00000011523.14	CEP68	trans	0.0247693	-1.53889	2.23185e-05	-0.218805
chr14_21460885_-	ENSG00000129472.15	RAB2B	0.00475323	12.7831	6.09432e-06	0.233314	hsa-miR-3117-3p	ENSG00000014824.14	SLC30A9	trans	0.00178228	-2.19234	1.37909e-07	-0.270046
chr14_21460885_-	ENSG00000129472.15	RAB2B	0.00475323	12.7831	6.09432e-06	0.233314	hsa-miR-3117-3p	ENSG00000015171.20	ZMYND11	trans	0.0151575	-1.31826	1.14735e-05	-0.226197
chr14_21460885_-	ENSG00000129472.15	RAB2B	0.00475323	12.7831	6.09432e-06	0.233314	hsa-miR-3117-3p	ENSG00000015676.18	NUDCD3	trans	0.030721	-2.76718	6.00635e-05	-0.207315
chr14_21460885_-	ENSG00000129472.15	RAB2B	0.00475323	12.7831	6.09432e-06	0.233314	hsa-miR-3117-3p	ENSG00000018510.17	AGPS	trans	0.0370262	-1.24954	1.65383e-05	-0.222166
chr14_21460885_-	ENSG00000129472.15	RAB2B	0.00475323	12.7831	6.09432e-06	0.233314	hsa-miR-3117-3p	ENSG00000021776.11	AQR	trans	0.021342	-1.49109	1.9876e-05	-0.220111
chr14_21460885_-	ENSG00000129472.15	RAB2B	0.00475323	12.7831	6.09432e-06	0.233314	hsa-miR-3117-3p	ENSG00000028203.18	VEZT	trans	0.00761234	-2.27943	1.45506e-06	-0.247701
chr14_21460885_-	ENSG00000129472.15	RAB2B	0.00475323	12.7831	6.09432e-06	0.233314	hsa-miR-3117-3p	ENSG00000029363.17	BCLAF1	trans	0.00595601	-12.0168	2.03746e-06	-0.24433
chr14_21460885_-	ENSG00000129472.15	RAB2B	0.00475323	12.7831	6.09432e-06	0.233314	hsa-miR-3117-3p	ENSG00000032219.19	ARID4A	trans	0.00756464	-3.91817	1.68662e-06	-0.246228
chr14_21460885_-	ENSG00000129472.15	RAB2B	0.00475323	12.7831	6.09432e-06	0.233314	hsa-miR-3117-3p	ENSG00000033800.14	PIAS1	trans	0.0114553	-7.64093	4.844e-06	-0.235425
chr14_21460885_-	ENSG00000129472.15	RAB2B	0.00475323	12.7831	6.09432e-06	0.233314	hsa-miR-3117-3p	ENSG00000033867.16	SLC4A7	trans	0.000326593	-2.97724	3.09438e-08	-0.283232
chr14_21460885_-	ENSG00000129472.15	RAB2B	0.00475323	12.7831	6.09432e-06	0.233314	hsa-miR-3117-3p	ENSG00000039123.16	MTREX	trans	0.0252443	-3.36537	1.80214e-05	-0.221208
chr14_21460885_-	ENSG00000129472.15	RAB2B	0.00475323	12.7831	6.09432e-06	0.233314	hsa-miR-3117-3p	ENSG00000039319.17	ZFYVE16	trans	0.0410928	-4.10904	4.95966e-05	-0.209587
chr14_21460885_-	ENSG00000129472.15	RAB2B	0.00475323	12.7831	6.09432e-06	0.233314	hsa-miR-3117-3p	ENSG00000041357.16	PSMA4	trans	0.0368539	-8.01928	3.69329e-05	-0.213037
chr14_21460885_-	ENSG00000129472.15	RAB2B	0.00475323	12.7831	6.09432e-06	0.233314	hsa-miR-3117-3p	ENSG00000042429.12	MED17	trans	0.0259072	-2.43339	1.76375e-05	-0.221449
chr14_21460885_-	ENSG00000129472.15	RAB2B	0.00475323	12.7831	6.09432e-06	0.233314	hsa-miR-3117-3p	ENSG00000042980.13	ADAM28	trans	0.013362	-2.94025	1.57526e-05	-0.222707
chr14_21460885_-	ENSG00000129472.15	RAB2B	0.00475323	12.7831	6.09432e-06	0.233314	hsa-miR-3117-3p	ENSG00000053770.12	AP5M1	trans	0.0163608	-1.97188	7.35809e-06	-0.230999
chr14_21460885_-	ENSG00000129472.15	RAB2B	0.00475323	12.7831	6.09432e-06	0.233314	hsa-miR-3117-3p	ENSG00000058600.16	POLR3E	trans	0.00997076	-1.85321	2.92784e-06	-0.240644
chr14_21460885_-	ENSG00000129472.15	RAB2B	0.00475323	12.7831	6.09432e-06	0.233314	hsa-miR-3117-3p	ENSG00000063046.18	EIF4B	trans	0.00311092	-21.1117	8.162e-07	-0.25338
chr14_21460885_-	ENSG00000129472.15	RAB2B	0.00475323	12.7831	6.09432e-06	0.233314	hsa-miR-3117-3p	ENSG00000065809.13	FAM107B	trans	0.0107608	-9.04532	5.34063e-06	-0.234399
chr14_21460885_-	ENSG00000129472.15	RAB2B	0.00475323	12.7831	6.09432e-06	0.233314	hsa-miR-3117-3p	ENSG00000066294.15	CD84	trans	0.0105376	-3.13209	3.24477e-06	-0.239588
chr14_21460885_-	ENSG00000129472.15	RAB2B	0.00475323	12.7831	6.09432e-06	0.233314	hsa-miR-3117-3p	ENSG00000066654.14	THUMPD1	trans	0.0358972	-3.07035	7.65161e-05	-0.204408
chr14_21460885_-	ENSG00000129472.15	RAB2B	0.00475323	12.7831	6.09432e-06	0.233314	hsa-miR-3117-3p	ENSG00000070756.17	PABPC1	trans	0.0056369	-32.1005	1.47263e-06	-0.247581
chr14_21460885_-	ENSG00000129472.15	RAB2B	0.00475323	12.7831	6.09432e-06	0.233314	hsa-miR-3117-3p	ENSG00000071073.13	MGAT4A	trans	0.0171823	-8.37645	4.40904e-05	-0.21097
chr14_21460885_-	ENSG00000129472.15	RAB2B	0.00475323	12.7831	6.09432e-06	0.233314	hsa-miR-3117-3p	ENSG00000071082.11	RPL31	trans	0.0389445	-59.8814	7.19573e-05	-0.205149
chr14_21460885_-	ENSG00000129472.15	RAB2B	0.00475323	12.7831	6.09432e-06	0.233314	hsa-miR-3117-3p	ENSG00000072756.17	TRNT1	trans	0.000510246	-2.54643	1.32976e-08	-0.29039
chr14_21460885_-	ENSG00000129472.15	RAB2B	0.00475323	12.7831	6.09432e-06	0.233314	hsa-miR-3117-3p	ENSG00000072803.17	FBXW11	trans	0.0263993	-1.95521	2.06472e-05	-0.219683
chr14_21460885_-	ENSG00000129472.15	RAB2B	0.00475323	12.7831	6.09432e-06	0.233314	hsa-miR-3117-3p	ENSG00000073584.20	SMARCE1	trans	0.0206005	-3.54666	1.02445e-05	-0.227432
chr14_21460885_-	ENSG00000129472.15	RAB2B	0.00475323	12.7831	6.09432e-06	0.233314	hsa-miR-3117-3p	ENSG00000075975.17	MKRN2	trans	0.0368137	-2.55949	4.3711e-05	-0.211072
chr14_21460885_-	ENSG00000129472.15	RAB2B	0.00475323	12.7831	6.09432e-06	0.233314	hsa-miR-3117-3p	ENSG00000076641.4	PAG1	trans	0.0341593	-3.59228	7.70745e-05	-0.20432
chr14_21460885_-	ENSG00000129472.15	RAB2B	0.00475323	12.7831	6.09432e-06	0.233314	hsa-miR-3117-3p	ENSG00000077232.18	DNAJC10	trans	0.00909969	-2.26656	6.4467e-06	-0.232408
chr14_21460885_-	ENSG00000129472.15	RAB2B	0.00475323	12.7831	6.09432e-06	0.233314	hsa-miR-3117-3p	ENSG00000077458.13	FAM76B	trans	0.0188717	-2.78182	9.62064e-06	-0.228113
chr14_21460885_-	ENSG00000129472.15	RAB2B	0.00475323	12.7831	6.09432e-06	0.233314	hsa-miR-3117-3p	ENSG00000082074.19	FYB1	trans	0.0303925	-22.4409	3.19742e-05	-0.214704
chr14_21460885_-	ENSG00000129472.15	RAB2B	0.00475323	12.7831	6.09432e-06	0.233314	hsa-miR-3117-3p	ENSG00000082898.18	XPO1	trans	0.0171503	-5.23988	1.52324e-05	-0.223079
chr14_21460885_-	ENSG00000129472.15	RAB2B	0.00475323	12.7831	6.09432e-06	0.233314	hsa-miR-3117-3p	ENSG00000083799.18	CYLD	trans	0.0123435	-9.70768	9.59291e-06	-0.228144
chr14_21460885_-	ENSG00000129472.15	RAB2B	0.00475323	12.7831	6.09432e-06	0.233314	hsa-miR-3117-3p	ENSG00000083844.10	ZNF264	trans	0.0340318	-3.18871	4.27309e-05	-0.211337
chr14_21460885_-	ENSG00000129472.15	RAB2B	0.00475323	12.7831	6.09432e-06	0.233314	hsa-miR-3117-3p	ENSG00000085224.23	ATRX	trans	0.0194729	-5.81035	2.19348e-05	-0.219001
chr14_21460885_-	ENSG00000129472.15	RAB2B	0.00475323	12.7831	6.09432e-06	0.233314	hsa-miR-3117-3p	ENSG00000088387.19	DOCK9	trans	0.00773398	-1.73879	6.07841e-06	-0.233032
chr14_21460885_-	ENSG00000129472.15	RAB2B	0.00475323	12.7831	6.09432e-06	0.233314	hsa-miR-3117-3p	ENSG00000092108.22	SCFD1	trans	0.0110523	-4.58043	2.25709e-06	-0.243295
chr14_21460885_-	ENSG00000129472.15	RAB2B	0.00475323	12.7831	6.09432e-06	0.233314	hsa-miR-3117-3p	ENSG00000093144.19	ECHDC1	trans	0.000428384	-3.85856	1.30332e-08	-0.290558
chr14_21460885_-	ENSG00000129472.15	RAB2B	0.00475323	12.7831	6.09432e-06	0.233314	hsa-miR-3117-3p	ENSG00000100664.11	EIF5	trans	0.0255604	-6.06296	2.41094e-05	-0.217931
chr14_21460885_-	ENSG00000129472.15	RAB2B	0.00475323	12.7831	6.09432e-06	0.233314	hsa-miR-3117-3p	ENSG00000101191.17	DIDO1	trans	0.0140624	-4.124	9.27314e-06	-0.228511
chr14_21460885_-	ENSG00000129472.15	RAB2B	0.00475323	12.7831	6.09432e-06	0.233314	hsa-miR-3117-3p	ENSG00000101266.19	CSNK2A1	trans	0.034257	-4.55416	3.88649e-05	-0.212444
chr14_21460885_-	ENSG00000129472.15	RAB2B	0.00475323	12.7831	6.09432e-06	0.233314	hsa-miR-3117-3p	ENSG00000101558.14	VAPA	trans	0.0119066	-7.73976	6.27229e-06	-0.232699
chr14_21460885_-	ENSG00000129472.15	RAB2B	0.00475323	12.7831	6.09432e-06	0.233314	hsa-miR-3117-3p	ENSG00000101745.17	ANKRD12	trans	0.00137539	-6.18705	1.54998e-07	-0.268986
chr14_21460885_-	ENSG00000129472.15	RAB2B	0.00475323	12.7831	6.09432e-06	0.233314	hsa-miR-3117-3p	ENSG00000102317.18	RBM3	trans	0.00804245	-12.5812	2.0558e-06	-0.244239
chr14_21460885_-	ENSG00000129472.15	RAB2B	0.00475323	12.7831	6.09432e-06	0.233314	hsa-miR-3117-3p	ENSG00000102786.15	INTS6	trans	0.0100666	-3.47701	2.67094e-06	-0.241583
chr14_21460885_-	ENSG00000129472.15	RAB2B	0.00475323	12.7831	6.09432e-06	0.233314	hsa-miR-3117-3p	ENSG00000103365.15	GGA2	trans	0.0170358	-3.70985	1.45188e-05	-0.22361
chr14_21460885_-	ENSG00000129472.15	RAB2B	0.00475323	12.7831	6.09432e-06	0.233314	hsa-miR-3117-3p	ENSG00000104129.10	DNAJC17	trans	0.00220058	-2.44597	3.13929e-07	-0.262478
chr14_21460885_-	ENSG00000129472.15	RAB2B	0.00475323	12.7831	6.09432e-06	0.233314	hsa-miR-3117-3p	ENSG00000106052.13	TAX1BP1	trans	0.0020494	-7.62747	2.03711e-07	-0.266486
chr14_21460885_-	ENSG00000129472.15	RAB2B	0.00475323	12.7831	6.09432e-06	0.233314	hsa-miR-3117-3p	ENSG00000106443.17	PHF14	trans	0.000316542	-2.8655	6.87116e-09	-0.295851
chr14_21460885_-	ENSG00000129472.15	RAB2B	0.00475323	12.7831	6.09432e-06	0.233314	hsa-miR-3117-3p	ENSG00000106459.15	NRF1	trans	0.024235	-1.55345	3.21936e-05	-0.214625
chr14_21460885_-	ENSG00000129472.15	RAB2B	0.00475323	12.7831	6.09432e-06	0.233314	hsa-miR-3117-3p	ENSG00000106460.19	TMEM106B	trans	0.000843398	-1.99615	1.03614e-07	-0.272623
chr14_21460885_-	ENSG00000129472.15	RAB2B	0.00475323	12.7831	6.09432e-06	0.233314	hsa-miR-3117-3p	ENSG00000106546.14	AHR	trans	0.0361976	-2.0499	4.84261e-05	-0.209868
chr14_21460885_-	ENSG00000129472.15	RAB2B	0.00475323	12.7831	6.09432e-06	0.233314	hsa-miR-3117-3p	ENSG00000106799.13	TGFBR1	trans	0.00737773	-3.33809	1.86415e-06	-0.245225
chr14_21460885_-	ENSG00000129472.15	RAB2B	0.00475323	12.7831	6.09432e-06	0.233314	hsa-miR-3117-3p	ENSG00000107372.13	ZFAND5	trans	0.0458006	-5.50573	6.94951e-05	-0.205568
chr14_21460885_-	ENSG00000129472.15	RAB2B	0.00475323	12.7831	6.09432e-06	0.233314	hsa-miR-3117-3p	ENSG00000107643.16	MAPK8	trans	0.00213664	-2.1967	2.23466e-07	-0.265634
chr14_21460885_-	ENSG00000129472.15	RAB2B	0.00475323	12.7831	6.09432e-06	0.233314	hsa-miR-3117-3p	ENSG00000107679.14	PLEKHA1	trans	0.00283486	-1.86222	3.65219e-07	-0.26106
chr14_21460885_-	ENSG00000129472.15	RAB2B	0.00475323	12.7831	6.09432e-06	0.233314	hsa-miR-3117-3p	ENSG00000107771.17	CCSER2	trans	0.00143094	-3.28888	1.45044e-07	-0.269589
chr14_21460885_-	ENSG00000129472.15	RAB2B	0.00475323	12.7831	6.09432e-06	0.233314	hsa-miR-3117-3p	ENSG00000107897.20	ACBD5	trans	0.0101983	-1.80219	2.38796e-06	-0.242723
chr14_21460885_-	ENSG00000129472.15	RAB2B	0.00475323	12.7831	6.09432e-06	0.233314	hsa-miR-3117-3p	ENSG00000109180.15	OCIAD1	trans	0.00262696	-3.81065	1.90788e-07	-0.267088
chr14_21460885_-	ENSG00000129472.15	RAB2B	0.00475323	12.7831	6.09432e-06	0.233314	hsa-miR-3117-3p	ENSG00000109911.19	ELP4	trans	0.010284	-1.67647	1.62205e-06	-0.246618
chr14_21460885_-	ENSG00000129472.15	RAB2B	0.00475323	12.7831	6.09432e-06	0.233314	hsa-miR-3117-3p	ENSG00000110696.10	C11orf58	trans	0.0286424	-9.5798	3.18848e-05	-0.215023
chr14_21460885_-	ENSG00000129472.15	RAB2B	0.00475323	12.7831	6.09432e-06	0.233314	hsa-miR-3117-3p	ENSG00000111530.13	CAND1	trans	0.00152316	-3.95183	1.30112e-07	-0.270929
chr14_21460885_-	ENSG00000129472.15	RAB2B	0.00475323	12.7831	6.09432e-06	0.233314	hsa-miR-3117-3p	ENSG00000111554.14	MDM1	trans	0.0273546	-1.53112	1.24889e-05	-0.225569
chr14_21460885_-	ENSG00000129472.15	RAB2B	0.00475323	12.7831	6.09432e-06	0.233314	hsa-miR-3117-3p	ENSG00000111596.14	CNOT2	trans	0.0081745	-8.07691	2.27027e-06	-0.243558
chr14_21460885_-	ENSG00000129472.15	RAB2B	0.00475323	12.7831	6.09432e-06	0.233314	hsa-miR-3117-3p	ENSG00000111605.18	CPSF6	trans	0.000484855	-2.41271	3.59269e-08	-0.282315
chr14_21460885_-	ENSG00000129472.15	RAB2B	0.00475323	12.7831	6.09432e-06	0.233314	hsa-miR-3117-3p	ENSG00000111877.17	MCM9	trans	0.00346284	-2.09973	4.00702e-07	-0.26053
chr14_21460885_-	ENSG00000129472.15	RAB2B	0.00475323	12.7831	6.09432e-06	0.233314	hsa-miR-3117-3p	ENSG00000112249.14	ASCC3	trans	0.00132229	-3.06632	2.25773e-07	-0.265889
chr14_21460885_-	ENSG00000129472.15	RAB2B	0.00475323	12.7831	6.09432e-06	0.233314	hsa-miR-3117-3p	ENSG00000112339.15	HBS1L	trans	0.00692739	-3.11305	6.18938e-06	-0.23315
chr14_21460885_-	ENSG00000129472.15	RAB2B	0.00475323	12.7831	6.09432e-06	0.233314	hsa-miR-3117-3p	ENSG00000112701.18	SENP6	trans	0.0162807	-7.22646	1.07652e-05	-0.227194
chr14_21460885_-	ENSG00000129472.15	RAB2B	0.00475323	12.7831	6.09432e-06	0.233314	hsa-miR-3117-3p	ENSG00000112851.15	ERBIN	trans	0.0496971	-6.24953	0.000116935	-0.19948
chr14_21460885_-	ENSG00000129472.15	RAB2B	0.00475323	12.7831	6.09432e-06	0.233314	hsa-miR-3117-3p	ENSG00000113163.18	CERT1	trans	0.0144407	-3.88674	7.51091e-06	-0.231086
chr14_21460885_-	ENSG00000129472.15	RAB2B	0.00475323	12.7831	6.09432e-06	0.233314	hsa-miR-3117-3p	ENSG00000113240.13	CLK4	trans	0.00529862	-6.69951	1.61382e-06	-0.246996
chr14_21460885_-	ENSG00000129472.15	RAB2B	0.00475323	12.7831	6.09432e-06	0.233314	hsa-miR-3117-3p	ENSG00000113441.16	LNPEP	trans	0.0478646	-4.00135	0.00012609	-0.198542
chr14_21460885_-	ENSG00000129472.15	RAB2B	0.00475323	12.7831	6.09432e-06	0.233314	hsa-miR-3117-3p	ENSG00000113658.18	SMAD5	trans	0.00745195	-1.94296	2.59986e-06	-0.242179
chr14_21460885_-	ENSG00000129472.15	RAB2B	0.00475323	12.7831	6.09432e-06	0.233314	hsa-miR-3117-3p	ENSG00000113810.16	SMC4	trans	0.00864828	-2.21534	2.11435e-06	-0.244279
chr14_21460885_-	ENSG00000129472.15	RAB2B	0.00475323	12.7831	6.09432e-06	0.233314	hsa-miR-3117-3p	ENSG00000114062.22	UBE3A	trans	0.00550657	-4.95334	6.14189e-07	-0.256462
chr14_21460885_-	ENSG00000129472.15	RAB2B	0.00475323	12.7831	6.09432e-06	0.233314	hsa-miR-3117-3p	ENSG00000114098.18	ARMC8	trans	0.020578	-3.68164	2.35528e-05	-0.218487
chr14_21460885_-	ENSG00000129472.15	RAB2B	0.00475323	12.7831	6.09432e-06	0.233314	hsa-miR-3117-3p	ENSG00000114742.14	WDR48	trans	0.0087081	-2.92959	3.43148e-06	-0.239328
chr14_21460885_-	ENSG00000129472.15	RAB2B	0.00475323	12.7831	6.09432e-06	0.233314	hsa-miR-3117-3p	ENSG00000114850.7	SSR3	trans	0.0127882	-3.53613	7.87544e-06	-0.230577
chr14_21460885_-	ENSG00000129472.15	RAB2B	0.00475323	12.7831	6.09432e-06	0.233314	hsa-miR-3117-3p	ENSG00000114933.16	INO80D	trans	0.0310732	-1.38679	4.09252e-05	-0.212125
chr14_21460885_-	ENSG00000129472.15	RAB2B	0.00475323	12.7831	6.09432e-06	0.233314	hsa-miR-3117-3p	ENSG00000115084.15	SLC35F5	trans	0.0315225	-2.58032	3.66955e-05	-0.213396
chr14_21460885_-	ENSG00000129472.15	RAB2B	0.00475323	12.7831	6.09432e-06	0.233314	hsa-miR-3117-3p	ENSG00000115966.17	ATF2	trans	0.00313886	-2.79451	5.53378e-07	-0.257461
chr14_21460885_-	ENSG00000129472.15	RAB2B	0.00475323	12.7831	6.09432e-06	0.233314	hsa-miR-3117-3p	ENSG00000115977.20	AAK1	trans	0.0205521	-4.57718	3.45263e-05	-0.214103
chr14_21460885_-	ENSG00000129472.15	RAB2B	0.00475323	12.7831	6.09432e-06	0.233314	hsa-miR-3117-3p	ENSG00000116251.11	RPL22	trans	0.000128322	-26.286	4.07334e-09	-0.300487
chr14_21460885_-	ENSG00000129472.15	RAB2B	0.00475323	12.7831	6.09432e-06	0.233314	hsa-miR-3117-3p	ENSG00000116473.14	RAP1A	trans	0.00839539	-5.18847	3.0156e-06	-0.24066
chr14_21460885_-	ENSG00000129472.15	RAB2B	0.00475323	12.7831	6.09432e-06	0.233314	hsa-miR-3117-3p	ENSG00000116539.14	ASH1L	trans	0.00552002	-3.84144	1.45288e-06	-0.248044
chr14_21460885_-	ENSG00000129472.15	RAB2B	0.00475323	12.7831	6.09432e-06	0.233314	hsa-miR-3117-3p	ENSG00000116679.16	IVNS1ABP	trans	0.0389839	-8.36565	3.89854e-05	-0.212692
chr14_21460885_-	ENSG00000129472.15	RAB2B	0.00475323	12.7831	6.09432e-06	0.233314	hsa-miR-3117-3p	ENSG00000117020.18	AKT3	trans	0.000119973	-2.8716	3.40166e-09	-0.301935
chr14_21460885_-	ENSG00000129472.15	RAB2B	0.00475323	12.7831	6.09432e-06	0.233314	hsa-miR-3117-3p	ENSG00000117091.10	CD48	trans	0.00207858	-22.5195	4.01591e-07	-0.260509
chr14_21460885_-	ENSG00000129472.15	RAB2B	0.00475323	12.7831	6.09432e-06	0.233314	hsa-miR-3117-3p	ENSG00000117280.13	RAB29	trans	0.0495376	-2.63487	8.11026e-05	-0.203975
chr14_21460885_-	ENSG00000129472.15	RAB2B	0.00475323	12.7831	6.09432e-06	0.233314	hsa-miR-3117-3p	ENSG00000117620.15	SLC35A3	trans	0.00275042	-1.53007	2.61398e-07	-0.264531
chr14_21460885_-	ENSG00000129472.15	RAB2B	0.00475323	12.7831	6.09432e-06	0.233314	hsa-miR-3117-3p	ENSG00000117625.14	RCOR3	trans	0.0149194	-3.16858	8.90581e-06	-0.229253
chr14_21460885_-	ENSG00000129472.15	RAB2B	0.00475323	12.7831	6.09432e-06	0.233314	hsa-miR-3117-3p	ENSG00000118058.23	KMT2A	trans	0.0226511	-4.11862	1.9308e-05	-0.22073
chr14_21460885_-	ENSG00000129472.15	RAB2B	0.00475323	12.7831	6.09432e-06	0.233314	hsa-miR-3117-3p	ENSG00000118922.17	KLF12	trans	0.00264802	-2.04933	6.83183e-07	-0.255437
chr14_21460885_-	ENSG00000129472.15	RAB2B	0.00475323	12.7831	6.09432e-06	0.233314	hsa-miR-3117-3p	ENSG00000119231.11	SENP5	trans	0.00762455	-2.89013	2.5923e-06	-0.242208
chr14_21460885_-	ENSG00000129472.15	RAB2B	0.00475323	12.7831	6.09432e-06	0.233314	hsa-miR-3117-3p	ENSG00000119844.15	AFTPH	trans	0.0368338	-2.50408	4.67823e-05	-0.210556
chr14_21460885_-	ENSG00000129472.15	RAB2B	0.00475323	12.7831	6.09432e-06	0.233314	hsa-miR-3117-3p	ENSG00000119866.22	BCL11A	trans	0.0109348	-3.42902	9.17888e-06	-0.228926
chr14_21460885_-	ENSG00000129472.15	RAB2B	0.00475323	12.7831	6.09432e-06	0.233314	hsa-miR-3117-3p	ENSG00000119906.13	SLF2	trans	0.0355138	-2.09793	6.86382e-06	-0.232049
chr14_21460885_-	ENSG00000129472.15	RAB2B	0.00475323	12.7831	6.09432e-06	0.233314	hsa-miR-3117-3p	ENSG00000120008.16	WDR11	trans	0.0162259	-3.08301	8.95967e-06	-0.229187
chr14_21460885_-	ENSG00000129472.15	RAB2B	0.00475323	12.7831	6.09432e-06	0.233314	hsa-miR-3117-3p	ENSG00000120253.14	NUP43	trans	0.00283927	-2.33979	5.08028e-07	-0.258278
chr14_21460885_-	ENSG00000129472.15	RAB2B	0.00475323	12.7831	6.09432e-06	0.233314	hsa-miR-3117-3p	ENSG00000120451.11	SNX19	trans	0.0371819	-3.53424	5.64808e-05	-0.208326
chr14_21460885_-	ENSG00000129472.15	RAB2B	0.00475323	12.7831	6.09432e-06	0.233314	hsa-miR-3117-3p	ENSG00000120802.14	TMPO	trans	0.00906297	-7.60874	6.33078e-06	-0.23291
chr14_21460885_-	ENSG00000129472.15	RAB2B	0.00475323	12.7831	6.09432e-06	0.233314	hsa-miR-3117-3p	ENSG00000121774.18	KHDRBS1	trans	0.0120012	-3.08456	7.11931e-06	-0.231659
chr14_21460885_-	ENSG00000129472.15	RAB2B	0.00475323	12.7831	6.09432e-06	0.233314	hsa-miR-3117-3p	ENSG00000121879.6	PIK3CA	trans	0.0033677	-1.99768	6.94366e-07	-0.25528
chr14_21460885_-	ENSG00000129472.15	RAB2B	0.00475323	12.7831	6.09432e-06	0.233314	hsa-miR-3117-3p	ENSG00000122042.10	UBL3	trans	0.00877564	-1.82807	2.22049e-06	-0.243783
chr14_21460885_-	ENSG00000129472.15	RAB2B	0.00475323	12.7831	6.09432e-06	0.233314	hsa-miR-3117-3p	ENSG00000122068.13	FYTTD1	trans	0.0134065	-1.97395	8.38602e-06	-0.229901
chr14_21460885_-	ENSG00000129472.15	RAB2B	0.00475323	12.7831	6.09432e-06	0.233314	hsa-miR-3117-3p	ENSG00000122545.20	SEPTIN7	trans	0.0156322	-11.0642	8.47674e-06	-0.229785
chr14_21460885_-	ENSG00000129472.15	RAB2B	0.00475323	12.7831	6.09432e-06	0.233314	hsa-miR-3117-3p	ENSG00000122566.22	HNRNPA2B1	trans	0.0090251	-14.2993	3.56693e-06	-0.238928
chr14_21460885_-	ENSG00000129472.15	RAB2B	0.00475323	12.7831	6.09432e-06	0.233314	hsa-miR-3117-3p	ENSG00000123200.17	ZC3H13	trans	0.00645184	-2.12821	2.112e-06	-0.24429
chr14_21460885_-	ENSG00000129472.15	RAB2B	0.00475323	12.7831	6.09432e-06	0.233314	hsa-miR-3117-3p	ENSG00000126070.20	AGO3	trans	0.023014	-1.88755	3.42535e-05	-0.214195
chr14_21460885_-	ENSG00000129472.15	RAB2B	0.00475323	12.7831	6.09432e-06	0.233314	hsa-miR-3117-3p	ENSG00000127152.18	BCL11B	trans	0.00959441	-2.42682	1.26967e-05	-0.225388
chr14_21460885_-	ENSG00000129472.15	RAB2B	0.00475323	12.7831	6.09432e-06	0.233314	hsa-miR-3117-3p	ENSG00000127314.18	RAP1B	trans	0.0366372	-14.3712	3.33595e-05	-0.214501
chr14_21460885_-	ENSG00000129472.15	RAB2B	0.00475323	12.7831	6.09432e-06	0.233314	hsa-miR-3117-3p	ENSG00000127334.11	DYRK2	trans	0.00442816	-3.83667	2.08181e-06	-0.244436
chr14_21460885_-	ENSG00000129472.15	RAB2B	0.00475323	12.7831	6.09432e-06	0.233314	hsa-miR-3117-3p	ENSG00000128159.12	TUBGCP6	trans	0.0339714	-2.21456	7.51773e-05	-0.204895
chr14_21460885_-	ENSG00000129472.15	RAB2B	0.00475323	12.7831	6.09432e-06	0.233314	hsa-miR-3117-3p	ENSG00000128534.8	LSM8	trans	0.000329862	-2.874	2.14078e-08	-0.286754
chr14_21460885_-	ENSG00000129472.15	RAB2B	0.00475323	12.7831	6.09432e-06	0.233314	hsa-miR-3117-3p	ENSG00000128699.14	ORMDL1	trans	0.00374118	-4.998	1.04892e-06	-0.251264
chr14_21460885_-	ENSG00000129472.15	RAB2B	0.00475323	12.7831	6.09432e-06	0.233314	hsa-miR-3117-3p	ENSG00000129103.19	SUMF2	trans	0.0478429	-3.13253	8.85322e-05	-0.202907
chr14_21460885_-	ENSG00000129472.15	RAB2B	0.00475323	12.7831	6.09432e-06	0.233314	hsa-miR-3117-3p	ENSG00000129351.17	ILF3	trans	0.0154841	-4.67696	1.61706e-05	-0.222712
chr14_21460885_-	ENSG00000129472.15	RAB2B	0.00475323	12.7831	6.09432e-06	0.233314	hsa-miR-3117-3p	ENSG00000130826.18	DKC1	trans	0.0337925	-1.47251	5.89892e-05	-0.207808
chr14_21460885_-	ENSG00000129472.15	RAB2B	0.00475323	12.7831	6.09432e-06	0.233314	hsa-miR-3117-3p	ENSG00000130935.10	NOL11	trans	0.0376959	-2.00116	3.13901e-05	-0.215203
chr14_21460885_-	ENSG00000129472.15	RAB2B	0.00475323	12.7831	6.09432e-06	0.233314	hsa-miR-3117-3p	ENSG00000131051.24	RBM39	trans	0.00500398	-29.9869	1.23311e-06	-0.249671
chr14_21460885_-	ENSG00000129472.15	RAB2B	0.00475323	12.7831	6.09432e-06	0.233314	hsa-miR-3117-3p	ENSG00000131263.13	RLIM	trans	0.0343568	-2.64529	5.18769e-05	-0.209335
chr14_21460885_-	ENSG00000129472.15	RAB2B	0.00475323	12.7831	6.09432e-06	0.233314	hsa-miR-3117-3p	ENSG00000131368.8	MRPS25	trans	0.000530066	-3.49074	3.90479e-08	-0.281593
chr14_21460885_-	ENSG00000129472.15	RAB2B	0.00475323	12.7831	6.09432e-06	0.233314	hsa-miR-3117-3p	ENSG00000131378.14	RFTN1	trans	0.0126936	-2.5008	1.00342e-05	-0.22796
chr14_21460885_-	ENSG00000129472.15	RAB2B	0.00475323	12.7831	6.09432e-06	0.233314	hsa-miR-3117-3p	ENSG00000131507.11	NDFIP1	trans	0.00176103	-3.94555	3.90352e-07	-0.260777
chr14_21460885_-	ENSG00000129472.15	RAB2B	0.00475323	12.7831	6.09432e-06	0.233314	hsa-miR-3117-3p	ENSG00000132581.10	SDF2	trans	0.0249662	-3.28927	2.27921e-05	-0.218859
chr14_21460885_-	ENSG00000129472.15	RAB2B	0.00475323	12.7831	6.09432e-06	0.233314	hsa-miR-3117-3p	ENSG00000133028.12	SCO1	trans	0.00802315	-1.56555	1.18611e-06	-0.250054
chr14_21460885_-	ENSG00000129472.15	RAB2B	0.00475323	12.7831	6.09432e-06	0.233314	hsa-miR-3117-3p	ENSG00000133639.6	BTG1	trans	0.00301208	-22.2604	6.52784e-07	-0.255876
chr14_21460885_-	ENSG00000129472.15	RAB2B	0.00475323	12.7831	6.09432e-06	0.233314	hsa-miR-3117-3p	ENSG00000133657.16	ATP13A3	trans	0.00429528	-2.00475	1.67213e-06	-0.246641
chr14_21460885_-	ENSG00000129472.15	RAB2B	0.00475323	12.7831	6.09432e-06	0.233314	hsa-miR-3117-3p	ENSG00000134046.12	MBD2	trans	0.0361555	-2.41019	4.66931e-05	-0.210578
chr14_21460885_-	ENSG00000129472.15	RAB2B	0.00475323	12.7831	6.09432e-06	0.233314	hsa-miR-3117-3p	ENSG00000134242.16	PTPN22	trans	0.000231715	-2.74886	4.77064e-09	-0.29921
chr14_21460885_-	ENSG00000129472.15	RAB2B	0.00475323	12.7831	6.09432e-06	0.233314	hsa-miR-3117-3p	ENSG00000134954.14	ETS1	trans	0.020284	-12.8143	4.27677e-05	-0.211609
chr14_21460885_-	ENSG00000129472.15	RAB2B	0.00475323	12.7831	6.09432e-06	0.233314	hsa-miR-3117-3p	ENSG00000135241.17	PNPLA8	trans	0.00421756	-2.08225	9.18087e-07	-0.252569
chr14_21460885_-	ENSG00000129472.15	RAB2B	0.00475323	12.7831	6.09432e-06	0.233314	hsa-miR-3117-3p	ENSG00000135316.19	SYNCRIP	trans	0.00196985	-3.10479	3.12679e-07	-0.262861
chr14_21460885_-	ENSG00000129472.15	RAB2B	0.00475323	12.7831	6.09432e-06	0.233314	hsa-miR-3117-3p	ENSG00000135387.21	CAPRIN1	trans	0.0116149	-5.37805	5.39077e-06	-0.234612
chr14_21460885_-	ENSG00000129472.15	RAB2B	0.00475323	12.7831	6.09432e-06	0.233314	hsa-miR-3117-3p	ENSG00000135426.16	TESPA1	trans	0.00179313	-2.51043	3.45878e-07	-0.261916
chr14_21460885_-	ENSG00000129472.15	RAB2B	0.00475323	12.7831	6.09432e-06	0.233314	hsa-miR-3117-3p	ENSG00000135597.19	REPS1	trans	0.0342593	-1.94269	6.29314e-05	-0.207035
chr14_21460885_-	ENSG00000129472.15	RAB2B	0.00475323	12.7831	6.09432e-06	0.233314	hsa-miR-3117-3p	ENSG00000135679.25	MDM2	trans	0.00405311	-6.91613	5.1072e-07	-0.258228
chr14_21460885_-	ENSG00000129472.15	RAB2B	0.00475323	12.7831	6.09432e-06	0.233314	hsa-miR-3117-3p	ENSG00000135905.20	DOCK10	trans	0.00215926	-6.51362	8.50266e-07	-0.253317
chr14_21460885_-	ENSG00000129472.15	RAB2B	0.00475323	12.7831	6.09432e-06	0.233314	hsa-miR-3117-3p	ENSG00000135968.21	GCC2	trans	0.000207727	-4.79934	4.92347e-09	-0.298954
chr14_21460885_-	ENSG00000129472.15	RAB2B	0.00475323	12.7831	6.09432e-06	0.233314	hsa-miR-3117-3p	ENSG00000135999.12	EPC2	trans	0.0271184	-2.08368	1.69792e-05	-0.222169
chr14_21460885_-	ENSG00000129472.15	RAB2B	0.00475323	12.7831	6.09432e-06	0.233314	hsa-miR-3117-3p	ENSG00000136051.15	WASHC4	trans	0.0165467	-8.22055	9.68972e-06	-0.228339
chr14_21460885_-	ENSG00000129472.15	RAB2B	0.00475323	12.7831	6.09432e-06	0.233314	hsa-miR-3117-3p	ENSG00000136143.16	SUCLA2	trans	0.000413418	-1.88021	5.18983e-09	-0.298527
chr14_21460885_-	ENSG00000129472.15	RAB2B	0.00475323	12.7831	6.09432e-06	0.233314	hsa-miR-3117-3p	ENSG00000136536.15	MARCHF7	trans	0.0222275	-8.52228	2.5868e-05	-0.21742
chr14_21460885_-	ENSG00000129472.15	RAB2B	0.00475323	12.7831	6.09432e-06	0.233314	hsa-miR-3117-3p	ENSG00000137075.18	RNF38	trans	0.0124754	-1.8198	1.34765e-06	-0.248791
chr14_21460885_-	ENSG00000129472.15	RAB2B	0.00475323	12.7831	6.09432e-06	0.233314	hsa-miR-3117-3p	ENSG00000137145.20	DENND4C	trans	0.00575679	-2.39541	1.39078e-06	-0.248478
chr14_21460885_-	ENSG00000129472.15	RAB2B	0.00475323	12.7831	6.09432e-06	0.233314	hsa-miR-3117-3p	ENSG00000137500.9	CCDC90B	trans	0.000186924	-1.96798	3.80097e-09	-0.301044
chr14_21460885_-	ENSG00000129472.15	RAB2B	0.00475323	12.7831	6.09432e-06	0.233314	hsa-miR-3117-3p	ENSG00000137947.12	GTF2B	trans	0.0120232	-1.83743	4.17835e-06	-0.237284
chr14_21460885_-	ENSG00000129472.15	RAB2B	0.00475323	12.7831	6.09432e-06	0.233314	hsa-miR-3117-3p	ENSG00000138468.16	SENP7	trans	0.00829877	-2.95809	4.14257e-06	-0.237374
chr14_21460885_-	ENSG00000129472.15	RAB2B	0.00475323	12.7831	6.09432e-06	0.233314	hsa-miR-3117-3p	ENSG00000138614.15	INTS14	trans	0.0362986	-1.90904	6.44779e-05	-0.206744
chr14_21460885_-	ENSG00000129472.15	RAB2B	0.00475323	12.7831	6.09432e-06	0.233314	hsa-miR-3117-3p	ENSG00000138698.15	RAP1GDS1	trans	0.00489326	-2.35797	1.38658e-06	-0.248508
chr14_21460885_-	ENSG00000129472.15	RAB2B	0.00475323	12.7831	6.09432e-06	0.233314	hsa-miR-3117-3p	ENSG00000139684.15	ESD	trans	0.0115962	-2.27512	4.08288e-06	-0.237525
chr14_21460885_-	ENSG00000129472.15	RAB2B	0.00475323	12.7831	6.09432e-06	0.233314	hsa-miR-3117-3p	ENSG00000139921.13	TMX1	trans	0.0143931	-2.09164	9.93034e-06	-0.228073
chr14_21460885_-	ENSG00000129472.15	RAB2B	0.00475323	12.7831	6.09432e-06	0.233314	hsa-miR-3117-3p	ENSG00000140391.15	TSPAN3	trans	0.0375422	-1.64245	7.13082e-05	-0.205533
chr14_21460885_-	ENSG00000129472.15	RAB2B	0.00475323	12.7831	6.09432e-06	0.233314	hsa-miR-3117-3p	ENSG00000140694.17	PARN	trans	0.0345695	-2.01359	1.11032e-05	-0.226857
chr14_21460885_-	ENSG00000129472.15	RAB2B	0.00475323	12.7831	6.09432e-06	0.233314	hsa-miR-3117-3p	ENSG00000140718.21	FTO	trans	0.0264299	-2.25745	2.08092e-05	-0.219888
chr14_21460885_-	ENSG00000129472.15	RAB2B	0.00475323	12.7831	6.09432e-06	0.233314	hsa-miR-3117-3p	ENSG00000140987.20	ZSCAN32	trans	0.027196	-1.35804	2.59894e-05	-0.217367
chr14_21460885_-	ENSG00000129472.15	RAB2B	0.00475323	12.7831	6.09432e-06	0.233314	hsa-miR-3117-3p	ENSG00000141425.18	RPRD1A	trans	0.0163298	-3.17281	1.46204e-05	-0.223831
chr14_21460885_-	ENSG00000129472.15	RAB2B	0.00475323	12.7831	6.09432e-06	0.233314	hsa-miR-3117-3p	ENSG00000141627.14	DYM	trans	0.0214983	-2.95925	2.30446e-05	-0.218734
chr14_21460885_-	ENSG00000129472.15	RAB2B	0.00475323	12.7831	6.09432e-06	0.233314	hsa-miR-3117-3p	ENSG00000143198.13	MGST3	trans	0.00957953	-3.52654	2.38953e-06	-0.243038
chr14_21460885_-	ENSG00000129472.15	RAB2B	0.00475323	12.7831	6.09432e-06	0.233314	hsa-miR-3117-3p	ENSG00000143575.15	HAX1	trans	0.0213143	-3.25	2.07635e-05	-0.219912
chr14_21460885_-	ENSG00000129472.15	RAB2B	0.00475323	12.7831	6.09432e-06	0.233314	hsa-miR-3117-3p	ENSG00000143771.12	CNIH4	trans	0.0136172	-2.43061	3.62386e-06	-0.238764
chr14_21460885_-	ENSG00000129472.15	RAB2B	0.00475323	12.7831	6.09432e-06	0.233314	hsa-miR-3117-3p	ENSG00000144224.17	UBXN4	trans	0.00444795	-4.40578	9.17472e-07	-0.252575
chr14_21460885_-	ENSG00000129472.15	RAB2B	0.00475323	12.7831	6.09432e-06	0.233314	hsa-miR-3117-3p	ENSG00000144401.14	METTL21A	trans	0.00269277	-2.07433	2.04206e-07	-0.266815
chr14_21460885_-	ENSG00000129472.15	RAB2B	0.00475323	12.7831	6.09432e-06	0.233314	hsa-miR-3117-3p	ENSG00000144848.11	ATG3	trans	0.049812	-4.19325	7.45519e-05	-0.204996
chr14_21460885_-	ENSG00000129472.15	RAB2B	0.00475323	12.7831	6.09432e-06	0.233314	hsa-miR-3117-3p	ENSG00000145592.14	RPL37	trans	0.000494703	-66.3663	6.37553e-08	-0.277304
chr14_21460885_-	ENSG00000129472.15	RAB2B	0.00475323	12.7831	6.09432e-06	0.233314	hsa-miR-3117-3p	ENSG00000145675.15	PIK3R1	trans	0.00514142	-4.42279	1.88758e-06	-0.245424
chr14_21460885_-	ENSG00000129472.15	RAB2B	0.00475323	12.7831	6.09432e-06	0.233314	hsa-miR-3117-3p	ENSG00000145734.19	BDP1	trans	0.00217155	-1.646	3.35725e-07	-0.262195
chr14_21460885_-	ENSG00000129472.15	RAB2B	0.00475323	12.7831	6.09432e-06	0.233314	hsa-miR-3117-3p	ENSG00000145782.13	ATG12	trans	0.00515203	-4.39317	1.20188e-06	-0.249924
chr14_21460885_-	ENSG00000129472.15	RAB2B	0.00475323	12.7831	6.09432e-06	0.233314	hsa-miR-3117-3p	ENSG00000146414.16	SHPRH	trans	0.00127405	-1.70496	1.20814e-07	-0.271599
chr14_21460885_-	ENSG00000129472.15	RAB2B	0.00475323	12.7831	6.09432e-06	0.233314	hsa-miR-3117-3p	ENSG00000147099.21	HDAC8	trans	0.0204189	-2.25322	5.12027e-06	-0.235155
chr14_21460885_-	ENSG00000129472.15	RAB2B	0.00475323	12.7831	6.09432e-06	0.233314	hsa-miR-3117-3p	ENSG00000151690.15	MFSD6	trans	0.0159236	-2.41751	1.18155e-05	-0.226177
chr14_21460885_-	ENSG00000129472.15	RAB2B	0.00475323	12.7831	6.09432e-06	0.233314	hsa-miR-3117-3p	ENSG00000152256.14	PDK1	trans	0.0100623	-1.91394	8.51909e-06	-0.229732
chr14_21460885_-	ENSG00000129472.15	RAB2B	0.00475323	12.7831	6.09432e-06	0.233314	hsa-miR-3117-3p	ENSG00000152443.13	ZNF776	trans	0.0150392	-2.26783	6.64791e-06	-0.23239
chr14_21460885_-	ENSG00000129472.15	RAB2B	0.00475323	12.7831	6.09432e-06	0.233314	hsa-miR-3117-3p	ENSG00000153037.15	SRP19	trans	0.00270262	-2.9735	2.46092e-07	-0.265091
chr14_21460885_-	ENSG00000129472.15	RAB2B	0.00475323	12.7831	6.09432e-06	0.233314	hsa-miR-3117-3p	ENSG00000153147.6	SMARCA5	trans	0.000125763	-2.71908	3.66836e-09	-0.30133
chr14_21460885_-	ENSG00000129472.15	RAB2B	0.00475323	12.7831	6.09432e-06	0.233314	hsa-miR-3117-3p	ENSG00000154642.11	C21orf91	trans	0.0260259	-1.86534	2.91809e-05	-0.216042
chr14_21460885_-	ENSG00000129472.15	RAB2B	0.00475323	12.7831	6.09432e-06	0.233314	hsa-miR-3117-3p	ENSG00000155463.14	OXA1L	trans	0.0190562	-4.31921	1.87257e-05	-0.221074
chr14_21460885_-	ENSG00000129472.15	RAB2B	0.00475323	12.7831	6.09432e-06	0.233314	hsa-miR-3117-3p	ENSG00000156508.19	EEF1A1	trans	9.05434e-06	-626.352	1.83684e-10	-0.324365
chr14_21460885_-	ENSG00000129472.15	RAB2B	0.00475323	12.7831	6.09432e-06	0.233314	hsa-miR-3117-3p	ENSG00000157106.17	SMG1	trans	0.0470967	-6.749	9.84942e-05	-0.201601
chr14_21460885_-	ENSG00000129472.15	RAB2B	0.00475323	12.7831	6.09432e-06	0.233314	hsa-miR-3117-3p	ENSG00000158615.9	PPP1R15B	trans	0.0196009	-3.68383	1.16391e-05	-0.226342
chr14_21460885_-	ENSG00000129472.15	RAB2B	0.00475323	12.7831	6.09432e-06	0.233314	hsa-miR-3117-3p	ENSG00000158711.14	ELK4	trans	0.00908611	-2.26151	5.11674e-06	-0.235162
chr14_21460885_-	ENSG00000129472.15	RAB2B	0.00475323	12.7831	6.09432e-06	0.233314	hsa-miR-3117-3p	ENSG00000159216.19	RUNX1	trans	0.0128174	-4.89623	3.46114e-06	-0.239239
chr14_21460885_-	ENSG00000129472.15	RAB2B	0.00475323	12.7831	6.09432e-06	0.233314	hsa-miR-3117-3p	ENSG00000159445.13	THEM4	trans	0.000986085	-2.63206	2.69329e-07	-0.264254
chr14_21460885_-	ENSG00000129472.15	RAB2B	0.00475323	12.7831	6.09432e-06	0.233314	hsa-miR-3117-3p	ENSG00000159593.15	NAE1	trans	0.000209119	-1.98313	1.27053e-08	-0.291151
chr14_21460885_-	ENSG00000129472.15	RAB2B	0.00475323	12.7831	6.09432e-06	0.233314	hsa-miR-3117-3p	ENSG00000160654.11	CD3G	trans	5.30588e-06	-4.90613	8.706e-11	-0.329816
chr14_21460885_-	ENSG00000129472.15	RAB2B	0.00475323	12.7831	6.09432e-06	0.233314	hsa-miR-3117-3p	ENSG00000160688.19	FLAD1	trans	0.0311785	-1.39358	2.91642e-05	-0.216048
chr14_21460885_-	ENSG00000129472.15	RAB2B	0.00475323	12.7831	6.09432e-06	0.233314	hsa-miR-3117-3p	ENSG00000160856.21	FCRL3	trans	0.00948677	-2.39333	4.57791e-06	-0.23633
chr14_21460885_-	ENSG00000129472.15	RAB2B	0.00475323	12.7831	6.09432e-06	0.233314	hsa-miR-3117-3p	ENSG00000162521.19	RBBP4	trans	0.0096768	-4.33435	4.03907e-06	-0.237637
chr14_21460885_-	ENSG00000129472.15	RAB2B	0.00475323	12.7831	6.09432e-06	0.233314	hsa-miR-3117-3p	ENSG00000163714.18	U2SURP	trans	0.00377568	-6.03464	6.86415e-07	-0.255391
chr14_21460885_-	ENSG00000129472.15	RAB2B	0.00475323	12.7831	6.09432e-06	0.233314	hsa-miR-3117-3p	ENSG00000163728.11	TTC14	trans	0.000738808	-6.56233	1.01459e-07	-0.273171
chr14_21460885_-	ENSG00000129472.15	RAB2B	0.00475323	12.7831	6.09432e-06	0.233314	hsa-miR-3117-3p	ENSG00000163848.20	ZNF148	trans	0.0017244	-2.64791	1.98721e-07	-0.267065
chr14_21460885_-	ENSG00000129472.15	RAB2B	0.00475323	12.7831	6.09432e-06	0.233314	hsa-miR-3117-3p	ENSG00000164048.14	ZNF589	trans	0.000440335	-1.98401	3.44249e-08	-0.282684
chr14_21460885_-	ENSG00000129472.15	RAB2B	0.00475323	12.7831	6.09432e-06	0.233314	hsa-miR-3117-3p	ENSG00000164073.11	MFSD8	trans	0.0210967	-2.25666	1.51178e-05	-0.22346
chr14_21460885_-	ENSG00000129472.15	RAB2B	0.00475323	12.7831	6.09432e-06	0.233314	hsa-miR-3117-3p	ENSG00000164134.13	NAA15	trans	0.00274525	-2.02004	7.33197e-07	-0.254754
chr14_21460885_-	ENSG00000129472.15	RAB2B	0.00475323	12.7831	6.09432e-06	0.233314	hsa-miR-3117-3p	ENSG00000164587.13	RPS14	trans	0.00100856	-188.791	3.77812e-07	-0.261085
chr14_21460885_-	ENSG00000129472.15	RAB2B	0.00475323	12.7831	6.09432e-06	0.233314	hsa-miR-3117-3p	ENSG00000164941.14	INTS8	trans	0.0420584	-4.66293	5.51795e-05	-0.208603
chr14_21460885_-	ENSG00000129472.15	RAB2B	0.00475323	12.7831	6.09432e-06	0.233314	hsa-miR-3117-3p	ENSG00000164983.7	TMEM65	trans	0.0145164	-1.23675	1.01282e-05	-0.227859
chr14_21460885_-	ENSG00000129472.15	RAB2B	0.00475323	12.7831	6.09432e-06	0.233314	hsa-miR-3117-3p	ENSG00000165516.11	KLHDC2	trans	0.000747988	-3.55771	4.22376e-08	-0.280911
chr14_21460885_-	ENSG00000129472.15	RAB2B	0.00475323	12.7831	6.09432e-06	0.233314	hsa-miR-3117-3p	ENSG00000165669.14	FAM204A	trans	0.0134677	-2.7974	5.02514e-06	-0.235352
chr14_21460885_-	ENSG00000129472.15	RAB2B	0.00475323	12.7831	6.09432e-06	0.233314	hsa-miR-3117-3p	ENSG00000166669.13	ATF7IP2	trans	0.0132212	-2.07166	1.15575e-05	-0.226419
chr14_21460885_-	ENSG00000129472.15	RAB2B	0.00475323	12.7831	6.09432e-06	0.233314	hsa-miR-3117-3p	ENSG00000166750.10	SLFN5	trans	0.00632896	-5.08921	2.80262e-06	-0.241411
chr14_21460885_-	ENSG00000129472.15	RAB2B	0.00475323	12.7831	6.09432e-06	0.233314	hsa-miR-3117-3p	ENSG00000167005.14	NUDT21	trans	0.0267744	-3.09926	1.24575e-05	-0.225596
chr14_21460885_-	ENSG00000129472.15	RAB2B	0.00475323	12.7831	6.09432e-06	0.233314	hsa-miR-3117-3p	ENSG00000167380.16	ZNF226	trans	6.25646e-05	-2.67793	5.55966e-10	-0.316074
chr14_21460885_-	ENSG00000129472.15	RAB2B	0.00475323	12.7831	6.09432e-06	0.233314	hsa-miR-3117-3p	ENSG00000167526.14	RPL13	trans	0.000421657	-208.039	7.70331e-08	-0.275629
chr14_21460885_-	ENSG00000129472.15	RAB2B	0.00475323	12.7831	6.09432e-06	0.233314	hsa-miR-3117-3p	ENSG00000167562.13	ZNF701	trans	0.00102504	-2.0202	5.77798e-08	-0.278171
chr14_21460885_-	ENSG00000129472.15	RAB2B	0.00475323	12.7831	6.09432e-06	0.233314	hsa-miR-3117-3p	ENSG00000168172.9	HOOK3	trans	0.00495383	-1.89747	1.18505e-06	-0.250063
chr14_21460885_-	ENSG00000129472.15	RAB2B	0.00475323	12.7831	6.09432e-06	0.233314	hsa-miR-3117-3p	ENSG00000168564.6	CDKN2AIP	trans	0.00145133	-1.55481	2.43579e-07	-0.265187
chr14_21460885_-	ENSG00000129472.15	RAB2B	0.00475323	12.7831	6.09432e-06	0.233314	hsa-miR-3117-3p	ENSG00000168876.9	ANKRD49	trans	0.00873686	-1.76933	2.22197e-06	-0.243776
chr14_21460885_-	ENSG00000129472.15	RAB2B	0.00475323	12.7831	6.09432e-06	0.233314	hsa-miR-3117-3p	ENSG00000169018.6	FEM1B	trans	0.0355478	-1.49324	6.3625e-05	-0.206903
chr14_21460885_-	ENSG00000129472.15	RAB2B	0.00475323	12.7831	6.09432e-06	0.233314	hsa-miR-3117-3p	ENSG00000170144.21	HNRNPA3	trans	0.00250566	-5.47174	3.9327e-07	-0.260707
chr14_21460885_-	ENSG00000129472.15	RAB2B	0.00475323	12.7831	6.09432e-06	0.233314	hsa-miR-3117-3p	ENSG00000170248.15	PDCD6IP	trans	0.030781	-10.3715	3.07646e-05	-0.215435
chr14_21460885_-	ENSG00000129472.15	RAB2B	0.00475323	12.7831	6.09432e-06	0.233314	hsa-miR-3117-3p	ENSG00000171490.13	RSL1D1	trans	3.98047e-05	-5.39478	6.04228e-10	-0.31544
chr14_21460885_-	ENSG00000129472.15	RAB2B	0.00475323	12.7831	6.09432e-06	0.233314	hsa-miR-3117-3p	ENSG00000173875.14	ZNF791	trans	0.000762919	-1.93142	4.55423e-08	-0.280255
chr14_21460885_-	ENSG00000129472.15	RAB2B	0.00475323	12.7831	6.09432e-06	0.233314	hsa-miR-3117-3p	ENSG00000174444.15	RPL4	trans	3.03492e-06	-113.08	5.33974e-11	-0.333327
chr14_21460885_-	ENSG00000129472.15	RAB2B	0.00475323	12.7831	6.09432e-06	0.233314	hsa-miR-3117-3p	ENSG00000174652.19	ZNF266	trans	0.00179878	-3.767	1.84276e-07	-0.267758
chr14_21460885_-	ENSG00000129472.15	RAB2B	0.00475323	12.7831	6.09432e-06	0.233314	hsa-miR-3117-3p	ENSG00000175061.18	SNHG29	trans	0.00305271	-12.4571	8.29278e-07	-0.25356
chr14_21460885_-	ENSG00000129472.15	RAB2B	0.00475323	12.7831	6.09432e-06	0.233314	hsa-miR-3117-3p	ENSG00000177189.14	RPS6KA3	trans	0.0411891	-3.40972	8.45595e-05	-0.203467
chr14_21460885_-	ENSG00000129472.15	RAB2B	0.00475323	12.7831	6.09432e-06	0.233314	hsa-miR-3117-3p	ENSG00000177426.22	TGIF1	trans	0.0476432	-1.73514	0.000118847	-0.199279
chr14_21460885_-	ENSG00000129472.15	RAB2B	0.00475323	12.7831	6.09432e-06	0.233314	hsa-miR-3117-3p	ENSG00000178177.16	LCORL	trans	0.0303035	-1.24388	2.23716e-05	-0.21907
chr14_21460885_-	ENSG00000129472.15	RAB2B	0.00475323	12.7831	6.09432e-06	0.233314	hsa-miR-3117-3p	ENSG00000180098.9	TRNAU1AP	trans	0.0395487	-1.33286	3.38815e-05	-0.214321
chr14_21460885_-	ENSG00000129472.15	RAB2B	0.00475323	12.7831	6.09432e-06	0.233314	hsa-miR-3117-3p	ENSG00000181026.15	AEN	trans	0.00613222	-1.84251	1.90125e-06	-0.245351
chr14_21460885_-	ENSG00000129472.15	RAB2B	0.00475323	12.7831	6.09432e-06	0.233314	hsa-miR-3117-3p	ENSG00000181722.17	ZBTB20	trans	0.00432715	-3.34936	2.05106e-06	-0.244586
chr14_21460885_-	ENSG00000129472.15	RAB2B	0.00475323	12.7831	6.09432e-06	0.233314	hsa-miR-3117-3p	ENSG00000182150.18	ERCC6L2	trans	0.00996229	-1.53654	5.8004e-06	-0.233838
chr14_21460885_-	ENSG00000129472.15	RAB2B	0.00475323	12.7831	6.09432e-06	0.233314	hsa-miR-3117-3p	ENSG00000183826.18	BTBD9	trans	0.0258551	-1.95457	3.68688e-05	-0.213341
chr14_21460885_-	ENSG00000129472.15	RAB2B	0.00475323	12.7831	6.09432e-06	0.233314	hsa-miR-3117-3p	ENSG00000184110.15	EIF3C	trans	0.006943	-4.73919	1.86508e-06	-0.245545
chr14_21460885_-	ENSG00000129472.15	RAB2B	0.00475323	12.7831	6.09432e-06	0.233314	hsa-miR-3117-3p	ENSG00000184743.13	ATL3	trans	0.0135931	-1.43194	4.89535e-06	-0.235627
chr14_21460885_-	ENSG00000129472.15	RAB2B	0.00475323	12.7831	6.09432e-06	0.233314	hsa-miR-3117-3p	ENSG00000185088.14	RPS27L	trans	0.00653965	-1.92639	1.9053e-06	-0.24533
chr14_21460885_-	ENSG00000129472.15	RAB2B	0.00475323	12.7831	6.09432e-06	0.233314	hsa-miR-3117-3p	ENSG00000185344.15	ATP6V0A2	trans	0.0352483	-2.06595	4.96748e-05	-0.209848
chr14_21460885_-	ENSG00000129472.15	RAB2B	0.00475323	12.7831	6.09432e-06	0.233314	hsa-miR-3117-3p	ENSG00000185658.14	BRWD1	trans	0.00203396	-5.23221	2.10885e-07	-0.266518
chr14_21460885_-	ENSG00000129472.15	RAB2B	0.00475323	12.7831	6.09432e-06	0.233314	hsa-miR-3117-3p	ENSG00000185811.19	IKZF1	trans	0.0168613	-20.8951	1.67374e-05	-0.222329
chr14_21460885_-	ENSG00000129472.15	RAB2B	0.00475323	12.7831	6.09432e-06	0.233314	hsa-miR-3117-3p	ENSG00000186166.9	CENATAC	trans	0.0155212	-3.97527	1.18495e-05	-0.226145
chr14_21460885_-	ENSG00000129472.15	RAB2B	0.00475323	12.7831	6.09432e-06	0.233314	hsa-miR-3117-3p	ENSG00000186432.10	KPNA4	trans	0.0385667	-3.57517	5.15409e-05	-0.209412
chr14_21460885_-	ENSG00000129472.15	RAB2B	0.00475323	12.7831	6.09432e-06	0.233314	hsa-miR-3117-3p	ENSG00000186468.13	RPS23	trans	0.000114556	-177.391	3.81918e-09	-0.301006
chr14_21460885_-	ENSG00000129472.15	RAB2B	0.00475323	12.7831	6.09432e-06	0.233314	hsa-miR-3117-3p	ENSG00000186812.13	ZNF397	trans	0.0261904	-2.98984	3.72744e-05	-0.213214
chr14_21460885_-	ENSG00000129472.15	RAB2B	0.00475323	12.7831	6.09432e-06	0.233314	hsa-miR-3117-3p	ENSG00000187239.17	FNBP1	trans	0.0489689	-6.24932	0.000109798	-0.200261
chr14_21460885_-	ENSG00000129472.15	RAB2B	0.00475323	12.7831	6.09432e-06	0.233314	hsa-miR-3117-3p	ENSG00000188529.15	SRSF10	trans	0.000154345	-6.72615	7.76882e-09	-0.295229
chr14_21460885_-	ENSG00000129472.15	RAB2B	0.00475323	12.7831	6.09432e-06	0.233314	hsa-miR-3117-3p	ENSG00000196262.15	PPIA	trans	1.04058e-05	-39.2839	6.76768e-11	-0.33163
chr14_21460885_-	ENSG00000129472.15	RAB2B	0.00475323	12.7831	6.09432e-06	0.233314	hsa-miR-3117-3p	ENSG00000196295.12	GARS1-DT	trans	0.0319645	-12.5824	3.39608e-05	-0.214294
chr14_21460885_-	ENSG00000129472.15	RAB2B	0.00475323	12.7831	6.09432e-06	0.233314	hsa-miR-3117-3p	ENSG00000196405.13	EVL	trans	0.005337	-28.0979	3.27469e-06	-0.239811
chr14_21460885_-	ENSG00000129472.15	RAB2B	0.00475323	12.7831	6.09432e-06	0.233314	hsa-miR-3117-3p	ENSG00000196628.20	TCF4	trans	0.0361863	-2.79728	1.69783e-05	-0.222169
chr14_21460885_-	ENSG00000129472.15	RAB2B	0.00475323	12.7831	6.09432e-06	0.233314	hsa-miR-3117-3p	ENSG00000197323.12	TRIM33	trans	0.0431898	-3.11272	6.78248e-05	-0.206136
chr14_21460885_-	ENSG00000129472.15	RAB2B	0.00475323	12.7831	6.09432e-06	0.233314	hsa-miR-3117-3p	ENSG00000197714.9	ZNF460	trans	0.0276096	-3.13821	5.83051e-05	-0.207947
chr14_21460885_-	ENSG00000129472.15	RAB2B	0.00475323	12.7831	6.09432e-06	0.233314	hsa-miR-3117-3p	ENSG00000197837.3	H4-16	trans	0.00479685	-22.3928	2.08055e-06	-0.244442
chr14_21460885_-	ENSG00000129472.15	RAB2B	0.00475323	12.7831	6.09432e-06	0.233314	hsa-miR-3117-3p	ENSG00000197857.14	ZNF44	trans	0.00015894	-1.84037	3.88442e-09	-0.300869
chr14_21460885_-	ENSG00000129472.15	RAB2B	0.00475323	12.7831	6.09432e-06	0.233314	hsa-miR-3117-3p	ENSG00000197969.14	VPS13A	trans	0.0212116	-1.75967	2.43296e-05	-0.218118
chr14_21460885_-	ENSG00000129472.15	RAB2B	0.00475323	12.7831	6.09432e-06	0.233314	hsa-miR-3117-3p	ENSG00000198000.12	NOL8	trans	0.00530835	-2.47242	6.91974e-07	-0.255314
chr14_21460885_-	ENSG00000129472.15	RAB2B	0.00475323	12.7831	6.09432e-06	0.233314	hsa-miR-3117-3p	ENSG00000198015.14	MRPL42	trans	0.0110372	-2.44921	6.65354e-06	-0.232381
chr14_21460885_-	ENSG00000129472.15	RAB2B	0.00475323	12.7831	6.09432e-06	0.233314	hsa-miR-3117-3p	ENSG00000198093.11	ZNF649	trans	2.30755e-05	-2.14198	2.66636e-10	-0.321603
chr14_21460885_-	ENSG00000129472.15	RAB2B	0.00475323	12.7831	6.09432e-06	0.233314	hsa-miR-3117-3p	ENSG00000198131.14	ZNF544	trans	0.0292981	-1.89915	6.0658e-05	-0.207475
chr14_21460885_-	ENSG00000129472.15	RAB2B	0.00475323	12.7831	6.09432e-06	0.233314	hsa-miR-3117-3p	ENSG00000198146.4	ZNF770	trans	0.00845042	-1.69296	3.66588e-06	-0.238644
chr14_21460885_-	ENSG00000129472.15	RAB2B	0.00475323	12.7831	6.09432e-06	0.233314	hsa-miR-3117-3p	ENSG00000198393.8	ZNF26	trans	0.00637832	-1.46874	2.07649e-06	-0.244462
chr14_21460885_-	ENSG00000129472.15	RAB2B	0.00475323	12.7831	6.09432e-06	0.233314	hsa-miR-3117-3p	ENSG00000198586.14	TLK1	trans	0.000830982	-2.68283	5.83666e-08	-0.278082
chr14_21460885_-	ENSG00000129472.15	RAB2B	0.00475323	12.7831	6.09432e-06	0.233314	hsa-miR-3117-3p	ENSG00000198851.10	CD3E	trans	0.000872772	-4.35858	1.22007e-07	-0.271511
chr14_21460885_-	ENSG00000129472.15	RAB2B	0.00475323	12.7831	6.09432e-06	0.233314	hsa-miR-3117-3p	ENSG00000198887.9	SMC5	trans	0.00773053	-1.80497	1.80555e-06	-0.245871
chr14_21460885_-	ENSG00000129472.15	RAB2B	0.00475323	12.7831	6.09432e-06	0.233314	hsa-miR-3117-3p	ENSG00000203865.11	ATP1A1-AS1	trans	0.01109	-2.13711	2.36402e-06	-0.243147
chr14_21460885_-	ENSG00000129472.15	RAB2B	0.00475323	12.7831	6.09432e-06	0.233314	hsa-miR-3117-3p	ENSG00000204406.14	MBD5	trans	0.0233049	-3.90569	1.93133e-05	-0.221022
chr14_21460885_-	ENSG00000129472.15	RAB2B	0.00475323	12.7831	6.09432e-06	0.233314	hsa-miR-3117-3p	ENSG00000205268.11	PDE7A	trans	0.00201976	-9.01697	1.22567e-06	-0.250062
chr14_21460885_-	ENSG00000129472.15	RAB2B	0.00475323	12.7831	6.09432e-06	0.233314	hsa-miR-3117-3p	ENSG00000205302.7	SNX2	trans	0.00579893	-7.8865	1.23498e-06	-0.249987
chr14_21460885_-	ENSG00000129472.15	RAB2B	0.00475323	12.7831	6.09432e-06	0.233314	hsa-miR-3117-3p	ENSG00000213047.13	DENND1B	trans	0.0287484	-1.55087	7.37411e-06	-0.231591
chr14_21460885_-	ENSG00000129472.15	RAB2B	0.00475323	12.7831	6.09432e-06	0.233314	hsa-miR-3117-3p	ENSG00000213593.10	TMX2	trans	0.0440016	-1.78365	7.69084e-05	-0.204894
chr14_21460885_-	ENSG00000129472.15	RAB2B	0.00475323	12.7831	6.09432e-06	0.233314	hsa-miR-3117-3p	ENSG00000221978.12	CCNL2	trans	0.0369195	-7.99203	7.69869e-05	-0.204881
chr14_21460885_-	ENSG00000129472.15	RAB2B	0.00475323	12.7831	6.09432e-06	0.233314	hsa-miR-3117-3p	ENSG00000224078.15	SNHG14	trans	0.00234138	-5.87142	6.36339e-08	-0.277686
chr14_21460885_-	ENSG00000129472.15	RAB2B	0.00475323	12.7831	6.09432e-06	0.233314	hsa-miR-3117-3p	ENSG00000225484.7	NUTM2B-AS1	trans	0.0465836	-3.13658	6.13812e-05	-0.207611
chr14_21460885_-	ENSG00000129472.15	RAB2B	0.00475323	12.7831	6.09432e-06	0.233314	hsa-miR-3117-3p	ENSG00000228956.8	SATB1-AS1	trans	0.00647897	-3.45197	2.57724e-06	-0.242913
chr14_21460885_-	ENSG00000129472.15	RAB2B	0.00475323	12.7831	6.09432e-06	0.233314	hsa-miR-3117-3p	ENSG00000230124.8	ACBD6	trans	0.00590771	-2.97932	1.1085e-06	-0.251388
chr14_21460885_-	ENSG00000129472.15	RAB2B	0.00475323	12.7831	6.09432e-06	0.233314	hsa-miR-3117-3p	ENSG00000231329.8	AL031772.1	trans	0.00842048	-2.52536	3.57807e-06	-0.239533
chr14_21460885_-	ENSG00000129472.15	RAB2B	0.00475323	12.7831	6.09432e-06	0.233314	hsa-miR-3117-3p	ENSG00000234444.10	ZNF736	trans	0.00337891	-1.8779	7.9941e-07	-0.254591
chr14_21460885_-	ENSG00000129472.15	RAB2B	0.00475323	12.7831	6.09432e-06	0.233314	hsa-miR-3117-3p	ENSG00000234741.8	GAS5	trans	0.00334161	-12.0757	1.28318e-06	-0.24994
chr14_21460885_-	ENSG00000129472.15	RAB2B	0.00475323	12.7831	6.09432e-06	0.233314	hsa-miR-3117-3p	ENSG00000235300.4	THRA1/BTR	trans	0.000576106	-2.53405	5.55276e-08	-0.279255
chr14_21460885_-	ENSG00000129472.15	RAB2B	0.00475323	12.7831	6.09432e-06	0.233314	hsa-miR-3117-3p	ENSG00000237945.7	LINC00649	trans	0.000753113	-3.09566	1.39584e-07	-0.271007
chr14_21460885_-	ENSG00000129472.15	RAB2B	0.00475323	12.7831	6.09432e-06	0.233314	hsa-miR-3117-3p	ENSG00000240682.10	ISY1	trans	0.0137331	-2.26605	5.98923e-06	-0.234122
chr14_21460885_-	ENSG00000129472.15	RAB2B	0.00475323	12.7831	6.09432e-06	0.233314	hsa-miR-3117-3p	ENSG00000242485.6	MRPL20	trans	0.0109476	-4.3215	4.7235e-06	-0.236632
chr14_21460885_-	ENSG00000129472.15	RAB2B	0.00475323	12.7831	6.09432e-06	0.233314	hsa-miR-3117-3p	ENSG00000244879.8	GABPB1-AS1	trans	0.0012741	-2.21901	1.24098e-07	-0.272074
chr14_21460885_-	ENSG00000129472.15	RAB2B	0.00475323	12.7831	6.09432e-06	0.233314	hsa-miR-3117-3p	ENSG00000245164.8	LINC00861	trans	0.000559462	-6.9422	5.8664e-08	-0.278771
chr14_21460885_-	ENSG00000129472.15	RAB2B	0.00475323	12.7831	6.09432e-06	0.233314	hsa-miR-3117-3p	ENSG00000247556.6	OIP5-AS1	trans	0.00206316	-4.5843	3.19864e-07	-0.263345
chr14_21460885_-	ENSG00000129472.15	RAB2B	0.00475323	12.7831	6.09432e-06	0.233314	hsa-miR-3117-3p	ENSG00000247828.8	TMEM161B-AS1	trans	0.004556	-3.30061	4.70406e-07	-0.259697
chr14_21460885_-	ENSG00000129472.15	RAB2B	0.00475323	12.7831	6.09432e-06	0.233314	hsa-miR-3117-3p	ENSG00000248643.5	RBM14-RBM4	trans	0.0226549	-4.27984	2.11385e-05	-0.220299
chr14_21460885_-	ENSG00000129472.15	RAB2B	0.00475323	12.7831	6.09432e-06	0.233314	hsa-miR-3117-3p	ENSG00000249592.6	AC139887.2	trans	0.0160559	-2.99754	1.51694e-05	-0.224021
chr14_21460885_-	ENSG00000129472.15	RAB2B	0.00475323	12.7831	6.09432e-06	0.233314	hsa-miR-3117-3p	ENSG00000249859.12	PVT1	trans	0.044696	-3.99817	2.76296e-05	-0.217249
chr14_21460885_-	ENSG00000129472.15	RAB2B	0.00475323	12.7831	6.09432e-06	0.233314	hsa-miR-3117-3p	ENSG00000251022.6	THAP9-AS1	trans	0.00425149	-3.40348	9.45418e-07	-0.252953
chr14_21460885_-	ENSG00000129472.15	RAB2B	0.00475323	12.7831	6.09432e-06	0.233314	hsa-miR-3117-3p	ENSG00000255529.9	POLR2M	trans	0.00616449	-6.11416	2.06133e-06	-0.245515
chr14_21460885_-	ENSG00000129472.15	RAB2B	0.00475323	12.7831	6.09432e-06	0.233314	hsa-miR-3117-3p	ENSG00000257093.7	DENND11	trans	0.0107429	-1.93474	1.16298e-05	-0.227261
chr14_21460885_-	ENSG00000129472.15	RAB2B	0.00475323	12.7831	6.09432e-06	0.233314	hsa-miR-3117-3p	ENSG00000257218.6	GATC	trans	0.0118798	-1.35827	1.07238e-05	-0.22815
chr14_21460885_-	ENSG00000129472.15	RAB2B	0.00475323	12.7831	6.09432e-06	0.233314	hsa-miR-3117-3p	ENSG00000261490.1	AC005674.1	trans	0.0314685	-1.30517	4.71565e-05	-0.211311
chr14_21460885_-	ENSG00000129472.15	RAB2B	0.00475323	12.7831	6.09432e-06	0.233314	hsa-miR-3117-3p	ENSG00000261824.7	LINC00662	trans	0.0102158	-2.17802	2.51455e-08	-0.286511
chr14_21460885_-	ENSG00000129472.15	RAB2B	0.00475323	12.7831	6.09432e-06	0.233314	hsa-miR-3117-3p	ENSG00000266173.7	STRADA	trans	0.0327409	-5.06434	5.47134e-05	-0.209546
chr14_21460885_-	ENSG00000129472.15	RAB2B	0.00475323	12.7831	6.09432e-06	0.233314	hsa-miR-3117-3p	ENSG00000268362.6	AC092279.1	trans	0.0201466	-3.92698	1.90115e-05	-0.221793
chr14_21460885_-	ENSG00000129472.15	RAB2B	0.00475323	12.7831	6.09432e-06	0.233314	hsa-miR-3117-3p	ENSG00000281005.1	LINC00921	trans	0.0199729	-2.35404	1.78609e-05	-0.222495
chr14_21460885_-	ENSG00000129472.15	RAB2B	0.00475323	12.7831	6.09432e-06	0.233314	hsa-miR-3117-3p	ENSG00000286065.2	SLFN12L	trans	0.0341505	-1.81788	5.1236e-05	-0.210328
chr14_21460885_-	ENSG00000129472.15	RAB2B	0.00475323	12.7831	6.09432e-06	0.233314	hsa-miR-4759	ENSG00000005020.13	SKAP2	trans	0.0331615	-4.41559	3.96718e-05	-0.212205
chr14_21460885_-	ENSG00000129472.15	RAB2B	0.00475323	12.7831	6.09432e-06	0.233314	hsa-miR-4759	ENSG00000005700.15	IBTK	trans	0.00932618	-1.21136	4.75548e-06	-0.235618
chr14_21460885_-	ENSG00000129472.15	RAB2B	0.00475323	12.7831	6.09432e-06	0.233314	hsa-miR-4759	ENSG00000007168.14	PAFAH1B1	trans	0.0146441	-4.91571	8.86038e-06	-0.229003
chr14_21460885_-	ENSG00000129472.15	RAB2B	0.00475323	12.7831	6.09432e-06	0.233314	hsa-miR-4759	ENSG00000011295.16	TTC19	trans	0.00222584	-3.88236	1.7153e-07	-0.268062
chr14_21460885_-	ENSG00000129472.15	RAB2B	0.00475323	12.7831	6.09432e-06	0.233314	hsa-miR-4759	ENSG00000014824.14	SLC30A9	trans	0.00178228	-2.19234	1.37909e-07	-0.270046
chr14_21460885_-	ENSG00000129472.15	RAB2B	0.00475323	12.7831	6.09432e-06	0.233314	hsa-miR-4759	ENSG00000015171.20	ZMYND11	trans	0.0151575	-1.31826	1.14735e-05	-0.226197
chr14_21460885_-	ENSG00000129472.15	RAB2B	0.00475323	12.7831	6.09432e-06	0.233314	hsa-miR-4759	ENSG00000018510.17	AGPS	trans	0.0370262	-1.24954	1.65383e-05	-0.222166
chr14_21460885_-	ENSG00000129472.15	RAB2B	0.00475323	12.7831	6.09432e-06	0.233314	hsa-miR-4759	ENSG00000021776.11	AQR	trans	0.021342	-1.49109	1.9876e-05	-0.220111
chr14_21460885_-	ENSG00000129472.15	RAB2B	0.00475323	12.7831	6.09432e-06	0.233314	hsa-miR-4759	ENSG00000025770.19	NCAPH2	trans	0.0476989	-1.4703	0.000116786	-0.199229
chr14_21460885_-	ENSG00000129472.15	RAB2B	0.00475323	12.7831	6.09432e-06	0.233314	hsa-miR-4759	ENSG00000029363.17	BCLAF1	trans	0.00595601	-12.0168	2.03746e-06	-0.24433
chr14_21460885_-	ENSG00000129472.15	RAB2B	0.00475323	12.7831	6.09432e-06	0.233314	hsa-miR-4759	ENSG00000033800.14	PIAS1	trans	0.0114553	-7.64093	4.844e-06	-0.235425
chr14_21460885_-	ENSG00000129472.15	RAB2B	0.00475323	12.7831	6.09432e-06	0.233314	hsa-miR-4759	ENSG00000035928.16	RFC1	trans	0.0228472	-1.6201	8.29057e-06	-0.229719
chr14_21460885_-	ENSG00000129472.15	RAB2B	0.00475323	12.7831	6.09432e-06	0.233314	hsa-miR-4759	ENSG00000036257.13	CUL3	trans	0.00484644	-4.54536	6.572e-07	-0.255473
chr14_21460885_-	ENSG00000129472.15	RAB2B	0.00475323	12.7831	6.09432e-06	0.233314	hsa-miR-4759	ENSG00000036549.13	ZZZ3	trans	1.94057e-05	-3.38821	3.08992e-10	-0.320089
chr14_21460885_-	ENSG00000129472.15	RAB2B	0.00475323	12.7831	6.09432e-06	0.233314	hsa-miR-4759	ENSG00000039123.16	MTREX	trans	0.0252443	-3.36537	1.80214e-05	-0.221208
chr14_21460885_-	ENSG00000129472.15	RAB2B	0.00475323	12.7831	6.09432e-06	0.233314	hsa-miR-4759	ENSG00000039319.17	ZFYVE16	trans	0.0410928	-4.10904	4.95966e-05	-0.209587
chr14_21460885_-	ENSG00000129472.15	RAB2B	0.00475323	12.7831	6.09432e-06	0.233314	hsa-miR-4759	ENSG00000047346.12	FAM214A	trans	0.00418535	-5.5563	6.45352e-07	-0.255648
chr14_21460885_-	ENSG00000129472.15	RAB2B	0.00475323	12.7831	6.09432e-06	0.233314	hsa-miR-4759	ENSG00000047932.14	GOPC	trans	0.00953782	-1.27017	6.44965e-06	-0.232403
chr14_21460885_-	ENSG00000129472.15	RAB2B	0.00475323	12.7831	6.09432e-06	0.233314	hsa-miR-4759	ENSG00000048649.13	RSF1	trans	0.00584698	-3.96433	7.97206e-07	-0.253608
chr14_21460885_-	ENSG00000129472.15	RAB2B	0.00475323	12.7831	6.09432e-06	0.233314	hsa-miR-4759	ENSG00000049618.24	ARID1B	trans	0.0181712	-7.83131	9.46829e-06	-0.228286
chr14_21460885_-	ENSG00000129472.15	RAB2B	0.00475323	12.7831	6.09432e-06	0.233314	hsa-miR-4759	ENSG00000055044.11	NOP58	trans	0.000369774	-4.79957	4.63691e-08	-0.279731
chr14_21460885_-	ENSG00000129472.15	RAB2B	0.00475323	12.7831	6.09432e-06	0.233314	hsa-miR-4759	ENSG00000055163.20	CYFIP2	trans	0.021486	-11.1218	1.96011e-05	-0.220267
chr14_21460885_-	ENSG00000129472.15	RAB2B	0.00475323	12.7831	6.09432e-06	0.233314	hsa-miR-4759	ENSG00000055917.16	PUM2	trans	0.0155522	-6.53488	9.12459e-06	-0.228686
chr14_21460885_-	ENSG00000129472.15	RAB2B	0.00475323	12.7831	6.09432e-06	0.233314	hsa-miR-4759	ENSG00000058063.16	ATP11B	trans	0.00331502	-6.9066	5.5244e-07	-0.257138
chr14_21460885_-	ENSG00000129472.15	RAB2B	0.00475323	12.7831	6.09432e-06	0.233314	hsa-miR-4759	ENSG00000065615.14	CYB5R4	trans	0.0296298	-4.91066	2.9579e-05	-0.215599
chr14_21460885_-	ENSG00000129472.15	RAB2B	0.00475323	12.7831	6.09432e-06	0.233314	hsa-miR-4759	ENSG00000065883.16	CDK13	trans	0.00686866	-7.36021	1.97008e-06	-0.244669
chr14_21460885_-	ENSG00000129472.15	RAB2B	0.00475323	12.7831	6.09432e-06	0.233314	hsa-miR-4759	ENSG00000066294.15	CD84	trans	0.0105376	-3.13209	3.24477e-06	-0.239588
chr14_21460885_-	ENSG00000129472.15	RAB2B	0.00475323	12.7831	6.09432e-06	0.233314	hsa-miR-4759	ENSG00000066777.9	ARFGEF1	trans	0.00767461	-3.7899	3.36762e-06	-0.239205
chr14_21460885_-	ENSG00000129472.15	RAB2B	0.00475323	12.7831	6.09432e-06	0.233314	hsa-miR-4759	ENSG00000067955.15	CBFB	trans	0.0123342	-3.50672	5.93362e-06	-0.233287
chr14_21460885_-	ENSG00000129472.15	RAB2B	0.00475323	12.7831	6.09432e-06	0.233314	hsa-miR-4759	ENSG00000070756.17	PABPC1	trans	0.0056369	-32.1005	1.47263e-06	-0.247581
chr14_21460885_-	ENSG00000129472.15	RAB2B	0.00475323	12.7831	6.09432e-06	0.233314	hsa-miR-4759	ENSG00000074706.13	IPCEF1	trans	0.039436	-3.27874	0.000105648	-0.200469
chr14_21460885_-	ENSG00000129472.15	RAB2B	0.00475323	12.7831	6.09432e-06	0.233314	hsa-miR-4759	ENSG00000076641.4	PAG1	trans	0.0341593	-3.59228	7.70745e-05	-0.20432
chr14_21460885_-	ENSG00000129472.15	RAB2B	0.00475323	12.7831	6.09432e-06	0.233314	hsa-miR-4759	ENSG00000077232.18	DNAJC10	trans	0.00909969	-2.26656	6.4467e-06	-0.232408
chr14_21460885_-	ENSG00000129472.15	RAB2B	0.00475323	12.7831	6.09432e-06	0.233314	hsa-miR-4759	ENSG00000077458.13	FAM76B	trans	0.0188717	-2.78182	9.62064e-06	-0.228113
chr14_21460885_-	ENSG00000129472.15	RAB2B	0.00475323	12.7831	6.09432e-06	0.233314	hsa-miR-4759	ENSG00000078142.13	PIK3C3	trans	0.00947878	-4.81653	4.21518e-06	-0.236878
chr14_21460885_-	ENSG00000129472.15	RAB2B	0.00475323	12.7831	6.09432e-06	0.233314	hsa-miR-4759	ENSG00000079246.16	XRCC5	trans	0.0104381	-10.8369	5.81553e-06	-0.2335
chr14_21460885_-	ENSG00000129472.15	RAB2B	0.00475323	12.7831	6.09432e-06	0.233314	hsa-miR-4759	ENSG00000080371.6	RAB21	trans	0.0178954	-2.97125	1.28295e-05	-0.224973
chr14_21460885_-	ENSG00000129472.15	RAB2B	0.00475323	12.7831	6.09432e-06	0.233314	hsa-miR-4759	ENSG00000080824.19	HSP90AA1	trans	0.000147823	-9.57002	4.66436e-09	-0.299002
chr14_21460885_-	ENSG00000129472.15	RAB2B	0.00475323	12.7831	6.09432e-06	0.233314	hsa-miR-4759	ENSG00000081019.13	RSBN1	trans	0.00455414	-1.39569	1.08282e-06	-0.25062
chr14_21460885_-	ENSG00000129472.15	RAB2B	0.00475323	12.7831	6.09432e-06	0.233314	hsa-miR-4759	ENSG00000081320.11	STK17B	trans	0.0233017	-14.4332	2.29472e-05	-0.218491
chr14_21460885_-	ENSG00000129472.15	RAB2B	0.00475323	12.7831	6.09432e-06	0.233314	hsa-miR-4759	ENSG00000081665.14	ZNF506	trans	0.000145758	-4.40155	8.31223e-09	-0.294288
chr14_21460885_-	ENSG00000129472.15	RAB2B	0.00475323	12.7831	6.09432e-06	0.233314	hsa-miR-4759	ENSG00000082153.18	BZW1	trans	0.015387	-7.14153	1.14181e-05	-0.22625
chr14_21460885_-	ENSG00000129472.15	RAB2B	0.00475323	12.7831	6.09432e-06	0.233314	hsa-miR-4759	ENSG00000082898.18	XPO1	trans	0.0171503	-5.23988	1.52324e-05	-0.223079
chr14_21460885_-	ENSG00000129472.15	RAB2B	0.00475323	12.7831	6.09432e-06	0.233314	hsa-miR-4759	ENSG00000083520.15	DIS3	trans	0.000643116	-1.93901	3.34204e-08	-0.282569
chr14_21460885_-	ENSG00000129472.15	RAB2B	0.00475323	12.7831	6.09432e-06	0.233314	hsa-miR-4759	ENSG00000083642.19	PDS5B	trans	0.041695	-2.23555	6.52272e-05	-0.206329
chr14_21460885_-	ENSG00000129472.15	RAB2B	0.00475323	12.7831	6.09432e-06	0.233314	hsa-miR-4759	ENSG00000083799.18	CYLD	trans	0.0123435	-9.70768	9.59291e-06	-0.228144
chr14_21460885_-	ENSG00000129472.15	RAB2B	0.00475323	12.7831	6.09432e-06	0.233314	hsa-miR-4759	ENSG00000083844.10	ZNF264	trans	0.0340318	-3.18871	4.27309e-05	-0.211337
chr14_21460885_-	ENSG00000129472.15	RAB2B	0.00475323	12.7831	6.09432e-06	0.233314	hsa-miR-4759	ENSG00000084072.17	PPIE	trans	0.00441375	-2.01756	1.12683e-06	-0.250229
chr14_21460885_-	ENSG00000129472.15	RAB2B	0.00475323	12.7831	6.09432e-06	0.233314	hsa-miR-4759	ENSG00000085224.23	ATRX	trans	0.0194729	-5.81035	2.19348e-05	-0.219001
chr14_21460885_-	ENSG00000129472.15	RAB2B	0.00475323	12.7831	6.09432e-06	0.233314	hsa-miR-4759	ENSG00000087470.18	DNM1L	trans	0.00121717	-3.08882	1.29141e-07	-0.270641
chr14_21460885_-	ENSG00000129472.15	RAB2B	0.00475323	12.7831	6.09432e-06	0.233314	hsa-miR-4759	ENSG00000088179.9	PTPN4	trans	0.0274683	-2.4303	3.02233e-05	-0.215351
chr14_21460885_-	ENSG00000129472.15	RAB2B	0.00475323	12.7831	6.09432e-06	0.233314	hsa-miR-4759	ENSG00000088387.19	DOCK9	trans	0.00773398	-1.73879	6.07841e-06	-0.233032
chr14_21460885_-	ENSG00000129472.15	RAB2B	0.00475323	12.7831	6.09432e-06	0.233314	hsa-miR-4759	ENSG00000090060.18	PAPOLA	trans	0.00986334	-13.5028	4.07221e-06	-0.237237
chr14_21460885_-	ENSG00000129472.15	RAB2B	0.00475323	12.7831	6.09432e-06	0.233314	hsa-miR-4759	ENSG00000090686.16	USP48	trans	0.00618314	-4.19554	2.04609e-06	-0.244287
chr14_21460885_-	ENSG00000129472.15	RAB2B	0.00475323	12.7831	6.09432e-06	0.233314	hsa-miR-4759	ENSG00000092108.22	SCFD1	trans	0.0110523	-4.58043	2.25709e-06	-0.243295
chr14_21460885_-	ENSG00000129472.15	RAB2B	0.00475323	12.7831	6.09432e-06	0.233314	hsa-miR-4759	ENSG00000092931.11	MFSD11	trans	0.0282056	-1.55436	1.80257e-05	-0.221206
chr14_21460885_-	ENSG00000129472.15	RAB2B	0.00475323	12.7831	6.09432e-06	0.233314	hsa-miR-4759	ENSG00000093144.19	ECHDC1	trans	0.000428384	-3.85856	1.30332e-08	-0.290558
chr14_21460885_-	ENSG00000129472.15	RAB2B	0.00475323	12.7831	6.09432e-06	0.233314	hsa-miR-4759	ENSG00000095787.23	WAC	trans	0.0181951	-9.9374	1.32449e-05	-0.224623
[truncated: 482 more rows]

## Sheet: TableS9
Table S9. The PD-related and expression regulation-related pathways for genes associated with the editing events in their miRNA competing genes by DAVID (P<0.05)
[truncated: 15 more rows]

[truncated: 4 more sheets: TableS10, TableS11, TableS12, TableS13]
